# Supplementary material for: Comprehensive analysis of the role of PTGFRN as a new potential biomarker in lung adenocarcinoma
Source: Research Square preprint supplement (doi:10.21203/rs.3.rs-5040921/v1), 2025-04-28
Supplement: Supplementary file 1 [file be695dbf0376a041e49a7e13.xlsx]

## Sheet: Expression level of PTGFRN
Supplementary Table 1: PTGFRN expression in Pan-cancer
sample	PTGFRN
TCGA-IQ-A61O-01	9.512
TCGA-BB-7872-01	8.834
TCGA-DX-A3M1-01	8.655
TCGA-LN-A49W-01	8.637
TCGA-E2-A1LS-01	8.628
TCGA-DX-A3UC-01	8.621
TCGA-JX-A5QV-01	8.554
TCGA-EA-A1QS-01	8.544
TCGA-A8-A0A6-01	8.537
TCGA-QK-A8Z9-01	8.52
TCGA-2J-AABO-01	8.432
TCGA-D6-A6EQ-01	8.391
TCGA-LN-A5U6-01	8.367
TCGA-CV-7415-01	8.35
TCGA-LP-A4AV-01	8.267
TCGA-DX-A23Z-01	8.262
TCGA-NK-A5CT-01	8.25
TCGA-FD-A3B4-01	8.25
TCGA-HD-8635-01	8.247
TCGA-BB-7871-01	8.233
TCGA-DX-A2J0-01	8.179
TCGA-DX-A48P-01	8.178
TCGA-DX-A3LW-01	8.176
TCGA-QQ-A8VD-01	8.135
TCGA-EK-A2RA-01	8.131
TCGA-21-A5DI-01	8.113
TCGA-P3-A5QA-01	8.096
TCGA-P3-A6SX-01	8.091
TCGA-B6-A0WX-01	8.039
TCGA-EK-A2IP-01	8.022
TCGA-63-A5ML-01	8.017
TCGA-IG-A97H-01	7.988
TCGA-Z4-A8JB-01	7.98
TCGA-77-8146-01	7.973
TCGA-QK-A6IH-01	7.969
TCGA-85-A5B5-01	7.963
TCGA-BA-7269-01	7.951
TCGA-Q9-A6FU-01	7.939
TCGA-N5-A59E-01	7.933
TCGA-DK-A6B5-01	7.92
TCGA-OR-A5KX-01	7.915
TCGA-CV-A6JD-01	7.909
TCGA-EK-A2R9-01	7.902
TCGA-Y8-A895-01	7.89
TCGA-IQ-A61G-01	7.889
TCGA-DX-AB3C-01	7.869
TCGA-UD-AABY-01	7.863
TCGA-EA-A78R-01	7.859
TCGA-VS-A8EB-01	7.852
TCGA-DX-A23R-01	7.838
TCGA-BA-6868-01	7.833
TCGA-60-2720-01	7.822
TCGA-D3-A8GE-06	7.813
TCGA-PC-A5DL-01	7.813
TCGA-77-A5G6-01	7.808
TCGA-FD-A5BU-01	7.806
TCGA-2Z-A9JQ-01	7.803
TCGA-DX-A7EU-01	7.796
TCGA-IZ-A6M9-01	7.793
TCGA-56-8626-01	7.789
TCGA-AO-A03N-01	7.786
TCGA-N5-A4RS-01	7.785
TCGA-B1-A47M-01	7.781
TCGA-F9-A7VF-01	7.776
TCGA-77-A5G1-01	7.769
TCGA-JW-A5VG-01	7.761
TCGA-VS-A8Q8-01	7.761
TCGA-CV-A6JE-01	7.76
TCGA-FD-A5BY-01	7.756
TCGA-56-A4ZJ-01	7.755
TCGA-P3-A6T8-01	7.75
TCGA-HM-A3JK-01	7.744
TCGA-77-8130-01	7.739
TCGA-CV-6950-01	7.735
TCGA-77-8008-01	7.732
TCGA-GC-A3RC-01	7.724
TCGA-BP-4770-01	7.697
TCGA-F7-8298-01	7.696
TCGA-CQ-7069-01	7.696
TCGA-UZ-A9PZ-01	7.694
TCGA-MH-A55Z-01	7.694
TCGA-DS-A0VK-01	7.688
TCGA-QK-A64Z-01	7.678
TCGA-DK-AA6L-01	7.677
TCGA-F7-A622-01	7.665
TCGA-DK-A3WW-01	7.661
TCGA-CV-7413-01	7.65
TCGA-DS-A1O9-01	7.649
TCGA-DX-AB3A-01	7.648
TCGA-GC-A3YS-01	7.646
TCGA-27-1831-01	7.644
TCGA-DX-A3U9-01	7.636
TCGA-F7-A61W-01	7.635
TCGA-B1-A657-01	7.635
TCGA-2F-A9KT-01	7.631
TCGA-DX-AB35-01	7.612
TCGA-FX-A3NJ-01	7.606
TCGA-QK-A8Z7-01	7.601
TCGA-36-1581-01	7.6
TCGA-58-A46K-01	7.598
TCGA-EK-A2GZ-01	7.587
TCGA-CV-7423-01	7.586
TCGA-GV-A40E-01	7.585
TCGA-CV-A6JU-01	7.584
TCGA-DQ-7589-01	7.583
TCGA-85-8479-01	7.58
TCGA-EK-A2PI-01	7.578
TCGA-LL-A6FR-01	7.578
TCGA-LN-A49N-01	7.576
TCGA-VR-AA7D-01	7.575
TCGA-77-7335-01	7.575
TCGA-LN-A49O-01	7.573
TCGA-DX-AB2L-01	7.559
TCGA-VS-A8EC-01	7.554
TCGA-B4-5832-01	7.553
TCGA-FD-A43Y-01	7.546
TCGA-UF-A7JT-01	7.545
TCGA-34-A5IX-01	7.538
TCGA-CV-6945-01	7.537
TCGA-DX-A6BA-01	7.527
TCGA-X6-A8C5-01	7.521
TCGA-CV-5970-01	7.517
TCGA-VS-A9UY-01	7.514
TCGA-MH-A562-01	7.512
TCGA-77-7337-01	7.509
TCGA-IE-A4EH-01	7.487
TCGA-EO-A3KX-01	7.486
TCGA-LN-A4A9-01	7.486
TCGA-33-AASD-01	7.464
TCGA-77-8138-01	7.463
TCGA-LN-A7HV-01	7.459
TCGA-EK-A2H1-01	7.455
TCGA-DQ-5631-01	7.454
TCGA-AJ-A3NH-01	7.453
TCGA-34-5929-01	7.452
TCGA-W3-A828-06	7.449
TCGA-DX-A1KY-01	7.448
TCGA-EX-A1H5-01	7.447
TCGA-K4-A4AC-01	7.447
TCGA-DX-A48O-01	7.445
TCGA-IQ-7630-01	7.442
TCGA-IR-A3LC-01	7.439
TCGA-ZJ-AB0I-01	7.436
TCGA-VS-A9UD-01	7.426
TCGA-CR-7383-01	7.417
TCGA-CV-7568-01	7.417
TCGA-E2-A1IF-01	7.415
TCGA-39-5027-01	7.415
TCGA-DX-A3LT-01	7.415
TCGA-HM-A3JJ-01	7.41
TCGA-CV-7236-01	7.409
TCGA-HD-7753-01	7.408
TCGA-ZF-AA4W-01	7.405
TCGA-DX-A1L2-01	7.404
TCGA-UF-A7J9-01	7.404
TCGA-T2-A6WX-01	7.395
TCGA-DX-A3M2-01	7.394
TCGA-P4-A5ED-01	7.393
TCGA-5N-A9KM-01	7.383
TCGA-XF-A9SK-01	7.382
TCGA-QF-A5YT-01	7.377
TCGA-XF-A9T4-01	7.374
TCGA-FX-A48G-01	7.373
TCGA-IW-A3M5-01	7.372
TCGA-CQ-5333-01	7.369
TCGA-BH-A6R9-01	7.364
TCGA-BA-A6DG-01	7.356
TCGA-98-8020-01	7.356
TCGA-XF-AAN5-01	7.349
TCGA-EY-A547-01	7.347
TCGA-K1-A3PN-02	7.347
TCGA-E2-A1IJ-01	7.346
TCGA-85-A4QQ-01	7.346
TCGA-IR-A3LL-01	7.344
TCGA-BA-6872-01	7.342
TCGA-CQ-7065-01	7.342
TCGA-QK-A6IJ-01	7.341
TCGA-S4-A8RO-01	7.336
TCGA-C5-A7UE-01	7.334
TCGA-DQ-7592-01	7.326
TCGA-UF-A7JK-01	7.323
TCGA-A4-A6HP-01	7.319
TCGA-CR-7380-01	7.318
TCGA-D8-A1XT-01	7.316
TCGA-HL-7533-01	7.309
TCGA-QM-A5NM-01	7.308
TCGA-CR-6474-01	7.306
TCGA-AX-A3G9-01	7.306
TCGA-VS-A8EI-01	7.304
TCGA-CR-7382-01	7.297
TCGA-KD-A5QS-01	7.296
TCGA-ZF-AA58-01	7.294
TCGA-DX-A1KZ-01	7.292
TCGA-ZF-A9RC-01	7.284
TCGA-WK-A8XY-01	7.284
TCGA-EA-A43B-01	7.282
TCGA-C5-A2LV-01	7.281
TCGA-CV-7434-01	7.279
TCGA-C5-A8YR-01	7.279
TCGA-BG-A3EW-11	7.276
TCGA-77-A5GB-01	7.275
TCGA-UF-A7JA-01	7.273
TCGA-P3-A6T3-01	7.273
TCGA-DK-A3IQ-01	7.27
TCGA-FX-A2QS-01	7.266
TCGA-R2-A69V-01	7.266
TCGA-VS-A9UL-01	7.261
TCGA-HD-7831-01	7.261
TCGA-DX-A2J4-01	7.26
TCGA-C5-A8ZZ-01	7.255
TCGA-CR-6477-01	7.253
TCGA-39-5037-01	7.251
TCGA-CV-6934-01	7.25
TCGA-60-2710-01	7.25
TCGA-GH-A9DA-01	7.246
TCGA-OR-A5LD-01	7.246
TCGA-DK-A2I2-01	7.244
TCGA-J7-6720-01	7.241
TCGA-C5-A1BE-01	7.24
TCGA-CQ-7072-01	7.238
TCGA-VS-A954-01	7.238
TCGA-PQ-A6FN-01	7.237
TCGA-CV-5979-01	7.236
TCGA-AN-A0FN-01	7.235
TCGA-EB-A44R-06	7.231
TCGA-DD-A3A6-01	7.229
TCGA-DW-7836-01	7.227
TCGA-C5-A1MN-01	7.226
TCGA-MA-AA3Z-01	7.224
TCGA-DK-AA74-01	7.223
TCGA-VR-AA7B-01	7.222
TCGA-VT-A80G-01	7.221
TCGA-E2-A1LL-01	7.221
TCGA-BG-A2AD-11	7.217
TCGA-DS-A7WI-01	7.216
TCGA-56-A62T-01	7.215
TCGA-CR-6488-01	7.214
TCGA-QK-A6IG-01	7.213
TCGA-UY-A8OB-01	7.21
TCGA-3B-A9I3-01	7.21
TCGA-Y8-A8S0-01	7.206
TCGA-DR-A0ZM-01	7.205
TCGA-P3-A6T0-01	7.204
TCGA-AX-A3FZ-01	7.204
TCGA-DF-A2KZ-01	7.202
TCGA-E2-A14W-01	7.2
TCGA-AX-A3GB-01	7.199
TCGA-VS-A94Y-01	7.197
TCGA-CR-7373-01	7.195
TCGA-UZ-A9PJ-01	7.192
TCGA-G2-A3IB-01	7.189
TCGA-UY-A8OC-01	7.186
TCGA-KT-A7W1-01	7.185
TCGA-DX-AB2H-01	7.184
TCGA-OL-A97C-01	7.184
TCGA-UZ-A9PV-01	7.184
TCGA-DK-AA6Q-01	7.183
TCGA-QQ-A5VD-01	7.181
TCGA-DK-AA6S-01	7.179
TCGA-CV-7090-01	7.177
TCGA-VM-A8C9-01	7.176
TCGA-90-A4ED-01	7.174
TCGA-CV-5966-01	7.173
TCGA-EY-A3QX-01	7.172
TCGA-CQ-A4CA-01	7.167
TCGA-77-7338-01	7.166
TCGA-CV-6938-01	7.164
TCGA-D6-6825-01	7.164
TCGA-JW-A5VK-01	7.16
TCGA-ZJ-AAXI-01	7.158
TCGA-C5-A7CL-01	7.154
TCGA-AP-A5FX-01	7.154
TCGA-E2-A1IH-01	7.15
TCGA-BK-A4ZD-01	7.15
TCGA-EA-A5ZE-01	7.149
TCGA-CR-7386-01	7.145
TCGA-E9-A3X8-01	7.145
TCGA-EK-A3GJ-01	7.142
TCGA-FX-A3NK-01	7.142
TCGA-D6-A6EP-01	7.14
TCGA-IB-AAUV-01	7.14
TCGA-IQ-A61E-01	7.138
TCGA-FD-A3B5-01	7.137
TCGA-MB-A8JK-01	7.135
TCGA-QK-AA3K-01	7.133
TCGA-E2-A570-01	7.131
TCGA-90-6837-01	7.13
TCGA-CV-7247-01	7.123
TCGA-BB-4224-01	7.118
TCGA-D6-A4Z9-01	7.117
TCGA-D1-A3DA-01	7.115
TCGA-50-5931-01	7.115
TCGA-DQ-5624-01	7.115
TCGA-3N-A9WB-06	7.112
TCGA-3B-A9HZ-01	7.11
TCGA-BT-A20R-01	7.108
TCGA-GM-A5PX-01	7.107
TCGA-CQ-6224-01	7.106
TCGA-BG-A3PP-01	7.104
TCGA-IG-A97I-01	7.104
TCGA-85-A512-01	7.101
TCGA-AX-A3G4-01	7.1
TCGA-CV-A45U-01	7.1
TCGA-PN-A8MA-01	7.099
TCGA-AC-A5XS-01	7.095
TCGA-ZF-AA4N-01	7.094
TCGA-ZF-AA56-01	7.094
TCGA-EA-A5ZD-01	7.093
TCGA-CV-6003-01	7.09
TCGA-DX-A6Z2-01	7.088
TCGA-56-8082-01	7.087
TCGA-N5-A4RF-01	7.087
TCGA-XF-A9SW-01	7.083
TCGA-DS-A1OA-01	7.082
TCGA-XN-A8T3-01	7.079
TCGA-P3-A6T2-01	7.079
TCGA-BA-A6D8-01	7.078
TCGA-HB-A3YV-01	7.076
TCGA-Q1-A5R3-01	7.076
TCGA-CN-4742-01	7.076
TCGA-AX-A0IZ-11	7.074
TCGA-A4-A5DU-01	7.074
TCGA-WA-A7H4-01	7.07
TCGA-F7-A50J-01	7.07
TCGA-ZP-A9D2-01	7.067
TCGA-P3-A5Q6-01	7.066
TCGA-DX-A6BE-01	7.065
TCGA-UF-A71A-06	7.064
TCGA-E5-A2PC-01	7.063
TCGA-H7-A6C4-01	7.062
TCGA-G2-A2EF-01	7.061
TCGA-A2-A04W-01	7.058
TCGA-BA-6873-01	7.058
TCGA-CV-5973-01	7.058
TCGA-86-6562-01	7.057
TCGA-EK-A2RO-01	7.057
TCGA-UF-A7JS-01	7.057
TCGA-IE-A4EK-01	7.057
TCGA-DR-A0ZL-01	7.056
TCGA-EK-A2RN-01	7.053
TCGA-FD-A6TC-01	7.052
TCGA-06-5856-01	7.052
TCGA-LN-A4A5-01	7.05
TCGA-4Z-AA86-01	7.049
TCGA-2G-AALZ-01	7.049
TCGA-VW-A8FI-01	7.049
TCGA-76-4932-01	7.048
TCGA-MY-A5BF-11	7.045
TCGA-60-2711-01	7.043
TCGA-DX-A8BK-01	7.043
TCGA-E9-A226-01	7.04
TCGA-21-1071-01	7.038
TCGA-BB-8596-01	7.037
TCGA-CF-A1HS-01	7.037
TCGA-CR-7369-01	7.036
TCGA-N6-A4VF-01	7.034
TCGA-C5-A0TN-01	7.034
TCGA-CV-A45Q-01	7.034
TCGA-BH-A0HA-01	7.032
TCGA-EA-A97N-01	7.031
TCGA-CV-A6JN-01	7.031
TCGA-Q1-A5R2-01	7.03
TCGA-85-7844-01	7.029
TCGA-EA-A4BA-01	7.026
TCGA-2Z-A9JM-01	7.026
TCGA-PT-A8TR-01	7.025
TCGA-BH-A18K-01	7.025
TCGA-DX-A3UA-01	7.023
TCGA-CV-6956-01	7.021
TCGA-56-7579-01	7.019
TCGA-EA-A5FO-01	7.018
TCGA-N5-A4RM-01	7.013
TCGA-DK-A1AB-01	7.011
TCGA-04-1655-01	7.01
TCGA-60-2726-01	7.01
TCGA-DW-7834-01	7.01
TCGA-CQ-A4CG-01	7.009
TCGA-FU-A3EO-01	7.008
TCGA-BH-A208-01	7.007
TCGA-FD-A5C1-01	7.004
TCGA-CV-7255-01	7.004
TCGA-YH-A8SY-01	7.004
TCGA-85-6798-01	7.003
TCGA-DX-AB2J-01	7.002
TCGA-CR-7389-01	7.001
TCGA-L5-A88S-01	7.001
TCGA-B9-4115-01	6.999
TCGA-19-2624-01	6.998
TCGA-E9-A22E-01	6.997
TCGA-CQ-5330-01	6.997
TCGA-JX-A3Q8-01	6.995
TCGA-O2-A52V-01	6.995
TCGA-ZF-AA52-01	6.994
TCGA-2G-AALX-01	6.986
TCGA-DQ-7588-01	6.986
TCGA-2G-AALT-01	6.985
TCGA-CV-A6JT-01	6.977
TCGA-K4-A3WV-01	6.976
TCGA-E2-A10E-01	6.975
TCGA-BF-A5EO-01	6.974
TCGA-CV-5444-01	6.973
TCGA-5P-A9JY-01	6.972
TCGA-CN-5366-01	6.971
TCGA-ZF-AA53-01	6.968
TCGA-C5-A2LT-01	6.968
TCGA-RS-A6TO-01	6.967
TCGA-EY-A548-01	6.966
TCGA-CV-7091-01	6.964
TCGA-G7-A8LB-01	6.964
TCGA-P3-A6T7-01	6.962
TCGA-34-5236-01	6.961
TCGA-N7-A4Y5-01	6.958
TCGA-FG-6692-01	6.958
TCGA-D8-A13Z-01	6.957
TCGA-DS-A5RQ-01	6.957
TCGA-DX-A48U-01	6.957
TCGA-Z6-A8JD-01	6.956
TCGA-BH-A0BJ-01	6.955
TCGA-FG-A6J3-01	6.954
TCGA-EM-A3ST-01	6.952
TCGA-3B-A9HY-01	6.949
TCGA-DS-A0VM-01	6.946
TCGA-L5-A4OM-01	6.946
TCGA-DK-A2HX-01	6.945
TCGA-Y8-A898-01	6.945
TCGA-CZ-5468-01	6.944
TCGA-AX-A05Y-11	6.944
TCGA-D6-8568-01	6.939
TCGA-DX-A3LU-01	6.939
TCGA-UC-A7PD-01	6.939
TCGA-EA-A6QX-01	6.938
TCGA-DX-A7EN-01	6.938
TCGA-CV-7252-01	6.937
TCGA-C5-A2M2-01	6.936
TCGA-LN-A49X-01	6.935
TCGA-BH-A0BT-01	6.933
TCGA-WK-A8XS-01	6.932
TCGA-JW-A5VL-01	6.932
TCGA-X6-A7WA-01	6.931
TCGA-LN-A4A2-01	6.928
TCGA-CN-5361-01	6.926
TCGA-3B-A9HR-01	6.926
TCGA-GM-A3NY-01	6.925
TCGA-G2-A2EJ-01	6.925
TCGA-EA-A3HT-01	6.924
TCGA-C5-A902-01	6.923
TCGA-Q1-A73Q-01	6.921
TCGA-BH-A0DV-01	6.92
TCGA-CN-6996-01	6.918
TCGA-N9-A4Q8-01	6.917
TCGA-NA-A4R0-01	6.917
TCGA-K1-A3PO-11	6.916
TCGA-BH-A1EO-01	6.913
TCGA-B1-A654-01	6.91
TCGA-UF-A7JF-01	6.909
TCGA-2G-AAGX-01	6.907
TCGA-VR-A8EU-01	6.905
TCGA-AJ-A3NC-11	6.903
TCGA-NC-A5HM-01	6.902
TCGA-VS-A953-01	6.9
TCGA-14-0787-01	6.9
TCGA-Z6-AAPN-01	6.9
TCGA-IG-A6QS-01	6.895
TCGA-CN-A63U-01	6.893
TCGA-63-A5MH-01	6.89
TCGA-GU-A764-01	6.89
TCGA-CN-A63W-01	6.887
TCGA-D6-A6EN-01	6.886
TCGA-DS-A0VL-01	6.885
TCGA-CV-7261-01	6.885
TCGA-EK-A2RM-01	6.885
TCGA-43-5670-01	6.885
TCGA-CV-6436-01	6.885
TCGA-A2-A04U-01	6.884
TCGA-UY-A9PD-01	6.884
TCGA-KP-A3W3-01	6.884
TCGA-CV-7177-01	6.883
TCGA-AR-A5QQ-01	6.883
TCGA-CV-A6K1-01	6.883
TCGA-CR-7376-01	6.882
TCGA-BI-A20A-01	6.879
TCGA-92-8063-01	6.878
TCGA-LN-A9FR-01	6.878
TCGA-K4-A5RI-01	6.877
TCGA-33-AASJ-01	6.877
TCGA-39-5024-01	6.877
TCGA-6A-AB49-01	6.873
TCGA-C5-A8XH-01	6.872
TCGA-S8-A6BW-01	6.872
TCGA-EA-A3Y4-01	6.872
TCGA-NC-A5HF-01	6.87
TCGA-WT-AB44-01	6.869
TCGA-DW-7837-01	6.869
TCGA-G7-A4TM-01	6.867
TCGA-FX-A3TO-01	6.864
TCGA-UC-A7PG-06	6.864
TCGA-VS-A8EH-01	6.863
TCGA-UF-A71B-01	6.863
TCGA-98-A53J-01	6.863
TCGA-CN-6011-01	6.862
TCGA-AX-A0J0-11	6.86
TCGA-BK-A13B-01	6.859
TCGA-68-7757-01	6.858
TCGA-94-7033-01	6.858
TCGA-37-A5EN-01	6.854
TCGA-33-4587-01	6.853
TCGA-CV-7103-01	6.853
TCGA-A8-A07J-01	6.852
TCGA-CN-4725-01	6.852
TCGA-CQ-A4C6-01	6.851
TCGA-NC-A5HT-01	6.85
TCGA-NK-A5CX-01	6.85
TCGA-E6-A8L9-01	6.848
TCGA-CR-7377-01	6.848
TCGA-DX-A3U6-01	6.848
TCGA-FB-AAPS-01	6.848
TCGA-DX-A7ER-01	6.846
TCGA-EA-A1QT-01	6.846
TCGA-DK-A3IM-01	6.846
TCGA-BH-A18J-01	6.844
TCGA-DF-A2KY-01	6.841
TCGA-CN-5373-01	6.841
TCGA-C5-A7UC-01	6.839
TCGA-NC-A5HD-01	6.838
TCGA-MB-A5YA-01	6.838
TCGA-C5-A907-01	6.838
TCGA-CN-A642-01	6.837
TCGA-3B-A9HU-01	6.836
TCGA-DX-AB2F-01	6.832
TCGA-CN-5355-01	6.832
TCGA-BH-A0DI-01	6.831
TCGA-ZF-AA4R-01	6.831
TCGA-H7-8502-01	6.831
TCGA-BH-A1F2-01	6.83
TCGA-22-4593-01	6.83
TCGA-XF-AAMT-01	6.83
TCGA-CQ-6227-01	6.83
TCGA-CV-5435-01	6.828
TCGA-CV-A45R-01	6.827
TCGA-CN-A49A-01	6.825
TCGA-BH-A0BM-01	6.824
TCGA-QN-A5NN-01	6.823
TCGA-33-4547-01	6.822
TCGA-N7-A59B-01	6.822
TCGA-55-7726-01	6.822
TCGA-D6-6515-01	6.822
TCGA-P3-A6T5-01	6.822
TCGA-37-A5EL-01	6.82
TCGA-VS-A957-01	6.818
TCGA-DI-A1C3-01	6.817
TCGA-A7-A56D-01	6.815
TCGA-C5-A1ME-01	6.813
TCGA-EA-A439-01	6.812
TCGA-BR-A4J4-01	6.811
TCGA-QS-A744-01	6.81
TCGA-CR-7368-01	6.808
TCGA-CN-5364-01	6.804
TCGA-56-8622-01	6.802
TCGA-E9-A1NG-01	6.801
TCGA-B9-A8YH-01	6.801
TCGA-DK-A3IT-01	6.8
TCGA-4Z-AA7W-01	6.799
TCGA-A1-A0SI-01	6.799
TCGA-QK-A6II-01	6.798
TCGA-HS-A5N8-01	6.797
TCGA-E7-A7XN-01	6.797
TCGA-BA-A6DB-01	6.797
TCGA-CR-7401-01	6.797
TCGA-W5-AA34-01	6.795
TCGA-CN-5363-01	6.794
TCGA-C5-A7X3-01	6.794
TCGA-EA-A411-01	6.793
TCGA-F7-A61S-01	6.793
TCGA-GU-AATO-01	6.792
TCGA-BP-5198-01	6.792
TCGA-GD-A3OQ-01	6.791
TCGA-CN-A499-01	6.79
TCGA-CV-7235-01	6.79
TCGA-LN-A7HX-01	6.79
TCGA-CQ-5326-01	6.789
TCGA-BH-A0AZ-01	6.788
TCGA-56-A4BY-01	6.788
TCGA-CN-A49B-01	6.788
TCGA-5V-A9RR-01	6.787
TCGA-N9-A4Q3-01	6.785
TCGA-EW-A1OW-01	6.785
TCGA-HD-7832-01	6.785
TCGA-E9-A1RI-01	6.784
TCGA-EA-A5O9-01	6.783
TCGA-43-6647-01	6.781
TCGA-CV-A464-01	6.779
TCGA-AJ-A3OJ-01	6.778
TCGA-A1-A0SH-01	6.776
TCGA-CR-6471-01	6.775
TCGA-AL-3472-01	6.774
TCGA-A5-A3LO-01	6.773
TCGA-CU-A3KJ-01	6.773
TCGA-DW-7840-01	6.773
TCGA-ZJ-AAXA-01	6.772
TCGA-AX-A3G6-01	6.771
TCGA-SX-A7SL-01	6.771
TCGA-EY-A1GX-01	6.77
TCGA-90-7964-01	6.769
TCGA-OR-A5JO-01	6.769
TCGA-CV-6942-01	6.768
TCGA-BB-7870-01	6.766
TCGA-LN-A49M-01	6.766
TCGA-BH-A0EB-01	6.765
TCGA-BH-A0E6-01	6.765
TCGA-A4-A772-01	6.765
TCGA-GM-A2DA-01	6.764
TCGA-BI-A0VS-01	6.763
TCGA-IB-7885-01	6.761
TCGA-IQ-A61J-01	6.76
TCGA-AC-A3TM-01	6.76
TCGA-A7-A0DA-01	6.76
TCGA-FB-A5VM-01	6.759
TCGA-XE-AAO6-01	6.759
TCGA-CV-6959-01	6.756
TCGA-F7-A61V-01	6.756
TCGA-BH-A0BD-01	6.756
TCGA-CN-6016-01	6.754
TCGA-D6-A6EM-01	6.753
TCGA-TS-A7P3-01	6.753
TCGA-28-5204-01	6.752
TCGA-2J-AABA-01	6.751
TCGA-N5-A4RT-01	6.749
TCGA-C8-A12Y-01	6.749
TCGA-UZ-A9PU-01	6.748
TCGA-N5-A4R8-01	6.747
TCGA-D6-6826-01	6.747
TCGA-XF-A9SX-01	6.747
TCGA-52-7810-01	6.745
TCGA-BA-5149-01	6.744
TCGA-2G-AAH4-01	6.741
TCGA-Q1-A73O-01	6.74
TCGA-BA-6870-01	6.739
TCGA-LP-A4AW-01	6.736
TCGA-L5-A43J-01	6.736
TCGA-FU-A23L-01	6.735
TCGA-EK-A2PL-01	6.733
TCGA-C5-A1M7-01	6.732
TCGA-FD-A3B3-01	6.732
TCGA-AJ-A3NC-01	6.732
TCGA-CV-7095-01	6.731
TCGA-DX-A3UD-01	6.73
TCGA-FL-A1YG-11	6.73
TCGA-A4-7287-01	6.727
TCGA-CV-5432-01	6.727
TCGA-JW-A852-01	6.724
TCGA-MA-AA41-01	6.723
TCGA-EK-A2RK-01	6.722
TCGA-DK-A1AG-01	6.721
TCGA-EA-A50E-01	6.721
TCGA-70-6722-01	6.72
TCGA-19-2619-01	6.72
TCGA-2Z-A9J6-01	6.719
TCGA-BR-A453-01	6.718
TCGA-92-7340-01	6.717
TCGA-MU-A5YI-01	6.717
TCGA-56-8503-01	6.716
TCGA-NC-A5HH-01	6.714
TCGA-B9-5155-01	6.714
TCGA-58-8386-01	6.713
TCGA-SJ-A6ZJ-01	6.713
TCGA-XV-A9W5-01	6.71
TCGA-5P-A9KF-01	6.71
TCGA-DX-A8BJ-01	6.709
TCGA-77-8145-01	6.708
TCGA-BT-A20U-01	6.707
TCGA-TN-A7HI-01	6.706
TCGA-C5-A7CJ-01	6.706
TCGA-N9-A4Q1-01	6.705
TCGA-MU-A8JM-01	6.705
TCGA-EY-A549-01	6.704
TCGA-CN-A498-01	6.704
TCGA-HZ-A77P-01	6.704
TCGA-UY-A78P-01	6.703
TCGA-IB-A5SQ-01	6.703
TCGA-21-1072-01	6.702
TCGA-XF-AAN3-01	6.702
TCGA-DS-A7WF-01	6.701
TCGA-ZJ-AAXD-01	6.701
TCGA-KU-A6H7-01	6.7
TCGA-CR-7379-01	6.7
TCGA-VR-AA4G-01	6.699
TCGA-HZ-7925-01	6.697
TCGA-CV-7438-01	6.696
TCGA-AQ-A54N-01	6.696
TCGA-P3-A5QF-01	6.694
TCGA-EE-A2A0-06	6.694
TCGA-BF-A3DN-01	6.694
TCGA-DG-A2KL-01	6.693
TCGA-HD-A6I0-01	6.692
TCGA-C5-A8XI-01	6.691
TCGA-AJ-A3I9-01	6.689
TCGA-PC-A5DP-01	6.689
TCGA-E2-A1L9-01	6.688
TCGA-HZ-A77Q-01	6.688
TCGA-CN-5367-01	6.687
TCGA-BT-A42E-01	6.685
TCGA-CN-6018-01	6.685
TCGA-N5-A4RD-01	6.683
TCGA-2J-AAB8-01	6.682
TCGA-CV-6952-01	6.682
TCGA-SX-A7SP-01	6.682
TCGA-S9-A7IS-01	6.681
TCGA-XF-AAMR-01	6.681
TCGA-AO-A126-01	6.68
TCGA-EK-A2H0-01	6.68
TCGA-FD-A6TD-01	6.679
TCGA-44-7660-01	6.678
TCGA-FD-A3SO-01	6.677
TCGA-A7-A6VW-01	6.676
TCGA-IF-A4AJ-01	6.674
TCGA-2F-A9KR-01	6.673
TCGA-DX-A240-01	6.673
TCGA-77-7138-01	6.673
TCGA-P4-A5E7-01	6.672
TCGA-FL-A1YI-11	6.672
TCGA-B1-A47N-01	6.67
TCGA-CN-6989-01	6.669
TCGA-60-2713-01	6.667
TCGA-DJ-A2Q9-01	6.667
TCGA-85-6175-01	6.666
TCGA-CV-6961-01	6.665
TCGA-D6-6517-01	6.665
TCGA-98-A538-01	6.664
TCGA-NK-A5D1-01	6.664
TCGA-EK-A2PK-01	6.663
TCGA-VS-A94X-01	6.662
TCGA-WA-A7GZ-01	6.662
TCGA-SL-A6JA-01	6.661
TCGA-E2-A1IN-01	6.661
TCGA-LK-A4O6-01	6.661
TCGA-E6-A2P9-01	6.66
TCGA-NK-A5CR-01	6.659
TCGA-BR-A4IV-01	6.659
TCGA-UZ-A9PR-01	6.659
TCGA-DX-A8BM-01	6.658
TCGA-ER-A196-01	6.657
TCGA-D8-A1JE-01	6.657
TCGA-77-7139-01	6.656
TCGA-A2-A0CP-01	6.654
TCGA-EW-A1IY-01	6.653
TCGA-BH-A0W3-01	6.653
TCGA-DK-A1A5-01	6.652
TCGA-HD-7229-01	6.651
TCGA-PC-A5DK-01	6.651
TCGA-RD-A8N2-01	6.65
TCGA-DX-A1L3-01	6.649
TCGA-C5-A1BJ-01	6.649
TCGA-DT-5265-01	6.648
TCGA-77-8153-01	6.646
TCGA-EA-A5ZF-01	6.645
TCGA-A5-A2K5-01	6.645
TCGA-MA-AA3W-01	6.644
TCGA-22-5482-01	6.644
TCGA-BH-A0DQ-01	6.64
TCGA-FD-A3SN-01	6.64
TCGA-CQ-A4C7-01	6.639
TCGA-A7-A5ZW-01	6.639
TCGA-B0-4842-01	6.638
TCGA-MN-A4N4-01	6.637
TCGA-2G-AAGY-01	6.637
TCGA-BH-A1FM-01	6.636
TCGA-DX-A6YU-01	6.636
TCGA-P4-A5E6-01	6.636
TCGA-ZJ-A8QR-01	6.635
TCGA-T2-A6X0-01	6.634
TCGA-BH-A0B5-01	6.632
TCGA-GM-A2DL-01	6.632
TCGA-BH-A0BR-01	6.632
TCGA-EK-A2RJ-01	6.632
TCGA-GU-A42Q-01	6.631
TCGA-IQ-A61I-01	6.629
TCGA-60-2722-01	6.628
TCGA-06-0190-02	6.628
TCGA-46-6026-01	6.627
TCGA-CV-A468-01	6.627
TCGA-HB-A5W3-01	6.627
TCGA-E2-A1B4-01	6.627
TCGA-CN-A6V7-01	6.626
TCGA-33-4533-01	6.625
TCGA-AJ-A3OL-01	6.624
TCGA-DK-A3IN-01	6.624
TCGA-CV-5976-01	6.622
TCGA-JW-AAVH-01	6.62
TCGA-UZ-A9PS-01	6.62
TCGA-IR-A3LI-01	6.618
TCGA-CR-7364-01	6.618
TCGA-CN-5365-01	6.617
TCGA-HS-A5N7-01	6.617
TCGA-EB-A299-01	6.616
TCGA-B6-A0IB-01	6.615
TCGA-UZ-A9Q0-01	6.615
TCGA-06-0878-01	6.613
TCGA-D6-A74Q-01	6.612
TCGA-46-3767-01	6.612
TCGA-EA-A556-01	6.611
TCGA-68-A59I-01	6.611
TCGA-33-4586-01	6.61
TCGA-V5-AASV-01	6.61
TCGA-BH-A1EX-01	6.608
TCGA-56-7731-01	6.607
TCGA-E2-A1L8-01	6.606
TCGA-CQ-6219-01	6.605
TCGA-AR-A1AR-01	6.605
TCGA-UY-A9PB-01	6.604
TCGA-PJ-A5Z9-01	6.604
TCGA-56-A4BW-01	6.603
TCGA-AJ-A3NE-11	6.602
TCGA-28-5209-01	6.601
TCGA-AQ-A54O-01	6.601
TCGA-C9-A480-01	6.6
TCGA-CN-6020-01	6.6
TCGA-GC-A3I6-01	6.599
TCGA-D8-A1JU-01	6.599
TCGA-ZF-AA5N-01	6.599
TCGA-ER-A195-06	6.598
TCGA-CR-5247-01	6.598
TCGA-56-7222-01	6.596
TCGA-DQ-5625-01	6.596
TCGA-BB-A5HU-01	6.596
TCGA-VS-A9UH-01	6.595
TCGA-CQ-5327-01	6.595
TCGA-2Z-A9J1-01	6.595
TCGA-DX-AATS-01	6.594
TCGA-MT-A67D-01	6.594
TCGA-QF-A5YS-01	6.593
TCGA-LI-A9QH-01	6.591
TCGA-VS-A959-01	6.59
TCGA-CM-5861-01	6.589
TCGA-UF-A7JJ-01	6.588
TCGA-F7-A620-01	6.587
TCGA-EK-A3GN-01	6.584
TCGA-RL-AAAS-01	6.584
TCGA-EX-A3L1-01	6.583
TCGA-SC-A6LN-01	6.583
TCGA-CV-A6K0-01	6.582
TCGA-OR-A5J8-01	6.581
TCGA-WK-A8XZ-01	6.581
TCGA-CV-A6K2-01	6.581
TCGA-CV-7410-01	6.58
TCGA-B6-A0X7-01	6.577
TCGA-CQ-7068-01	6.577
TCGA-CR-7397-01	6.577
TCGA-21-1079-01	6.577
TCGA-LP-A4AU-01	6.577
TCGA-39-5019-01	6.576
TCGA-N5-A4RJ-01	6.575
TCGA-FB-AAQ3-01	6.575
TCGA-BH-A0DX-01	6.574
TCGA-AX-A3FS-01	6.574
TCGA-CQ-7067-01	6.573
TCGA-LN-A9FP-01	6.573
TCGA-33-AAS8-01	6.572
TCGA-CV-A463-01	6.572
TCGA-56-8628-01	6.571
TCGA-AC-A2QJ-01	6.571
TCGA-B5-A3F9-01	6.571
TCGA-EY-A54A-01	6.571
TCGA-BA-4078-01	6.57
TCGA-A2-A0YM-01	6.57
TCGA-XD-AAUG-01	6.57
TCGA-85-8481-01	6.569
TCGA-DX-A1L0-01	6.569
TCGA-NC-A5HP-01	6.569
TCGA-JV-A5VE-01	6.569
TCGA-GM-A2D9-01	6.568
TCGA-A5-A2K7-01	6.567
TCGA-AR-A24T-01	6.567
TCGA-CU-A0YN-11	6.567
TCGA-CQ-6228-01	6.565
TCGA-E2-A15D-01	6.565
TCGA-MT-A51X-01	6.564
TCGA-KV-A6GE-01	6.564
TCGA-PC-A5DN-01	6.563
TCGA-EO-A1Y7-01	6.563
TCGA-L5-A4OQ-11	6.563
TCGA-G4-6302-01	6.563
TCGA-2G-AAGV-01	6.562
TCGA-CQ-6229-01	6.562
TCGA-IB-7893-01	6.562
TCGA-EV-5903-01	6.562
TCGA-CR-7398-01	6.561
TCGA-2G-AALN-01	6.561
TCGA-OR-A5LE-01	6.561
TCGA-86-8074-01	6.56
TCGA-MQ-A6BN-01	6.56
TCGA-FU-A3EO-11	6.56
TCGA-FD-A3B7-01	6.556
TCGA-AZ-6605-11	6.556
TCGA-EO-A3L0-01	6.555
TCGA-BH-A0BL-01	6.555
TCGA-SY-A9G5-01	6.555
TCGA-EX-A69M-01	6.554
TCGA-MT-A67F-01	6.554
TCGA-AO-A0J5-01	6.553
TCGA-IG-A3YA-01	6.553
TCGA-CQ-5323-01	6.553
TCGA-85-A4CN-01	6.551
TCGA-K4-A4AB-01	6.548
TCGA-CN-A63V-01	6.548
TCGA-DS-A3LQ-01	6.547
TCGA-2Z-A9JR-01	6.546
TCGA-E9-A6HE-01	6.544
TCGA-SC-AA5Z-01	6.544
TCGA-IA-A83T-01	6.544
TCGA-IG-A3Y9-01	6.543
TCGA-VS-A94Z-01	6.542
TCGA-JW-A5VI-01	6.542
TCGA-E2-A1B1-01	6.542
TCGA-SX-A7SR-01	6.541
TCGA-C5-A905-01	6.54
TCGA-XF-AAN8-01	6.54
TCGA-E9-A1NH-01	6.539
TCGA-IZ-A6M8-01	6.538
TCGA-F7-8489-01	6.537
TCGA-BR-A4IZ-01	6.537
TCGA-G4-6310-01	6.537
TCGA-EK-A2R7-01	6.536
TCGA-E2-A1BC-01	6.536
TCGA-DX-A3U5-01	6.536
TCGA-EA-A44S-01	6.536
TCGA-KD-A5QU-01	6.535
TCGA-56-7582-01	6.535
TCGA-CV-7104-01	6.535
TCGA-D6-8569-01	6.534
TCGA-L5-A8NK-01	6.534
TCGA-J4-A67Q-01	6.533
TCGA-SI-A71Q-01	6.532
TCGA-C5-A2LX-01	6.532
TCGA-QQ-A8VB-01	6.531
TCGA-BA-5558-01	6.531
TCGA-AX-A2HC-11	6.531
TCGA-CQ-A4CD-01	6.529
TCGA-E9-A229-01	6.529
TCGA-VR-AA7I-01	6.529
TCGA-5K-AAAP-01	6.527
TCGA-51-6867-01	6.527
TCGA-28-5218-01	6.527
TCGA-A2-A25A-01	6.527
TCGA-A8-A097-01	6.526
TCGA-BH-A1ET-01	6.526
TCGA-DK-AA6M-01	6.524
TCGA-CN-A6V6-01	6.523
TCGA-CV-7416-01	6.523
TCGA-XF-AAMJ-01	6.523
TCGA-XE-AAOC-01	6.522
TCGA-06-2564-01	6.522
TCGA-SX-A71U-01	6.522
TCGA-UF-A71A-01	6.521
TCGA-CR-7390-01	6.521
TCGA-EL-A3MX-01	6.52
TCGA-A2-A0T4-01	6.518
TCGA-D3-A3C1-06	6.517
TCGA-5P-A9JU-01	6.517
TCGA-CV-7440-01	6.516
TCGA-CN-5370-01	6.516
TCGA-C5-A2LS-01	6.515
TCGA-ND-A4WF-01	6.515
TCGA-56-7730-01	6.515
TCGA-EK-A2RE-01	6.515
TCGA-SX-A7SU-01	6.515
TCGA-AC-A23G-01	6.514
TCGA-DQ-7591-01	6.513
TCGA-G3-A25X-01	6.513
TCGA-2G-AAL5-01	6.511
TCGA-CN-A63T-01	6.51
TCGA-A8-A07G-01	6.509
TCGA-ER-A2NC-06	6.509
TCGA-JX-A3PZ-01	6.509
TCGA-2G-AAM3-01	6.507
TCGA-DX-A3U7-01	6.505
TCGA-AX-A3FV-01	6.504
TCGA-MA-AA42-01	6.502
TCGA-DX-A8BV-01	6.501
TCGA-C8-A138-01	6.5
TCGA-A2-A0EO-01	6.499
TCGA-NC-A5HO-01	6.499
TCGA-SX-A7SN-01	6.499
TCGA-AJ-A3EM-01	6.498
TCGA-LN-A4A6-01	6.498
TCGA-VQ-A94P-01	6.498
TCGA-D8-A143-01	6.496
TCGA-IB-7890-01	6.496
TCGA-2Z-A9J7-01	6.494
TCGA-85-8350-01	6.493
TCGA-EY-A2OO-01	6.492
TCGA-AC-A3HN-01	6.491
TCGA-E2-A15L-01	6.49
TCGA-3B-A9HP-01	6.49
TCGA-94-A5I6-01	6.489
TCGA-XF-A9SU-01	6.489
TCGA-HZ-8001-01	6.489
TCGA-DK-A2I6-01	6.487
TCGA-EE-A20I-06	6.487
TCGA-58-A46N-01	6.484
TCGA-CR-6492-01	6.484
TCGA-DX-A7EM-01	6.484
TCGA-85-A4CL-01	6.483
TCGA-E2-A15I-01	6.483
TCGA-AO-A125-01	6.483
TCGA-CN-4734-01	6.483
TCGA-66-2789-01	6.482
TCGA-A7-A5ZX-01	6.482
TCGA-CV-7446-01	6.481
TCGA-3B-A9HO-01	6.481
TCGA-DF-A2KV-01	6.481
TCGA-FD-A3N5-01	6.48
TCGA-CV-7435-01	6.479
TCGA-P4-AAVL-01	6.479
TCGA-43-8118-01	6.478
TCGA-DX-A3LY-01	6.477
TCGA-EW-A1PG-01	6.475
TCGA-IB-AAUS-01	6.475
TCGA-X6-A7WB-01	6.475
TCGA-SX-A71W-01	6.475
TCGA-AJ-A3NF-01	6.475
TCGA-63-7020-01	6.473
TCGA-BA-A6DJ-01	6.473
TCGA-LP-A4AX-01	6.472
TCGA-DW-7841-01	6.472
TCGA-J2-A4AG-01	6.471
TCGA-CV-6951-01	6.471
TCGA-QQ-A5V9-01	6.471
TCGA-FU-A3HY-01	6.469
TCGA-DX-A1KU-01	6.468
TCGA-AR-A24O-01	6.468
TCGA-A4-A7UZ-01	6.468
TCGA-55-8204-01	6.467
TCGA-AC-A3TN-01	6.467
TCGA-B0-4844-01	6.466
TCGA-21-5784-01	6.465
TCGA-QS-A5YR-01	6.465
TCGA-GV-A40G-01	6.463
TCGA-SH-A7BH-01	6.463
TCGA-MT-A67A-01	6.462
TCGA-DX-A6BB-01	6.462
TCGA-NF-A4X2-01	6.461
TCGA-DX-A8BX-01	6.46
TCGA-CX-7082-01	6.459
TCGA-AJ-A5DV-01	6.458
TCGA-GN-A8LN-01	6.457
TCGA-56-7823-01	6.456
TCGA-VN-A88I-01	6.456
TCGA-DX-A2J1-01	6.456
TCGA-C5-A7CO-01	6.456
TCGA-UC-A7PF-01	6.455
TCGA-ZJ-A8QQ-01	6.454
TCGA-E7-A3X6-01	6.453
TCGA-3A-A9IC-01	6.453
TCGA-BH-A0E2-01	6.45
TCGA-C5-A7CK-01	6.45
TCGA-CV-6940-01	6.45
TCGA-US-A77E-01	6.45
TCGA-AX-A2IN-01	6.449
TCGA-CR-7404-01	6.449
TCGA-CV-7430-01	6.449
TCGA-A2-A04P-01	6.449
TCGA-ET-A3BV-01	6.449
TCGA-AR-A24M-01	6.449
TCGA-XV-AAZW-01	6.449
TCGA-LN-A9FO-01	6.447
TCGA-VS-A8Q9-01	6.447
TCGA-CN-5369-01	6.447
TCGA-B9-A5W7-01	6.447
TCGA-L3-A4E7-01	6.446
TCGA-W6-AA0S-01	6.446
TCGA-BH-A8FY-01	6.446
TCGA-85-7698-01	6.445
TCGA-BH-A1FG-11	6.444
TCGA-EB-A550-01	6.444
TCGA-EA-A3HS-01	6.443
TCGA-TS-A7OU-01	6.443
TCGA-RS-A6TP-01	6.442
TCGA-DX-A6YT-01	6.442
TCGA-B9-4114-01	6.441
TCGA-CV-7100-01	6.44
TCGA-5B-A90C-01	6.439
TCGA-AJ-A23N-01	6.439
TCGA-H4-A2HQ-01	6.438
TCGA-IF-A4AK-01	6.438
TCGA-D8-A1XB-01	6.437
TCGA-4A-A93W-01	6.437
TCGA-BA-5153-01	6.436
TCGA-CQ-A4CB-01	6.435
TCGA-C8-A137-01	6.434
TCGA-DI-A1BU-01	6.434
TCGA-C5-A1MF-01	6.432
TCGA-CQ-A4C9-01	6.432
TCGA-A4-7732-01	6.432
TCGA-C5-A1BL-01	6.431
TCGA-EY-A5W2-01	6.431
TCGA-FU-A3WB-01	6.43
TCGA-VS-A9U7-01	6.429
TCGA-GC-A3OO-01	6.429
TCGA-85-A4JC-01	6.427
TCGA-CV-7178-01	6.427
TCGA-N8-A4PO-01	6.426
TCGA-B9-4113-01	6.426
TCGA-CV-5978-01	6.425
TCGA-HV-A5A3-11	6.425
TCGA-A2-A0CS-01	6.424
TCGA-55-8299-01	6.423
TCGA-CN-A49C-01	6.423
TCGA-HV-AA8V-01	6.423
TCGA-CV-A6JO-01	6.422
TCGA-CV-5442-01	6.422
TCGA-A1-A0SF-01	6.421
TCGA-ER-A19D-06	6.421
TCGA-XF-A9T8-01	6.421
TCGA-D8-A141-01	6.42
TCGA-YF-AA3L-01	6.42
TCGA-2L-AAQE-01	6.42
TCGA-SG-A6Z7-01	6.418
TCGA-MY-A5BE-01	6.418
TCGA-43-7657-01	6.418
TCGA-K1-A42W-01	6.418
TCGA-A8-A08Z-01	6.417
TCGA-2Z-A9JS-01	6.417
TCGA-C8-A1HN-01	6.416
TCGA-2G-AALG-01	6.416
TCGA-AJ-A8CV-01	6.416
TCGA-T3-A92M-01	6.415
TCGA-BH-A0W7-01	6.414
TCGA-HI-7169-01	6.414
TCGA-85-8288-01	6.414
TCGA-K1-A3PN-01	6.414
TCGA-56-8624-01	6.413
TCGA-CQ-6220-01	6.413
TCGA-B5-A3FA-01	6.412
TCGA-BG-A3EW-01	6.412
TCGA-BH-A0B0-01	6.412
TCGA-2J-AABU-01	6.412
TCGA-IA-A40Y-01	6.412
TCGA-A2-A0T7-01	6.411
TCGA-KU-A6H7-06	6.411
TCGA-B0-5100-01	6.411
TCGA-BH-A1FJ-11	6.41
TCGA-22-5478-01	6.409
TCGA-77-8139-01	6.409
TCGA-N1-A6IA-01	6.409
TCGA-CV-A460-01	6.408
TCGA-14-1034-01	6.406
TCGA-CV-7432-01	6.405
TCGA-22-1012-01	6.403
TCGA-90-7769-01	6.403
TCGA-B6-A0IH-01	6.402
TCGA-D6-A4ZB-01	6.4
TCGA-CD-A489-01	6.4
TCGA-77-7140-01	6.399
TCGA-EK-A2RB-01	6.399
TCGA-3G-AB0Q-01	6.398
TCGA-55-7281-01	6.398
TCGA-66-2780-01	6.398
TCGA-C8-A12L-01	6.398
TCGA-2Z-A9JE-01	6.398
TCGA-43-6771-01	6.397
TCGA-Y8-A897-01	6.396
TCGA-FL-A1YQ-11	6.396
TCGA-D6-6823-01	6.395
TCGA-CN-4738-01	6.395
TCGA-MA-AA3Y-01	6.395
TCGA-H6-8124-11	6.395
TCGA-G4-6298-01	6.394
TCGA-FP-8209-01	6.394
TCGA-CR-6493-01	6.393
TCGA-ZH-A8Y5-01	6.393
TCGA-XF-AAN4-01	6.392
TCGA-O9-A75Z-01	6.392
TCGA-5L-AAT0-01	6.391
TCGA-27-1837-01	6.391
TCGA-E2-A15K-11	6.391
TCGA-XF-AAME-01	6.391
TCGA-77-8133-01	6.39
TCGA-UY-A78L-01	6.389
TCGA-B3-A6W5-01	6.387
TCGA-BH-A0C1-01	6.386
TCGA-EW-A2FR-01	6.386
TCGA-CD-A4MI-01	6.386
TCGA-BH-A201-01	6.386
TCGA-IQ-A6SG-01	6.386
TCGA-CN-A6UY-01	6.385
TCGA-A8-A08O-01	6.385
TCGA-G9-6347-01	6.384
TCGA-DX-A7ES-01	6.384
TCGA-TS-A7OY-01	6.384
TCGA-2Z-A9J3-01	6.384
TCGA-68-7756-01	6.383
TCGA-B5-A3FD-01	6.383
TCGA-CJ-5679-01	6.383
TCGA-3A-A9IB-01	6.383
TCGA-MH-A856-01	6.382
TCGA-AR-A24L-01	6.382
TCGA-FD-A3N6-01	6.381
TCGA-CF-A9FL-01	6.381
TCGA-E1-A7YD-01	6.381
TCGA-2L-AAQL-01	6.38
TCGA-B9-4617-01	6.38
TCGA-X9-A971-01	6.379
TCGA-B6-A0WZ-01	6.379
TCGA-ER-A42K-06	6.379
TCGA-BH-A0DE-01	6.378
TCGA-BB-A5HY-01	6.378
TCGA-AO-A0J8-01	6.378
TCGA-UZ-A9PL-01	6.378
TCGA-MA-AA43-01	6.377
TCGA-XM-A8RF-01	6.376
TCGA-63-5131-01	6.376
TCGA-BH-A0AV-01	6.376
TCGA-CX-A4AQ-01	6.376
TCGA-4J-AA1J-01	6.374
TCGA-D3-A1Q8-06	6.374
TCGA-5S-A9Q8-01	6.374
TCGA-UT-A97Y-01	6.374
TCGA-C8-A273-01	6.374
TCGA-C5-A3HL-01	6.372
TCGA-AX-A3G8-01	6.372
TCGA-07-0249-20	6.372
TCGA-XS-A8TJ-01	6.371
TCGA-D7-A747-01	6.371
TCGA-MT-A51W-01	6.369
TCGA-D8-A27H-01	6.368
TCGA-CJ-6030-01	6.368
TCGA-OR-A5LG-01	6.368
TCGA-UD-AABZ-01	6.368
TCGA-W3-A825-06	6.367
TCGA-CV-7424-01	6.367
TCGA-G9-6496-11	6.366
TCGA-ZG-A9L9-01	6.364
TCGA-77-8150-01	6.364
TCGA-EK-A2IR-01	6.363
TCGA-77-7142-01	6.363
TCGA-63-A5MM-01	6.363
TCGA-V5-A7RC-01	6.363
TCGA-Q3-AA2A-01	6.363
TCGA-77-A5GF-01	6.363
TCGA-CV-7089-01	6.363
TCGA-QK-A8ZA-01	6.361
TCGA-N6-A4VD-01	6.36
TCGA-FL-A1YL-11	6.359
TCGA-55-7815-01	6.357
TCGA-B5-A11R-01	6.357
TCGA-91-6847-01	6.356
TCGA-E2-A14V-01	6.356
TCGA-DK-AA6R-01	6.356
TCGA-C5-A2LY-01	6.356
TCGA-34-8454-01	6.355
TCGA-BH-A0GZ-01	6.355
TCGA-UF-A71E-01	6.354
TCGA-BT-A20W-11	6.354
TCGA-EX-A1H6-01	6.354
TCGA-ZJ-AAXB-01	6.352
TCGA-A2-A3KC-01	6.352
TCGA-EA-A3HU-01	6.352
TCGA-EB-A3HV-01	6.352
TCGA-85-8666-01	6.351
TCGA-FD-A3SP-01	6.351
TCGA-CV-7253-01	6.351
TCGA-85-8351-01	6.35
TCGA-PG-A917-01	6.35
TCGA-DK-AA75-01	6.35
TCGA-FG-A70Z-01	6.349
TCGA-78-7535-01	6.348
TCGA-KO-8404-01	6.348
TCGA-BQ-5890-01	6.348
TCGA-EJ-AB20-01	6.347
TCGA-33-4538-01	6.346
TCGA-19-1389-02	6.346
TCGA-AP-A3K1-01	6.346
TCGA-2G-AALQ-01	6.345
TCGA-FI-A3PX-01	6.345
TCGA-IR-A3LK-01	6.342
TCGA-XU-A92Z-01	6.341
TCGA-SN-A84W-01	6.341
TCGA-EK-A2RC-01	6.341
TCGA-CR-6473-01	6.34
TCGA-FD-A5BZ-01	6.34
TCGA-AO-A0JJ-01	6.34
TCGA-AL-7173-01	6.34
TCGA-BH-A0DL-01	6.339
TCGA-UF-A7JD-01	6.339
TCGA-T2-A6X2-01	6.339
TCGA-IG-A3I8-11	6.339
TCGA-IE-A6BZ-01	6.338
TCGA-98-A539-01	6.338
TCGA-FS-A1ZN-01	6.338
TCGA-OL-A66K-01	6.337
TCGA-BH-A1FH-01	6.337
TCGA-P3-A6T4-01	6.337
TCGA-ZX-AA5X-01	6.337
TCGA-CR-7395-01	6.337
TCGA-EO-A3AS-01	6.337
TCGA-B5-A1MW-01	6.337
TCGA-77-8128-01	6.336
TCGA-21-5782-01	6.336
TCGA-CV-7428-01	6.336
TCGA-AN-A0FS-01	6.336
TCGA-44-6774-01	6.335
TCGA-D8-A1X5-01	6.333
TCGA-D1-A3DG-01	6.333
TCGA-BH-A0BQ-01	6.333
TCGA-EO-A3AU-01	6.332
TCGA-YB-A89D-11	6.332
TCGA-A1-A0SM-01	6.331
TCGA-62-A46O-01	6.331
TCGA-D8-A1XY-01	6.33
TCGA-DX-A3UF-01	6.33
TCGA-A4-7828-01	6.33
TCGA-JX-A3Q0-01	6.33
TCGA-55-7724-01	6.329
TCGA-85-7697-01	6.329
TCGA-DK-A3WX-01	6.328
TCGA-GM-A2DB-01	6.327
TCGA-22-4605-01	6.326
TCGA-85-A511-01	6.326
TCGA-BH-A0HK-11	6.325
TCGA-4X-A9FA-01	6.324
TCGA-22-5471-01	6.324
TCGA-CR-7392-01	6.324
TCGA-B6-A0RN-01	6.324
TCGA-CV-7243-01	6.324
TCGA-BQ-7046-01	6.324
TCGA-GM-A3XN-01	6.323
TCGA-XD-AAUI-01	6.323
TCGA-CQ-5334-01	6.322
TCGA-GN-A263-01	6.322
TCGA-HM-A3JJ-11	6.322
TCGA-97-A4M6-01	6.321
TCGA-TM-A7C3-01	6.321
TCGA-LK-A4NY-01	6.321
TCGA-LL-A50Y-01	6.32
TCGA-71-8520-01	6.32
TCGA-P3-A5Q5-01	6.32
TCGA-AL-A5DJ-01	6.32
TCGA-EK-A2PM-01	6.32
TCGA-BI-A0VR-01	6.319
TCGA-21-5783-01	6.319
TCGA-Q1-A73R-01	6.318
TCGA-CN-4728-01	6.318
TCGA-XF-A8HE-01	6.318
TCGA-UY-A78M-01	6.318
TCGA-XU-A92V-01	6.317
TCGA-EY-A72D-01	6.317
TCGA-18-4083-01	6.317
TCGA-CU-A0YN-01	6.317
TCGA-D8-A146-01	6.316
TCGA-C5-A1BQ-01	6.313
TCGA-EM-A3FQ-01	6.312
TCGA-YC-A9TC-01	6.311
TCGA-2J-AABT-01	6.311
TCGA-56-5898-01	6.31
TCGA-MJ-A850-01	6.308
TCGA-EW-A1J2-01	6.308
TCGA-B6-A0I1-01	6.308
TCGA-CR-5250-01	6.307
TCGA-RD-A8N4-01	6.307
TCGA-XF-AAMW-01	6.306
TCGA-LK-A4O7-01	6.306
TCGA-K6-A3WQ-01	6.305
TCGA-A7-A5ZV-01	6.305
TCGA-IR-A3LH-01	6.305
TCGA-IB-7887-01	6.305
TCGA-E2-A153-01	6.304
TCGA-86-8673-01	6.303
TCGA-4H-AAAK-01	6.302
TCGA-Q1-A6DT-01	6.302
TCGA-CN-4729-01	6.301
TCGA-B0-5707-01	6.301
TCGA-A8-A093-01	6.3
TCGA-BA-5555-01	6.299
TCGA-N5-A4RA-01	6.299
TCGA-FU-A57G-01	6.298
TCGA-CV-6943-01	6.297
TCGA-34-5928-01	6.296
TCGA-G3-A7M6-01	6.296
TCGA-FD-A5C0-01	6.294
TCGA-VR-A8EO-01	6.293
TCGA-22-4595-01	6.293
TCGA-HD-A633-01	6.293
TCGA-IE-A3OV-01	6.293
TCGA-BK-A4ZD-11	6.293
TCGA-P3-A6T6-01	6.292
TCGA-06-2559-01	6.292
TCGA-AR-A1AH-01	6.291
TCGA-A7-A6VY-01	6.29
TCGA-C5-A2LZ-01	6.29
TCGA-N9-A4PZ-01	6.289
TCGA-UF-A7JO-01	6.289
TCGA-ER-A19B-06	6.289
TCGA-21-5787-01	6.289
TCGA-CV-7437-01	6.288
TCGA-4Z-AA82-01	6.288
TCGA-HZ-8002-01	6.287
TCGA-19-2625-01	6.287
TCGA-2G-AALO-01	6.287
TCGA-QK-AA3J-01	6.286
TCGA-CV-A45Z-01	6.285
TCGA-DZ-6133-01	6.284
TCGA-94-7557-01	6.283
TCGA-KU-A66T-01	6.283
TCGA-55-7910-01	6.282
TCGA-UZ-A9PK-01	6.281
TCGA-LI-A67I-01	6.28
TCGA-5N-A9KI-01	6.28
TCGA-FS-A1ZD-06	6.28
TCGA-XJ-A9DX-01	6.279
TCGA-VQ-AA69-01	6.279
TCGA-YF-AA3M-01	6.279
TCGA-15-0742-01	6.278
TCGA-AC-A62Y-01	6.277
TCGA-N5-A59F-01	6.277
TCGA-YB-A89D-01	6.277
TCGA-DM-A1D7-01	6.276
TCGA-BH-A0DS-01	6.275
TCGA-G7-7502-01	6.275
TCGA-E9-A5FL-01	6.273
TCGA-A7-A4SE-01	6.273
TCGA-64-1681-01	6.272
TCGA-BA-5556-01	6.272
TCGA-22-1000-01	6.272
TCGA-BT-A20P-01	6.272
TCGA-EK-A2RL-01	6.271
TCGA-CF-A5UA-01	6.271
TCGA-GN-A262-06	6.271
TCGA-E9-A1RD-01	6.27
TCGA-OR-A5KV-01	6.27
TCGA-C5-A1M8-01	6.27
TCGA-IF-A3RQ-01	6.269
TCGA-DX-A7EQ-01	6.268
TCGA-D3-A51R-06	6.268
TCGA-LA-A446-01	6.268
TCGA-56-8308-01	6.268
TCGA-34-7107-01	6.268
TCGA-76-4928-01	6.268
TCGA-EW-A423-01	6.267
TCGA-EK-A2R8-01	6.266
TCGA-BQ-5891-01	6.265
TCGA-BH-A0B7-01	6.264
TCGA-DX-A6BF-01	6.264
TCGA-C5-A1M5-01	6.264
TCGA-DX-A7EO-01	6.263
TCGA-BT-A3PJ-01	6.263
TCGA-DX-AB2T-01	6.262
TCGA-98-A53A-01	6.262
TCGA-ZJ-AAXJ-01	6.261
TCGA-JY-A6FD-01	6.261
TCGA-CV-7099-01	6.261
TCGA-34-2596-01	6.261
TCGA-GU-AATQ-01	6.26
TCGA-CF-A3MH-01	6.259
TCGA-BH-A5J0-01	6.259
TCGA-CR-7372-01	6.259
TCGA-DX-A23V-01	6.257
TCGA-A4-8311-01	6.256
TCGA-E2-A1LE-01	6.255
TCGA-HD-A6I0-11	6.255
TCGA-D8-A27T-01	6.254
TCGA-HV-A5A6-01	6.253
TCGA-EW-A424-01	6.253
TCGA-3A-A9J0-01	6.253
TCGA-BP-5175-01	6.253
TCGA-2Z-A9J5-01	6.253
TCGA-C4-A0F0-01	6.252
TCGA-NG-A4VW-01	6.251
TCGA-A2-A0CR-01	6.251
TCGA-QS-A5YQ-01	6.251
TCGA-GL-A9DD-01	6.251
TCGA-LL-A5YL-01	6.25
TCGA-3A-A9I5-01	6.25
TCGA-NA-A4QY-01	6.249
TCGA-Y8-A8RY-01	6.249
TCGA-AC-A3YI-01	6.248
TCGA-CR-7388-01	6.248
TCGA-E2-A14Q-01	6.248
TCGA-CV-A465-01	6.248
TCGA-3M-AB46-01	6.248
TCGA-A4-8515-01	6.248
TCGA-MO-A47P-01	6.246
TCGA-DX-A23T-01	6.245
TCGA-HZ-7919-01	6.245
TCGA-4P-AA8J-01	6.244
TCGA-CN-6013-01	6.244
TCGA-LL-A5YP-01	6.242
TCGA-E2-A15K-01	6.241
TCGA-A2-A0ES-01	6.241
TCGA-66-2768-01	6.241
TCGA-CZ-5469-01	6.24
TCGA-IR-A3LF-01	6.239
TCGA-BH-A1EU-01	6.239
TCGA-DX-A6BH-01	6.239
TCGA-VR-A8Q7-01	6.239
TCGA-BH-A0HY-01	6.238
TCGA-EE-A29D-06	6.238
TCGA-G4-6586-01	6.238
TCGA-Z6-A8JE-01	6.237
TCGA-BA-4077-01	6.237
TCGA-G9-6348-11	6.235
TCGA-Z7-A8R5-01	6.235
TCGA-C5-A1BK-01	6.235
TCGA-63-A5MJ-01	6.234
TCGA-XV-A9VZ-01	6.234
TCGA-Q1-A5R1-01	6.233
TCGA-CV-6960-01	6.233
TCGA-C5-A1MK-01	6.233
TCGA-55-8614-01	6.232
TCGA-51-4081-01	6.232
TCGA-PG-A916-01	6.232
TCGA-CQ-7063-01	6.232
TCGA-C8-A12Z-01	6.231
TCGA-GL-6846-01	6.231
TCGA-EM-A3FO-01	6.23
TCGA-FD-A6TB-01	6.229
TCGA-AR-A5QM-01	6.228
TCGA-A5-A7WJ-01	6.228
TCGA-CR-6472-01	6.227
TCGA-SX-A7SQ-01	6.227
TCGA-B5-A5OD-01	6.226
TCGA-55-6975-01	6.226
TCGA-56-A5DS-01	6.225
TCGA-D3-A3C6-06	6.225
TCGA-52-7811-01	6.225
TCGA-BB-A6UO-01	6.225
TCGA-AJ-A3NE-01	6.225
TCGA-EW-A1J6-01	6.223
TCGA-V7-A7HQ-01	6.223
TCGA-EE-A2M7-06	6.223
TCGA-IA-A83W-01	6.223
TCGA-FL-A1YU-11	6.223
TCGA-E9-A247-01	6.22
TCGA-E2-A14T-01	6.22
TCGA-DF-A2KN-01	6.22
TCGA-A7-A0CE-11	6.22
TCGA-DD-AA3A-01	6.22
TCGA-Q1-A6DV-01	6.219
TCGA-EK-A2PG-01	6.218
TCGA-OR-A5JY-01	6.218
TCGA-CV-7097-01	6.217
TCGA-FS-A1ZH-06	6.217
TCGA-CZ-5988-01	6.217
TCGA-AC-A3W6-01	6.217
TCGA-5P-A9K4-01	6.217
TCGA-BH-A18I-01	6.215
TCGA-58-8392-01	6.215
TCGA-66-2742-01	6.215
TCGA-HD-A4C1-01	6.215
TCGA-A5-A1OH-01	6.214
TCGA-HQ-A5ND-01	6.214
TCGA-22-1016-01	6.214
TCGA-A6-5662-11	6.214
TCGA-QK-A652-01	6.213
TCGA-MB-A5Y8-01	6.213
TCGA-BH-A0H3-01	6.212
TCGA-UP-A6WW-01	6.212
TCGA-AC-A3W5-01	6.212
TCGA-LL-A5YN-01	6.21
TCGA-CN-6992-01	6.21
TCGA-VS-A9UJ-01	6.209
TCGA-37-A5EM-01	6.209
TCGA-BT-A2LB-01	6.209
TCGA-D6-A6EK-01	6.209
TCGA-E2-A159-01	6.208
TCGA-E9-A244-01	6.208
TCGA-A2-A4RX-01	6.207
TCGA-VS-A8QA-01	6.206
TCGA-GU-A762-01	6.206
TCGA-C5-A7X5-01	6.206
TCGA-CV-7434-11	6.205
TCGA-D6-6824-01	6.205
TCGA-BH-A0DP-01	6.205
TCGA-BH-A18V-11	6.204
TCGA-E9-A1R3-01	6.204
TCGA-BH-A0BP-01	6.203
TCGA-DX-A1L4-01	6.203
TCGA-IG-A3I8-01	6.203
TCGA-LD-A66U-01	6.203
TCGA-IG-A5B8-01	6.203
TCGA-AG-3732-11	6.202
TCGA-78-7147-01	6.201
TCGA-CR-7371-01	6.201
TCGA-E2-A152-01	6.2
TCGA-AO-A1KT-01	6.2
TCGA-BH-A0B3-01	6.2
TCGA-EW-A1J3-01	6.199
TCGA-CR-5249-01	6.196
TCGA-C5-A1BF-01	6.196
TCGA-CV-A6JZ-01	6.195
TCGA-AD-A5EJ-01	6.194
TCGA-49-AAR9-01	6.193
TCGA-GC-A3RB-01	6.193
TCGA-86-8279-01	6.192
TCGA-DM-A280-01	6.192
TCGA-SX-A71S-01	6.192
TCGA-CN-5374-01	6.191
TCGA-CR-5243-01	6.191
TCGA-DK-A2I4-01	6.191
TCGA-FT-A3EE-01	6.19
TCGA-E2-A1BD-01	6.189
TCGA-4Z-AA7Y-01	6.189
TCGA-BB-A6UM-01	6.189
TCGA-CC-A1HT-01	6.189
TCGA-YU-A94D-01	6.188
TCGA-77-8009-01	6.188
TCGA-60-2707-01	6.187
TCGA-VS-A8QC-01	6.187
TCGA-DX-AB37-01	6.187
TCGA-A2-A0CZ-01	6.187
TCGA-BR-A4J5-01	6.187
TCGA-B6-A40B-01	6.187
TCGA-E2-A10C-01	6.186
TCGA-21-1070-01	6.186
TCGA-CQ-6218-01	6.186
TCGA-IQ-7632-01	6.186
TCGA-IB-AAUU-01	6.186
TCGA-56-6545-01	6.185
TCGA-B5-A0K9-01	6.183
TCGA-AR-A24P-01	6.182
TCGA-CN-4741-01	6.182
TCGA-C5-A1BM-01	6.182
TCGA-XF-A9SM-01	6.182
TCGA-EO-A3KW-01	6.181
TCGA-DK-AA71-01	6.181
TCGA-C5-A1MH-01	6.181
TCGA-NJ-A4YP-01	6.181
TCGA-VS-A94W-01	6.179
TCGA-BT-A20X-01	6.178
TCGA-G3-AAV7-01	6.178
TCGA-KF-A41W-01	6.178
TCGA-78-7143-01	6.177
TCGA-34-8455-01	6.177
TCGA-34-2608-01	6.176
TCGA-CV-5436-01	6.176
TCGA-E2-A1IL-01	6.176
TCGA-13-1496-01	6.176
TCGA-CJ-5677-01	6.175
TCGA-OL-A66L-01	6.175
TCGA-XF-A9SJ-01	6.174
TCGA-C8-A26W-01	6.173
TCGA-UF-A7JV-01	6.173
TCGA-XD-AAUL-01	6.172
TCGA-ZJ-AAXF-01	6.171
TCGA-FS-A1ZB-06	6.171
TCGA-BH-A0BM-11	6.171
TCGA-AJ-A3OK-01	6.171
TCGA-50-6597-01	6.17
TCGA-UC-A7PG-01	6.17
TCGA-ZB-A969-01	6.169
TCGA-N9-A4Q4-01	6.169
TCGA-DK-A6AV-01	6.169
TCGA-50-6591-01	6.168
TCGA-WL-A834-01	6.168
TCGA-BH-A0HI-01	6.168
TCGA-CV-7422-01	6.168
TCGA-RB-A7B8-01	6.168
TCGA-A2-A04N-01	6.167
TCGA-AN-A0AS-01	6.167
TCGA-A1-A0SB-01	6.166
TCGA-VS-A950-01	6.166
TCGA-AO-A0J9-01	6.166
TCGA-OL-A5S0-01	6.166
TCGA-AJ-A8CW-01	6.165
TCGA-26-5139-01	6.165
TCGA-LP-A5U3-01	6.163
TCGA-77-A5G3-01	6.163
TCGA-C5-A7X8-01	6.162
TCGA-85-8072-01	6.162
TCGA-B5-A3FC-01	6.162
TCGA-EW-A1P3-01	6.162
TCGA-OL-A5RW-01	6.162
TCGA-MA-AA3X-01	6.162
TCGA-ND-A4W6-01	6.161
TCGA-GU-A42R-01	6.161
TCGA-QH-A6CV-01	6.161
TCGA-D8-A27P-01	6.16
TCGA-N8-A4PN-01	6.159
TCGA-DX-AB36-01	6.159
TCGA-56-8201-01	6.159
TCGA-FL-A1YT-11	6.159
TCGA-E2-A10F-01	6.158
TCGA-E2-A1IO-01	6.157
TCGA-77-6844-01	6.157
TCGA-4Z-AA7O-01	6.157
TCGA-CN-4723-01	6.157
TCGA-BA-A6DD-01	6.157
TCGA-BL-A13J-11	6.157
TCGA-UZ-A9PX-01	6.157
TCGA-IQ-A61H-01	6.156
TCGA-18-3408-01	6.156
TCGA-A2-A0D0-01	6.156
TCGA-B4-5843-01	6.156
TCGA-D8-A27K-01	6.155
TCGA-E7-A541-01	6.155
TCGA-LN-A8HZ-01	6.154
TCGA-43-6770-01	6.154
TCGA-WK-A8XQ-01	6.154
TCGA-C4-A0F1-01	6.154
TCGA-3A-A9I7-01	6.154
TCGA-76-4931-01	6.153
TCGA-N8-A4PI-01	6.153
TCGA-A7-A0CH-01	6.153
TCGA-LN-A7HW-01	6.152
TCGA-NK-A7XE-01	6.152
TCGA-E5-A4TZ-01	6.152
TCGA-IA-A83V-01	6.152
TCGA-AO-A03U-01	6.152
TCGA-N7-A4Y8-01	6.151
TCGA-L9-A443-01	6.151
TCGA-EW-A1PC-01	6.151
TCGA-60-2708-01	6.151
TCGA-UF-A7JH-01	6.151
TCGA-61-1738-01	6.151
TCGA-EE-A17Z-06	6.151
TCGA-QK-A6V9-01	6.15
TCGA-GM-A2DK-01	6.149
TCGA-66-2734-01	6.148
TCGA-BH-A0HN-01	6.148
TCGA-H6-8124-01	6.147
TCGA-UZ-A9PN-01	6.147
TCGA-OE-A75W-01	6.146
TCGA-C8-A12N-01	6.145
TCGA-N6-A4V9-01	6.144
TCGA-76-4927-01	6.144
TCGA-BH-A0HF-01	6.143
TCGA-XF-A9SL-01	6.142
TCGA-CV-6941-01	6.141
TCGA-FB-A7DR-01	6.141
TCGA-AO-A0JA-01	6.14
TCGA-BH-A1F6-11	6.14
TCGA-LA-A7SW-01	6.14
TCGA-68-8251-01	6.14
TCGA-EJ-7123-11	6.139
TCGA-98-A53I-01	6.139
TCGA-AO-A0JF-01	6.139
TCGA-HQ-A5NE-01	6.139
TCGA-IA-A40U-01	6.139
TCGA-CN-5356-01	6.137
TCGA-62-8402-01	6.136
TCGA-AR-A1AN-01	6.136
TCGA-ZH-A8Y2-01	6.133
TCGA-FU-A2QG-01	6.132
TCGA-GC-A6I1-01	6.132
TCGA-OR-A5JX-01	6.132
TCGA-A4-8630-01	6.132
TCGA-AO-A0J3-01	6.131
TCGA-E9-A1QZ-01	6.131
TCGA-EW-A1P8-01	6.131
TCGA-77-8154-01	6.13
TCGA-BT-A20V-01	6.13
TCGA-DU-A7TD-01	6.13
TCGA-FD-A6TK-01	6.129
TCGA-D3-A2JA-06	6.129
TCGA-MY-A5BF-01	6.128
TCGA-RA-A741-01	6.128
TCGA-AN-A0XP-01	6.128
TCGA-ZJ-AAX8-01	6.126
TCGA-CN-4736-01	6.126
TCGA-DC-6156-01	6.126
TCGA-E2-A14Z-01	6.125
TCGA-OR-A5J1-01	6.125
TCGA-DS-A0VN-01	6.125
TCGA-IB-A5SO-01	6.125
TCGA-HE-A5NL-01	6.125
TCGA-A8-A07E-01	6.124
TCGA-06-0157-01	6.123
TCGA-58-A46J-01	6.122
TCGA-13-1477-01	6.122
TCGA-EO-A22Y-01	6.12
TCGA-AO-A12C-01	6.12
TCGA-BH-A1FN-11	6.12
TCGA-63-A5MG-01	6.118
TCGA-EO-A22U-01	6.117
TCGA-VR-A8EW-01	6.117
TCGA-TS-A7P8-01	6.116
TCGA-Z4-AAPF-01	6.115
TCGA-CV-A45Y-01	6.115
TCGA-A8-A0AD-01	6.115
TCGA-FD-A6TF-01	6.114
TCGA-AX-A3G7-01	6.112
TCGA-D8-A27R-01	6.111
TCGA-CV-5441-01	6.111
TCGA-56-8309-01	6.11
TCGA-AC-A2QI-01	6.11
TCGA-BA-5151-01	6.11
TCGA-RB-AA9M-01	6.11
TCGA-CM-6167-01	6.11
TCGA-A8-A084-01	6.109
TCGA-B6-A0I2-01	6.109
TCGA-91-6829-01	6.109
TCGA-G2-A2ES-01	6.109
TCGA-BH-A18M-01	6.108
TCGA-AR-A1AS-01	6.108
TCGA-2F-A9KO-01	6.107
TCGA-BH-A1F8-01	6.107
TCGA-EB-A6QZ-01	6.107
TCGA-CU-A72E-01	6.106
TCGA-E2-A14O-01	6.105
TCGA-CV-6939-01	6.105
TCGA-FD-A3SQ-01	6.104
TCGA-DU-A7TJ-01	6.103
TCGA-06-1804-01	6.102
TCGA-BH-A0W4-01	6.102
TCGA-13-0901-01	6.102
TCGA-DW-7842-01	6.102
TCGA-DX-A48J-01	6.101
TCGA-A2-A0CV-01	6.101
TCGA-FL-A3WE-11	6.101
TCGA-XE-AANI-01	6.1
TCGA-BT-A42C-01	6.1
TCGA-QQ-A8VH-01	6.099
TCGA-EY-A1GP-01	6.099
TCGA-A7-A6VX-01	6.098
TCGA-AR-A2LQ-01	6.098
TCGA-QQ-A5VA-01	6.097
TCGA-58-A46L-01	6.096
TCGA-GM-A2DD-01	6.096
TCGA-N5-A4RN-01	6.096
TCGA-B6-A0IP-01	6.095
TCGA-49-AARO-01	6.095
TCGA-DQ-7590-01	6.095
TCGA-A2-A0YD-01	6.094
TCGA-CV-7425-01	6.094
TCGA-CR-6491-01	6.093
TCGA-FU-A5XV-01	6.092
TCGA-FU-A3TQ-01	6.092
TCGA-TN-A7HL-01	6.092
TCGA-CR-7394-01	6.092
TCGA-76-4925-01	6.092
TCGA-OL-A5RY-01	6.09
TCGA-77-7465-01	6.09
TCGA-C5-A7CH-01	6.09
TCGA-BP-5010-01	6.09
TCGA-A8-A095-01	6.089
TCGA-A2-A1FZ-01	6.089
TCGA-W8-A86G-01	6.089
TCGA-MN-A4N1-01	6.089
TCGA-FD-A43S-01	6.089
TCGA-G7-A8LE-01	6.089
TCGA-IB-A5SS-01	6.088
TCGA-GN-A26A-06	6.088
TCGA-ZF-AA4V-01	6.088
TCGA-FL-A1YN-11	6.088
TCGA-BH-A204-01	6.086
TCGA-18-3414-01	6.086
TCGA-66-2787-01	6.086
TCGA-05-4396-01	6.086
TCGA-B6-A409-01	6.086
TCGA-AN-A0FT-01	6.085
TCGA-C8-A134-01	6.085
TCGA-BA-A6DA-01	6.085
TCGA-B0-5701-01	6.084
TCGA-B3-4103-01	6.084
TCGA-3B-A9I0-01	6.084
TCGA-Z7-A8R6-01	6.083
TCGA-2G-AALR-01	6.083
TCGA-DK-A1AA-01	6.083
TCGA-HV-AA8X-01	6.083
TCGA-B6-A0I5-01	6.082
TCGA-EE-A2GS-06	6.081
TCGA-VS-A9UU-01	6.08
TCGA-AR-A2LN-01	6.079
TCGA-GN-A4U9-06	6.079
TCGA-96-7545-01	6.079
TCGA-49-4507-01	6.078
TCGA-3A-A9IH-01	6.078
TCGA-Q2-A5QZ-01	6.078
TCGA-FX-A3RE-01	6.077
TCGA-XX-A89A-01	6.076
TCGA-DX-AB32-01	6.076
TCGA-EW-A1P1-01	6.076
TCGA-CQ-6223-01	6.076
TCGA-US-A77J-01	6.075
TCGA-EY-A1GL-01	6.074
TCGA-F5-6810-01	6.074
TCGA-EY-A2OP-01	6.074
TCGA-AC-A62V-01	6.073
TCGA-XF-A9SP-01	6.073
TCGA-AR-A2LM-01	6.072
TCGA-EE-A2MP-06	6.072
TCGA-BH-A1FU-01	6.071
TCGA-XE-AAOJ-01	6.071
TCGA-HD-7917-01	6.071
TCGA-CN-4733-01	6.071
TCGA-D8-A27G-01	6.07
TCGA-EA-A3HQ-01	6.07
TCGA-33-AASL-01	6.07
TCGA-77-8144-01	6.07
TCGA-BS-A0V7-01	6.07
TCGA-A2-A1G6-01	6.069
TCGA-HE-A5NI-01	6.069
TCGA-2G-AALW-01	6.069
TCGA-MJ-A68H-01	6.068
TCGA-FE-A3PA-01	6.068
TCGA-A2-A0EM-01	6.068
TCGA-MQ-A4LI-01	6.068
TCGA-FX-A8OO-01	6.067
TCGA-BH-A1EO-11	6.067
TCGA-D8-A73X-01	6.067
TCGA-K4-A5RH-01	6.067
TCGA-KB-A93J-01	6.067
TCGA-85-7710-01	6.066
TCGA-KQ-A41N-01	6.066
TCGA-27-2523-01	6.066
TCGA-E7-A677-01	6.066
TCGA-D1-A3DH-01	6.066
TCGA-HD-8224-01	6.065
TCGA-CV-7429-01	6.065
TCGA-CV-7263-01	6.065
TCGA-AX-A3FW-01	6.065
TCGA-P5-A72U-01	6.065
TCGA-TS-A8AI-01	6.065
TCGA-AC-A3YJ-01	6.064
TCGA-B5-A0JR-01	6.064
TCGA-AN-A03X-01	6.063
TCGA-FU-A40J-01	6.062
TCGA-43-7656-01	6.062
TCGA-E9-A22A-01	6.062
TCGA-CV-6933-01	6.062
TCGA-62-A471-01	6.061
TCGA-CX-7085-01	6.061
TCGA-06-0184-01	6.06
TCGA-D8-A1XO-01	6.059
TCGA-GV-A3JX-01	6.059
TCGA-CQ-7071-01	6.059
TCGA-C5-A8YQ-01	6.059
TCGA-DX-A6B7-01	6.059
TCGA-A7-A26G-01	6.058
TCGA-BR-8384-01	6.058
TCGA-CV-A45P-01	6.057
TCGA-94-A4VJ-01	6.056
TCGA-55-6981-01	6.056
TCGA-AC-A7VC-01	6.056
TCGA-PZ-A5RE-01	6.056
TCGA-KQ-A41S-01	6.056
TCGA-P4-A5E8-01	6.056
TCGA-CM-4743-01	6.056
TCGA-AN-A04D-01	6.055
TCGA-MZ-A6I9-01	6.055
TCGA-2J-AAB4-01	6.055
TCGA-AX-A2HD-11	6.055
TCGA-KS-A4I1-01	6.055
TCGA-FD-A62N-01	6.054
TCGA-C5-A1ML-01	6.053
TCGA-DK-A3X1-01	6.053
TCGA-FB-A545-01	6.053
TCGA-DG-A2KK-01	6.052
TCGA-L5-A43H-01	6.051
TCGA-DW-7838-01	6.05
TCGA-CF-A9FH-01	6.049
TCGA-E9-A1N6-01	6.049
TCGA-B6-A0WY-01	6.047
TCGA-CV-7406-01	6.047
TCGA-AR-A0TU-01	6.047
TCGA-LB-A7SX-01	6.047
TCGA-D8-A1JP-01	6.046
TCGA-B6-A0RH-01	6.046
TCGA-77-A5G7-01	6.046
TCGA-EO-A3AY-01	6.046
TCGA-FR-A3YO-06	6.045
TCGA-BH-A0E0-01	6.045
TCGA-HG-A2PA-01	6.044
TCGA-BG-A0MK-01	6.044
TCGA-OL-A5DA-01	6.043
TCGA-B5-A5OC-01	6.043
TCGA-CX-7219-01	6.043
TCGA-BA-A4II-01	6.043
TCGA-A8-A09B-01	6.042
TCGA-LN-A5U7-01	6.042
TCGA-XF-AAMY-01	6.042
TCGA-D8-A1XM-01	6.04
TCGA-NC-A5HL-01	6.04
TCGA-AN-A0AL-01	6.037
TCGA-MQ-A4LJ-01	6.036
TCGA-GL-A59T-01	6.036
TCGA-CN-5359-01	6.035
TCGA-WE-A8K1-06	6.034
TCGA-VS-A8QM-01	6.033
TCGA-C5-A7XC-01	6.033
TCGA-D8-A1Y2-01	6.033
TCGA-NA-A4QV-01	6.032
TCGA-PL-A8LZ-01	6.031
TCGA-DQ-7595-01	6.031
TCGA-ZN-A9VW-01	6.03
TCGA-MQ-A4LP-01	6.029
TCGA-A2-A0YI-01	6.028
TCGA-EO-A22X-01	6.028
TCGA-BF-A1PX-01	6.028
TCGA-CV-7411-01	6.028
TCGA-CR-7367-01	6.027
TCGA-E2-A10B-01	6.027
TCGA-HD-7754-01	6.026
TCGA-UC-A7PI-01	6.025
TCGA-FD-A5BT-01	6.025
TCGA-DX-A48N-01	6.023
TCGA-DX-A2IZ-01	6.023
TCGA-AF-6136-01	6.023
TCGA-BH-A0HQ-01	6.022
[truncated: 10,841 more rows]

## Sheet: Methylation analysis results
Supplementary Table 2: PTGFRN Methylation analysis results in Pan-cancer
	cg22448232	cg08361238	cg12406825	cg24047400	cg17469019	cg22736787	cg26029682	cg04997273	cg11221228	cg20963995	cg07013552	cg03752628	cg18227189	cg18937014	cg02283766	cg15986529	cg13100218	cg01497426	cg08870281	cg23093116	cg17755460	cg03437741	cg06854150	cg23972301	cg00810529	cg12267236	cg08113916	cg14027204	cg15937641	cg17042439	cg24687529	cg11708721	cg22858959
ACC	-0.24291	-0.468653	-0.348626	-0.316172	-0.181493	-0.179812	-0.138061	-0.0926217	-0.112225	0.110337	-0.0258238	-0.425072	-0.198804	-0.391278	-0.20798	-0.0445062	-0.205448	-0.262107	-0.195571	-0.175587	-0.278352	-0.216137	-0.0545119	-0.0464881	-1.36717e-05	0.021162	-0.381692	0.0364598	-0.190395	0.0576514	0.104211	-0.0658792	-0.247685
BLCA	-0.102417	0.00699523	-0.162483	0.0724474	-0.0590593	-0.176523	-0.171901	-0.162092	-0.177909	-0.152508	-0.0408459	-0.0399691	0.119398	0.412018	0.112748	-0.0107362	0.0993557	-0.0546425	0.0112439	0.0534554	0.291454	0.229508	0.189449	0.129448	0.163142	-0.101285	0.0533771	-0.0299402	-0.0215621	-0.0476704	-0.0457134	-0.0372027	-0.152986
BRCA	0.000744881	-0.217556	-0.16125	-0.0698876	-0.0741517	-0.14101	-0.0956099	-0.11485	-0.15849	-0.122547	-0.129047	-0.20437	-0.0126637	-0.0290529	0.0959351	0.0929307	0.0678055	0.0257231	-0.0382476	0.0420963	0.0118171	-0.0059947	0.138024	0.116422	0.120761	0.0119735	0.0702372	0.0649503	0.0973882	0.100776	0.0937057	0.0771552	-0.18818
CESC	-0.0452808	-0.108392	-0.216346	-0.044463	-0.206916	-0.101106	-0.114857	-0.135888	-0.106023	-0.0342845	0.106789	-0.0984838	0.00535635	-0.0811851	0.212127	0.0537268	-0.027362	0.053397	-0.084273	0.154609	-0.00501968	-0.100353	0.173479	0.179911	0.201949	-0.0745232	0.12665	0.17063	0.102186	0.133212	0.152313	0.0465913	-0.116803
CHOL	-0.241601	-0.352638	-0.40592	-0.416731	-0.531469	-0.251368	-0.266667	-0.342342	-0.218018	-0.145174	-0.0960103	-0.456885	-0.0694981	-0.0427312	0.177126	0.0413287	0.127671	-0.0651348	0.262033	0.117117	-0.02574	-0.0208494	0.29101	0.246766	0.260746	0.120978	0.300792	0.0676963	-0.114543	-0.114286	-0.0962677	-0.0738739	-0.106442
COAD	-0.0119094	0.11823	-0.144629	0.0533061	-0.266151	-0.125705	-0.136462	-0.160615	-0.203364	-0.0921536	0.134407	0.145582	-0.0220601	-0.0672169	0.169124	0.0163273	0.0290059	-0.0649264	-0.0925711	0.045835	0.000637323	0.0443685	0.158934	0.118727	0.155151	-0.180516	-0.0079355	-0.107547	-0.172898	-0.173254	-0.217035	-0.16649	-0.187006
DLBC	0.232192	-0.268617	-0.185592	-0.216004	-0.275786	-0.0883441	-0.115634	-0.0610546	-0.0134135	-0.0409343	-0.095629	-0.11679	-0.0475846	0.184436	-0.106614	-0.297646	-0.0212778	-0.0442877	0.284343	0.502313	0.00346901	-0.251735	0.216241	-0.142613	0.103961	0.0460222	0.157262	0.0208141	0.209181	0.19704	-0.0231267	-0.0645236	0.0167669
ESCA	-0.241083	-0.135223	-0.259361	-0.180883	-0.353548	-0.293069	-0.0391604	-0.16537	-0.11512	-0.128238	-0.0803938	-0.113884	-0.337108	0.0150268	0.172977	0.0785043	0.0942448	0.0319102	0.145375	0.186974	-0.276519	-0.177891	0.0621382	0.264168	0.274074	-0.180407	0.0510716	0.308777	0.380308	0.30055	0.313724	0.217069	-0.196944
GBM	-0.176989	-0.0236655	-0.030866	-0.0104167	-0.00334928	-0.0244579	0.0836214	0.107243	0.132034	-0.143557	-0.0527074	-0.342794	0.00969662	-0.0263537	0.181984	0.0460005	-0.00192026	-0.145455	-0.0445954	-0.0671083	-0.10772	0.0273621	0.0100815	-0.0264567	0.00444092	-0.112377	0.343714	-0.060198	0.0359543	-0.0478591	-0.115735	-0.0993184	-0.267905
HNSC	-0.168059	-0.19835	-0.305797	-0.144782	-0.270286	-0.285437	-0.289156	-0.229971	-0.285294	-0.277258	-0.170814	-0.170563	0.0280203	-0.0536832	0.169093	0.0890191	0.137751	-0.00929048	-0.0530381	0.0547588	-0.0628542	0.0115998	0.245464	0.231159	0.295838	-0.0721384	0.0760253	0.129623	0.147121	0.093106	0.0810351	0.0505186	-0.0223932
KICH	-0.211083	0.148478	-0.296792	-0.0569524	-0.345521	-0.21636	-0.277506	-0.247301	-0.205348	-0.287166	0.0295343	0.226239	-0.179798	-0.26641	0.00432721	-0.0165085	-0.0960374	-0.23406	0.0467901	0.0206309	0.00332186	-0.0767087	0.405963	0.154636	0.28381	-0.234737	-0.0917485	-0.154488	-0.23751	-0.0391206	-0.314466	-0.110517	-0.256663
KIRC	0.0560595	0.0546414	-0.0571901	-0.0184084	-0.13056	-0.00621287	0.039569	0.00252222	0.0238398	-0.0131343	-0.21333	-0.0898978	0.183017	0.0131624	0.245267	-0.037614	0.0592322	0.0758726	0.0712356	0.0287526	0.216618	0.086531	0.0426979	0.0514977	0.00568982	-0.00137349	0.254428	0.0791678	0.12713	0.104392	-0.0451447	0.125907	0.145215
KIRP	-0.115501	-0.242937	-0.158929	-0.148242	-0.0971257	-0.125268	-0.0143703	0.0245635	0.0331042	-0.0183503	-0.156249	-0.379338	0.00866635	0.0283975	0.0634742	-0.111102	-0.109025	0.0255122	0.0743088	0.0847597	0.0497665	-0.128884	0.100485	-0.0471564	0.0525449	-0.361071	-0.121546	0.120909	0.165327	0.0668975	0.0848016	0.0976133	-0.0487575
LAML	0.169168	-0.136573	-0.203883	-0.312183	-0.215541	-0.229182	-0.167287	-0.25704	-0.181386	-0.106014	-0.26285	-0.1023	0.192914	0.202922	0.217674	0.204198	0.189965	0.256607	0.0346965	-0.000549619	0.298054	0.0991386	0.063509	0.125193	-0.00776164	0.280505	0.206709	-0.135564	-0.115704	-0.0957785	-0.10306	-0.135067	0.148979
LGG	-0.579125	-0.503789	-0.436532	-0.354249	-0.247659	-0.229496	-0.1641	-0.0570357	-0.055306	-0.466745	-0.531265	-0.614733	-0.392054	-0.31258	0.114041	-0.00896045	-0.0854528	-0.276402	-0.403711	-0.00100107	-0.227361	-0.141575	0.14764	0.106718	0.140962	-0.397123	-0.218304	-0.279483	-0.309112	-0.189094	-0.276196	-0.337675	-0.50503
LIHC	0.117205	-0.262537	-0.15706	0.079371	-0.175358	-0.139356	-0.0649062	0.0139432	-0.0511166	-0.0737149	-0.0965336	-0.198515	0.145028	0.0872829	0.281474	0.071687	0.195526	0.127338	0.148934	0.202508	0.16611	0.0668635	0.201263	0.212821	0.2137	0.193698	0.219794	-0.028942	0.0153383	-0.0827691	-0.134904	-0.172582	0.124582
LUAD	-0.015048	-0.209999	-0.109774	-0.137595	-0.230259	-0.274816	-0.11249	-0.0941478	-0.176675	-0.0801686	-0.152768	-0.215679	0.0650052	0.00606707	0.165444	-0.0520315	0.167999	-0.0137032	0.119666	0.134276	0.0230482	0.0817575	0.163537	0.0908638	0.140791	0.0589985	0.166861	0.0788286	0.153442	0.0790595	0.0383549	-0.000874773	-0.105131
LUSC	-0.168484	-0.301545	-0.293189	-0.230509	-0.244448	-0.190663	-0.16582	-0.115393	-0.107047	-0.0646842	-0.165356	-0.343806	-0.177821	-0.179223	0.170908	0.0366311	0.0404315	-0.0227137	-0.156104	0.0431371	0.029242	0.0251835	0.148338	0.11951	0.127631	-0.0430329	0.0593345	0.271774	0.231242	0.2044	0.216785	0.0814064	-0.342791
MESO	-0.168016	-0.166992	-0.10817	-0.0302137	-0.114213	-0.215064	-0.249241	-0.129732	-0.13057	-0.223979	-0.0936989	-0.180234	0.0757934	-0.0947837	0.237153	0.147098	0.149146	-0.0140156	-0.0558165	-0.0142935	0.0182443	-0.00236339	0.0765403	0.112507	0.00552265	0.120354	0.13828	0.146116	0.206433	0.0846365	-0.004119	-0.062113	-0.265222
OV	0.1	-0.0666667	-0.283333	0.333333	-0.716667	-0.466667	-0.683333	-0.433333	-0.5	-0.416667	-0.0333333	0.0333333	0.283333	0.333333	0.433333	-0.0251048	0.15	-0.35	-0.183333	0.35	-0.25	0.2	0.1	0.277321	0.416667	-0.216667	0.15	0.2	0.15	0.0666667	0.116667	0.15	0.0666667
PAAD	0.0168611	-0.0022172	-0.169227	0.0330617	0.0177166	-0.148465	-0.167719	0.0107685	-0.0725844	-0.229463	-0.0706072	0.00497274	-0.0763406	-0.141578	0.0638357	0.0119014	-0.0421534	-0.113826	0.0440828	-0.0257685	-0.0882556	0.0240616	0.171958	0.0691576	0.157296	-0.0903127	-0.00745171	0.135573	0.209895	0.177824	0.144252	0.167491	-0.411387
PCPG	0.146812	0.0581852	-0.12838	0.115756	-0.270797	-0.273643	-0.298274	-0.0636348	-0.203533	-0.141238	0.0916662	-0.262932	-0.0945349	0.178162	0.352215	0.0641739	0.240073	-0.032839	0.464766	0.293919	0.409658	-0.0510877	0.365515	0.230127	0.299546	0.501823	0.316801	-0.295306	0.0941008	0.209967	0.165634	0.259897	0.0872657
PRAD	-0.171856	-0.0647345	-0.0562802	-0.0141105	-0.00968214	-0.0648896	-0.105674	-0.0232201	-0.0756872	-0.087136	0.0368623	-0.00986084	-0.289905	-0.195387	0.0705898	-0.0301611	0.0184383	-0.119755	-0.354308	-0.118835	-0.2942	-0.0281692	0.0771084	0.0438738	0.120461	-0.343271	-0.0133604	-0.353099	-0.325436	-0.263109	-0.349278	-0.408814	-0.286646
READ	-0.0978592	-0.0685523	-0.389533	0.0196049	-0.382433	-0.155217	-0.0464894	0.0423798	-0.114085	0.0183881	0.221948	0.00296246	-0.0779206	-0.167362	0.307587	-0.0277368	-0.0141862	-0.0355259	-0.241035	0.385258	-0.114839	0.0344837	0.201772	0.164015	0.275612	-0.115876	-0.0673497	-0.142509	-0.0733721	-0.0141423	0.0218692	0.00303794	0.0102129
SARC	0.0262865	-0.356012	-0.285873	-0.274284	-0.259071	-0.238408	-0.0913872	-0.242791	-0.172507	-0.141998	-0.244032	-0.410972	0.204815	0.238049	0.351411	0.0973272	0.187586	0.0903769	0.206305	0.146778	0.221303	-0.0352561	0.298562	0.183586	0.24734	-0.0692325	0.263379	0.146958	0.196898	0.207353	0.203152	0.0738865	-0.103009
SKCM	-0.132484	-0.450617	-0.422962	-0.254746	-0.220456	-0.309885	-0.195737	-0.188069	-0.132101	-0.17423	-0.274063	-0.497457	0.154638	0.00288414	0.187146	0.100548	0.211759	0.0956349	-0.380644	0.0410364	0.215878	-0.00262569	0.266289	0.206324	0.209757	0.312915	0.0506655	0.0836914	0.117931	-0.0591781	-0.0787913	-0.11218	-0.313674
STAD	-0.360092	-0.0559675	-0.359926	-0.100621	-0.0977162	-0.221113	-0.333443	-0.262835	-0.259652	-0.330807	-0.108157	-0.0388036	-0.123178	0.00980476	0.212589	0.0919685	0.108382	0.0711688	-0.150105	-0.06426	-0.110765	0.048837	0.191116	0.251153	0.282034	-0.218354	0.0982928	0.125127	0.10524	0.115045	0.116647	0.0465105	-0.222445
TGCT	0.253479	-0.426399	-0.398587	-0.318186	-0.359236	-0.296506	-0.278233	-0.337272	-0.25405	-0.237074	-0.188143	-0.311293	0.326616	0.414105	0.436041	0.365469	0.387187	0.36936	0.290477	0.181467	0.419005	0.428994	0.416402	0.460653	0.439196	0.383278	0.398484	0.369902	0.40327	0.418474	0.366056	0.3043	0.342191
THCA	-0.0196678	-0.0528789	-0.154603	-0.056375	0.00414142	-0.141088	-0.147157	-0.154358	-0.170538	-0.122464	-0.110306	-0.0348577	0.0093959	-0.0284302	0.127694	0.0220775	0.153729	0.00150651	-0.102583	-0.0674775	-0.161689	-0.00154449	0.0335306	0.0802784	0.0775356	-0.0528472	0.0405784	-0.0846637	-0.0585678	-0.0466099	-0.107533	-0.130228	-0.156133
THYM	-0.219635	-0.479745	-0.358516	-0.374264	0.0590661	-0.110693	-0.0399949	-0.0237044	-0.0944084	0.0983597	-0.155014	-0.457264	-0.00155253	0.0732891	-0.201606	0.0925812	-0.0548683	-0.0557446	0.225226	-0.170959	-0.17235	0.0600726	-0.107741	-0.0655309	-0.0782376	-0.437924	-0.166814	0.251196	0.256275	0.44077	0.525749	0.524884	0.00462021
UCEC	-0.252846	-0.196463	-0.206094	-0.236111	-0.128433	-0.223767	-0.0687394	-0.0953533	-0.152613	-0.0434828	-0.166144	-0.31004	-0.107432	-0.0515027	-0.204911	-0.0212169	0.10943	-0.0579614	0.035954	0.0968136	-0.259753	-0.180739	0.0486843	0.0723014	0.181603	0.104493	0.00537557	0.115453	0.146757	0.134071	0.111172	0.15085	0.0226411
UCS	-0.211577	-0.114437	-0.243623	-0.105364	-0.170455	-0.234289	-0.0410954	-0.144994	-0.0102094	-0.220908	-0.127435	-0.274741	-0.0673462	-0.267963	-0.0057041	-0.102295	0.256863	0.00994977	-0.0917842	-0.0574614	-0.0702954	-0.335386	-0.0328044	0.233776	0.186026	0.00228488	0.0618376	0.135019	0.182496	0.118942	0.131095	0.107047	-0.28358
UVM	-0.396144	0.0956322	-0.340782	-0.145098	-0.380652	-0.469257	-0.523315	-0.232463	-0.405859	-0.350451	0.165254	-0.0952787	-0.224432	-0.0749775	0.25474	-0.0388797	0.0853138	-0.22899	-0.185483	0.244803	-0.183441	0.22932	0.442185	0.224072	0.366628	-0.086285	0.198239	-0.154589	-0.203768	-0.00541044	-0.259175	-0.259229	0.0358769

## Sheet: CNV results
Supplementary Table 3: PTGFRN CNV results in Pan-cancer
sample	PTGFRN	PTGFRN
TCGA-IQ-A61O-01	3.657	2
TCGA-LN-A49W-01	3.657	2
TCGA-A8-A0A6-01	3.657	2
TCGA-2J-AABO-01	3.657	2
TCGA-36-1581-01	3.657	2
TCGA-EB-A44R-06	3.657	2
TCGA-61-1738-01	3.657	2
TCGA-EW-A6SA-01	3.22	2
TCGA-S4-A8RO-01	3.143	2
TCGA-77-A5G6-01	2.866	2
TCGA-3N-A9WB-06	2.794	2
TCGA-A7-A5ZV-01	2.787	1
TCGA-C8-A12L-01	2.692	2
TCGA-K4-A6MB-01	2.652	2
TCGA-BR-6458-01	2.615	2
TCGA-24-1564-01	2.502	2
TCGA-86-6562-01	2.46	2
TCGA-BL-A0C8-01	2.448	2
TCGA-24-2020-01	2.433	1
TCGA-BH-A0BD-01	2.276	1
TCGA-B6-A0WX-01	2.233	2
TCGA-04-1655-01	2.126	2
TCGA-AX-A3G4-01	2.114	2
TCGA-D3-A8GR-06	2.052	2
TCGA-ZH-A8Y5-01	1.993	2
TCGA-05-4396-01	1.954	2
TCGA-29-2428-01	1.821	2
TCGA-CU-A0YN-01	1.763	2
TCGA-LN-A5U6-01	1.731	2
TCGA-EE-A29L-06	1.726	1
TCGA-QR-A70X-01	1.703	2
TCGA-PG-A915-01	1.7	1
TCGA-C8-A12Z-01	1.675	2
TCGA-BC-A10W-01	1.662	1
TCGA-D3-A51R-06	1.634	1
TCGA-EJ-5525-01	1.6	1
TCGA-XE-AAOC-01	1.579	1
TCGA-D3-A51E-06	1.574	1
TCGA-ER-A19D-06	1.544	2
TCGA-A2-A04U-01	1.53	2
TCGA-20-0991-01	1.513	2
TCGA-IW-A3M5-01	1.502	2
TCGA-24-2026-01	1.496	2
TCGA-18-3411-01	1.453	2
TCGA-61-1919-01	1.418	2
TCGA-AR-A0TV-01	1.337	2
TCGA-XJ-A9DX-01	1.322	2
TCGA-D3-A51G-06	1.319	1
TCGA-ZP-A9D2-01	1.299	1
TCGA-29-1785-01	1.29	2
TCGA-HD-8635-01	1.288	2
TCGA-61-1918-01	1.284	1
TCGA-DK-AA6L-01	1.278	2
TCGA-12-1598-01	1.262	1
TCGA-57-1582-01	1.261	1
TCGA-AA-3952-01	1.26	1
TCGA-24-1466-01	1.253	2
TCGA-XU-A931-01	1.252	1
TCGA-N8-A4PN-01	1.245	1
TCGA-XF-AAMX-01	1.214	2
TCGA-29-1702-01	1.185	1
TCGA-2G-AAHC-01	1.184	2
TCGA-BH-A0W3-01	1.18	2
TCGA-OR-A5LL-01	1.178	1
TCGA-10-0936-01	1.159	1
TCGA-04-1347-01	1.155	1
TCGA-AR-A2LR-01	1.145	1
TCGA-BH-A1EX-01	1.143	1
TCGA-42-2593-01	1.131	1
TCGA-FR-A3YN-06	1.125	1
TCGA-25-2400-01	1.118	1
TCGA-A2-A0T2-01	1.112	1
TCGA-ER-A19G-06	1.107	1
TCGA-24-1845-01	1.104	1
TCGA-06-2569-01	1.099	1
TCGA-PC-A5DM-01	1.094	2
TCGA-E2-A14Z-01	1.092	1
TCGA-13-0904-01	1.085	2
TCGA-86-8279-01	1.08	1
TCGA-61-2003-01	1.073	1
TCGA-20-1685-01	1.064	2
TCGA-VS-A8EJ-01	1.06	1
TCGA-B6-A1KC-01	1.06	1
TCGA-FB-AAQ3-01	1.057	2
TCGA-13-0893-01	1.042	1
TCGA-D8-A1XW-01	1.034	1
TCGA-LN-A49P-01	1.031	2
TCGA-DD-AACN-01	1.029	2
TCGA-59-2372-01	1.027	1
TCGA-D3-A1Q1-06	1.026	1
TCGA-B6-A0I2-01	1.015	1
TCGA-EY-A212-01	1.008	2
TCGA-SI-AA8B-01	0.992	1
TCGA-A2-A0YM-01	0.984	1
TCGA-N1-A6IA-01	0.983	1
TCGA-30-1862-01	0.982	1
TCGA-BH-A0BJ-01	0.965	2
TCGA-FR-A69P-06	0.965	1
TCGA-AN-A0FK-01	0.964	1
TCGA-CC-A7IL-01	0.963	1
TCGA-EE-A29M-06	0.962	1
TCGA-EE-A2GP-06	0.95	1
TCGA-14-0871-01	0.945	1
TCGA-04-1360-01	0.941	1
TCGA-19-1787-01	0.938	1
TCGA-24-1616-01	0.927	1
TCGA-D9-A6EA-06	0.926	1
TCGA-E2-A158-01	0.921	2
TCGA-X6-A8C4-01	0.918	1
TCGA-BH-A8FY-01	0.916	1
TCGA-V1-A9O5-01	0.895	1
TCGA-DX-A2J0-01	0.879	2
TCGA-DK-A3X2-01	0.877	1
TCGA-23-1021-01	0.872	1
TCGA-EK-A2RA-01	0.87	1
TCGA-E7-A97Q-01	0.87	1
TCGA-61-2092-01	0.868	1
TCGA-61-1743-01	0.865	1
TCGA-L5-A4ON-01	0.864	1
TCGA-29-1783-01	0.863	1
TCGA-ZH-A8Y2-01	0.862	1
TCGA-D1-A0ZZ-01	0.859	1
TCGA-13-0899-01	0.85	1
TCGA-2G-AALR-01	0.848	1
TCGA-E2-A1LI-01	0.848	1
TCGA-VF-A8A8-01	0.844	1
TCGA-61-1733-01	0.841	1
TCGA-AJ-A23N-01	0.838	2
TCGA-R6-A6L4-01	0.836	1
TCGA-DD-AACJ-01	0.834	1
TCGA-EA-A5O9-01	0.827	1
TCGA-E2-A15R-01	0.827	1
TCGA-AF-6136-01	0.822	1
TCGA-LP-A5U2-01	0.822	1
TCGA-24-1471-01	0.821	1
TCGA-XE-AAO6-01	0.818	1
TCGA-N7-A4Y8-01	0.817	1
TCGA-FS-A1ZK-06	0.815	1
TCGA-AO-A0J3-01	0.814	1
TCGA-29-A5NZ-01	0.811	1
TCGA-13-1498-01	0.803	2
TCGA-A2-A1FV-01	0.803	1
TCGA-29-1770-01	0.803	1
TCGA-BP-4756-01	0.803	1
TCGA-EE-A2MQ-06	0.8	1
TCGA-VS-A954-01	0.799	1
TCGA-AR-A1AS-01	0.799	1
TCGA-DU-7010-01	0.798	1
TCGA-19-2625-01	0.796	1
TCGA-76-6283-01	0.793	1
TCGA-EY-A3QX-01	0.792	1
TCGA-W5-AA34-01	0.792	1
TCGA-EE-A29V-06	0.79	2
TCGA-BP-4352-01	0.79	1
TCGA-13-0919-01	0.786	1
TCGA-29-1763-01	0.784	1
TCGA-CC-A5UE-01	0.783	1
TCGA-D7-6526-01	0.78	1
TCGA-E2-A14X-01	0.78	1
TCGA-FZ-5920-01	0.777	2
TCGA-2G-AALX-01	0.776	1
TCGA-A8-A097-01	0.776	1
TCGA-B6-A0RI-01	0.772	1
TCGA-VS-A957-01	0.769	1
TCGA-D3-A3ML-06	0.768	1
TCGA-VS-A9UY-01	0.767	1
TCGA-DX-A6YV-01	0.764	1
TCGA-30-1718-01	0.763	1
TCGA-25-1314-01	0.761	1
TCGA-EY-A72D-01	0.759	1
TCGA-13-2059-01	0.759	1
TCGA-DX-AB2W-01	0.758	1
TCGA-JX-A3Q0-01	0.756	1
TCGA-A2-A1FX-01	0.755	1
TCGA-AZ-4682-01	0.755	1
TCGA-33-4533-01	0.751	1
TCGA-09-1670-01	0.751	1
TCGA-HQ-A2OE-01	0.745	1
TCGA-2G-AAM4-01	0.745	1
TCGA-H4-A2HQ-01	0.744	1
TCGA-BC-A216-01	0.742	1
TCGA-61-2111-01	0.741	1
TCGA-G3-A5SJ-01	0.737	1
TCGA-AC-A5XU-01	0.736	1
TCGA-36-2551-01	0.736	1
TCGA-LP-A4AV-01	0.735	1
TCGA-EE-A20I-06	0.735	1
TCGA-EW-A1PC-01	0.735	1
TCGA-AR-A24R-01	0.735	1
TCGA-AB-2820-03	0.735	1
TCGA-20-1684-01	0.734	2
TCGA-09-1665-01	0.733	1
TCGA-FY-A3NM-01	0.732	1
TCGA-D8-A1X5-01	0.731	1
TCGA-2H-A9GJ-01	0.731	1
TCGA-25-1313-01	0.731	1
TCGA-DX-A6YZ-01	0.73	1
TCGA-EE-A2GJ-06	0.729	1
TCGA-23-2079-01	0.728	1
TCGA-95-7562-01	0.726	1
TCGA-OR-A5J4-01	0.724	1
TCGA-DX-A8BU-01	0.72	1
TCGA-06-0168-01	0.718	1
TCGA-13-1410-01	0.717	1
TCGA-H4-A2HO-01	0.716	2
TCGA-EA-A3HQ-01	0.716	1
TCGA-61-2008-01	0.716	1
TCGA-F7-A622-01	0.715	1
TCGA-02-0266-01	0.714	1
TCGA-02-0451-01	0.711	1
TCGA-26-1440-01	0.711	1
TCGA-42-2591-01	0.708	1
TCGA-JW-A5VJ-01	0.707	1
TCGA-23-1031-01	0.706	1
TCGA-A1-A0SF-01	0.705	1
TCGA-AR-A0TP-01	0.705	1
TCGA-AB-2943-03	0.704	1
TCGA-13-1817-01	0.703	1
TCGA-GN-A4U4-06	0.7	1
TCGA-RT-A6YC-01	0.697	1
TCGA-14-1034-01	0.696	1
TCGA-60-2695-01	0.696	1
TCGA-63-7023-01	0.692	1
TCGA-2G-AAGA-01	0.692	1
TCGA-HT-A4DS-01	0.69	1
TCGA-OY-A56P-01	0.686	1
TCGA-CV-5442-01	0.685	1
TCGA-12-0662-01	0.685	1
TCGA-DD-AAVZ-01	0.683	1
TCGA-IR-A3LC-01	0.682	1
TCGA-AG-3591-01	0.676	1
TCGA-H5-A2HR-01	0.675	2
TCGA-13-0726-01	0.675	1
TCGA-DX-A7ET-01	0.674	1
TCGA-31-1959-01	0.673	1
TCGA-E2-A10E-01	0.672	1
TCGA-N9-A4Q3-01	0.67	1
TCGA-ZJ-AAXA-01	0.67	1
TCGA-HM-A3JK-01	0.669	1
TCGA-58-A46K-01	0.669	1
TCGA-Z7-A8R6-01	0.669	1
TCGA-LG-A6GG-01	0.667	1
TCGA-02-0269-01	0.666	1
TCGA-W3-AA1O-06	0.664	1
TCGA-14-1452-01	0.663	1
TCGA-GV-A3QF-01	0.662	1
TCGA-02-0113-01	0.662	1
TCGA-BH-A0B2-01	0.659	1
TCGA-EO-A3AS-01	0.656	1
TCGA-N9-A4Q8-01	0.655	1
TCGA-N5-A4RV-01	0.654	1
TCGA-D3-A8GM-06	0.654	1
TCGA-DD-A3A1-01	0.654	1
TCGA-13-2065-01	0.653	2
TCGA-EK-A2PK-01	0.653	1
TCGA-61-1899-01	0.653	1
TCGA-EE-A29D-06	0.65	1
TCGA-EE-A2GB-06	0.649	1
TCGA-61-2088-01	0.649	1
TCGA-14-0783-01	0.649	1
TCGA-63-A5ML-01	0.648	1
TCGA-N9-A4Q1-01	0.647	1
TCGA-2F-A9KO-01	0.643	1
TCGA-HZ-7289-01	0.642	1
TCGA-EA-A5ZF-01	0.64	1
TCGA-E7-A5KE-01	0.64	1
TCGA-14-0817-01	0.64	1
TCGA-09-2054-01	0.635	1
TCGA-DX-A3UA-01	0.634	1
TCGA-2G-AALO-01	0.634	1
TCGA-AF-2693-01	0.632	1
TCGA-29-1775-01	0.632	1
TCGA-A8-A06X-01	0.631	1
TCGA-10-0935-01	0.631	1
TCGA-24-2033-01	0.63	1
TCGA-72-4237-01	0.63	1
TCGA-2Y-A9H2-01	0.629	1
TCGA-D8-A140-01	0.629	1
TCGA-C5-A1BM-01	0.626	1
TCGA-KD-A5QS-01	0.623	1
TCGA-G3-A7M6-01	0.622	1
TCGA-06-0182-01	0.62	1
TCGA-XP-A8T6-01	0.619	1
TCGA-13-0885-01	0.618	1
TCGA-EY-A1GR-01	0.618	1
TCGA-AJ-A3TW-01	0.61	2
TCGA-AC-A5XS-01	0.608	1
TCGA-2G-AAFN-01	0.608	1
TCGA-HU-A4GF-01	0.607	1
TCGA-DU-8165-01	0.605	1
TCGA-W5-AA2Z-01	0.603	1
TCGA-67-6217-01	0.601	1
TCGA-2G-AAL5-01	0.599	1
TCGA-NA-A4QY-01	0.599	1
TCGA-86-8074-01	0.598	1
TCGA-04-1338-01	0.598	1
TCGA-WE-A8ZY-06	0.597	1
TCGA-13-1506-01	0.597	1
TCGA-42-2588-01	0.597	1
TCGA-BH-A0BT-01	0.596	1
TCGA-2G-AAGY-01	0.596	1
TCGA-09-2049-01	0.596	1
TCGA-KD-A5QU-01	0.595	1
TCGA-04-1516-01	0.595	1
TCGA-24-1557-01	0.594	1
TCGA-FS-A1ZU-06	0.593	1
TCGA-FS-A4F2-06	0.593	1
TCGA-HZ-A9TJ-01	0.589	1
TCGA-PN-A8MA-01	0.588	1
TCGA-IE-A3OV-01	0.586	1
TCGA-78-8655-01	0.586	1
TCGA-04-1351-01	0.585	1
TCGA-06-0133-01	0.584	1
TCGA-A8-A06Z-01	0.583	1
TCGA-24-1417-01	0.583	1
TCGA-UY-A9PD-01	0.582	2
TCGA-24-1553-01	0.58	1
TCGA-A2-A0YH-01	0.579	1
TCGA-78-7536-01	0.579	1
TCGA-FS-A4FC-06	0.578	2
TCGA-UD-AABZ-01	0.577	1
TCGA-06-0195-01	0.577	1
TCGA-EE-A3J7-06	0.575	1
TCGA-A8-A07O-01	0.573	1
TCGA-33-4587-01	0.572	1
TCGA-E2-A15A-01	0.572	1
TCGA-24-1920-01	0.572	1
TCGA-04-1536-01	0.571	1
TCGA-13-0760-01	0.571	1
TCGA-GC-A3RB-01	0.567	1
TCGA-61-1906-01	0.567	1
TCGA-90-7964-01	0.566	1
TCGA-DY-A1DF-01	0.565	1
TCGA-32-5222-01	0.562	1
TCGA-CN-6012-01	0.561	1
TCGA-ZF-AA51-01	0.561	1
TCGA-LL-A5YN-01	0.56	1
TCGA-24-1556-01	0.56	1
TCGA-FT-A3EE-01	0.557	1
TCGA-E1-A7YD-01	0.555	1
TCGA-D8-A13Z-01	0.554	1
TCGA-N7-A59B-01	0.554	1
TCGA-HE-7130-01	0.554	1
TCGA-09-0364-01	0.553	1
TCGA-D8-A143-01	0.549	1
TCGA-24-2280-01	0.549	1
TCGA-BH-A0DL-01	0.548	1
TCGA-HB-A43Z-01	0.547	1
TCGA-61-2104-01	0.547	1
TCGA-GC-A4ZW-01	0.546	1
TCGA-GS-A9TY-01	0.546	1
TCGA-F4-6459-01	0.545	1
TCGA-EE-A2GI-06	0.545	1
TCGA-DD-A39Y-01	0.545	1
TCGA-55-7573-01	0.544	1
TCGA-3B-A9I1-01	0.544	1
TCGA-YU-A90W-01	0.543	1
TCGA-AG-A02G-01	0.543	1
TCGA-DI-A1NO-01	0.543	1
TCGA-20-0990-01	0.542	1
TCGA-EW-A1PB-01	0.541	1
TCGA-04-1542-01	0.541	1
TCGA-AO-A124-01	0.54	1
TCGA-BH-A0AU-01	0.539	1
TCGA-ED-A82E-01	0.539	1
TCGA-JX-A3Q8-01	0.538	1
TCGA-L5-A43I-01	0.538	1
TCGA-AC-A7VC-01	0.536	1
TCGA-DM-A28F-01	0.536	1
TCGA-JX-A5QV-01	0.535	1
TCGA-EK-A2R7-01	0.535	1
TCGA-12-0619-01	0.534	1
TCGA-12-3653-01	0.534	1
TCGA-EE-A29E-06	0.533	1
TCGA-EE-A2MM-06	0.533	1
TCGA-KP-A3W3-01	0.53	1
TCGA-DD-AACO-01	0.53	1
TCGA-30-1867-01	0.53	1
TCGA-5B-A90C-01	0.529	1
TCGA-AR-A24Z-01	0.529	1
TCGA-23-2077-01	0.528	1
TCGA-K1-A6RV-01	0.527	1
TCGA-HS-A5N9-01	0.527	1
TCGA-VS-A959-01	0.525	1
TCGA-C5-A8YR-01	0.524	1
TCGA-PG-A914-01	0.524	1
TCGA-FD-A5C0-01	0.523	1
TCGA-BH-A0BG-01	0.523	1
TCGA-DU-A5TT-01	0.523	1
TCGA-24-1431-01	0.523	1
TCGA-06-2557-01	0.522	1
TCGA-14-1454-01	0.522	1
TCGA-UY-A8OB-01	0.521	1
TCGA-91-6847-01	0.519	1
TCGA-EE-A2MD-06	0.519	1
TCGA-E2-A14T-01	0.518	1
TCGA-04-1364-01	0.518	1
TCGA-JW-AAVH-01	0.517	1
TCGA-4G-AAZT-01	0.517	1
TCGA-09-0369-01	0.517	1
TCGA-G4-6298-01	0.516	1
TCGA-2G-AAKH-01	0.515	1
TCGA-B5-A5OD-01	0.514	1
TCGA-04-1649-01	0.514	1
TCGA-ZM-AA0N-01	0.514	1
TCGA-E6-A8L9-01	0.513	1
TCGA-GN-A266-06	0.513	1
TCGA-W3-A825-06	0.511	1
TCGA-2Y-A9GZ-01	0.511	1
TCGA-E2-A1IJ-01	0.51	1
TCGA-CM-5348-01	0.508	1
TCGA-VS-A9UA-01	0.507	1
TCGA-24-2271-01	0.506	1
TCGA-AP-A5FX-01	0.505	1
TCGA-55-8514-01	0.505	1
TCGA-09-2051-01	0.505	1
TCGA-SI-A71O-01	0.505	1
TCGA-05-5428-01	0.505	1
TCGA-L5-A893-01	0.503	1
TCGA-E7-A85H-01	0.503	1
TCGA-G3-A3CK-01	0.503	1
TCGA-CC-A7IK-01	0.503	1
TCGA-EK-A2RN-01	0.502	1
TCGA-D3-A5GO-06	0.502	1
TCGA-29-1764-01	0.502	1
TCGA-30-1856-01	0.501	1
TCGA-MN-A4N1-01	0.499	1
TCGA-24-1847-01	0.499	1
TCGA-60-2711-01	0.498	1
TCGA-A2-A3XZ-01	0.498	1
TCGA-AA-3851-01	0.498	1
TCGA-73-4676-01	0.497	1
TCGA-L5-A8NN-01	0.496	1
TCGA-EA-A3HT-01	0.495	1
TCGA-CN-A6V6-01	0.495	1
TCGA-ZG-A9L5-01	0.494	1
TCGA-VR-A8EZ-01	0.494	1
TCGA-A1-A0SM-01	0.493	1
TCGA-2G-AAGF-01	0.493	1
TCGA-CU-A0YR-01	0.493	1
TCGA-E2-A14R-01	0.493	1
TCGA-06-1084-01	0.491	1
TCGA-26-6173-01	0.491	1
TCGA-N5-A59E-01	0.49	1
TCGA-K4-A3WV-01	0.49	1
TCGA-S6-A8JY-01	0.49	1
TCGA-DD-AADD-01	0.49	1
TCGA-FI-A2EW-01	0.49	1
TCGA-AO-A03N-01	0.489	1
TCGA-A8-A08G-01	0.489	1
TCGA-CM-5862-01	0.487	1
TCGA-DK-AA6R-01	0.486	1
TCGA-5X-AA5U-01	0.486	1
TCGA-29-2414-01	0.485	1
TCGA-02-0069-01	0.485	1
TCGA-KQ-A41Q-01	0.484	1
TCGA-KK-A8I4-01	0.484	1
TCGA-MA-AA3X-01	0.483	1
TCGA-DF-A2KR-01	0.483	1
TCGA-CG-4449-01	0.482	2
TCGA-AC-A62X-01	0.482	1
TCGA-13-A5FU-01	0.482	1
TCGA-C8-A27B-01	0.481	1
TCGA-EY-A54A-01	0.479	1
TCGA-C8-A1HN-01	0.478	1
TCGA-BK-A4ZD-01	0.477	1
TCGA-D9-A6EC-06	0.477	1
TCGA-20-0987-01	0.477	1
TCGA-A2-A1G0-01	0.477	1
TCGA-5T-A9QA-01	0.476	1
TCGA-13-0723-01	0.476	1
TCGA-B6-A0X7-01	0.475	1
TCGA-GF-A6C9-06	0.475	1
TCGA-AX-A0IW-01	0.475	1
TCGA-DX-A6YU-01	0.473	1
TCGA-FS-A4F5-06	0.473	1
TCGA-GI-A2C8-01	0.471	1
TCGA-IF-A4AJ-01	0.47	1
TCGA-ED-A459-01	0.469	1
TCGA-62-8399-01	0.469	1
TCGA-2G-AAH8-01	0.468	1
TCGA-78-7160-01	0.467	2
TCGA-AO-A1KT-01	0.467	1
TCGA-XY-A8S2-01	0.466	1
TCGA-DX-A8BS-01	0.465	1
TCGA-05-5429-01	0.465	1
TCGA-UB-AA0U-01	0.465	1
TCGA-BR-4371-01	0.464	1
TCGA-QB-AA9O-06	0.464	1
TCGA-A2-A0ST-01	0.463	2
TCGA-HM-A4S6-01	0.463	1
TCGA-25-2392-01	0.463	1
TCGA-BH-A0EB-01	0.462	1
TCGA-78-7535-01	0.462	1
TCGA-14-1823-01	0.461	1
TCGA-DX-AB2E-01	0.461	1
TCGA-04-1646-01	0.461	1
TCGA-A2-A04T-01	0.46	1
TCGA-24-1560-01	0.46	1
TCGA-D8-A1XM-01	0.459	1
TCGA-E2-A150-01	0.459	1
TCGA-HQ-A5ND-01	0.457	1
TCGA-09-0366-01	0.457	1
TCGA-DD-AAD8-01	0.457	1
TCGA-55-A494-01	0.455	1
TCGA-MB-A8JK-01	0.454	1
TCGA-EA-A97N-01	0.453	1
TCGA-SH-A7BH-01	0.453	1
TCGA-ZH-A8Y8-01	0.452	1
TCGA-BT-A2LA-01	0.452	1
TCGA-34-5240-01	0.452	1
TCGA-NC-A5HD-01	0.451	1
TCGA-WE-A8K1-06	0.45	1
TCGA-DK-A2I2-01	0.449	1
TCGA-N9-A4Q4-01	0.448	1
TCGA-Q1-A5R2-01	0.447	1
TCGA-K6-A3WQ-01	0.447	1
TCGA-G2-AA3B-01	0.447	1
TCGA-DU-7290-01	0.447	1
TCGA-CS-4941-01	0.447	1
TCGA-DD-AACB-01	0.447	1
TCGA-23-1114-01	0.446	1
TCGA-D8-A27W-01	0.446	1
TCGA-04-1525-01	0.445	1
TCGA-BW-A5NO-01	0.444	1
TCGA-78-7159-01	0.443	1
TCGA-4G-AAZO-01	0.439	1
TCGA-44-7662-01	0.439	1
TCGA-23-1117-01	0.439	1
TCGA-A5-A0G5-01	0.439	1
TCGA-VR-AA7B-01	0.438	1
TCGA-J2-A4AD-01	0.438	1
TCGA-38-4629-01	0.437	1
TCGA-AG-3587-01	0.436	1
TCGA-2G-AAKG-01	0.435	1
TCGA-86-7713-01	0.435	1
TCGA-22-4595-01	0.434	1
TCGA-5P-A9K9-01	0.434	1
TCGA-BR-4357-01	0.434	1
TCGA-AC-A2BM-01	0.434	1
TCGA-WK-A8Y0-01	0.434	1
TCGA-LL-A73Y-01	0.432	1
TCGA-R6-A6XG-01	0.431	1
TCGA-AL-A5DJ-01	0.43	1
TCGA-AQ-A04L-01	0.43	1
TCGA-2G-AAFI-01	0.43	1
TCGA-AO-A0J2-01	0.427	1
TCGA-44-7669-01	0.427	1
TCGA-BG-A0M6-01	0.427	1
TCGA-14-0867-01	0.426	1
TCGA-61-2102-01	0.424	1
TCGA-IQ-A61K-01	0.424	1
TCGA-UY-A78N-01	0.423	1
TCGA-UD-AAC6-01	0.421	1
TCGA-FD-A3SJ-01	0.421	1
TCGA-GN-A4U3-06	0.42	1
TCGA-34-A5IX-01	0.419	1
TCGA-UY-A8OC-01	0.419	1
TCGA-D3-A2JA-06	0.419	1
TCGA-06-0177-01	0.419	1
TCGA-61-1730-01	0.419	1
TCGA-A2-A0D4-01	0.418	1
TCGA-E9-A2JS-01	0.418	1
TCGA-IR-A3LL-01	0.417	1
TCGA-BC-A112-01	0.417	1
TCGA-EK-A2RJ-01	0.416	1
TCGA-59-2351-01	0.415	1
TCGA-A2-A0YI-01	0.414	1
TCGA-BR-A4CR-01	0.413	1
TCGA-D1-A16I-01	0.413	1
TCGA-09-1668-01	0.412	1
TCGA-32-1987-01	0.412	1
TCGA-PK-A5HC-01	0.412	1
TCGA-JW-A5VK-01	0.411	1
TCGA-06-0209-01	0.411	1
TCGA-C5-A1ML-01	0.41	1
TCGA-BH-A0EE-01	0.41	1
TCGA-DM-A28M-01	0.41	1
TCGA-24-1474-01	0.41	1
TCGA-A2-A3KC-01	0.409	1
TCGA-EA-A5ZD-01	0.408	1
TCGA-XF-AAMY-01	0.408	1
TCGA-VQ-A922-01	0.408	1
TCGA-FI-A2F8-01	0.406	2
TCGA-GC-A6I3-01	0.406	1
TCGA-A8-A06Q-01	0.406	1
TCGA-DG-A2KL-01	0.405	1
TCGA-PG-A7D5-01	0.404	1
TCGA-06-0188-01	0.403	1
TCGA-DK-A3IM-01	0.402	1
TCGA-A7-A4SE-01	0.402	1
TCGA-EW-A1P8-01	0.402	1
TCGA-A2-A04Y-01	0.402	1
TCGA-25-1329-01	0.402	1
TCGA-EW-A423-01	0.401	1
TCGA-73-4668-01	0.401	1
TCGA-SH-A7BC-01	0.399	1
TCGA-06-1087-01	0.399	1
TCGA-38-4632-01	0.398	1
TCGA-G3-A25W-01	0.398	1
TCGA-EA-A439-01	0.397	1
TCGA-C5-A1MK-01	0.397	1
TCGA-A7-A13D-01	0.397	1
TCGA-04-1346-01	0.397	1
TCGA-44-A47B-01	0.396	1
TCGA-AR-A24W-01	0.396	1
TCGA-CC-A9FU-01	0.396	1
TCGA-AD-6888-01	0.394	1
TCGA-EE-A3AB-06	0.394	1
TCGA-LN-A4MR-01	0.394	1
TCGA-13-0751-01	0.394	1
TCGA-C5-A1M7-01	0.393	1
TCGA-28-2509-01	0.393	1
TCGA-XF-AAMG-01	0.392	1
TCGA-KP-A3W1-01	0.392	1
TCGA-64-1681-01	0.391	1
TCGA-HB-A3YV-01	0.39	1
TCGA-29-2425-01	0.39	1
TCGA-22-1016-01	0.388	1
TCGA-QH-A6CV-01	0.386	1
TCGA-CZ-4858-01	0.386	1
TCGA-BH-A18V-01	0.385	1
TCGA-VQ-A91U-01	0.383	1
TCGA-09-1659-01	0.383	1
TCGA-DD-AAVV-01	0.382	1
TCGA-97-A4M1-01	0.382	1
TCGA-AX-A3G3-01	0.381	1
TCGA-D3-A3C1-06	0.38	1
TCGA-A2-A0D0-01	0.38	1
TCGA-50-5944-01	0.38	1
TCGA-44-3917-01	0.38	1
TCGA-FD-A5BU-01	0.379	1
TCGA-44-6779-01	0.379	1
TCGA-13-0717-01	0.379	1
TCGA-XF-AAN7-01	0.378	1
TCGA-43-A475-01	0.377	1
TCGA-OL-A6VO-01	0.377	1
TCGA-DQ-5625-01	0.376	1
TCGA-AP-A3K1-01	0.376	1
TCGA-08-0386-01	0.376	1
TCGA-BG-A0YV-01	0.375	1
TCGA-EE-A2GL-06	0.374	2
TCGA-CN-4727-01	0.374	1
TCGA-G3-A7M9-01	0.374	1
TCGA-10-0938-01	0.373	1
TCGA-BC-A10Q-01	0.373	1
TCGA-D8-A1JF-01	0.373	1
TCGA-78-7147-01	0.371	1
TCGA-24-2281-01	0.37	1
TCGA-55-8096-01	0.369	1
TCGA-WE-AAA0-06	0.369	1
TCGA-06-0152-01	0.369	1
TCGA-C5-A7CJ-01	0.368	1
TCGA-E1-5304-01	0.368	1
TCGA-DF-A2KS-01	0.368	1
TCGA-4Z-AA7W-01	0.367	1
TCGA-A7-A26H-01	0.367	1
TCGA-ZJ-AAXD-01	0.366	1
TCGA-LP-A4AU-01	0.366	1
TCGA-C5-A8YQ-01	0.365	1
TCGA-D5-6922-01	0.365	1
TCGA-EE-A29X-06	0.363	2
TCGA-C5-A1M6-01	0.363	1
TCGA-EJ-7784-01	0.363	1
TCGA-24-1436-01	0.363	1
TCGA-13-2061-01	0.363	1
TCGA-EK-A2PM-01	0.362	1
TCGA-C5-A1MH-01	0.361	1
TCGA-EW-A6SB-01	0.361	1
TCGA-W3-AA1W-06	0.36	1
TCGA-86-8280-01	0.36	1
TCGA-04-1343-01	0.36	1
TCGA-13-0795-01	0.359	1
TCGA-04-1517-01	0.357	1
TCGA-DK-AA6U-01	0.356	1
TCGA-55-1592-01	0.356	1
TCGA-BR-8286-01	0.356	1
TCGA-78-8640-01	0.356	1
TCGA-72-4234-01	0.356	1
TCGA-G5-6641-01	0.355	1
TCGA-BR-A4J8-01	0.355	1
TCGA-C5-A1MJ-01	0.355	1
TCGA-B5-A3S1-01	0.354	1
TCGA-13-0803-01	0.354	1
TCGA-KB-A6F7-01	0.353	1
TCGA-06-6698-01	0.353	1
TCGA-08-0350-01	0.351	1
TCGA-05-4424-01	0.35	1
TCGA-L5-A4OM-01	0.349	1
TCGA-CM-5864-01	0.349	1
TCGA-GV-A6ZA-01	0.348	1
TCGA-AO-A12D-01	0.348	1
TCGA-10-0930-01	0.348	1
TCGA-EA-A411-01	0.347	1
TCGA-LN-A9FO-01	0.347	1
TCGA-13-0911-01	0.347	1
TCGA-D3-A2JO-06	0.347	1
TCGA-78-7150-01	0.346	1
TCGA-HB-A2OT-01	0.346	1
TCGA-28-5216-01	0.346	1
TCGA-13-1481-01	0.346	1
TCGA-75-5147-01	0.346	1
TCGA-MP-A4TC-01	0.345	1
TCGA-X6-A7W8-01	0.345	1
TCGA-EE-A2MU-06	0.345	1
TCGA-DX-A3LT-01	0.344	1
TCGA-02-0106-01	0.344	1
TCGA-AN-A0FY-01	0.343	1
TCGA-CR-6482-01	0.343	1
TCGA-CR-6487-01	0.342	1
TCGA-DK-AA75-01	0.341	1
TCGA-A3-3372-01	0.34	1
TCGA-29-1784-01	0.338	1
TCGA-CV-7423-01	0.337	1
TCGA-ZF-AA52-01	0.337	1
TCGA-05-4427-01	0.336	1
TCGA-SL-A6J9-01	0.336	1
TCGA-55-7281-01	0.335	1
TCGA-21-5787-01	0.335	1
TCGA-AJ-A3EJ-01	0.335	1
TCGA-C8-A1HM-01	0.335	1
TCGA-G9-6499-01	0.335	1
TCGA-N6-A4VF-01	0.334	1
TCGA-GU-AATO-01	0.334	1
TCGA-C5-A2LZ-01	0.334	1
TCGA-FX-A2QS-01	0.333	1
TCGA-VQ-A94R-01	0.333	1
TCGA-B6-A0IJ-01	0.333	1
TCGA-VR-A8EU-01	0.332	1
TCGA-FU-A40J-01	0.332	1
TCGA-44-6775-01	0.331	1
TCGA-ZX-AA5X-01	0.33	1
TCGA-ZD-A8I3-01	0.33	1
TCGA-2J-AABP-01	0.33	1
TCGA-29-1707-01	0.33	1
TCGA-SN-A84Y-01	0.329	1
TCGA-62-A46O-01	0.328	1
TCGA-W5-AA31-01	0.328	1
TCGA-ER-A3PL-06	0.327	1
TCGA-CS-6665-01	0.327	1
TCGA-LL-A441-01	0.326	1
TCGA-57-1585-01	0.326	1
TCGA-SG-A849-01	0.326	1
TCGA-DX-AB2Z-01	0.325	1
TCGA-ZF-AA4T-01	0.323	1
TCGA-2G-AAFH-01	0.322	1
TCGA-13-2057-01	0.321	1
TCGA-86-8585-01	0.32	1
TCGA-DD-A73G-01	0.32	1
TCGA-36-2533-01	0.32	1
TCGA-QK-A8Z9-01	0.319	1
TCGA-E9-A22E-01	0.319	1
TCGA-XF-A9SK-01	0.318	1
TCGA-LL-A5YP-01	0.318	1
TCGA-BT-A20R-01	0.317	1
TCGA-AN-A0XP-01	0.317	1
TCGA-FD-A3SR-01	0.316	1
TCGA-BH-A18H-01	0.315	1
TCGA-CV-7415-01	0.314	1
TCGA-AC-A2QJ-01	0.314	1
TCGA-EW-A1PH-01	0.314	1
TCGA-HR-A2OH-06	0.314	1
TCGA-08-0349-01	0.314	1
TCGA-RC-A6M3-01	0.313	1
TCGA-ZG-A9LZ-01	0.313	1
TCGA-WK-A8XS-01	0.312	1
TCGA-44-7660-01	0.31	1
TCGA-55-7914-01	0.31	1
TCGA-04-1332-01	0.309	1
TCGA-37-4141-01	0.309	1
TCGA-N8-A4PO-01	0.308	1
TCGA-19-4065-01	0.307	1
TCGA-D3-A2JC-06	0.307	1
TCGA-EE-A3JA-06	0.307	1
TCGA-06-0414-01	0.307	1
TCGA-FI-A3PV-01	0.306	1
TCGA-C8-A138-01	0.305	1
TCGA-P6-A5OG-01	0.305	1
TCGA-CV-7255-01	0.304	1
TCGA-08-0531-01	0.304	1
TCGA-D8-A1XQ-01	0.303	1
TCGA-DQ-7596-01	0.303	1
TCGA-ZJ-AAXI-01	0.302	1
TCGA-AR-A1AI-01	0.302	1
TCGA-78-7542-01	0.302	1
TCGA-44-2659-01	0.301	1
TCGA-DU-6392-01	0.3	1
TCGA-CV-A45X-01	0.299	1
TCGA-AC-A6IW-01	0.299	1
TCGA-35-4123-01	0.298	1
TCGA-23-2072-01	0.298	1
TCGA-N5-A4RD-01	0.297	1
TCGA-63-5131-01	0.297	1
TCGA-C5-A7X8-01	0.297	1
TCGA-06-0216-01	0.296	1
TCGA-DX-A8BG-01	0.295	1
TCGA-HI-7168-01	0.295	1
TCGA-39-5035-01	0.295	1
TCGA-A5-A1OG-01	0.294	1
TCGA-FD-A43N-01	0.293	1
TCGA-46-3769-01	0.293	1
TCGA-2H-A9GO-01	0.293	1
TCGA-IG-A51D-01	0.292	1
TCGA-ZF-AA53-01	0.291	1
TCGA-D9-A3Z1-06	0.291	1
TCGA-CD-8529-01	0.291	1
TCGA-P3-A6SX-01	0.29	1
TCGA-CV-A45R-01	0.29	1
TCGA-FD-A3SL-01	0.29	1
TCGA-LL-A73Z-01	0.29	1
TCGA-EE-A2MR-06	0.29	1
TCGA-B5-A1MY-01	0.29	1
TCGA-AR-A0U2-01	0.289	1
TCGA-EY-A2ON-01	0.289	1
TCGA-K4-A5RI-01	0.288	1
TCGA-32-2632-01	0.288	1
TCGA-VS-A9UD-01	0.287	1
TCGA-P3-A6T3-01	0.287	1
TCGA-BA-5149-01	0.287	1
TCGA-55-6980-01	0.287	1
TCGA-BT-A20W-01	0.287	1
TCGA-GC-A3YS-01	0.286	1
TCGA-N5-A4RM-01	0.286	1
TCGA-DD-AAW1-01	0.286	1
TCGA-DD-AACV-01	0.286	1
TCGA-44-A4SU-01	0.285	1
TCGA-BH-A1EU-01	0.284	1
TCGA-05-4420-01	0.284	1
TCGA-R2-A69V-01	0.282	1
TCGA-06-0206-01	0.282	1
TCGA-IE-A6BZ-01	0.281	1
TCGA-66-2742-01	0.281	1
TCGA-02-0332-01	0.281	1
TCGA-24-1852-01	0.281	1
TCGA-AA-3552-01	0.281	1
TCGA-K4-A4AC-01	0.28	1
TCGA-D8-A1XK-01	0.279	1
TCGA-19-1786-01	0.279	1
TCGA-98-A53J-01	0.277	1
TCGA-LN-A49L-01	0.277	1
TCGA-E2-A3DX-01	0.276	1
TCGA-2G-AALG-01	0.275	1
TCGA-TM-A84I-01	0.275	1
TCGA-R6-A8WG-01	0.275	1
TCGA-32-4210-01	0.274	1
TCGA-AC-A5EI-01	0.274	1
TCGA-OL-A5RW-01	0.273	1
TCGA-H7-A76A-01	0.271	1
TCGA-E2-A159-01	0.27	1
TCGA-HR-A2OG-06	0.27	1
TCGA-EE-A3AG-06	0.27	1
TCGA-GV-A3JV-01	0.269	1
TCGA-86-8075-01	0.268	1
TCGA-AJ-A3QS-01	0.268	1
TCGA-61-1741-01	0.268	1
TCGA-90-A4ED-01	0.267	1
TCGA-12-0826-01	0.267	1
TCGA-AC-A3W5-01	0.266	1
TCGA-DK-A2I4-01	0.265	1
TCGA-RU-A8FL-01	0.265	1
TCGA-A2-A04W-01	0.264	1
TCGA-CV-7261-01	0.264	1
TCGA-13-1499-01	0.264	1
TCGA-FS-A1ZQ-06	0.264	1
TCGA-D3-A2JD-06	0.264	1
TCGA-10-0931-01	0.264	1
TCGA-60-2723-01	0.264	1
TCGA-12-1099-01	0.262	1
TCGA-CD-8530-01	0.261	1
TCGA-F7-8298-01	0.26	1
TCGA-DX-AATS-01	0.26	1
TCGA-2G-AAFY-01	0.26	1
TCGA-KF-A41W-01	0.258	1
TCGA-ZM-AA0H-01	0.258	1
TCGA-97-7546-01	0.258	1
TCGA-CK-5912-01	0.258	1
TCGA-DX-A8BJ-01	0.257	1
TCGA-SG-A6Z7-01	0.257	1
TCGA-L5-A891-01	0.257	1
TCGA-A1-A0SP-01	0.257	1
TCGA-A2-A3Y0-01	0.257	1
TCGA-14-3477-01	0.257	1
TCGA-NF-A4X2-01	0.256	1
TCGA-B8-5551-01	0.256	1
TCGA-FR-A44A-06	0.256	1
TCGA-63-A5MH-01	0.255	1
TCGA-D8-A1JL-01	0.254	1
TCGA-97-7553-01	0.254	1
TCGA-13-1504-01	0.254	1
TCGA-DX-A3M2-01	0.253	1
TCGA-2G-AAG0-01	0.253	1
TCGA-R6-A6KZ-01	0.252	1
TCGA-VQ-A8E0-01	0.252	1
TCGA-BS-A0U9-01	0.252	1
TCGA-42-2587-01	0.251	1
TCGA-91-6831-01	0.25	1
TCGA-24-1842-01	0.25	1
TCGA-LL-A6FR-01	0.249	1
TCGA-NA-A4R0-01	0.249	1
TCGA-G3-A5SI-01	0.247	1
TCGA-13-1477-01	0.246	1
TCGA-24-1924-01	0.246	1
TCGA-VS-A9UL-01	0.245	1
TCGA-4Z-AA86-01	0.245	1
TCGA-J9-A52E-01	0.245	1
TCGA-MP-A4TF-01	0.245	1
TCGA-AO-A128-01	0.245	1
TCGA-FD-A43Y-01	0.244	1
TCGA-VR-A8EW-01	0.244	1
TCGA-AR-A24L-01	0.243	1
TCGA-A8-A079-01	0.243	1
TCGA-DD-A1EJ-01	0.243	1
TCGA-36-2545-01	0.243	1
TCGA-49-AARN-01	0.242	1
TCGA-VQ-A94U-01	0.242	1
TCGA-BR-A4J1-01	0.242	1
TCGA-13-0757-01	0.242	1
TCGA-CI-6624-01	0.241	1
TCGA-BR-A4PD-01	0.241	1
TCGA-29-1761-01	0.241	1
TCGA-DX-AB2P-01	0.24	1
TCGA-06-0409-01	0.24	1
TCGA-25-2398-01	0.239	1
TCGA-06-0410-01	0.239	1
TCGA-44-8119-01	0.238	1
TCGA-24-1549-01	0.238	1
TCGA-BH-A0E6-01	0.237	1
TCGA-L7-A56G-01	0.237	1
TCGA-EE-A2MJ-06	0.237	1
TCGA-XU-A930-01	0.236	1
TCGA-D3-A8GO-06	0.236	1
TCGA-49-AAR0-01	0.236	1
TCGA-FU-A23L-01	0.235	1
TCGA-EW-A2FR-01	0.235	1
TCGA-2G-AAFO-01	0.235	1
TCGA-B0-4713-01	0.235	1
TCGA-FS-A1ZH-06	0.234	1
TCGA-A2-A0SW-01	0.234	1
TCGA-Z6-A8JE-01	0.233	1
TCGA-L5-A8NS-01	0.233	1
TCGA-D9-A1X3-06	0.233	1
TCGA-2G-AAFM-01	0.233	1
TCGA-37-3792-01	0.233	1
TCGA-A8-A09K-01	0.233	1
TCGA-DQ-7588-01	0.232	1
TCGA-02-0001-01	0.232	1
TCGA-BH-A0B3-01	0.231	1
TCGA-24-2019-01	0.231	1
TCGA-A7-A26F-01	0.23	1
TCGA-AN-A0FL-01	0.23	1
TCGA-B6-A408-01	0.229	1
TCGA-2G-AAGW-01	0.229	1
TCGA-61-1728-01	0.228	1
TCGA-77-8008-01	0.227	1
TCGA-D8-A27R-01	0.227	1
TCGA-24-1464-01	0.227	1
TCGA-23-1124-01	0.227	1
TCGA-T2-A6X0-01	0.226	1
TCGA-FD-A3SP-01	0.225	1
TCGA-BK-A139-01	0.225	1
TCGA-YU-A90P-01	0.224	1
TCGA-G3-AAV1-01	0.224	1
TCGA-EK-A2RM-01	0.223	1
TCGA-DK-A3IK-01	0.223	1
TCGA-37-4130-01	0.222	1
TCGA-DD-A11A-01	0.221	1
TCGA-DK-AA6S-01	0.219	1
TCGA-P3-A5Q5-01	0.219	1
TCGA-A7-A13F-01	0.219	1
TCGA-EW-A1OV-01	0.219	1
TCGA-30-1866-01	0.219	1
TCGA-ZF-AA58-01	0.218	1
TCGA-MA-AA43-01	0.218	1
TCGA-A2-A0CT-01	0.218	1
TCGA-B6-A409-01	0.217	1
TCGA-BC-A10U-01	0.217	1
TCGA-BS-A0TI-01	0.217	1
TCGA-3C-AAAU-01	0.216	1
TCGA-53-7626-01	0.216	1
TCGA-55-8206-01	0.216	1
TCGA-XM-A8RD-01	0.216	1
TCGA-MY-A5BE-01	0.215	1
TCGA-A7-A6VX-01	0.215	1
TCGA-62-8398-01	0.215	1
TCGA-BW-A5NQ-01	0.215	1
TCGA-12-3646-01	0.215	1
TCGA-BB-8596-01	0.214	1
TCGA-BA-6872-01	0.213	1
TCGA-38-6178-01	0.213	1
TCGA-HU-A4GP-01	0.213	1
TCGA-BI-A0VR-01	0.211	1
TCGA-97-A4M7-01	0.211	1
TCGA-V4-A9F4-01	0.211	1
TCGA-85-A50M-01	0.209	1
TCGA-GD-A3OP-01	0.209	1
TCGA-W4-A7U4-01	0.209	1
TCGA-15-1449-01	0.209	1
TCGA-49-4505-01	0.208	1
TCGA-50-6593-01	0.208	1
TCGA-2H-A9GH-01	0.208	1
TCGA-BG-A18C-01	0.208	1
TCGA-DC-6156-01	0.207	1
TCGA-55-A57B-01	0.207	1
TCGA-05-4402-01	0.206	1
TCGA-UC-A7PG-01	0.205	1
TCGA-HN-A2OB-01	0.205	1
TCGA-66-2759-01	0.205	1
TCGA-64-5781-01	0.205	1
TCGA-DD-AADR-01	0.205	1
TCGA-AP-A052-01	0.205	1
TCGA-KQ-A41P-01	0.204	1
TCGA-R6-A6DN-01	0.204	1
TCGA-EE-A29G-06	0.204	1
TCGA-XY-A9T9-01	0.203	1
TCGA-CN-6989-01	0.202	1
TCGA-25-1626-01	0.202	1
TCGA-G2-A3IE-01	0.202	1
TCGA-ED-A7XO-01	0.202	1
TCGA-AJ-A3NH-01	0.201	1
TCGA-MM-A564-01	0.201	1
TCGA-DD-A4NJ-01	0.201	1
TCGA-MB-A5Y8-01	0.2	1
TCGA-13-1407-01	0.2	1
TCGA-HF-7131-01	0.199	1
TCGA-YF-AA3M-01	0.198	1
TCGA-86-8055-01	0.198	1
TCGA-OL-A5D7-01	0.198	1
TCGA-24-1434-01	0.198	1
TCGA-VS-A9U5-01	0.198	1
TCGA-DK-A3IL-01	0.197	1
TCGA-HN-A2NL-01	0.197	1
TCGA-94-7557-01	0.196	1
TCGA-34-8455-01	0.196	1
TCGA-S9-A6WM-01	0.196	1
TCGA-AR-A24K-01	0.196	1
TCGA-E1-A7YQ-01	0.196	1
TCGA-44-2662-01	0.196	1
TCGA-ZF-AA4X-01	0.195	1
TCGA-61-2612-01	0.195	1
TCGA-50-5941-01	0.194	1
TCGA-UB-A7MF-01	0.194	1
TCGA-W3-A828-06	0.193	1
TCGA-E2-A14V-01	0.193	1
TCGA-2G-AAGP-01	0.193	1
TCGA-49-6742-01	0.193	1
TCGA-ZM-AA06-01	0.192	1
TCGA-06-0237-01	0.192	1
TCGA-19-1388-01	0.192	1
TCGA-E9-A1ND-01	0.191	1
TCGA-D9-A6E9-06	0.191	1
TCGA-CV-5444-01	0.19	1
TCGA-2G-AAEX-01	0.19	1
TCGA-EO-A3KU-01	0.188	1
TCGA-YG-AA3O-06	0.188	1
TCGA-85-7844-01	0.187	1
TCGA-85-A4JC-01	0.187	1
TCGA-32-1970-01	0.187	1
TCGA-64-1676-01	0.187	1
TCGA-75-7025-01	0.187	1
TCGA-X6-A8C6-01	0.187	1
TCGA-K1-A6RU-01	0.186	1
TCGA-4Z-AA87-01	0.186	1
TCGA-BR-8484-01	0.186	1
TCGA-DX-A3U9-01	0.185	1
TCGA-D7-6820-01	0.185	1
TCGA-BP-4331-01	0.184	1
TCGA-BH-A0C1-01	0.183	1
TCGA-C5-A3HF-01	0.183	1
TCGA-XF-A8HD-01	0.183	1
TCGA-A2-A3XS-01	0.183	1
TCGA-39-5021-01	0.183	1
TCGA-DX-AB35-01	0.182	1
TCGA-06-5856-01	0.181	1
TCGA-EE-A20B-06	0.181	1
TCGA-VT-A80J-01	0.181	1
TCGA-CC-A8HU-01	0.181	1
TCGA-B8-4143-01	0.181	1
TCGA-R6-A6XQ-01	0.18	1
TCGA-12-1090-01	0.18	1
TCGA-BR-A4J5-01	0.179	1
TCGA-GM-A4E0-01	0.179	1
TCGA-D8-A147-01	0.179	1
TCGA-57-1994-01	0.179	1
TCGA-42-2582-01	0.179	1
TCGA-BH-A0DV-01	0.178	1
TCGA-DX-A48K-01	0.178	1
TCGA-25-1318-01	0.178	1
TCGA-FJ-A3Z7-01	0.177	1
TCGA-IN-A6RR-01	0.177	1
TCGA-4K-AA1G-01	0.177	1
TCGA-76-4934-01	0.177	1
TCGA-ZJ-AAXF-01	0.176	1
TCGA-85-6560-01	0.176	1
TCGA-XF-A9SU-01	0.175	1
TCGA-FD-A3SS-01	0.175	1
TCGA-2G-AAKM-01	0.175	1
TCGA-A7-A6VV-01	0.174	1
TCGA-EE-A29W-06	0.174	1
TCGA-A2-A0CM-01	0.174	1
TCGA-AD-6899-01	0.174	1
TCGA-E9-A1N8-01	0.174	1
TCGA-GV-A3JW-01	0.174	1
TCGA-BC-A217-01	0.174	1
TCGA-44-6778-01	0.174	1
TCGA-13-1411-01	0.173	1
TCGA-AK-3430-01	0.173	1
TCGA-AX-A3G6-01	0.172	1
TCGA-85-7699-01	0.172	1
TCGA-IG-A3Y9-01	0.171	1
TCGA-36-1569-01	0.171	1
TCGA-B0-4815-01	0.171	1
TCGA-93-A4JP-01	0.171	1
TCGA-02-0456-01	0.171	1
TCGA-39-5024-01	0.17	1
TCGA-E2-A1II-01	0.17	1
TCGA-GN-A265-06	0.169	1
TCGA-B0-4838-01	0.169	1
TCGA-UC-A7PF-01	0.168	1
TCGA-N9-A4Q7-01	0.168	1
TCGA-CH-5766-01	0.168	1
TCGA-HU-8245-01	0.168	1
TCGA-99-7458-01	0.167	1
TCGA-BP-4771-01	0.167	1
TCGA-EB-A6L9-06	0.167	1
TCGA-DK-A3IN-01	0.166	1
TCGA-78-7143-01	0.166	1
TCGA-AO-A0JD-01	0.166	1
TCGA-BR-4255-01	0.166	1
TCGA-EE-A3J3-06	0.166	1
TCGA-BP-5175-01	0.165	1
TCGA-2J-AABF-01	0.165	1
TCGA-C8-A12O-01	0.165	1
TCGA-BH-A1F0-01	0.165	1
TCGA-VR-A8EQ-01	0.165	1
TCGA-UY-A78M-01	0.164	1
TCGA-D3-A8GI-06	0.164	1
TCGA-2G-AAHT-01	0.164	1
TCGA-FI-A2D2-01	0.164	1
TCGA-CD-A48A-01	0.163	1
TCGA-33-6738-01	0.163	1
TCGA-06-0649-01	0.163	1
TCGA-AA-A01D-01	0.163	1
TCGA-N5-A4RF-01	0.162	1
TCGA-BH-A0AW-01	0.162	1
TCGA-BH-A0BZ-01	0.161	1
TCGA-GC-A3BM-01	0.161	1
TCGA-B6-A402-01	0.161	1
TCGA-2G-AAL7-01	0.161	1
TCGA-29-1710-01	0.161	1
TCGA-EA-A43B-01	0.16	1
TCGA-50-5931-01	0.16	1
TCGA-EK-A2PG-01	0.16	1
TCGA-95-7944-01	0.16	1
TCGA-BB-A5HU-01	0.159	1
TCGA-E9-A1NF-01	0.159	1
TCGA-C8-A12V-01	0.159	1
TCGA-US-A776-01	0.159	1
TCGA-CJ-6027-01	0.159	1
TCGA-93-A4JO-01	0.159	1
TCGA-29-1777-01	0.159	1
TCGA-FX-A3TO-01	0.158	1
TCGA-D3-A3C6-06	0.158	1
TCGA-XE-AAO4-01	0.158	1
TCGA-A8-A06U-01	0.158	1
TCGA-BR-8687-01	0.158	1
TCGA-B0-5115-01	0.158	1
TCGA-56-8504-01	0.157	1
TCGA-CN-A49A-01	0.156	1
TCGA-A8-A08S-01	0.156	1
TCGA-L9-A743-01	0.156	1
TCGA-XE-A8H1-01	0.156	1
TCGA-77-7337-01	0.155	1
TCGA-VT-A80G-01	0.155	1
TCGA-HU-A4H2-01	0.155	1
TCGA-LN-A49X-01	0.154	1
TCGA-98-A538-01	0.154	1
TCGA-B6-A0RU-01	0.154	1
TCGA-AX-A3G1-01	0.154	1
TCGA-AR-A24H-01	0.154	1
TCGA-3B-A9HL-01	0.154	1
TCGA-A8-A09M-01	0.154	1
TCGA-50-5045-01	0.154	1
TCGA-MI-A75I-01	0.154	1
TCGA-55-6712-01	0.154	1
TCGA-K1-A42W-01	0.153	1
TCGA-VQ-A91Q-01	0.153	1
TCGA-B5-A0JN-01	0.153	1
TCGA-A7-A0DA-01	0.152	1
TCGA-NK-A5CR-01	0.152	1
TCGA-69-8254-01	0.152	1
TCGA-GI-A2C9-01	0.152	1
TCGA-D7-A4YU-01	0.152	1
TCGA-CF-A8HY-01	0.151	1
TCGA-C8-A8HR-01	0.151	1
TCGA-RD-A8N6-01	0.151	1
TCGA-62-8394-01	0.151	1
TCGA-D8-A1XJ-01	0.151	1
TCGA-BR-8588-01	0.151	1
TCGA-AR-A0TW-01	0.151	1
TCGA-KR-A7K8-01	0.151	1
TCGA-ED-A4XI-01	0.151	1
TCGA-14-1794-01	0.151	1
TCGA-CR-7388-01	0.15	1
TCGA-D3-A2JL-06	0.15	1
TCGA-JY-A93E-01	0.15	1
TCGA-FP-7916-01	0.15	1
TCGA-85-8048-01	0.15	1
TCGA-AG-3611-01	0.15	1
TCGA-GV-A40E-01	0.149	1
TCGA-SY-A9G5-01	0.149	1
TCGA-C5-A1BI-01	0.149	1
TCGA-X6-A8C2-01	0.149	1
TCGA-02-0330-01	0.149	1
TCGA-FC-7961-01	0.148	1
TCGA-97-8176-01	0.148	1
TCGA-2G-AAG7-01	0.148	1
TCGA-DU-8162-01	0.148	1
TCGA-YL-A8HM-01	0.148	1
TCGA-D1-A16S-01	0.148	1
TCGA-68-A59I-01	0.147	1
TCGA-J2-A4AG-01	0.147	1
TCGA-4J-AA1J-01	0.147	1
TCGA-60-2725-01	0.147	1
TCGA-3X-AAVE-01	0.147	1
TCGA-95-8494-01	0.147	1
TCGA-XU-A932-01	0.147	1
TCGA-VQ-A8PZ-01	0.147	1
TCGA-M8-A5N4-01	0.146	1
TCGA-86-7953-01	0.146	1
TCGA-BQ-5885-01	0.146	1
TCGA-3U-A98I-01	0.146	1
TCGA-2Y-A9GX-01	0.146	1
TCGA-AC-A3W6-01	0.145	1
TCGA-64-1679-01	0.145	1
TCGA-CN-4739-01	0.145	1
TCGA-55-7576-01	0.145	1
TCGA-55-6969-01	0.145	1
TCGA-FR-A729-06	0.145	1
TCGA-22-4594-01	0.145	1
TCGA-12-1098-01	0.145	1
TCGA-D1-A1O0-01	0.145	1
TCGA-QK-A8Z7-01	0.144	1
TCGA-66-2737-01	0.144	1
TCGA-97-A4LX-01	0.144	1
TCGA-86-A456-01	0.144	1
TCGA-30-1855-01	0.144	1
TCGA-3G-AB0T-01	0.144	1
TCGA-L9-A7SV-01	0.144	1
TCGA-69-A59K-01	0.144	1
TCGA-61-1914-01	0.144	1
TCGA-LL-A7SZ-01	0.144	1
TCGA-91-6840-01	0.143	1
TCGA-WC-A884-01	0.143	1
TCGA-DD-AAE7-01	0.143	1
TCGA-ER-A199-06	0.143	1
TCGA-02-0052-01	0.143	1
TCGA-50-6597-01	0.142	1
TCGA-A2-A0YK-01	0.142	1
TCGA-ZF-A9R0-01	0.142	1
TCGA-EE-A181-06	0.142	1
TCGA-AR-A2LQ-01	0.141	1
TCGA-49-6744-01	0.141	1
TCGA-DS-A0VL-01	0.14	1
TCGA-LD-A7W5-01	0.14	1
TCGA-F4-6461-01	0.14	1
TCGA-FR-A7UA-06	0.14	1
TCGA-FZ-5923-01	0.14	1
TCGA-FJ-A3ZF-01	0.139	1
TCGA-22-1011-01	0.139	1
TCGA-DK-A3IU-01	0.139	1
TCGA-39-5022-01	0.139	1
TCGA-CZ-5452-01	0.139	1
TCGA-GN-A267-06	0.138	1
TCGA-55-A48X-01	0.138	1
TCGA-NJ-A55O-01	0.138	1
TCGA-ET-A3BT-01	0.138	1
TCGA-DK-AA77-01	0.137	1
TCGA-L5-A8NL-01	0.137	1
TCGA-MU-A51Y-01	0.137	1
TCGA-VQ-A91N-01	0.137	1
TCGA-EL-A4JX-01	0.137	1
TCGA-A2-A0T7-01	0.136	1
TCGA-RB-A7B8-01	0.135	1
TCGA-66-2734-01	0.135	1
TCGA-N6-A4V9-01	0.135	1
TCGA-49-4490-01	0.135	1
TCGA-13-0883-01	0.135	1
TCGA-86-A4P7-01	0.135	1
TCGA-63-A5MS-01	0.135	1
TCGA-VQ-A8E2-01	0.134	1
TCGA-04-1362-01	0.134	1
TCGA-74-6584-01	0.134	1
TCGA-15-1447-01	0.133	1
TCGA-AJ-A2QM-01	0.132	2
TCGA-2G-AAGK-01	0.132	1
TCGA-DK-AA6W-01	0.132	1
TCGA-A8-A08R-01	0.132	1
TCGA-AR-A0U1-01	0.132	1
TCGA-56-8622-01	0.131	1
TCGA-E5-A4TZ-01	0.131	1
TCGA-13-1492-01	0.131	1
TCGA-06-0645-01	0.131	1
TCGA-25-1627-01	0.131	1
TCGA-25-1323-01	0.131	1
TCGA-PL-A8LZ-01	0.13	1
TCGA-K1-A6RT-01	0.13	1
TCGA-AR-A252-01	0.13	1
TCGA-78-7162-01	0.13	1
TCGA-XR-A8TG-01	0.13	1
TCGA-04-1519-01	0.13	1
TCGA-CD-A487-01	0.13	1
TCGA-EA-A1QS-01	0.129	1
TCGA-44-A4SS-01	0.129	1
TCGA-23-1032-01	0.129	1
TCGA-97-7937-01	0.129	1
TCGA-4Z-AA80-01	0.129	1
TCGA-25-1635-01	0.129	1
TCGA-Z6-AAPN-01	0.128	1
TCGA-CR-7379-01	0.128	1
TCGA-BT-A42C-01	0.128	1
TCGA-GM-A2DH-01	0.128	1
TCGA-R5-A7ZR-01	0.128	1
TCGA-EE-A183-06	0.128	1
TCGA-37-4135-01	0.128	1
TCGA-D3-A8GD-06	0.128	1
TCGA-23-1123-01	0.128	1
TCGA-50-5066-01	0.128	1
TCGA-21-1082-01	0.127	1
TCGA-06-0192-01	0.127	1
TCGA-BH-A1FU-01	0.126	1
TCGA-55-6981-01	0.126	1
TCGA-E9-A22B-01	0.126	1
TCGA-HU-A4GU-01	0.126	1
TCGA-GM-A2DD-01	0.125	1
TCGA-AN-A0AL-01	0.125	1
TCGA-KP-A3VZ-01	0.125	1
TCGA-AA-3666-01	0.125	1
TCGA-85-A4QQ-01	0.124	1
TCGA-XF-AAMT-01	0.124	1
TCGA-GC-A3OO-01	0.124	1
TCGA-LD-A74U-01	0.124	1
TCGA-E9-A1RH-01	0.124	1
TCGA-24-1928-01	0.124	1
TCGA-ZM-AA05-01	0.124	1
TCGA-39-5040-01	0.124	1
TCGA-HU-8243-01	0.124	1
TCGA-RD-A8N1-01	0.124	1
TCGA-WN-A9G9-01	0.124	1
TCGA-A2-A25F-01	0.123	2
TCGA-LI-A9QH-01	0.123	1
TCGA-A2-A04P-01	0.123	1
TCGA-LN-A5U5-01	0.123	1
TCGA-GM-A2DF-01	0.123	1
TCGA-50-5072-01	0.123	1
TCGA-DX-A48R-01	0.123	1
TCGA-AX-A1CF-01	0.123	1
TCGA-CV-7263-01	0.122	1
TCGA-VQ-AA68-01	0.122	1
TCGA-53-7624-01	0.121	1
TCGA-E9-A1NE-01	0.121	1
TCGA-24-1548-01	0.121	1
TCGA-D5-6923-01	0.121	1
TCGA-55-A4DG-01	0.121	1
TCGA-DD-AADL-01	0.121	1
TCGA-DQ-7589-01	0.12	1
TCGA-CN-4742-01	0.12	1
TCGA-XF-AAN3-01	0.12	1
TCGA-BH-A0BP-01	0.12	1
TCGA-JL-A3YW-01	0.12	1
TCGA-D3-A3MR-06	0.12	1
TCGA-FR-A7U9-06	0.12	1
TCGA-72-4233-01	0.12	1
TCGA-ZF-A9RC-01	0.119	1
TCGA-49-AARO-01	0.119	1
TCGA-61-1901-01	0.119	1
TCGA-AX-A2H2-01	0.119	1
TCGA-ND-A4W6-01	0.118	1
TCGA-2G-AALW-01	0.118	1
TCGA-91-8499-01	0.118	1
TCGA-BP-4974-01	0.118	1
TCGA-24-2267-01	0.118	1
TCGA-IN-A6RP-01	0.118	1
TCGA-EW-A1OW-01	0.117	1
TCGA-68-8251-01	0.117	1
TCGA-ZF-A9RE-01	0.117	1
TCGA-AC-A6IV-01	0.117	1
TCGA-CJ-4873-01	0.117	1
TCGA-ZF-AA5H-01	0.117	1
TCGA-19-0962-01	0.117	1
TCGA-EO-A1Y8-01	0.117	1
TCGA-VS-A9UH-01	0.116	1
TCGA-FD-A5BZ-01	0.116	1
TCGA-GM-A5PV-01	0.116	1
TCGA-E2-A14N-01	0.116	1
TCGA-CW-6097-01	0.116	1
TCGA-D5-6898-01	0.116	1
TCGA-FD-A6TI-01	0.116	1
TCGA-13-0768-01	0.116	1
TCGA-24-1105-01	0.116	1
TCGA-AX-A1CR-01	0.116	1
TCGA-AJ-A3BI-01	0.115	1
TCGA-A2-A0CU-01	0.115	1
TCGA-C4-A0F0-01	0.114	1
TCGA-D3-A3BZ-06	0.114	1
TCGA-D8-A1JB-01	0.114	1
TCGA-25-2399-01	0.114	1
TCGA-HJ-7597-01	0.114	1
TCGA-06-0128-01	0.114	1
TCGA-66-2782-01	0.113	1
TCGA-GD-A76B-01	0.113	1
TCGA-77-8150-01	0.112	1
TCGA-IB-7645-01	0.112	1
TCGA-49-AAR4-01	0.112	1
TCGA-13-0900-01	0.112	1
TCGA-VQ-A8PX-01	0.112	1
TCGA-H7-7774-01	0.112	1
TCGA-EI-6884-01	0.112	1
TCGA-NC-A5HJ-01	0.112	1
TCGA-D3-A8GC-06	0.112	1
TCGA-50-5068-01	0.112	1
TCGA-14-0813-01	0.112	1
TCGA-HZ-7925-01	0.111	1
TCGA-A7-A6VW-01	0.111	1
TCGA-D5-6539-01	0.111	1
TCGA-HU-A4GC-01	0.111	1
TCGA-IG-A97H-01	0.11	1
TCGA-85-8070-01	0.11	1
TCGA-2G-AAGE-01	0.11	1
TCGA-02-0055-01	0.11	1
TCGA-DO-A2HM-01	0.11	1
TCGA-IB-7889-01	0.109	1
TCGA-QC-A7B5-01	0.109	1
TCGA-A2-A0CO-01	0.109	1
TCGA-B0-4696-01	0.109	1
TCGA-BR-4183-01	0.109	1
TCGA-AR-A0U0-01	0.108	1
TCGA-CV-7235-01	0.107	1
TCGA-55-6982-01	0.107	1
TCGA-06-0130-01	0.107	1
TCGA-CG-4444-01	0.107	1
TCGA-3N-A9WD-06	0.107	1
TCGA-25-1321-01	0.107	1
TCGA-37-4132-01	0.107	1
TCGA-DD-AADV-01	0.107	1
TCGA-77-A5GB-01	0.106	1
TCGA-P3-A6SW-01	0.106	1
TCGA-24-2254-01	0.106	1
TCGA-V5-A7RE-01	0.106	1
TCGA-RD-A7C1-01	0.106	1
TCGA-55-6979-01	0.106	1
TCGA-09-1667-01	0.106	1
TCGA-DU-7304-01	0.106	1
TCGA-85-6798-01	0.105	1
TCGA-26-5132-01	0.105	1
TCGA-BR-4366-01	0.105	1
TCGA-HZ-8637-01	0.105	1
TCGA-44-6777-01	0.105	1
TCGA-DK-AA6P-01	0.105	1
TCGA-C8-A1HG-01	0.105	1
TCGA-B0-4819-01	0.105	1
TCGA-29-1771-01	0.104	2
TCGA-DD-A114-01	0.104	1
TCGA-24-1418-01	0.104	1
TCGA-05-5420-01	0.104	1
TCGA-32-2634-01	0.103	1
TCGA-L5-A8NV-01	0.103	1
TCGA-55-8089-01	0.103	1
TCGA-LN-A9FP-01	0.102	1
TCGA-FD-A3B7-01	0.102	1
TCGA-VS-A8QM-01	0.102	1
TCGA-3B-A9I3-01	0.101	1
TCGA-N5-A59F-01	0.101	1
TCGA-3U-A98D-01	0.101	1
TCGA-E2-A1L7-01	0.101	1
TCGA-S3-AA10-01	0.101	1
TCGA-75-6207-01	0.101	1
TCGA-IN-A6RI-01	0.101	1
TCGA-LL-A5YO-01	0.101	1
TCGA-IB-AAUM-01	0.101	1
TCGA-HT-A5R7-01	0.101	1
TCGA-28-1752-01	0.101	1
TCGA-D8-A1XA-01	0.1	0
TCGA-XF-AAMZ-01	0.1	0
TCGA-29-1693-01	0.1	0
TCGA-ZJ-AAXB-01	0.099	0
TCGA-LP-A7HU-01	0.099	0
TCGA-K4-A6FZ-01	0.099	0
TCGA-A3-3347-01	0.099	0
TCGA-MP-A4SY-01	0.099	0
TCGA-ZF-A9RM-01	0.099	0
TCGA-MP-A4TA-01	0.099	0
TCGA-CG-5719-01	0.099	0
TCGA-BR-8296-01	0.099	0
TCGA-BG-A2AE-01	0.099	0
TCGA-EA-A556-01	0.098	0
TCGA-LB-A7SX-01	0.098	0
TCGA-A2-A1G1-01	0.098	0
TCGA-29-1769-01	0.098	0
TCGA-ZF-AA54-01	0.098	0
TCGA-ZG-A9M4-01	0.098	0
TCGA-AX-A2HK-01	0.098	0
TCGA-HM-A3JJ-01	0.097	0
TCGA-LN-A7HY-01	0.097	0
TCGA-63-A5MW-01	0.097	0
TCGA-AB-2938-03	0.097	0
TCGA-QQ-A8VH-01	0.096	0
TCGA-B6-A0RQ-01	0.096	0
TCGA-S9-A6UA-01	0.096	0
TCGA-44-6145-01	0.096	0
TCGA-62-A46Y-01	0.096	0
TCGA-CG-4476-01	0.096	0
TCGA-BJ-A0ZB-01	0.096	0
TCGA-06-0176-01	0.096	0
TCGA-AR-A1AH-01	0.095	0
TCGA-B0-4712-01	0.095	0
TCGA-CM-5863-01	0.095	0
TCGA-23-1109-01	0.095	0
TCGA-AO-A0JC-01	0.095	0
TCGA-AX-A06B-01	0.095	0
TCGA-QQ-A5V9-01	0.094	0
TCGA-24-0979-01	0.094	0
TCGA-BH-A1F2-01	0.093	0
TCGA-22-5482-01	0.093	0
TCGA-D6-6823-01	0.093	0
TCGA-13-1495-01	0.093	0
TCGA-02-0048-01	0.093	0
TCGA-AA-3538-01	0.093	0
TCGA-EY-A547-01	0.092	0
TCGA-CN-A499-01	0.092	0
TCGA-B6-A0IB-01	0.092	0
TCGA-85-8350-01	0.092	0
TCGA-CV-A6JO-01	0.092	0
TCGA-58-A46J-01	0.092	0
TCGA-DK-A1AA-01	0.092	0
TCGA-06-0138-01	0.092	0
TCGA-29-1688-01	0.092	0
TCGA-D1-A16N-01	0.092	0
TCGA-BS-A0V7-01	0.091	0
TCGA-AR-A2LL-01	0.091	0
TCGA-XF-AAML-01	0.091	0
TCGA-DD-AACD-01	0.091	0
TCGA-E9-A229-01	0.09	0
TCGA-59-2363-01	0.09	0
TCGA-55-8616-01	0.09	0
TCGA-19-A60I-01	0.09	0
TCGA-AA-3972-01	0.09	0
TCGA-CV-7425-01	0.089	0
TCGA-IB-7888-01	0.089	0
TCGA-C5-A3HE-01	0.089	0
TCGA-55-8505-01	0.089	0
TCGA-25-1632-01	0.089	0
TCGA-CG-5732-01	0.089	0
TCGA-G3-AAV4-01	0.089	0
TCGA-FD-A3B5-01	0.088	0
TCGA-34-5236-01	0.088	0
TCGA-77-8139-01	0.088	0
TCGA-DK-A6AV-01	0.088	0
TCGA-06-0184-01	0.088	0
TCGA-D7-A6EX-01	0.088	0
TCGA-2G-AAFL-01	0.088	0
TCGA-DA-A1HW-06	0.088	0
TCGA-DD-AACE-01	0.088	0
TCGA-44-6774-01	0.087	0
TCGA-AC-A62Y-01	0.087	0
TCGA-E2-A573-01	0.087	0
TCGA-ZQ-A9CR-01	0.087	0
TCGA-AR-A1AX-01	0.087	0
TCGA-AO-A0J4-01	0.087	0
TCGA-D8-A145-01	0.087	0
TCGA-J9-A52B-01	0.087	0
TCGA-XU-AAXW-01	0.087	0
TCGA-AA-A00O-01	0.087	0
TCGA-VQ-A8PS-01	0.087	0
TCGA-FG-A6J3-01	0.086	0
TCGA-LN-A49S-01	0.086	0
TCGA-86-8073-01	0.086	0
TCGA-CC-A3M9-01	0.086	0
TCGA-AC-A2QH-01	0.086	0
TCGA-VF-A8AB-01	0.086	0
TCGA-32-2615-01	0.086	0
TCGA-HT-7474-01	0.086	0
TCGA-13-0891-01	0.086	0
TCGA-JY-A6F8-01	0.086	0
TCGA-CJ-4900-01	0.086	0
TCGA-EE-A2A2-06	0.086	0
TCGA-02-0104-01	0.086	0
TCGA-06-0159-01	0.086	0
TCGA-60-2724-01	0.085	0
TCGA-FD-A3NA-01	0.085	0
TCGA-CJ-6033-01	0.085	0
TCGA-FD-A62O-01	0.085	0
TCGA-ZF-A9R4-01	0.085	0
TCGA-CJ-4637-01	0.085	0
TCGA-XU-A92W-01	0.085	0
TCGA-G3-A3CH-01	0.085	0
TCGA-AG-3600-01	0.085	0
TCGA-14-0862-01	0.084	0
TCGA-BG-A0M8-01	0.084	0
TCGA-56-7580-01	0.083	0
TCGA-3C-AALJ-01	0.083	0
TCGA-EE-A2A5-06	0.083	0
TCGA-23-1122-01	0.083	0
TCGA-69-7978-01	0.083	0
TCGA-EL-A3MX-01	0.082	0
TCGA-BR-8297-01	0.082	0
TCGA-55-6968-01	0.082	0
TCGA-3X-AAVC-01	0.082	0
TCGA-AP-A05H-01	0.082	0
TCGA-D1-A169-01	0.082	0
TCGA-UC-A7PD-01	0.081	0
TCGA-VS-A94Z-01	0.081	0
TCGA-ZH-A8Y4-01	0.081	0
TCGA-EY-A210-01	0.081	0
TCGA-EW-A1P7-01	0.081	0
TCGA-29-1697-01	0.081	0
TCGA-E9-A3QA-01	0.081	0
TCGA-13-1489-01	0.081	0
TCGA-2Y-A9GS-01	0.081	0
TCGA-02-0059-01	0.081	0
TCGA-C8-A1HF-01	0.081	0
TCGA-EW-A1PG-01	0.08	0
TCGA-5N-A9KI-01	0.08	0
TCGA-08-0353-01	0.08	0
TCGA-60-2720-01	0.079	0
TCGA-QQ-A5VD-01	0.079	0
TCGA-E2-A1B0-01	0.079	0
TCGA-63-7021-01	0.079	0
TCGA-66-2769-01	0.079	0
TCGA-13-0887-01	0.079	0
TCGA-28-5207-01	0.079	0
TCGA-AA-3511-01	0.079	0
TCGA-BR-6565-01	0.079	0
TCGA-09-1669-01	0.079	0
TCGA-AA-3854-01	0.079	0
TCGA-VS-A8EH-01	0.078	0
TCGA-E7-A541-01	0.078	0
TCGA-KQ-A41N-01	0.078	0
TCGA-F7-7848-01	0.078	0
TCGA-B6-A0RO-01	0.078	0
TCGA-C8-A12K-01	0.078	0
TCGA-63-A5MV-01	0.078	0
TCGA-FS-A1ZW-06	0.078	0
TCGA-16-0850-01	0.078	0
TCGA-BH-A0B7-01	0.077	0
TCGA-AC-A3YI-01	0.077	0
TCGA-AR-A2LH-01	0.077	0
TCGA-A5-A2K4-01	0.077	0
TCGA-CV-A45T-01	0.077	0
TCGA-E9-A248-01	0.077	0
TCGA-CV-5970-01	0.076	0
TCGA-DX-AB2T-01	0.076	0
TCGA-FB-AAQ1-01	0.076	0
TCGA-WR-A838-01	0.076	0
TCGA-LL-A8F5-01	0.076	0
TCGA-13-0801-01	0.076	0
TCGA-05-5423-01	0.076	0
TCGA-14-1453-01	0.076	0
TCGA-98-7454-01	0.075	0
TCGA-ZG-A9L0-01	0.075	0
TCGA-ER-A19W-06	0.075	0
TCGA-VQ-A8PC-01	0.075	0
TCGA-23-1118-01	0.075	0
TCGA-BT-A3PH-01	0.075	0
TCGA-CG-4440-01	0.075	0
TCGA-DX-A3LS-01	0.075	0
TCGA-A2-A3XT-01	0.075	0
TCGA-04-1365-01	0.075	0
TCGA-06-0166-01	0.075	0
TCGA-12-1096-01	0.075	0
TCGA-13-0921-01	0.075	0
TCGA-57-1992-01	0.075	0
TCGA-CN-4725-01	0.074	0
TCGA-DX-A6YR-01	0.074	0
TCGA-DV-5574-01	0.074	0
TCGA-EA-A3QD-01	0.074	0
TCGA-61-1913-01	0.074	0
TCGA-WS-AB45-01	0.073	0
TCGA-XM-A8RC-01	0.073	0
TCGA-QQ-A5VB-01	0.073	0
TCGA-24-2297-01	0.073	0
TCGA-HU-8610-01	0.073	0
TCGA-42-2589-01	0.073	0
TCGA-WA-A7H4-01	0.072	0
TCGA-92-7340-01	0.072	0
TCGA-18-4083-01	0.072	0
TCGA-PC-A5DO-01	0.072	0
TCGA-NJ-A55A-01	0.072	0
TCGA-QG-A5YX-01	0.072	0
TCGA-Z2-A8RT-06	0.072	0
TCGA-YL-A8SQ-01	0.072	0
TCGA-XM-AAZ1-01	0.072	0
TCGA-02-0026-01	0.072	0
TCGA-04-1367-01	0.072	0
TCGA-06-0173-01	0.072	0
TCGA-13-0889-01	0.072	0
TCGA-P3-A5QA-01	0.071	0
TCGA-C5-A1BQ-01	0.071	0
TCGA-E9-A5FL-01	0.071	0
TCGA-OL-A5RY-01	0.071	0
TCGA-E9-A1NA-01	0.071	0
TCGA-NA-A4R1-01	0.071	0
TCGA-BR-8683-01	0.071	0
TCGA-4V-A9QJ-01	0.071	0
TCGA-12-0821-01	0.071	0
TCGA-A8-A0A7-01	0.071	0
TCGA-A8-A08F-01	0.071	0
TCGA-DD-AAE6-01	0.071	0
TCGA-A6-3807-01	0.071	0
TCGA-N5-A4RT-01	0.07	0
TCGA-IM-A3U2-01	0.07	0
TCGA-W5-AA2I-01	0.07	0
TCGA-BP-5201-01	0.07	0
TCGA-VF-A8AA-01	0.07	0
TCGA-E2-A1LL-01	0.069	0
TCGA-Q1-A73O-01	0.069	0
TCGA-HB-A5W3-01	0.069	0
TCGA-JV-A5VE-01	0.069	0
TCGA-L5-A8NK-01	0.069	0
TCGA-AX-A3FV-01	0.069	0
TCGA-XU-AAXX-01	0.069	0
TCGA-BT-A20O-01	0.069	0
TCGA-50-5049-01	0.069	0
TCGA-FV-A2QQ-01	0.069	0
TCGA-13-0793-01	0.069	0
TCGA-FD-A5C1-01	0.068	0
TCGA-HQ-A5NE-01	0.068	0
TCGA-D7-8578-01	0.068	0
TCGA-YA-A8S7-01	0.068	0
TCGA-S9-A7J0-01	0.068	0
TCGA-DD-AACP-01	0.068	0
TCGA-A8-A081-01	0.068	0
TCGA-RC-A7SF-01	0.068	0
TCGA-85-7697-01	0.067	0
TCGA-61-2016-01	0.067	0
TCGA-38-4626-01	0.067	0
TCGA-12-1093-01	0.067	0
TCGA-FZ-5921-01	0.067	0
TCGA-3A-A9IH-01	0.066	0
TCGA-IG-A3YC-01	0.066	0
TCGA-A2-A0CL-01	0.066	0
TCGA-13-1405-01	0.066	0
TCGA-AZ-4323-01	0.066	0
TCGA-ET-A25L-01	0.066	0
TCGA-24-1930-01	0.066	0
TCGA-BC-A10X-01	0.066	0
TCGA-AA-3556-01	0.066	0
TCGA-EO-A2CH-01	0.066	0
TCGA-EY-A1G8-01	0.066	0
TCGA-MN-A4N4-01	0.065	0
TCGA-C5-A2LX-01	0.065	0
TCGA-BA-6869-01	0.065	0
TCGA-AA-3697-01	0.065	0
TCGA-D8-A1JG-01	0.065	0
TCGA-BH-A0H5-01	0.065	0
TCGA-06-6694-01	0.065	0
TCGA-CF-A1HS-01	0.064	0
TCGA-IF-A3RQ-01	0.064	0
TCGA-BR-A4J7-01	0.064	0
TCGA-CV-6953-01	0.064	0
TCGA-VS-A9UC-01	0.064	0
TCGA-24-2293-01	0.064	0
TCGA-EE-A3JD-06	0.064	0
TCGA-13-0758-01	0.064	0
TCGA-72-4232-01	0.064	0
TCGA-B5-A0K8-01	0.064	0
TCGA-TN-A7HJ-01	0.063	0
TCGA-BR-6563-01	0.063	0
TCGA-61-1995-01	0.063	0
TCGA-DD-A4NS-01	0.063	0
TCGA-AA-3841-01	0.063	0
TCGA-BH-A0W7-01	0.062	0
TCGA-86-8673-01	0.062	0
TCGA-24-1567-01	0.062	0
TCGA-XF-AAN0-01	0.062	0
TCGA-2G-AAGC-01	0.062	0
TCGA-A2-A4RY-01	0.062	0
TCGA-50-5933-01	0.062	0
TCGA-FS-A1ZM-06	0.062	0
TCGA-DA-A1IB-06	0.062	0
TCGA-31-1944-01	0.062	0
TCGA-RQ-AAAT-01	0.062	0
TCGA-AJ-A2QK-01	0.062	0
TCGA-BG-A3PP-01	0.061	0
TCGA-CV-6956-01	0.061	0
TCGA-BA-A4II-01	0.061	0
TCGA-N8-A4PM-01	0.061	0
TCGA-CM-6677-01	0.061	0
TCGA-EE-A3JI-06	0.061	0
TCGA-20-1682-01	0.061	0
TCGA-24-1603-01	0.061	0
TCGA-D3-A8GN-06	0.061	0
TCGA-25-1322-01	0.061	0
TCGA-W3-AA1V-06	0.061	0
TCGA-02-0033-01	0.061	0
TCGA-09-1675-01	0.061	0
TCGA-E9-A1RI-01	0.06	0
TCGA-BA-4078-01	0.06	0
TCGA-EO-A1Y7-01	0.06	0
TCGA-IQ-A6SG-01	0.06	0
TCGA-85-8582-01	0.06	0
TCGA-E2-A576-01	0.06	0
TCGA-66-2788-01	0.06	0
TCGA-05-4382-01	0.06	0
TCGA-IG-A625-01	0.06	0
TCGA-38-4627-01	0.06	0
TCGA-KK-A6E1-01	0.06	0
TCGA-L5-A4OJ-01	0.06	0
TCGA-L5-A4OS-01	0.06	0
TCGA-13-0923-01	0.06	0
TCGA-13-0792-01	0.06	0
TCGA-AX-A1C9-01	0.06	0
TCGA-IR-A3LK-01	0.059	0
TCGA-FS-A1ZB-06	0.059	0
TCGA-AN-A0AR-01	0.059	0
TCGA-BR-8690-01	0.059	0
TCGA-62-A46R-01	0.059	0
TCGA-EM-A3SU-01	0.059	0
TCGA-EE-A2GC-06	0.059	0
TCGA-06-1800-01	0.059	0
TCGA-13-1491-01	0.059	0
TCGA-14-0865-01	0.059	0
TCGA-BH-A0E2-01	0.058	0
TCGA-22-4605-01	0.058	0
TCGA-UT-A88G-01	0.058	0
TCGA-LL-A440-01	0.058	0
TCGA-ZJ-AAX4-01	0.058	0
TCGA-FD-A5BS-01	0.058	0
TCGA-AR-A0U3-01	0.058	0
TCGA-L9-A8F4-01	0.058	0
TCGA-09-1673-01	0.058	0
TCGA-DX-A48P-01	0.057	0
TCGA-NK-A5CX-01	0.057	0
TCGA-A2-A4S3-01	0.057	0
TCGA-SB-A6J6-01	0.057	0
TCGA-06-0213-01	0.057	0
TCGA-N5-A4RJ-01	0.056	0
TCGA-Q1-A5R1-01	0.056	0
TCGA-A8-A07L-01	0.056	0
TCGA-DC-6158-01	0.056	0
TCGA-55-8510-01	0.056	0
TCGA-BP-4343-01	0.056	0
TCGA-2H-A9GL-01	0.056	0
TCGA-CJ-4641-01	0.056	0
TCGA-FW-A5DY-06	0.056	0
TCGA-EM-A22I-01	0.056	0
TCGA-2H-A9GR-01	0.056	0
TCGA-D9-A149-06	0.056	0
TCGA-72-4240-01	0.056	0
TCGA-E2-A108-01	0.056	0
TCGA-N8-A4PI-01	0.055	0
TCGA-43-8116-01	0.055	0
TCGA-CC-A7II-01	0.055	0
TCGA-44-3919-01	0.055	0
TCGA-VS-A9V0-01	0.055	0
TCGA-UY-A9PF-01	0.055	0
TCGA-EW-A1OZ-01	0.055	0
TCGA-26-5133-01	0.055	0
TCGA-J2-A4AE-01	0.055	0
TCGA-B6-A3ZX-01	0.055	0
TCGA-04-1348-01	0.055	0
TCGA-BP-4354-01	0.055	0
TCGA-PQ-A6FN-01	0.054	0
TCGA-CN-5367-01	0.054	0
TCGA-22-5478-01	0.054	0
TCGA-Q1-A73R-01	0.054	0
TCGA-ZG-A9MC-01	0.054	0
TCGA-AR-A256-01	0.054	0
TCGA-99-8028-01	0.054	0
TCGA-CI-6619-01	0.054	0
TCGA-10-0937-01	0.054	0
TCGA-13-0897-01	0.054	0
TCGA-VQ-A91S-01	0.054	0
TCGA-BR-4367-01	0.054	0
TCGA-ER-A19E-06	0.054	0
TCGA-D3-A1Q3-06	0.054	0
TCGA-X7-A8M6-01	0.054	0
TCGA-HG-A9SC-01	0.054	0
TCGA-O2-A52V-01	0.053	0
TCGA-A2-A25A-01	0.053	0
TCGA-XD-AAUH-01	0.053	0
TCGA-EW-A6S9-01	0.053	0
TCGA-DD-A4NQ-01	0.053	0
TCGA-FP-8099-01	0.053	0
TCGA-SW-A7EB-01	0.053	0
TCGA-CR-7404-01	0.052	0
TCGA-VR-A8Q7-01	0.052	0
TCGA-60-2703-01	0.052	0
TCGA-VT-AB3D-01	0.052	0
TCGA-MZ-A7D7-01	0.052	0
TCGA-83-5908-01	0.052	0
TCGA-DI-A2QT-01	0.052	0
TCGA-W5-AA2T-01	0.052	0
TCGA-AX-A1C7-01	0.052	0
TCGA-BR-8060-01	0.052	0
TCGA-EM-A3SZ-01	0.052	0
TCGA-BK-A26L-01	0.052	0
TCGA-24-1103-01	0.052	0
TCGA-WY-A85E-01	0.052	0
TCGA-4V-A9QI-01	0.052	0
TCGA-AA-3692-01	0.052	0
TCGA-AA-3947-01	0.052	0
TCGA-DQ-7592-01	0.051	0
TCGA-70-6722-01	0.051	0
TCGA-DX-A6YT-01	0.051	0
TCGA-CQ-A4C9-01	0.051	0
TCGA-91-6829-01	0.051	0
TCGA-2J-AAB4-01	0.051	0
TCGA-BR-8367-01	0.051	0
TCGA-2G-AAFJ-01	0.051	0
TCGA-W4-A7U3-01	0.051	0
TCGA-US-A77G-01	0.051	0
TCGA-BH-A1FD-01	0.051	0
TCGA-29-1762-01	0.051	0
TCGA-13-1507-01	0.051	0
TCGA-ZS-A9CE-01	0.051	0
TCGA-23-1110-01	0.051	0
TCGA-ED-A7PZ-01	0.051	0
TCGA-09-2050-01	0.051	0
TCGA-AG-3898-01	0.051	0
TCGA-CG-4300-01	0.051	0
TCGA-OR-A5K2-01	0.051	0
TCGA-DX-A3LW-01	0.05	0
TCGA-BI-A20A-01	0.05	0
TCGA-E9-A2JT-01	0.05	0
TCGA-DJ-A1QE-01	0.05	0
TCGA-B8-5553-01	0.05	0
TCGA-BR-8486-01	0.05	0
TCGA-DD-AAEE-01	0.05	0
TCGA-AA-3530-01	0.05	0
TCGA-GU-A764-01	0.049	0
TCGA-EO-A3KW-01	0.049	0
TCGA-62-A471-01	0.049	0
TCGA-E2-A15H-01	0.049	0
TCGA-22-1002-01	0.049	0
TCGA-CN-4740-01	0.049	0
TCGA-13-1404-01	0.049	0
TCGA-D7-6520-01	0.049	0
TCGA-EE-A3J8-06	0.049	0
TCGA-2G-AAHN-01	0.049	0
TCGA-2G-AAHG-01	0.049	0
TCGA-XF-A9ST-01	0.049	0
TCGA-A5-A0GJ-01	0.049	0
TCGA-AF-3400-01	0.049	0
TCGA-CN-6011-01	0.048	0
TCGA-2G-AALN-01	0.048	0
TCGA-43-6770-01	0.048	0
TCGA-H6-A45N-01	0.048	0
TCGA-29-1768-01	0.048	0
TCGA-13-0886-01	0.048	0
TCGA-G9-7521-01	0.048	0
TCGA-13-0766-01	0.048	0
TCGA-XU-AAXY-01	0.048	0
TCGA-HT-7902-01	0.048	0
TCGA-06-0875-01	0.048	0
TCGA-AW-A1PO-01	0.048	0
TCGA-D1-A17K-01	0.048	0
TCGA-D8-A1XT-01	0.047	0
TCGA-IQ-A61I-01	0.047	0
TCGA-SN-A84W-01	0.047	0
TCGA-02-0047-01	0.047	0
TCGA-62-8397-01	0.047	0
TCGA-24-1546-01	0.047	0
TCGA-DB-5277-01	0.047	0
TCGA-61-1740-01	0.047	0
TCGA-24-1419-01	0.047	0
TCGA-04-1335-01	0.047	0
TCGA-06-6693-01	0.047	0
TCGA-AG-4015-01	0.047	0
TCGA-ZF-AA4N-01	0.046	0
TCGA-56-7731-01	0.046	0
TCGA-85-7698-01	0.046	0
TCGA-BA-5555-01	0.046	0
TCGA-C5-A7XC-01	0.046	0
TCGA-85-8580-01	0.046	0
TCGA-J4-A67L-01	0.046	0
TCGA-2G-AAM2-01	0.046	0
TCGA-FS-A1Z4-06	0.046	0
TCGA-YU-AA4L-01	0.046	0
TCGA-2A-A8VT-01	0.046	0
TCGA-VP-A876-01	0.046	0
TCGA-HU-A4H6-01	0.046	0
TCGA-BR-7723-01	0.046	0
TCGA-44-2661-01	0.046	0
TCGA-59-2349-01	0.046	0
TCGA-D1-A15V-01	0.046	0
TCGA-D1-A179-01	0.046	0
TCGA-BA-6868-01	0.045	0
TCGA-EX-A1H5-01	0.045	0
TCGA-G2-A3IB-01	0.045	0
TCGA-AQ-A54N-01	0.045	0
TCGA-DX-A3LY-01	0.045	0
TCGA-66-2780-01	0.045	0
TCGA-E2-A1IO-01	0.045	0
TCGA-C5-A1BN-01	0.045	0
TCGA-AR-A1AO-01	0.045	0
TCGA-HU-A4GH-01	0.045	0
TCGA-06-0686-01	0.045	0
TCGA-EJ-A8FP-01	0.045	0
[truncated: 10,841 more rows]

## Sheet: PTGFRN_Transcripts
Supplementary Table 4: PTGFRN transcripts in Pan-cancer
sample	ENST00000393203.2	ENST00000496699.1	ENST00000497385.1	ENST00000483099.5	ENST00000475035.5	ENST00000470492.5	ENST00000414487.6	ENST00000469451.1	ENST00000367208.1
TCGA-LN-A49W-01	8.596	3.489	-9.966	0.7321	4.732	-0.394	4.918	0.547	6.194
TCGA-LN-A5U6-01	8.354	1.642	-9.966	-1.685	4.877	-0.0277	5.428	-0.7834	6.067
TCGA-HD-8635-01	8.226	2.177	-9.966	-0.7346	5.871	4.454	4.399	0.9789	1.844
TCGA-Q9-A6FU-01	7.925	1.27	-9.966	-0.1187	5.006	-0.4719	5.378	1.05	5.721
TCGA-BB-7872-01	7.854	0.9115	7.801	0.0014	5.952	5.642	4.297	-0.0877	-0.5125
TCGA-DX-A23R-01	7.827	0.7916	-9.966	-0.013	6.695	5.535	5.051	1.86	1.541
TCGA-QK-A8Z9-01	7.808	0.3231	7.147	1.078	5.554	4.357	5.326	0.9642	4.765
TCGA-P3-A6SX-01	7.728	0.8488	5.879	0.2277	6.297	5.925	5.58	0.3346	-0.0277
TCGA-56-8626-01	7.716	3.438	-9.966	1.86	5.543	5.502	4.051	-9.966	1.628
TCGA-77-A5G1-01	7.702	3.305	-9.966	-0.4131	5.679	4.906	4.098	0.2029	-9.966
TCGA-CQ-7069-01	7.671	1.848	-9.966	0.2154	5.566	4.209	3.828	-9.966	-9.966
TCGA-CV-6950-01	7.664	0.8408	3.069	-0.7588	5.601	4.852	4.255	0.2029	0.2029
TCGA-IQ-A61O-01	7.663	1.029	9.037	-0.4325	5.877	6.143	4.827	1.506	1.05
TCGA-F7-8298-01	7.652	1.576	1.74	0.5859	6.443	5.872	5.645	2.154	2.844
TCGA-BA-6868-01	7.637	1.896	4.663	0.1257	5.886	5.626	4.734	-1.831	-0.7346
TCGA-CV-7415-01	7.623	1.311	6.986	-2.932	5.319	5.261	4.047	-9.966	1.688
TCGA-CV-7423-01	7.563	1.614	-9.966	-1.781	5.592	5.082	4.155	-1.392	-9.966
TCGA-36-1581-01	7.562	2.359	-9.966	1.688	6.374	4.324	6.08	2.193	5.869
TCGA-77-8008-01	7.557	2.138	4.318	0.6145	5.222	4.843	4.401	0.2642	4.393
TCGA-LN-A49O-01	7.546	1.791	-9.966	-0.8084	4.067	-1.884	4.714	0.8164	5.758
TCGA-VR-AA7D-01	7.54	2.211	-9.966	0.1776	5.271	0.9343	5.621	2.379	6.063
TCGA-EA-A1QS-01	7.539	0.5763	7.537	0.679	6.211	5.329	4.905	0.7664	1.665
TCGA-LN-A49N-01	7.53	2.58	-9.966	0.3907	3.768	-9.966	4.28	-2.727	5.055
TCGA-CV-5970-01	7.507	0.3573	-9.966	-1.318	5.063	4.498	3.569	-0.0725	-9.966
TCGA-77-7337-01	7.487	1.439	-9.966	-0.2671	6.524	6.475	4.744	1.434	-0.8339
TCGA-FX-A3NJ-01	7.447	-0.6416	4.297	-0.2328	5.753	3.5	4.316	2.334	-9.966
TCGA-DQ-5631-01	7.44	0.7493	-9.966	0.3346	6.218	5.338	4.85	0.4865	-1.248
TCGA-DX-A1KY-01	7.418	0.7999	0.8246	0.2154	5.325	4.468	3.832	1.753	-9.966
TCGA-CV-7236-01	7.397	0.5271	-9.966	-1.318	5.866	4.561	4.334	-0.5973	2.431
TCGA-63-A5ML-01	7.395	1.252	6.463	0.9716	6.905	6.129	5.694	1.486	3.23
TCGA-P3-A5QA-01	7.339	1.233	6.773	1.233	6.374	5.942	4.984	1.385	-9.966
TCGA-98-8020-01	7.333	1.362	-9.966	-0.4921	5.625	5.653	4.512	1.043	0.03
TCGA-DQ-7592-01	7.305	1.183	-9.966	-0.4131	5.866	5.663	4.626	-0.2159	-9.966
TCGA-HD-7753-01	7.303	0.7493	3.366	0.1257	5.841	5.497	4.62	0.4552	1.328
TCGA-CR-7380-01	7.302	0.8568	-9.966	-2.635	5.633	5.011	4.36	-0.9132	-9.966
TCGA-GC-A3RC-01	7.293	2.022	5.658	-1.51	5.272	5.368	4.172	-9.966	-9.966
TCGA-DX-A3U9-01	7.286	0.9493	5.357	0.434	5.989	5.497	4.498	1.288	1.945
TCGA-P3-A6T8-01	7.284	0.2762	5.863	1.085	5.616	5.262	4.839	1.288	0.7146
TCGA-CR-7382-01	7.282	0.6517	-9.966	-0.6416	5.636	5.723	4.76	1.357	-9.966
TCGA-CR-6474-01	7.273	1.844	-9.966	-1.149	5.452	4.856	4.13	-0.7346	-9.966
TCGA-CV-7434-01	7.273	-0.5756	-9.966	-1.056	5.32	4.841	4.188	0.605	-0.6873
TCGA-FX-A2QS-01	7.258	-0.1187	-9.966	-0.5332	5.461	4.714	4.616	2.406	-9.966
TCGA-CR-6477-01	7.246	-0.3383	-9.966	-1.431	5.484	5.214	4.323	-1.831	-9.966
TCGA-60-2710-01	7.236	0.5666	-9.966	0.1124	6.172	5.406	4.628	0.6239	-0.8599
TCGA-77-8146-01	7.234	1.245	6.619	0.044	6.094	6.24	5.04	1.151	-9.966
TCGA-FD-A5BU-01	7.223	1.19	6.172	-1.026	6.104	6.217	4.953	1.537	-0.013
TCGA-CR-6488-01	7.2	0.5763	-9.966	-0.3752	5.118	4.678	4.023	-1.392	-9.966
TCGA-77-8138-01	7.193	1.506	4.775	-0.7834	6.039	6.093	4.68	-9.966	-0.013
TCGA-Z4-A8JB-01	7.189	-9.966	6.735	-0.9406	4.578	4.891	4.056	-9.966	2.138
TCGA-CR-7373-01	7.186	-0.1345	-9.966	-0.2159	5.853	5.728	4.901	1.556	0.8568
TCGA-77-A5G6-01	7.185	0.9642	6.26	0.8805	6.343	6.366	5.312	0.9343	2.632
TCGA-QK-A64Z-01	7.17	0.605	5.889	0.9935	5.839	6.045	4.967	-1.685	2.173
TCGA-VR-AA7B-01	7.169	2.414	-9.966	-0.2159	4.852	1.036	5.187	0.9115	5.633
TCGA-CV-7090-01	7.15	1.417	-9.966	-1.732	5.509	4.468	4.345	-9.966	-9.966
TCGA-56-A62T-01	7.145	2.822	-9.966	0.8961	5.893	5.481	5.487	1.396	-0.1665
TCGA-58-A46K-01	7.138	2.008	5.611	1.512	6.851	5.403	4.867	1.903	3.088
TCGA-CR-7386-01	7.137	-0.3022	-9.966	-2.315	5.534	4.3	4.046	-0.1031	-9.966
TCGA-D6-6825-01	7.129	1.766	-9.966	-0.4719	5.333	5.465	4.727	-1.248	0.6425
TCGA-D6-A4Z9-01	7.094	1.145	-9.966	0.3115	5.66	5.412	4.532	-1.026	1.39
TCGA-A8-A0A6-01	7.071	1.816	7.866	0.8726	6.964	6.38	5.608	-9.966	3.072
TCGA-CN-4742-01	7.058	0.7664	-9.966	-1.392	5.282	4.71	4.057	0.3685	-9.966
TCGA-CQ-6224-01	7.057	-0.1665	1.892	-1.283	5.683	5.695	4.6	1.444	-0.7346
TCGA-PC-A5DL-01	7.053	-0.7588	6.516	-0.4521	5.845	4.702	4.044	0.7664	-9.966
TCGA-HD-7831-01	7.052	1.164	4.206	-0.5756	5.378	4.596	4.314	0.2154	-9.966
TCGA-56-8082-01	7.049	1.836	-9.966	1.071	6.215	5.506	4.879	1.705	-9.966
TCGA-IG-A97H-01	7.049	1.506	6.89	0.1776	5.181	0.4552	5.507	0.9568	6.864
TCGA-BA-6873-01	7.039	0.8327	-9.966	-0.1828	5.923	5.706	4.57	0.4657	-9.966
TCGA-C5-A8ZZ-01	7.037	0.7146	4.309	1.688	6.172	5.725	5.784	1.506	2.108
TCGA-LN-A4A5-01	7.029	0.9191	-9.966	0.7058	3.839	-0.9971	5.215	0.7579	5.44
TCGA-DQ-7589-01	7.027	0.6608	5.901	0.058	6.63	5.827	5.385	-1.248	2.422
TCGA-QQ-A8VD-01	7.022	-1.392	7.236	-0.7834	5.533	4.689	4.52	-0.8339	-0.0425
TCGA-KT-A7W1-01	7.02	-0.2328	3.895	1.595	5.568	4.76	5.133	2.81	2.907
TCGA-VS-A9UY-01	7.009	0.4447	5.719	-0.2671	5.967	4.249	4.635	0.2642	2.263
TCGA-85-7844-01	7.008	0.8961	-9.966	1.252	6.612	5.105	5.186	1.804	1.496
TCGA-IE-A4EK-01	7.004	-0.5125	2.036	-1.884	5.497	4.121	4.344	-9.966	-9.966
TCGA-F7-A61W-01	6.989	0.8082	6.129	0.7916	6.311	6.021	4.866	1.911	1.651
TCGA-CV-7255-01	6.989	0.4967	-9.966	-1.181	5.954	5.199	4.869	-2.053	1.783
TCGA-CQ-5330-01	6.981	0.4865	-9.966	0.2522	5.936	5.786	4.589	-0.7108	-0.0725
TCGA-O2-A52V-01	6.969	1.177	-9.966	0.5859	6.357	5.88	5.163	-9.966	1.642
TCGA-CR-7389-01	6.967	1.561	-9.966	-1.831	4.789	4.109	3.483	-1.552	-9.966
TCGA-CV-5979-01	6.963	0.7058	4.608	-0.4719	6.133	5.845	4.723	-0.2328	-9.966
TCGA-CR-7369-01	6.949	1.328	2.379	0.044	5.841	5.228	4.577	-0.3752	1.585
TCGA-FD-A3B5-01	6.948	1.439	3.866	-0.3752	5.597	5.153	4.76	-2.114	4.063
TCGA-CV-6934-01	6.946	1.82	4.666	-1.994	5.388	5.174	4.527	-9.966	-1.056
TCGA-CV-5444-01	6.94	1.008	-0.2159	-1.248	5.871	4.823	4.38	0.0158	-9.966
TCGA-D3-A8GE-06	6.939	0.3907	6.655	0.0718	5.54	5.434	4.381	-9.966	0.346
TCGA-D6-8568-01	6.933	-0.9406	-9.966	0.8488	6.07	5.502	4.812	-9.966	-9.966
TCGA-L5-A4OM-01	6.928	0.6145	-9.966	2.067	4.941	0.605	5.44	2.098	6.648
TCGA-FD-A3B4-01	6.923	1.098	7.5	0.6145	6.878	6.743	5.366	2.141	0.8488
TCGA-WK-A8XS-01	6.923	-0.2845	-9.966	1.227	5.985	5.534	5.631	3.664	1.112
TCGA-CV-7091-01	6.918	0.058	1.496	-0.6416	6.071	4.929	4.762	-9.966	-9.966
TCGA-LN-A4A2-01	6.915	0.1648	-9.966	-0.0574	5.031	-9.966	5.508	-1.392	6.488
TCGA-CV-7252-01	6.914	0.9935	-9.966	-1.355	6.146	5.079	4.626	-0.5332	1.642
TCGA-CN-5361-01	6.909	0.4761	-9.966	-2.315	5.982	4.418	4.241	-9.966	0.1257
TCGA-BB-8596-01	6.909	-0.9971	3.42	-0.0277	5.967	5.189	4.745	-9.966	0.7493
TCGA-CQ-A4CG-01	6.907	2.121	2.167	0.3685	6.285	6.035	4.944	-0.7108	-9.966
TCGA-LN-A49X-01	6.901	1.501	-9.966	0.4125	4.938	-0.3383	5.408	-0.0574	5.776
TCGA-CN-6996-01	6.897	0.8082	-9.966	-0.2671	5.524	5.097	4.182	0.3573	-9.966
TCGA-VR-A8EU-01	6.894	-0.1187	-9.966	-0.7346	5.293	2.913	5.476	0.044	5.436
TCGA-IQ-7630-01	6.881	2.328	5.672	0.0718	6.106	5.57	4.706	-0.1993	0.7233
TCGA-CV-7177-01	6.88	-1.994	-9.966	-2.826	6.155	5.51	4.961	-0.4131	1.34
TCGA-CR-7376-01	6.874	-0.5756	-9.966	-2.727	5.216	4.56	3.906	-1.51	-9.966
TCGA-S8-A6BW-01	6.861	-0.1993	-9.966	0.0014	5.468	1.856	5.749	-0.6873	5.63
TCGA-90-6837-01	6.86	1.322	4.416	-0.4719	5.922	4.794	4.483	-0.6643	-0.5756
TCGA-LN-A9FR-01	6.853	1.015	-9.966	-0.3022	4.94	0.1388	5.454	0.8164	6.799
TCGA-CV-7261-01	6.852	1.406	-9.966	0.1519	6.358	5.905	5.253	1.071	-9.966
TCGA-CN-6011-01	6.852	-0.2328	-9.966	-0.1993	5.618	4.695	3.993	0.2762	-9.966
TCGA-CQ-7065-01	6.839	1.844	5.464	-1.056	5.118	5.059	3.97	-9.966	-9.966
TCGA-CR-7377-01	6.834	0.1519	-9.966	-2.245	5.63	4.547	4.28	-0.013	0.517
TCGA-DX-A3M1-01	6.834	-1.086	8.173	0.1257	5.91	5.272	4.59	0.517	2.319
TCGA-D8-A1XT-01	6.832	0.03	5.47	0.9935	7.019	6.274	5.471	1.774	3.283
TCGA-Z6-A8JD-01	6.829	3.386	-9.966	0.1648	5.109	0.2998	5.101	1.288	4.962
TCGA-CN-4725-01	6.829	0.8647	-9.966	0.0854	5.725	5.654	4.356	-0.1665	0.517
TCGA-CN-5373-01	6.823	0.4967	-9.966	-1.283	4.557	3.969	2.969	-1.214	-0.9686
TCGA-77-7338-01	6.819	0.5763	4.871	0.099	6.488	5.851	5.298	-0.7346	-9.966
TCGA-3B-A9HY-01	6.819	-0.4521	3.306	1.696	5.798	4.935	4.73	4.036	2.071
TCGA-22-4593-01	6.809	0.7407	-9.966	-0.0425	6.46	5.474	5.006	-0.394	1.215
TCGA-H7-8502-01	6.806	0.9568	-9.966	0.1776	5.909	6.01	4.923	-9.966	0.9493
TCGA-P3-A6T0-01	6.804	1.412	5.045	0.6425	5.713	5.112	5.095	-1.781	0.9038
TCGA-D6-6515-01	6.804	0.5069	-9.966	-0.8084	5.708	5.327	4.155	-1.318	-0.8084
TCGA-IG-A97I-01	6.794	2.053	4.488	-0.3022	4.939	-0.5543	5.068	0.2762	6.123
TCGA-CN-5355-01	6.791	1.665	-9.966	-1.552	5.38	5.05	4.045	-9.966	-9.966
TCGA-CN-5366-01	6.791	0.3573	3.75	-2.388	6.214	4.884	4.481	-1.595	-0.4921
TCGA-CR-7401-01	6.786	-0.3201	-9.966	-1.355	5.371	3.822	3.687	-9.966	-9.966
TCGA-CR-7368-01	6.785	0.8488	-9.966	0.537	5.497	4.155	4.027	-0.0574	1.036
TCGA-CN-5363-01	6.782	-0.1187	-9.966	-0.8084	6.399	5.211	4.739	-0.013	-9.966
TCGA-CQ-5326-01	6.782	-0.9406	-9.966	-0.8084	6.271	5.89	4.639	-0.1187	-9.966
TCGA-NK-A5CT-01	6.781	0.7748	7.591	1.816	6.487	6.478	5.235	0.7493	2.98
TCGA-CV-5435-01	6.78	1.892	-9.966	0.547	6.27	5.852	4.609	-9.966	-9.966
TCGA-BP-5198-01	6.776	0.24	-9.966	-0.4921	4.798	5.182	4.071	-0.394	-9.966
TCGA-UF-A7JA-01	6.773	0.9493	5.439	1.753	6.793	6.017	5.825	2.618	0.7321
TCGA-77-A5GB-01	6.769	0.9935	5.454	0.8568	6.04	5.83	4.654	-9.966	-9.966
TCGA-56-A4ZJ-01	6.768	0.1648	6.727	-0.4521	5.992	5.374	4.554	0.044	0.2642
TCGA-DX-A3UC-01	6.766	-2.178	8.154	1.264	5.423	5.476	4.118	1.812	-9.966
TCGA-CV-7235-01	6.765	0.8961	-9.966	-0.9971	6.033	4.127	4.234	-0.4131	0.058
TCGA-43-6647-01	6.765	0.2881	-9.966	-0.4719	5.164	3.936	3.384	1.118	-9.966
TCGA-LN-A7HX-01	6.762	1.118	-9.966	0.058	5.286	1.47	5.328	-1.086	5.558
TCGA-60-2711-01	6.762	0.9493	4.42	0.0718	6.124	5.219	4.438	1.551	-9.966
TCGA-HD-7832-01	6.762	0.8246	-9.966	-1.086	5.766	5.639	4.727	1.036	0.1903
TCGA-ZJ-AB0I-01	6.757	0.8164	5.982	1.196	6.025	6.012	5.382	0.7748	-9.966
TCGA-85-A4QQ-01	6.754	1.085	5.719	-0.3383	5.919	5.867	4.63	-9.966	-9.966
TCGA-CR-6471-01	6.754	0.679	-9.966	-1.431	5.036	4.52	3.565	-1.47	-0.7834
TCGA-VS-A8EB-01	6.754	-0.4921	6.936	1.209	6.506	5.095	5.518	1.637	4.396
TCGA-CV-7247-01	6.749	-0.7588	4.965	-1.595	6.021	4.978	4.92	1.368	2.105
TCGA-CV-6959-01	6.741	0.2277	-9.966	-0.4921	5.573	5.1	4.424	-0.1993	-9.966
TCGA-D6-6826-01	6.738	-0.5973	-9.966	0.3573	5.787	5.251	4.639	1.328	-9.966
TCGA-UD-AABY-01	6.728	0.4761	6.971	0.3573	5.402	5.032	4.826	-0.3022	-9.966
TCGA-BA-5149-01	6.728	0.2277	-9.966	-0.5125	5.852	5.555	4.494	-0.0574	-1.355
TCGA-DS-A1O9-01	6.72	0.4657	6.555	1.132	6.843	5.811	5.119	2.257	-0.7834
TCGA-UY-A8OB-01	6.716	0.6425	5.368	-0.6193	6.269	6.346	5.195	0.8246	0.2029
TCGA-VS-A9UL-01	6.716	-0.1665	5.566	2.319	6.809	4.646	5.603	3.091	3.946
TCGA-LN-A49M-01	6.708	1.967	-1.392	0.6608	4.489	0.8805	5.072	1.516	6.141
TCGA-L5-A43J-01	6.707	0.8246	-1.685	0.099	5.079	-0.8084	5.068	0.9038	5.796
TCGA-UF-A7JK-01	6.706	1.085	5.743	-0.0877	5.94	5.548	5.48	-1.47	0.4761
TCGA-HB-A3YV-01	6.706	-0.3022	4.893	0.3573	5.388	4.872	4.422	1.293	1.022
TCGA-CN-5364-01	6.704	0.1257	2.681	-1.781	6.196	5.459	4.667	-9.966	-0.7834
TCGA-70-6722-01	6.698	0.688	-9.966	-1.831	6.181	5.383	4.86	-1.831	-0.6873
TCGA-CQ-A4C6-01	6.696	0.3796	3.381	-0.7834	5.191	5.981	4.346	1.328	-9.966
TCGA-LN-A7HV-01	6.69	1.317	6.133	0.537	6.06	4.442	5.923	0.7579	5.714
TCGA-CN-A498-01	6.688	0.1648	-9.966	0.3907	6.07	5.76	4.612	-0.8339	-0.4921
TCGA-XF-A9T4-01	6.687	0.2029	5.948	-0.9971	5.467	5.251	5.666	0.2522	3.391
TCGA-BF-A3DN-01	6.678	0.2154	-9.966	0.3685	6.668	6.511	5.402	1.132	-0.5543
TCGA-CR-7379-01	6.677	0.7146	-9.966	-0.6873	6.406	5.181	4.953	-1.51	-9.966
TCGA-3B-A9I3-01	6.675	0.1388	5.484	0.3796	5.97	5.492	5.06	2.214	-9.966
TCGA-58-8386-01	6.671	1.585	-9.966	0.4657	5.949	4.897	4.72	0.3685	0.1903
TCGA-E2-A1LS-01	6.67	2.078	8.177	-1.431	6.132	5.599	4.522	-2.466	3.053
TCGA-3B-A9HR-01	6.664	0.1776	4.252	0.7664	5.429	5.276	4.979	2.848	2.167
TCGA-CV-7568-01	6.662	2.905	5.957	-0.3752	5.442	4.96	4.17	-9.966	3.053
TCGA-CN-6018-01	6.659	0.8883	-9.966	-1.595	5.746	5.16	4.192	0.1519	0.2642
TCGA-28-5204-01	6.648	0.4967	2.602	1.057	5.994	1.47	5.817	3.852	6.243
TCGA-D6-6517-01	6.647	0.3685	-9.966	-0.6416	5.95	4.905	4.621	-9.966	0.688
TCGA-CN-6989-01	6.644	0.8164	-9.966	0.346	6.12	5.475	4.87	0.6517	0.7407
TCGA-CV-6003-01	6.644	0.1257	5.135	-1.181	6.303	5.501	4.766	0.1776	-9.966
TCGA-CV-6961-01	6.641	0.7493	-9.966	-0.7834	5.992	4.986	4.61	1.293	-9.966
TCGA-DX-A48P-01	6.641	-0.8863	7.564	0.058	5.998	5.085	4.514	2.504	0.9862
TCGA-98-A538-01	6.639	0.8246	-9.966	0.9191	6.683	5.782	5.318	1.581	1.098
TCGA-77-8130-01	6.637	0.5666	6.815	-0.8084	5.731	5.122	4.38	-0.9132	-9.966
TCGA-CV-6952-01	6.635	-0.013	1.202	-0.3566	5.288	5.323	4.456	0.7579	0.5666
TCGA-BH-A0BD-01	6.634	0.3907	2.903	0.8647	7.614	6.619	6.668	2.322	2.067
TCGA-60-2713-01	6.632	1.125	-2.315	1.029	6.064	5.195	4.63	0.3685	-9.966
TCGA-WA-A7GZ-01	6.627	1.288	-9.966	0.4016	5.591	5.548	5.291	1.66	-9.966
TCGA-CV-7103-01	6.627	0.1124	3.971	0.03	6.332	4.56	4.599	-1.552	1.19
TCGA-CN-5367-01	6.621	-0.1504	1.911	-0.4521	6.263	4.512	4.676	-0.6643	0.3346
TCGA-P3-A6T3-01	6.62	1.836	5.722	0.0014	5.328	4.989	4.964	0.4447	-9.966
TCGA-77-8153-01	6.62	0.8246	-9.966	1.556	6.604	5.69	4.65	2.48	1.001
TCGA-CN-6016-01	6.619	0.5955	3.022	-1.086	5.08	4.478	3.515	0.044	-9.966
TCGA-DK-A1AB-01	6.619	-0.0277	4.891	-0.3022	5.929	5.591	4.21	-0.7834	0.0854
TCGA-BH-A0W3-01	6.618	1.258	-9.966	0.6969	6.739	5.716	5.275	0.7664	-9.966
TCGA-BB-7871-01	6.618	0.7832	7.65	1.132	6.779	6.584	5.407	0.5763	1.919
TCGA-21-A5DI-01	6.614	1.619	7.458	2.018	6.406	6.186	4.998	0.4125	2.725
TCGA-BA-6872-01	6.612	0.1257	5.986	-0.0574	6.253	6.259	4.99	0.099	2.05
TCGA-CV-7095-01	6.612	-0.6873	2.964	-1.831	6.119	5.631	5.048	0.8488	-9.966
TCGA-ZP-A9D2-01	6.61	0.3231	5.136	1.317	6.76	5.983	5.699	-0.1031	1.561
TCGA-2J-AABO-01	6.61	-0.5756	7.949	0.537	6.037	4.493	5	0.1388	3.618
TCGA-HD-7229-01	6.609	1.512	-9.966	-0.6416	5.776	3.765	4.121	-1.355	-9.966
TCGA-DQ-5624-01	6.609	0.5568	5.307	-1.355	5.687	5.091	4.14	-0.8599	-9.966
TCGA-60-2722-01	6.606	0.6145	-9.966	0.4865	6.446	5.741	4.992	1.022	0.1388
TCGA-92-8063-01	6.605	0.6517	4.226	1.27	6.56	5.932	5.521	1.576	2.18
TCGA-B9-5155-01	6.594	0.9038	2.71	-1.884	5.294	5.099	4.561	0.4761	-0.7346
TCGA-Q1-A73O-01	6.594	0.2762	3.177	0.5666	5.854	5.791	4.846	1.293	-9.966
TCGA-CR-7364-01	6.593	0.7233	-9.966	-1.392	5.761	5.059	4.846	-9.966	1.227
TCGA-EB-A44R-06	6.587	-0.8084	5.741	2.844	8.232	7.168	6.575	3.105	1.357
TCGA-22-5482-01	6.583	-0.4325	1.779	-0.0877	6.642	5.466	5.218	-0.394	-0.6873
TCGA-DQ-5625-01	6.581	0.0158	-9.966	-2.053	5.688	4.928	4.141	-9.966	-9.966
TCGA-W3-A828-06	6.574	0.058	6.294	1.064	5.992	5.216	4.561	0.2029	0.4447
TCGA-DX-A6BA-01	6.574	-0.3383	6.466	1.057	5.533	5.909	4.56	3.081	-9.966
TCGA-CN-6020-01	6.57	1.001	-9.966	-1.431	6.085	5.003	4.18	0.7579	-0.4921
TCGA-33-AASD-01	6.569	1.299	6.307	1.753	6.645	6.082	5.838	0.9191	2.208
TCGA-77-8145-01	6.564	0.605	3.077	1.19	6.238	5.195	4.605	1.481	2.954
TCGA-56-8628-01	6.562	-0.6873	-9.966	1.177	5.657	4.818	4.295	-9.966	-0.0277
TCGA-CV-7410-01	6.561	0.3685	-9.966	-1.431	5.524	5.099	4.195	-9.966	-9.966
TCGA-34-5236-01	6.56	0.7664	4.837	0.547	7.157	6.433	6.018	1.328	2.311
TCGA-L5-A4OQ-11	6.555	-0.9132	-9.966	-0.3383	3.671	-9.966	4.221	-1.149	5.273
TCGA-CR-7397-01	6.552	0.7146	-9.966	-1.318	4.561	4.695	3.859	-9.966	1.233
TCGA-LN-A9FP-01	6.55	0.5568	-9.966	-0.0425	4.639	-0.1665	5.112	-1.994	6.608
TCGA-BA-4078-01	6.548	0.5859	-9.966	2	6.846	5.599	5.021	-0.8599	-0.1031
TCGA-WA-A7H4-01	6.546	-0.5125	5.332	1.546	6.067	5.668	5.292	1.322	3.254
TCGA-CR-7398-01	6.545	0.1124	-9.966	0.7407	6.7	5.22	5.161	-0.1345	-9.966
TCGA-IQ-A61J-01	6.543	0.6699	3.757	0.1648	5.394	4.891	3.938	0.605	-9.966
TCGA-CV-7413-01	6.539	0.0158	6.74	-3.308	5.745	5.722	4.559	-0.5332	0.434
TCGA-VR-AA4G-01	6.532	1.05	3.21	0.2029	5.072	0.4447	5.366	1.239	6.188
TCGA-IG-A3YA-01	6.532	0.4447	-9.966	0.3685	5.157	-9.966	5.135	1.585	6.465
TCGA-CQ-5323-01	6.531	0.517	-9.966	-0.8084	5.875	4.569	4.128	-0.7346	0.1776
TCGA-A2-A0YM-01	6.531	0.24	0.434	0.5666	6.977	5.764	5.512	2.943	2.053
TCGA-CV-7104-01	6.53	-1.552	-9.966	-1.149	5.32	4.262	4.28	-0.1993	-9.966
TCGA-EA-A97N-01	6.52	0.6145	5.227	1.561	6.226	5.826	5.756	1.092	1.77
TCGA-A1-A0SI-01	6.52	-0.8339	4.247	0.9789	7.04	6.301	5.848	-0.1993	0.434
TCGA-E2-A1LL-01	6.519	-0.4719	5.828	-0.0725	7.031	6.133	5.309	-9.966	-9.966
TCGA-85-6175-01	6.513	-0.0425	3.2	-0.5756	5.362	4.392	4.185	-0.7834	-0.7834
TCGA-D6-8569-01	6.508	-0.5125	-0.1187	0.3907	6.121	5.16	4.698	-0.3383	0.547
TCGA-IG-A3Y9-01	6.507	1.202	-9.966	-0.9971	4.881	0.5568	5.266	0.099	6.662
TCGA-UF-A7J9-01	6.504	1.311	6.251	0.517	6.084	5.436	5.085	1.34	-9.966
TCGA-BA-5558-01	6.504	0.7664	-9.966	-1.283	5.692	4.984	4.115	-1.47	-9.966
TCGA-F7-8489-01	6.501	1.227	-9.966	-0.7834	5.343	4.626	4.187	-0.1828	0.8883
TCGA-CV-6956-01	6.501	0.3346	5.249	-0.5756	6.192	5.807	5.323	-1.51	-9.966
TCGA-FD-A43Y-01	6.5	2.658	6.493	0.5069	6.607	6.441	5.242	1.276	0.7058
TCGA-CV-7440-01	6.49	0.7321	-9.966	0.8164	7.011	5.938	5.953	1.541	0.3115
TCGA-CR-7390-01	6.489	1.029	-9.966	0.1124	6.224	4.351	4.984	1.481	0.7407
TCGA-BR-A4J4-01	6.484	-0.2159	4.454	0.4233	5.493	-0.1665	5.323	0.099	6.219
TCGA-JX-A5QV-01	6.483	1.74	8.144	0.9789	6.659	6.822	5.367	0.2998	-9.966
TCGA-IQ-A61E-01	6.474	0.8961	5.647	0.7999	6.411	6.371	5.3	0.4125	0.1903
TCGA-CN-4734-01	6.473	-0.7588	-9.966	-1.318	5.428	5.205	4.046	-1.392	-9.966
TCGA-85-8350-01	6.472	0.3796	-9.966	0.9789	5.84	5.537	4.745	0.058	1.516
TCGA-LN-A4A6-01	6.471	0.7493	-9.966	-1.248	4.571	-0.5332	5.049	0.3685	6.257
TCGA-CV-7435-01	6.47	-0.7588	-9.966	-1.026	5.346	5.898	4.544	-9.966	-0.7834
TCGA-DX-A2J0-01	6.469	-0.4325	7.648	1.585	6.409	6.057	4.968	-9.966	3.647
TCGA-50-5931-01	6.466	0.7058	5.603	2.922	7.611	7.309	6.408	3.797	4.165
TCGA-DX-A7EM-01	6.464	0.2762	-9.966	0.1519	5.293	4.68	4.749	2.649	2.653
TCGA-CV-7416-01	6.463	1.915	-9.966	-0.7588	5.735	4.736	4.261	-1.355	-9.966
TCGA-56-7582-01	6.463	0.1257	1.766	-0.4719	6.408	6.256	4.755	1.665	-9.966
TCGA-51-6867-01	6.46	1.281	0.7832	2.441	7.042	6.833	5.991	3.798	1.305
TCGA-KD-A5QS-01	6.46	0.4233	6.082	1.633	7.042	6.14	5.638	2.046	1.264
TCGA-CN-5370-01	6.458	-0.0277	1.39	-1.026	6.046	5.507	4.959	1.444	-9.966
TCGA-94-A5I6-01	6.457	0.9568	-9.966	1.239	6.763	6.188	5.16	-0.1345	2.614
TCGA-L5-A88S-01	6.456	-0.0425	5.297	0.9038	5.075	3.46	4.901	-1.283	4.997
TCGA-BR-A4IV-01	6.456	-2.466	3.713	0.03	4.394	-9.966	4.126	0.2277	5.318
TCGA-EE-A20I-06	6.455	0.9789	-9.966	0.6608	6.732	6.222	5.35	1.071	0.8647
TCGA-43-8118-01	6.455	0.4761	-9.966	1.566	6.197	5.844	4.923	1.637	-0.4325
TCGA-AO-A0J5-01	6.455	-3.171	2.595	0.4447	6.326	5.454	5.279	-0.2671	-9.966
TCGA-3B-A9HZ-01	6.45	-0.1187	5.637	-0.2159	5.546	4.734	4.784	1.945	1.064
TCGA-63-7020-01	6.443	0.8726	-9.966	0.1776	6.061	5.16	4.646	-0.5973	0.8164
TCGA-CR-7404-01	6.436	-0.394	-9.966	1.105	5.864	5.57	4.353	1.151	1.527
TCGA-BH-A0BJ-01	6.435	1.171	5.14	-0.5125	7.272	6.372	6.023	0.2522	-9.966
TCGA-ER-A195-06	6.434	0.6608	3.148	0.5763	5.686	4.323	4.394	1.417	1.964
TCGA-56-A4BY-01	6.429	1.334	4.448	1.872	6.348	5.988	5.285	0.4233	2.193
TCGA-RS-A6TP-01	6.423	0.1519	-9.966	1.022	5.638	4.937	5.047	0.24	0.4233
TCGA-RD-A8N2-01	6.423	-9.966	3.873	-0.6416	4.506	-0.2498	3.961	-9.966	5.201
TCGA-CN-5369-01	6.422	0.5955	-9.966	-0.4131	5.637	4.923	4.183	-9.966	-9.966
TCGA-21-1079-01	6.421	0.058	3.129	0.2154	5.936	5.391	5.089	0.7999	0.6332
TCGA-IF-A4AK-01	6.421	-0.2845	-2.548	1.688	5.484	5.188	4.651	4.596	2.882
TCGA-BA-5153-01	6.42	-0.1345	-9.966	-0.1504	5.826	4.734	4.075	-9.966	-0.1187
TCGA-CV-7430-01	6.416	0.9642	-9.966	-1.355	5.985	5.041	4.781	-0.0574	2.039
TCGA-QK-A8Z7-01	6.415	1.196	6.734	1.59	6.594	6.001	5.875	1.714	3.21
TCGA-CN-A499-01	6.415	0.9115	4.553	0.8805	6.404	6.293	5.131	0.099	-0.0877
TCGA-5B-A90C-01	6.413	-1.392	0.2522	2.989	7.493	6.179	6.302	4.695	3.414
TCGA-CV-7100-01	6.411	0.4761	-1.732	0.0718	6.358	5.825	5.206	1.688	-9.966
TCGA-DX-A23Z-01	6.411	-2.178	7.792	0.5069	4.959	5.833	4.298	1.953	-9.966
TCGA-06-2564-01	6.407	1.064	2.305	0.5763	5.137	-0.6643	4.963	1.651	5.225
TCGA-AZ-6605-11	6.405	-0.7588	3.133	-1.639	5.213	4.282	4.177	-1.181	-9.966
TCGA-DK-A6B5-01	6.399	0.7832	7.286	0.9343	6.108	5.948	4.991	0.434	-0.4521
TCGA-85-8288-01	6.394	0.24	-9.966	1.651	6.229	5.996	5.193	2.043	1.696
TCGA-CV-7178-01	6.393	0.9935	-9.966	-0.1828	6.776	5.772	5.45	1.396	-0.0877
TCGA-FP-8209-01	6.391	-2.548	-9.966	0.3907	3.841	-9.966	3.756	-9.966	4.282
TCGA-34-A5IX-01	6.384	1.434	6.638	1.132	6.729	6.135	5.121	1.029	3.98
TCGA-FD-A3SO-01	6.384	0.688	4.104	0.5763	6.085	6.081	4.885	-0.1504	0.4552
TCGA-FD-A3B3-01	6.384	0.3573	4.424	0.8408	5.994	5.852	4.495	0.1519	-9.966
TCGA-D6-6823-01	6.382	-0.4131	-9.966	0.2881	6.503	6.058	5.15	0.8647	-0.8599
TCGA-66-2780-01	6.381	-0.0425	-9.966	-0.3022	6.31	5.91	4.922	-0.8084	-9.966
TCGA-WK-A8XY-01	6.378	-0.7588	6.171	0.7321	5.687	5.534	5.27	3.281	1.84
TCGA-X6-A7WA-01	6.377	0.044	5.242	0.517	5.497	5.333	5.125	1.334	-2.053
TCGA-C8-A12L-01	6.376	0.3907	-9.966	1.132	7.17	5.906	5.587	1.47	1.455
TCGA-77-8139-01	6.376	-2.388	0.8164	1.258	6.075	5.54	4.719	2.053	1.868
TCGA-DX-A6Z2-01	6.37	-2.932	5.734	0.0014	5.553	5.054	4.713	2.511	0.9716
TCGA-CV-5976-01	6.367	0.2881	3.883	-0.7108	5.859	5.716	4.638	0.4761	-9.966
TCGA-33-4586-01	6.366	0.2881	3.809	0.5955	7.173	6.663	5.602	0.8082	0.7748
TCGA-K4-A4AC-01	6.363	0.9716	6.495	0.5955	6.283	6.192	4.895	1.328	1.585
TCGA-CN-4738-01	6.362	0.9191	-9.966	-0.394	5.001	4.609	3.962	-1.47	-9.966
TCGA-D8-A13Z-01	6.362	-0.9406	5.375	1.215	7.155	6.336	5.372	2.316	1.637
TARGET-50-PAJNVX-01	6.359	0.7579	6.287	1.799	6.782	6.41	6.55	4.496	0.6145
TCGA-BH-A0BR-01	6.359	-0.4131	4.03	0.2522	6.182	5.284	4.542	-1.938	-0.0277
TCGA-CR-6493-01	6.357	1.05	-9.966	-1.355	6.076	5.71	4.795	1.171	-9.966
TCGA-G2-A2EJ-01	6.356	-0.0425	5.273	0.2642	6.327	6.049	5.228	-0.8863	-9.966
TCGA-B6-A0WX-01	6.354	-0.1187	7.495	1.368	7.83	7.13	6.772	1.832	4.791
TCGA-T2-A6X0-01	6.351	1.345	3.921	1.491	6.33	5.63	5.734	1.791	1.233
TCGA-HM-A3JJ-01	6.351	0.044	6.45	0.6145	5.818	5.88	4.797	1.516	0.3115
TCGA-56-7579-01	6.351	-0.5756	5.568	0.1519	6.044	6.133	5.147	-1.732	-9.966
TCGA-CV-5442-01	6.348	-1.181	1.956	-0.013	5.595	5.075	4.099	-1.086	-0.6873
TCGA-CQ-A4CA-01	6.348	-1.355	5.95	-0.1031	5.951	6.052	5.054	0.0014	1.455
TCGA-CU-A3KJ-01	6.345	1.151	4.689	-1.086	5.725	5.543	4.399	-2.388	3.351
TCGA-V5-A7RC-01	6.339	0.434	-9.966	1.299	5.208	-0.7346	5.525	2.595	6.124
TCGA-CV-7253-01	6.339	-0.5332	-9.966	-0.8863	6.193	4.651	4.683	-0.4921	-9.966
TCGA-PC-A5DK-01	6.336	-9.966	4.302	0.0718	5.8	5.283	4.282	1.679	0.6332
TCGA-33-4587-01	6.335	0.7579	5.05	2.949	8.101	7.229	6.911	3.851	5.024
TCGA-OL-A97C-01	6.334	-0.3201	6	0.3685	5.957	5.38	5.801	0.9038	0.1776
TCGA-EV-5903-01	6.333	-1.938	3.766	-1.181	5.044	4.858	4.367	-1.355	-9.966
TCGA-58-A46N-01	6.332	0.3346	2.953	1.585	6.359	6.125	5.529	1.692	-9.966
TCGA-85-8351-01	6.331	0.099	-9.966	1.233	7.415	6.43	6.123	1.46	1.532
TCGA-22-5478-01	6.327	0.2642	1.812	-0.2159	6.203	5.123	4.529	1.496	0.24
TCGA-HL-7533-01	6.326	-0.5543	6.28	1.276	6.577	6.254	6.027	2.199	1.145
TCGA-IG-A3I8-11	6.322	-0.0877	-9.966	-1.552	3.039	-9.966	3.865	-0.5332	4.712
TCGA-34-8454-01	6.321	-0.0277	-0.1187	0.03	5.852	4.894	4.344	-1.214	-9.966
TCGA-QK-A8ZA-01	6.317	1.317	-9.966	1.595	6.551	5.07	5.864	0.5666	3.245
TCGA-BH-A1EO-01	6.315	0.1903	5.313	-0.7588	6.388	6.33	5.03	0.3573	-9.966
TCGA-A8-A07J-01	6.312	-0.8863	5.153	-0.7588	5.967	5.423	4.95	-2.114	3.763
TCGA-CQ-6227-01	6.309	1.227	5.004	-0.9971	5.586	4.822	4.211	-1.595	1.064
TCGA-CR-7392-01	6.307	-0.1187	-9.966	-3.458	5.091	4.013	3.623	-9.966	-9.966
TCGA-CQ-5334-01	6.307	-0.2328	-9.966	-1.994	5.765	5.253	4.401	0.058	-9.966
TCGA-A1-A0SH-01	6.306	-2.826	4.924	-0.9132	6.568	5.763	5.077	-9.966	-0.1187
TCGA-CR-7395-01	6.305	0.058	-0.4521	-1.938	5.796	4.436	4.521	0.9716	0.9568
TCGA-BI-A0VS-01	6.304	0.8327	4.797	1.455	6.399	5.997	4.971	0.7493	2.098
TCGA-19-2619-01	6.304	0.0854	4.666	1.19	5.805	1.171	5.552	2.936	5.483
TCGA-FX-A3NK-01	6.302	-0.9971	5.95	-1.392	5.489	5.463	4.992	0.2881	-9.966
TCGA-D8-A1X5-01	6.294	0.6145	-0.6643	0.4657	7.581	6.831	6.194	-0.394	1.669
TCGA-56-8503-01	6.29	-0.4921	4.708	-0.2671	6.045	5.62	4.53	-9.966	1.357
TCGA-E2-A10E-01	6.289	0.7146	5.522	0.7058	7.238	5.964	5.911	1.078	3.809
TCGA-CR-5250-01	6.288	0.0718	-9.966	-0.3383	5.354	5.031	4.138	-1.117	-0.1345
TCGA-GH-A9DA-01	6.287	0.4761	6.176	0.9935	6.14	5.216	4.924	1.112	1.125
TCGA-DX-A8BM-01	6.287	-1.831	4.498	1.071	5.941	4.905	4.803	2.884	2.718
TCGA-4Z-AA86-01	6.284	0.2762	5.735	0.7146	5.51	5.338	5.317	0.9419	4.543
TCGA-CV-6943-01	6.284	-0.4131	-9.966	-2.388	4.787	4.497	3.937	-0.013	-9.966
TCGA-MB-A8JK-01	6.283	-0.0425	5.947	0.4447	5.211	4.683	4.377	0.9343	-9.966
TCGA-IE-A6BZ-01	6.281	-2.548	1.566	-1.318	5.335	4.922	4.786	1.202	1.233
TCGA-BA-5555-01	6.277	0.2762	-9.966	-0.1504	6.207	6.08	5.132	-6.506	-9.966
TCGA-VR-AA7I-01	6.273	-0.9132	3.859	-0.394	4.961	0.9038	5.421	-0.1345	6.225
TCGA-46-3767-01	6.268	-0.9132	4.339	-0.394	6.392	5.217	4.657	1.779	0.8164
TCGA-DZ-6133-01	6.267	-0.0877	-9.966	-0.4921	5.057	4.618	4.197	-1.884	0.03
TCGA-VQ-AA69-01	6.265	-0.4921	-9.966	0.7146	5.468	-9.966	5.817	2.59	6.585
TCGA-4Z-AA82-01	6.264	0.3685	-9.966	1.209	6.839	5.511	5.573	0.9716	-9.966
TCGA-34-5928-01	6.263	0.8327	-9.966	0.7146	7.004	5.674	5.389	0.2029	0.1648
TCGA-ER-A196-01	6.262	-0.2498	4.544	-2.178	5.725	4.738	4.336	-9.966	1.979
TCGA-CN-4729-01	6.26	1.164	-9.966	-1.639	5.663	4.144	4.104	-9.966	-9.966
TCGA-CR-6492-01	6.258	0.2881	3.557	-0.5756	5.569	4.875	4.307	-3.171	-9.966
TCGA-34-5929-01	6.258	-0.2328	6.61	1.328	7.081	6.682	5.958	2.125	4.417
TCGA-BH-A6R9-01	6.258	-2.053	6.458	0.044	5.674	5.623	4.777	0.044	0.6699
GTEX-POMQ-1226-SM-3P61F	6.257	0.5069	4.24	0.044	4.97	0.6517	4.745	-9.966	4.339
TCGA-ER-A19B-06	6.256	0.8246	-9.966	0.0014	5.955	4.666	4.112	1.288	1.633
TCGA-34-7107-01	6.256	-0.7108	-9.966	0.547	6.228	5.654	5.012	-1.51	-0.8084
TCGA-BA-6870-01	6.255	-0.8599	4.902	0.0158	5.65	5.766	4.362	-0.4521	-9.966
TCGA-BA-5556-01	6.254	-0.0725	-9.966	-2.053	4.941	5.024	4.18	-1.355	0.5069
TCGA-CR-6473-01	6.253	-0.7108	2.046	0.6239	6.03	5.875	4.768	1.476	-0.4131
TCGA-CV-7432-01	6.252	0.5859	2.822	-1.355	6.206	5.674	4.958	1.015	0.4447
TCGA-BQ-5891-01	6.25	-0.2845	-9.966	-0.6416	6.549	6.098	5.202	1.215	-9.966
TCGA-GU-A42Q-01	6.249	1.233	4.371	-0.3022	6.3	5.5	4.858	-9.966	0.7321
TCGA-34-2596-01	6.249	-0.6193	-9.966	0.9419	6.57	5.586	4.942	1.808	-0.5973
GTEX-U3ZN-0726-SM-4DXT5	6.246	0.4967	5.489	0.7493	5.492	-9.966	5.071	0.3346	4.9
TCGA-CR-7372-01	6.245	-0.4325	-9.966	-1.994	5.049	3.89	3.85	-1.552	-9.966
TCGA-39-5019-01	6.242	1.064	4.138	0.4761	6.468	5.967	5.144	1.098	0.7233
TCGA-C5-A1MN-01	6.238	-0.2328	6.197	0.8408	6.914	5.375	5.255	1.008	1.692
TCGA-ZF-AA4W-01	6.236	0.9493	6.527	0.3796	6.208	5.723	4.912	0.7233	4.438
TCGA-CQ-7067-01	6.236	-0.6193	4.262	0.1776	6.529	5.755	4.666	0.2522	2.483
TCGA-DX-A48U-01	6.236	-1.431	5.601	-1.51	6.071	4.985	4.365	0.058	-9.966
TCGA-CQ-7063-01	6.232	-9.966	-9.966	-0.5332	5.227	4.602	4.313	0.099	-9.966
TCGA-V5-AASV-01	6.229	0.1903	4.428	0.9419	4.608	-1.732	5.095	0.6699	5.965
TCGA-JY-A6FD-01	6.228	0.8082	-9.966	-1.552	5.01	2.886	4.994	1.311	4.202
TCGA-ZJ-AAXD-01	6.228	0.6332	4.785	1.439	6.353	5.54	5.191	-0.4719	-9.966
TCGA-CR-7388-01	6.228	0.1124	-9.966	-0.2159	5.75	5.62	4.542	0.4967	-9.966
TCGA-90-A4ED-01	6.227	0.8488	6.082	1.795	5.454	5.516	4.247	0.5568	0.8726
TCGA-21-5783-01	6.226	2.316	-9.966	1.164	5.948	5.595	5.067	2.284	4.182
TCGA-22-4595-01	6.226	1.844	-9.966	0.0854	5.63	4.762	4.207	-0.013	-9.966
TCGA-CN-6013-01	6.226	-0.1504	-9.966	-1.086	5.465	4.817	3.714	-9.966	-0.6873
TCGA-VS-A8EC-01	6.226	-0.2328	6.811	1.27	6.485	6.262	5.944	1.896	5.096
TCGA-T2-A6X2-01	6.224	0.7058	2.193	-0.5756	5.546	4.363	4.662	-9.966	-9.966
TCGA-66-2768-01	6.224	-0.1665	-9.966	0.4016	6.674	5.936	5.057	-0.3201	-0.9971
TCGA-BA-4077-01	6.222	-0.3752	-9.966	-0.8084	5.998	4.654	4.394	0.1257	-9.966
TCGA-CR-7383-01	6.22	-2.635	6.588	-1.056	6.18	5.753	4.918	0.517	2.406
TCGA-DK-A3IM-01	6.213	1.008	5.28	0.3796	5.822	5.286	4.804	0.3796	5.091
TCGA-CZ-5988-01	6.212	-1.884	-9.966	-1.685	6.207	5.195	4.28	-9.966	-0.5756
TCGA-IB-7893-01	6.211	0.3231	4.262	-2.315	5.833	5.495	5.587	-0.3383	-9.966
TCGA-CV-7099-01	6.211	-0.0425	0.6969	-0.8339	5.79	5.507	4.592	-9.966	-0.1665
TCGA-56-7823-01	6.21	0.0158	3.674	0.7146	6.764	6.289	5.164	2.395	1.008
TCGA-85-A4CN-01	6.206	1.258	4.134	0.8647	6.228	6.166	5.435	0.4233	-9.966
TCGA-P3-A6T2-01	6.206	0.2762	5.911	0.5271	6.243	5.34	5.712	2.211	0.6517
TCGA-CV-7437-01	6.205	0.346	1.633	0.0014	5.953	6.013	5.041	-0.5543	-9.966
TCGA-IG-A6QS-01	6.203	1.078	5.434	0.1519	5.712	2.803	5.932	2.412	6.143
TCGA-76-4932-01	6.202	-0.3022	5.854	0.7058	6.145	2.791	5.818	2.899	6.179
TCGA-43-5670-01	6.198	1.036	5.416	-0.0277	5.709	5.088	4.536	-1.938	3.074
TCGA-56-8624-01	6.198	-0.1345	3.44	0.3346	5.454	4.456	3.796	-0.1031	-0.4719
TCGA-D6-6824-01	6.198	-1.47	-9.966	-0.7108	5.408	5.149	4.274	0.3796	0.6239
TCGA-CF-A1HS-01	6.196	-0.0277	5.833	0.1124	5.86	5.891	4.612	1.288	-9.966
TCGA-85-8666-01	6.194	-1.392	3.004	-0.4719	6.889	6.37	5.325	0.7748	-0.1345
TCGA-A2-A4RX-01	6.192	-0.4131	-9.966	-0.0877	5.649	5.317	4.537	1.158	-9.966
TCGA-DS-A0VK-01	6.19	-0.8599	7.051	0.2029	6.561	5.993	5.219	-0.1187	2.412
TCGA-CQ-A4CB-01	6.189	0.5763	3.592	0.7916	6.631	5.856	5.116	0.4233	0.9493
TCGA-CN-4728-01	6.189	0.5666	2.42	-1.214	5.145	4.339	3.702	-1.086	0.3573
TCGA-CN-6992-01	6.187	0.2642	-9.966	-0.013	6.089	5.902	5.017	-0.8084	0.3346
TCGA-CV-7097-01	6.186	-0.0725	-0.6873	-0.9406	6.211	5.538	4.928	-1.392	0.044
TCGA-CR-5249-01	6.177	-0.0877	-9.966	-1.149	5.018	4.702	3.788	0.2998	-0.5125
TCGA-77-8009-01	6.177	-0.8339	-9.966	1.705	6.38	6.076	5.766	2.491	5.787
TCGA-DQ-7588-01	6.176	-0.9406	5.754	-0.5543	6.221	5.929	4.868	-1.51	0.9716
GTEX-14AS3-1126-SM-5Q5CR	6.175	-0.0277	7.01	0.4125	5.172	-9.966	4.755	-9.966	4.941
TCGA-CR-5243-01	6.175	-0.3022	-9.966	-0.6416	5.369	4.877	3.934	-0.9971	0.7233
TCGA-60-2707-01	6.174	-0.5756	-9.966	-0.3752	5.835	5.056	4.405	-0.3022	-9.966
TCGA-IE-A3OV-01	6.173	-1.181	2.544	1.412	6.47	5.611	5.285	3.009	2.299
TCGA-CR-7371-01	6.171	0.5666	-9.966	0.1648	5.974	5.128	4.485	-9.966	1.428
TCGA-3B-A9HU-01	6.171	-0.6416	5.376	0.1388	5.857	5.293	4.86	3.379	0.3907
TCGA-E2-A1IL-01	6.171	-1.994	-9.966	0.8246	6.672	5.745	5.002	-9.966	1.791
TCGA-C5-A7CJ-01	6.168	0.346	4.965	0.7146	6.218	6.212	5.131	0.6517	0.605
TCGA-MA-AA3Y-01	6.167	0.6145	3.428	-0.0574	6.03	5.945	5.371	-0.2845	1.642
TCGA-CN-4741-01	6.167	-0.394	-9.966	0.2881	5.789	4.726	4.076	-0.4719	-9.966
TCGA-GD-A3OQ-01	6.165	0.2277	5.24	-0.4521	6.269	5.864	5.133	1.036	-0.0877
TCGA-BT-A20U-01	6.159	0.3115	4.99	-0.6643	6.149	6.035	5.044	0.9343	-9.966
TCGA-CU-A0YN-11	6.159	-0.3022	4.493	-0.2845	5.144	4.665	4.013	1.964	-9.966
TCGA-WK-A8XZ-01	6.158	-1.431	4.58	1.209	5.492	5.16	4.834	3.625	2.614
TCGA-CV-7446-01	6.157	-0.2671	4.097	0.3796	6.22	5.833	4.614	-9.966	3.829
TCGA-CQ-A4C7-01	6.153	0.9789	4.73	0.346	5.809	5.32	4.553	-2.053	-9.966
TCGA-43-7657-01	6.151	0.8246	3.671	-0.1665	6.366	5.683	5.315	0.2154	2.202
TCGA-34-2608-01	6.15	0.3796	-9.966	-0.3566	6.104	5.185	4.529	-0.0574	-0.7108
TCGA-HD-A4C1-01	6.149	0.4761	0.9419	0.1903	5.663	5.284	4.58	-9.966	0.7999
TCGA-E2-A1IO-01	6.149	-1.355	-9.966	0.9568	6.273	4.991	4.695	-1.392	-9.966
TCGA-VT-A80G-01	6.148	-0.1031	6.273	0.7579	6.545	4.886	5.542	2.186	2.311
TCGA-ER-A19D-06	6.147	0.8726	3.698	1.923	7.327	6.551	5.837	2.63	3.144
TCGA-34-8455-01	6.145	0.6425	-9.966	0.8408	6.536	5.105	4.791	1.036	0.2881
TCGA-77-6844-01	6.145	-0.7588	-9.966	1.723	7.264	6.029	5.611	1.674	0.3685
TCGA-FD-A3B7-01	6.144	0.1903	4.476	-0.9686	5.825	5.567	4.823	-0.0574	5.115
TCGA-56-7222-01	6.143	-0.6416	4.667	0.9191	6.673	6.725	5.587	0.3907	0.4657
TCGA-G2-A3IB-01	6.143	-1.47	6.227	0.688	5.768	5.524	4.912	-9.966	4.489
TCGA-CV-6945-01	6.142	0.9191	6.824	-1.026	5.432	5.607	4.31	-1.318	-9.966
TCGA-EK-A2GZ-01	6.141	0.4761	6.911	1.816	7.335	7.023	6.268	3.168	0.5763
TCGA-HZ-7925-01	6.141	-2.388	5.044	-0.4325	5.711	5.413	5.388	-0.8599	-0.394
TCGA-CV-A45U-01	6.14	0.8805	6.019	0.547	5.889	5.397	4.544	1.455	1.532
TCGA-2G-AAGY-01	6.14	-1.283	4.838	3.325	6.452	5.389	5.891	4.136	3.167
TCGA-66-2734-01	6.14	-1.431	-9.966	-0.0877	6.596	5.571	5.455	0.6239	-0.4921
TCGA-33-4533-01	6.138	-0.1504	4.773	2.043	6.952	6.774	6.044	2.454	1.132
TCGA-56-6545-01	6.138	-0.8599	0.8408	0.6517	6.363	5.159	4.748	1.057	-1.026
TCGA-60-2708-01	6.137	-0.6193	-9.966	0.058	6.154	5.083	4.632	-1.318	-9.966
TCGA-68-A59I-01	6.136	0.9862	4.667	0.4447	5.569	5.254	4.426	1.66	2.87
TCGA-LN-A9FO-01	6.133	1.723	3.783	1.791	4.973	-1.214	5.8	1.651	7.188
TCGA-22-1016-01	6.13	0.2998	1.571	1.824	6.934	5.693	5.536	1.705	2.738
TCGA-BH-A0B5-01	6.127	-0.4521	4.834	1.288	7.33	6.417	5.328	-1.355	0.2154
TCGA-MA-AA3Z-01	6.127	-2.635	6.312	0.5271	5.784	5.427	5.114	1.647	-9.966
TCGA-C5-A1BE-01	6.126	0.7579	6.316	0.8883	6.084	5.501	4.91	-0.2671	2.69
TCGA-C5-A7UC-01	6.125	1.856	5.358	0.7493	6.344	5.559	5.473	0.6969	-9.966
TCGA-LN-A7HW-01	6.124	0.4552	-9.966	0.5271	6.272	4.693	5.967	0.2998	4.348
TCGA-CV-A6K2-01	6.122	1.022	4.592	-1.884	5.555	5.224	4.403	-9.966	-9.966
TCGA-LN-A8HZ-01	6.122	0.6425	-9.966	1.015	5.925	2.473	6.18	2.29	6.73
TCGA-43-6771-01	6.122	0.1519	3.755	-3.171	5.369	4.397	4.119	-2.388	-9.966
TCGA-BB-A5HU-01	6.121	1.105	4.643	0.8726	6.081	5.845	4.726	0.537	-9.966
TCGA-N8-A4PN-01	6.121	0.8805	-9.966	3.726	8.193	7.798	6.61	5.037	3.343
TCGA-CN-5356-01	6.119	-0.1828	-9.966	-0.5756	6.082	5.521	4.824	-0.7834	-0.7108
GTEX-1399R-2126-SM-5K7WZ	6.119	-1.086	6.235	-1.392	4.242	-9.966	4.491	-9.966	4.706
TCGA-63-5131-01	6.116	0.1776	3.649	0.2762	6.719	5.949	5.199	1.656	0.6699
TCGA-IG-A3I8-01	6.115	0.4761	1.556	1.036	4.52	0.03	5.174	0.6239	5.693
TCGA-CX-7082-01	6.114	0.4865	4.115	0.7493	6.113	5.302	4.808	0.9935	1.551
TCGA-BH-A0AZ-01	6.114	-0.8599	5.349	-1.181	6.515	5.903	5.064	0.6608	-9.966
TCGA-E7-A7XN-01	6.113	0.3907	5.346	-0.1504	5.546	5.345	5.415	-0.1828	-9.966
TCGA-56-A4BW-01	6.113	-0.5756	4.771	-0.013	5.355	4.938	4.208	-1.149	0.6332
TCGA-CN-4723-01	6.11	1.183	-9.966	0.0158	5.444	4.889	4.268	-1.248	0.8164
TCGA-43-6770-01	6.11	1.105	-9.966	1.714	6.786	5.855	5.371	2.196	1.923
TCGA-P3-A6T4-01	6.109	0.9115	3.312	0.0158	5.268	4.827	4.906	0.7233	-9.966
TCGA-BH-A1EX-01	6.105	-0.4719	4.808	0.3115	6.86	6.3	5.37	-1.056	-2.388
TCGA-EX-A3L1-01	6.105	-1.056	4.731	-0.4131	6.116	6.108	4.908	0.537	-9.966
TCGA-2G-AAGX-01	6.105	-1.47	5.666	2.789	6.268	4.508	5.595	2.632	2.06
TCGA-56-8308-01	6.103	1.34	2.531	-0.7588	5.462	4.754	4.205	-9.966	-9.966
TCGA-77-7142-01	6.101	0.2998	3.638	0.7748	6.325	6.073	4.801	1.701	-0.3201
TCGA-CN-4736-01	6.101	0.2642	-9.966	-1.181	5.44	3.908	3.858	-9.966	-9.966
TCGA-28-5209-01	6.099	-0.7108	4.803	1.245	5.604	1.522	5.751	3.296	5.989
TCGA-A2-A0T7-01	6.097	-2.635	4.041	1.015	7.455	6.467	5.64	1.196	1.406
TCGA-UF-A71B-01	6.095	0.1776	5.55	0.6239	6.604	6.475	6.08	2.125	-0.0277
TCGA-86-6562-01	6.094	-0.5973	6.005	0.2277	6.833	6.149	5.595	1.264	0.4865
TCGA-06-1804-01	6.093	-1.214	-9.966	2.465	5.419	2.838	5.274	2.105	5.877
TCGA-BA-5151-01	6.092	-0.2159	-9.966	-1.355	5.451	5.06	4.032	-0.7588	-0.1187
TCGA-C8-A12Z-01	6.092	-0.3022	2.611	0.7321	7.558	6.883	5.917	1.444	1.029
GTEX-11ZU8-1126-SM-5EQ5K	6.091	-0.2845	7.278	-0.8863	5.213	2.993	4.429	0.0158	4.677
TCGA-DU-A7TJ-01	6.09	-0.6416	-9.966	1.701	5.569	4.767	5.053	2.26	0.3573
TCGA-EA-A5ZD-01	6.09	-0.6643	6.082	0.3796	6.384	6.202	4.902	0.1257	-0.1993
TCGA-CV-7428-01	6.088	0.8647	3.446	-1.149	5.606	5.217	4.299	-1.355	-0.4131
TCGA-CV-5436-01	6.088	0.3573	1.585	-0.4131	6.208	5.94	4.714	-0.4719	-9.966
TCGA-BR-A4IZ-01	6.087	-1.639	4.62	-0.7346	5.101	-0.4131	4.853	1.078	5.914
TCGA-BA-A6DG-01	6.086	-0.0877	6.569	0.2642	5.539	5.668	4.32	-1.781	0.547
TCGA-A7-A6VX-01	6.086	-0.8084	-9.966	1.719	7.093	6.568	6.342	2.331	2.69
GTEX-139YR-1626-SM-5IJGK	6.084	-0.3752	4.495	-0.0574	4.235	-9.966	4.621	0.0854	4.082
TCGA-UF-A71A-06	6.083	2.401	5.925	1.158	6.658	5.443	5.25	1.362	3.589
TCGA-EW-A2FR-01	6.081	-0.6873	3.938	0.5859	7.259	5.943	5.801	-0.3201	1.299
TCGA-91-6829-01	6.081	-1.938	0.1124	1.151	6.951	6.194	5.487	2.834	2.196
TCGA-VQ-A94P-01	6.081	-2.245	4.491	-1.318	3.591	-1.732	4.573	-1.355	5.469
TCGA-22-4605-01	6.08	0.346	3.496	-0.4921	6.375	5.009	4.874	-9.966	-9.966
TCGA-L5-A8NK-01	6.078	1.836	4.427	-0.4921	4.272	-1.884	4.737	0.0718	5.834
TCGA-AR-A1AR-01	6.078	0.7999	4.811	-0.1504	7.208	6.874	6.038	-0.6416	3.213
TCGA-27-1837-01	6.077	-9.966	4.036	0.688	5.223	0.8246	4.777	2.509	5.306
TCGA-UF-A7JJ-01	6.074	0.3231	4.786	0.4761	5.146	4.88	4.644	-0.2845	1.824
TCGA-CR-6491-01	6.074	-0.1187	-9.966	-1.51	5.382	5.082	4.219	0.03	-9.966
TCGA-CV-6940-01	6.074	-0.7108	4.283	-0.0725	6.324	5.833	4.939	-0.0574	-9.966
TCGA-CV-7422-01	6.073	0.6517	1.614	-0.4719	5.997	5.617	4.725	0.0014	-9.966
TCGA-D3-A3C6-06	6.072	0.9935	2.465	2.151	6.849	6.481	5.468	4.291	4.143
TCGA-BK-A4ZD-01	6.07	-1.086	6.216	1.541	6.744	6.179	4.756	1.501	0.7407
TCGA-QS-A744-01	6.068	-0.394	5.472	2.566	6.93	6.304	6.599	3.302	2.828
TCGA-CR-7394-01	6.065	0.3346	-9.966	-1.994	4.981	3.521	3.66	-0.9971	-9.966
TCGA-BH-A0DI-01	6.065	-1.026	5.537	-1.431	6.121	5.462	4.935	-9.966	-9.966
TCGA-BF-A5EO-01	6.064	0.2642	5.848	0.2277	5.642	5.543	4.336	0.8961	-0.1345
TCGA-CV-5966-01	6.062	0.1776	6.255	0.6145	6.776	6.621	5.378	2.59	1.6
TCGA-85-8479-01	6.062	-0.0277	6.948	0.9191	6.677	5.551	5.335	-1.552	3.194
TCGA-CV-7425-01	6.06	0.679	-9.966	-2.178	5.171	5.225	4.084	-1.026	-9.966
TCGA-CV-7089-01	6.06	-1.318	3.926	-1.283	6.02	3.487	4.491	0.3115	1.766
TCGA-E9-A229-01	6.059	-1.884	4.669	1.05	6.668	6.085	5.443	1.105	1.158
TCGA-BH-A1FH-01	6.058	-0.9686	3.772	-0.0877	6.343	5.267	4.708	-1.392	0.0158
TCGA-CQ-6218-01	6.056	0.9115	2.125	-1.552	5.5	5.186	4.517	-1.639	1.098
TCGA-EA-A3HT-01	6.056	0.2029	5.748	0.8246	6.592	5.682	5.299	-0.0574	-0.1031
TCGA-JW-A5VG-01	6.056	-1.248	7.229	2.004	6.492	6.477	4.992	2.141	2.025
TCGA-E2-A1IJ-01	6.055	-0.0425	6.574	-1.056	6.611	5.685	4.584	-9.966	-9.966
GTEX-XXEK-1826-SM-4BRVC	6.055	-1.056	6.022	1.221	4.408	-9.966	4.179	-9.966	4.695
TCGA-BH-A0C1-01	6.054	-0.8084	4.058	1.334	8.25	6.897	6.974	-0.6416	-9.966
TCGA-UZ-A9PJ-01	6.053	0.5271	6.292	-0.3752	5.317	5.217	4.725	-9.966	0.058
TCGA-ZF-AA56-01	6.052	-1.056	6.123	-0.4921	5.92	4.791	5.361	-0.5756	4.53
TCGA-A8-A07G-01	6.051	-1.117	4.603	0.5271	7.089	5.754	5.819	0.3231	1.164
TCGA-CV-6938-01	6.05	0.1124	6.249	-3.816	5.849	5.704	4.967	-9.966	-9.966
TCGA-CN-4733-01	6.049	0.03	-9.966	-2.388	5.108	4.356	3.703	-9.966	-0.1504
TCGA-77-8144-01	6.049	-0.013	-9.966	0.0158	6.701	5.908	5.421	2.658	1.551
TCGA-77-8150-01	6.048	-1.431	3.981	0.9038	6	5.459	4.302	-9.966	-9.966
TCGA-63-A5MH-01	6.048	-1.51	5.702	2.506	7.107	6.793	5.504	2.836	4.206
TCGA-HD-8224-01	6.047	-0.2498	-9.966	-0.8084	5.491	4.623	3.426	0.5666	-9.966
TCGA-FD-A5BY-01	6.046	0.8883	7.212	0.9191	6.777	6.897	5.756	2.649	-9.966
TCGA-BR-8384-01	6.046	-0.8599	-9.966	0.8408	4.674	2.316	4.088	0.1648	3.692
TCGA-06-0878-01	6.044	0.0158	4.949	0.4552	5.582	-9.966	5.513	-0.0725	5.804
TCGA-CV-A6JO-01	6.043	1.46	4.094	-0.5332	5.544	5.783	5.435	1.036	-9.966
TCGA-85-7710-01	6.043	0.0854	-9.966	2.616	6.387	5.566	5.63	3.191	3.294
GTEX-WY7C-1626-SM-4ONC8	6.043	-9.966	5.26	0.5859	5.272	-9.966	4.37	-9.966	3.401
TCGA-CV-A463-01	6.042	-0.0425	4.823	-0.1504	5.382	4.998	3.897	-1.056	-9.966
TCGA-CV-7438-01	6.041	-1.355	5.227	-0.4719	5.48	5.757	4.498	-9.966	-9.966
TCGA-BH-A0DV-01	6.041	-3.171	5.785	-2.932	6.037	5.988	4.976	0.2642	-9.966
TCGA-MT-A51X-01	6.04	0.1124	4.794	-1.431	5.79	4.981	4.634	-0.9971	-9.966
TCGA-DX-A1KZ-01	6.04	-1.248	6.499	-0.6873	4.719	4.956	3.712	-9.966	0.5069
TCGA-CQ-6223-01	6.039	0.7493	-9.966	-0.4521	5.131	4.69	3.77	-9.966	-0.8339
TCGA-P3-A6T7-01	6.037	-0.0725	5.859	0.5069	5.854	5.144	4.975	-0.4131	0.1124
TCGA-85-8072-01	6.037	-0.1828	2.345	2.022	6.9	6.775	5.558	2.328	0.8805
TCGA-H7-A6C4-01	6.036	-0.9971	6.077	-0.5973	5.186	5.482	4.428	-0.8599	-9.966
TCGA-DX-A1L2-01	6.034	-2.826	6.696	0.099	4.31	4.774	3.379	-9.966	-9.966
TCGA-EJ-7123-11	6.033	-1.51	2.208	-2.635	4.744	4.766	3.796	-9.966	0.6517
TCGA-QK-A6IH-01	6.032	0.1388	7.524	-0.4131	5.682	6.433	4.485	0.044	-9.966
TCGA-MT-A51W-01	6.029	-0.1187	4.039	-0.7588	5.274	5.647	4.109	0.6145	-9.966
TCGA-2G-AALX-01	6.028	-1.831	5.936	1.736	5.876	5.165	5.32	2.685	-1.51
TCGA-CX-7219-01	6.027	-0.4719	-9.966	-1.355	5.741	3.105	4.088	-9.966	0.2522
TCGA-CQ-6220-01	6.026	-0.8863	4.285	-1.994	5.025	4.152	3.758	-9.966	-9.966
TCGA-LN-A5U7-01	6.024	-0.3022	-9.966	-0.1993	5.064	2.932	5.122	0.4016	4.844
TCGA-CN-5359-01	6.024	-1.086	-9.966	-0.4131	6.289	5.116	4.704	-0.2671	-9.966
TCGA-CX-7085-01	6.023	0.7664	-9.966	-2.548	4.875	2.808	3.106	-0.5543	-9.966
TCGA-NC-A5HF-01	6.021	0.9419	5.648	2.189	6.566	6.106	4.875	-0.9686	2.154
TCGA-C5-A1BL-01	6.02	-0.8084	4.383	1.749	6.73	6.097	5.306	1.401	1.585
TCGA-FX-A3TO-01	6.019	-0.0574	5.662	-0.7834	5.782	5.453	4.36	-0.9686	-0.1345
TCGA-C9-A480-01	6.018	0.1903	4.957	0.3573	5.359	4.788	4.021	-9.966	-9.966
TCGA-CV-A6K0-01	6.017	-0.1828	4.916	0.7321	5.8	4.484	4.765	-1.318	-9.966
TCGA-14-1034-01	6.016	0.4125	4.23	-0.3022	4.286	2.822	4.773	0.4016	3.296
GTEX-XV7Q-2226-SM-4BRVY	6.014	-2.388	6.129	-0.0877	4.898	1.688	4.855	-9.966	4.927
TCGA-E2-A15L-01	6.013	-0.7346	4.628	0.8488	7.151	6.688	5.51	-0.4719	-9.966
TCGA-HD-7754-01	6.013	-0.8084	-9.966	-0.1187	6.387	5.485	5.154	-1.355	1.357
TCGA-EA-A3HS-01	6.013	-1.086	4.455	1.233	6.258	5.641	5.094	1.491	1.692
TCGA-DX-AB2H-01	6.013	-2.826	6.334	1.47	6.579	5.589	5.637	3.128	0.346
TCGA-CQ-5327-01	6.009	0.7999	4.931	-1.552	5.763	5.176	4.798	-1.831	-9.966
TCGA-DX-A3LW-01	6.006	-1.181	7.811	0.7058	6.514	5.766	5.117	0.4233	0.2154
TCGA-DX-A7EN-01	6.006	-1.685	5.859	1.258	5.834	5.389	5.029	3.602	-0.5543
TCGA-FR-A3YO-06	6.005	0.8488	-9.966	0.2277	5.567	5.581	4.348	1.679	1.848
TCGA-56-8083-01	6.004	-1.056	-9.966	2.588	6.712	5.924	4.951	3.505	1.516
TCGA-CV-7406-01	6.003	-0.2845	0.2522	-1.117	5.94	5.51	4.629	-1.392	0.5859
TCGA-94-7557-01	6.003	-2.826	3.77	1.491	7.241	6.928	6.364	2.836	3.144
GTEX-Q734-2226-SM-3GAD9	6.002	0.3907	4.405	0.3231	5.161	-9.966	4.586	-9.966	-9.966
TCGA-CR-7367-01	6	0.2522	-9.966	-1.214	5.313	4.867	4.252	-1.938	-1.026
TCGA-D8-A1XB-01	6	-2.245	4.487	0.8082	6.95	6.248	5.682	-9.966	-9.966
TCGA-21-5782-01	6	-9.966	4.067	-0.0574	6.101	4.965	4.384	0.9789	-9.966
TCGA-55-8614-01	5.999	-0.7346	3.405	1.541	5.95	4.726	4.512	1.151	2.105
TCGA-JW-A5VL-01	5.998	-3.308	5.862	0.8568	5.89	6.101	4.666	0.3231	-9.966
TCGA-VR-A8EW-01	5.997	2.462	-9.966	-0.1828	5.681	-1.51	5.788	0.9115	6.225
TCGA-DK-A3IQ-01	5.997	-0.3566	6.486	-0.9686	4.791	5.026	4.37	-1.47	2.93
TCGA-AO-A03U-01	5.997	-9.966	2.848	-1.117	5.2	4.568	4.377	-2.178	-9.966
TCGA-GC-A3YS-01	5.995	-0.0277	7.083	1.345	6.808	6.786	5.454	1.665	2.018
TCGA-EB-A550-01	5.994	-0.3201	4.496	0.2881	5.526	5.545	4.399	-1.781	2.678
TCGA-LA-A446-01	5.993	1.105	3.489	1.444	6.776	6.691	5.453	1.417	0.1124
TCGA-CV-6941-01	5.993	-1.884	2.725	-0.5543	5.856	5.973	4.747	0.434	-9.966
TCGA-66-2792-01	5.992	0.0718	-9.966	0.8327	6.48	6.007	5.158	0.7664	1.092
TCGA-CV-7427-01	5.992	-0.6193	-9.966	-1.51	5.18	5.04	4.02	-0.394	0.4761
TCGA-85-8582-01	5.987	0.1648	-9.966	0.2762	5.51	5.702	4.599	1.177	-9.966
TCGA-AR-A24M-01	5.987	-1.117	4.554	-0.7108	7.489	6.351	5.757	-0.3201	1.078
TCGA-CQ-6229-01	5.986	0.4967	4.892	-0.7108	5.447	5.438	4.44	-0.3022	0.4657
TCGA-BT-A3PJ-01	5.985	0.3573	3.609	-0.6873	5.678	5.353	4.49	-1.639	0.7233
TCGA-AJ-A3NH-01	5.985	0.2522	6.791	3.329	7.227	6.393	5.903	2.939	4.212
GTEX-XXEK-1926-SM-4BRVD	5.984	-0.8599	5.095	1.368	5.263	-9.966	4.574	-9.966	4.608
GTEX-12WSG-2426-SM-5EQLZ	5.982	-0.2845	6.783	0.044	5.466	-9.966	4.715	-9.966	4.67
TCGA-UF-A7JT-01	5.981	-0.2159	6.939	0.3231	5.883	5.8	5.67	1.334	1.373
TCGA-06-0157-01	5.981	-0.3201	2.519	1.351	5.238	-0.1504	5.267	2.852	5.199
TCGA-BR-6458-01	5.981	-0.5756	-9.966	-0.6416	4.363	-0.6193	4.643	0.7058	5.641
TCGA-D8-A27H-01	5.981	-0.6873	4.236	0.6969	6.219	5.522	4.84	0.9191	1.125
TCGA-A8-A08Z-01	5.979	0.24	4.407	0.6332	6.96	6.617	5.845	-9.966	-9.966
TCGA-51-4081-01	5.979	-1.056	3.535	0.7407	6.506	5.649	5.057	1.642	1.623
TCGA-85-8481-01	5.978	-0.1031	4.953	-1.149	5.397	4.834	4.539	0.099	-9.966
TCGA-D8-A1XM-01	5.978	-1.214	1.221	0.517	6.671	6.215	5.326	1.546	-9.966
TCGA-CR-5247-01	5.977	0.7146	5.013	-2.053	6.381	4.517	4.635	0.3115	-9.966
TCGA-66-2786-01	5.977	-0.1031	-9.966	0.346	6.456	5.463	5.018	2.278	-0.8339
TCGA-DS-A0VL-01	5.977	-0.3022	5.765	1.34	6.449	6.054	5.161	1.209	2.011
TCGA-C5-A7CK-01	5.976	-0.9406	4.581	2.043	6.65	6.279	5.335	2.354	1.252
TCGA-CR-7370-01	5.973	-0.0277	-9.966	1.215	6.289	5.67	5.025	0.4865	-9.966
TCGA-39-5024-01	5.973	-0.2159	5.751	0.0718	6.526	5.818	5.209	-0.2328	1.923
TCGA-A8-A097-01	5.971	-0.6873	4.851	0.6239	7.118	5.883	6.038	1.085	1.276
TCGA-VS-A9UJ-01	5.97	0.7058	3.277	1.551	6.125	5.935	5.036	0.9268	1.258
TCGA-CV-7245-01	5.97	-0.1504	-9.966	-0.5543	5.565	4.782	4.399	-1.595	0.5763
TCGA-DK-AA6L-01	5.969	1.423	7.122	1.357	6.569	5.294	5.554	-0.1993	4.019
TCGA-HT-A5RA-01	5.968	-0.7108	-9.966	0.7321	5.735	5.099	4.564	2.211	0.1776
TCGA-T2-A6WX-01	5.967	-0.1665	6.713	0.3907	6.134	6.239	5.457	1.098	-9.966
TCGA-06-5856-01	5.964	-0.3022	6.119	1.171	6.112	1.476	5.939	2.409	6.533
TCGA-A7-A26H-01	5.963	-2.548	-9.966	0.8246	7.094	6.214	5.633	0.679	2.084
TCGA-BH-A208-01	5.961	-2.932	6.049	-0.9971	5.615	5.595	4.317	-1.595	-9.966
TCGA-KU-A66T-01	5.96	0.346	3.844	0.605	6.492	6.438	5.341	1.345	1.118
TCGA-AR-A2LQ-01	5.96	-1.086	2.534	0.2277	5.98	4.935	4.858	0.2277	-9.966
TCGA-CQ-7072-01	5.959	1.022	6.439	0.4552	5.785	5.394	4.399	0.1648	-9.966
TCGA-IF-A4AJ-01	5.959	-0.7108	5.296	1.915	6.299	5.446	4.785	2.311	3.24
TCGA-DW-7842-01	5.959	-1.056	2.588	-0.1993	5.163	4.459	4.889	-0.5332	0.8961
TCGA-IG-A51D-01	5.958	-2.727	-9.966	0.537	5.297	0.8883	5.872	2.254	5.964
GTEX-WHPG-1626-SM-4M1ZL	5.958	-9.966	5.545	0.1519	4.921	-0.5973	4.274	0.605	-9.966
TCGA-DS-A7WF-01	5.957	-1.884	5.38	0.9038	5.526	5.441	5.638	2.128	2.576
TCGA-BH-A0AU-01	5.957	-2.315	-9.966	0.4761	6.59	5.724	4.942	-0.5543	-9.966
TCGA-EB-A3HV-01	5.956	-1.181	4.261	-0.6873	5.409	5.26	4.186	-0.5756	-9.966
TCGA-56-5898-01	5.955	0.8164	3.958	0.9642	6.52	5.86	5.156	0.346	1.701
TCGA-66-2765-01	5.955	-1.117	-9.966	-1.248	6.021	5.671	4.762	-0.8084	0.2642
TCGA-X6-A7WB-01	5.955	-2.727	4.741	1.465	6.815	5.985	6.298	3.776	0.4967
TCGA-DU-A7TD-01	5.954	-0.9406	2.919	6.597	10.1	9.676	9.763	7.505	6.31
TCGA-21-1071-01	5.951	0.8961	6.082	0.8647	7.228	6.414	5.484	1.125	2.814
TCGA-IZ-8196-01	5.948	0.0854	-9.966	-0.2845	5.288	4.169	4.927	-9.966	0.9038
TCGA-E9-A1NG-01	5.948	-1.355	5.626	-1.117	6.564	5.661	4.956	-0.7108	-9.966
TCGA-IB-7890-01	5.948	-9.966	4.833	-0.8599	5.508	5.285	4.879	-0.4719	-0.9132
TCGA-F7-7848-01	5.946	-0.1031	-9.966	-0.1993	5.832	4.979	4.9	-1.248	-9.966
TCGA-CN-6010-01	5.946	-0.3566	-9.966	-0.5543	6.078	5.809	4.769	-0.3566	-9.966
TCGA-D8-A1JU-01	5.946	-1.994	5.129	-0.2845	6.397	5.467	5.378	-0.3201	-9.966
TCGA-LN-A4A9-01	5.944	2.356	6.814	0.517	3.976	-1.026	4.662	-0.0725	5.957
TCGA-FS-A1ZN-01	5.942	-0.0574	4.206	1.19	6.348	6.705	5.655	1.808	3.014
TCGA-A8-A09N-01	5.94	-0.3022	1.05	0.2998	7.231	5.559	5.346	1.779	-9.966
TCGA-C5-A1BJ-01	5.94	-0.6643	5.262	1.566	6.407	5.675	5.201	1.808	3.953
TCGA-DG-A2KL-01	5.938	-0.0277	5.363	0.4233	6.173	6.122	5.18	1.848	-9.966
GTEX-11P81-1626-SM-5BC52	5.938	-0.3022	5.815	1.245	5.634	1.078	5.176	-9.966	5.476
TCGA-CV-5432-01	5.938	-0.5125	5.456	-0.1504	6.498	5.4	5.135	0.4016	1.145
TCGA-25-2042-01	5.937	-2.826	-9.966	-0.2671	4.306	-1.318	4.16	-0.0425	5.195
TCGA-XP-A8T6-01	5.936	1.276	-9.966	-0.2159	5.613	2.964	5.578	0.8408	4.965
TCGA-90-7964-01	5.936	-0.2498	5.554	1.496	6.49	5.883	4.81	-0.5756	3.251
TCGA-Y8-A8S0-01	5.936	-0.9686	6.424	-0.1187	5.246	4.852	4.986	-1.47	-0.3201
TCGA-BR-8380-01	5.936	-1.884	-9.966	0.0158	4.561	-2.826	4.022	0.7832	4.43
TCGA-55-7726-01	5.935	1.486	5.621	0.5859	5.962	5.941	4.478	0.8726	-9.966
TCGA-RD-A8N4-01	5.935	-3.458	4.164	-0.3383	4.98	2.015	4.108	-9.966	5.31
TCGA-18-4083-01	5.934	1.486	3.982	2.046	6.346	5.31	4.769	-0.0425	0.2522
TCGA-EE-A29D-06	5.934	0.6699	3.671	0.6425	6.871	6.68	5.652	0.8805	0.2154
TCGA-L7-A56G-01	5.932	0.3231	-9.966	0.4447	5.066	-3.816	5.354	0.8408	6.07
TCGA-IE-A4EH-01	5.932	-1.318	6.882	0.9642	6.246	6.336	4.974	2.787	2.29
TCGA-UF-A7JC-01	5.931	1.177	-9.966	0.1519	5.013	4.678	4.831	0.3907	-9.966
TCGA-21-1080-01	5.931	0.2881	-9.966	-0.7588	6.345	5.844	5.251	-9.966	-9.966
TCGA-CR-7365-01	5.931	-0.5543	-9.966	-1.994	5.349	4.949	4.014	-1.639	-9.966
TCGA-CV-6935-01	5.93	-1.639	-9.966	-1.026	6.158	5.524	5.16	-0.9406	-9.966
TCGA-77-8133-01	5.93	-2.388	4.506	0.8408	5.889	6.097	4.665	1.145	-9.966
TCGA-VR-A8EO-01	5.929	0.6145	3.995	2.245	6.756	2.604	6.979	4.367	7.376
TCGA-CV-6960-01	5.929	-0.0574	3.736	-0.9686	6.104	4.735	4.728	0.2154	2.521
TCGA-F2-7273-01	5.929	-1.685	-9.966	-1.117	5.179	4.532	4.403	-1.248	-9.966
TCGA-61-1738-01	5.928	0.3231	3.154	0.4552	5.455	-0.394	4.952	1.556	5.396
TCGA-CQ-7068-01	5.928	-0.7108	5.086	-0.4325	5.691	5.436	4.312	-0.6193	-9.966
TCGA-85-6798-01	5.927	0.0014	6.053	0.537	6.844	6.662	5.585	1.745	0.517
TCGA-BG-A3EW-01	5.927	-0.1993	4.55	2.26	7.284	7.046	6.394	4.379	3.786
TCGA-EE-A2MQ-06	5.926	0.5271	-9.966	0.346	6.614	4.539	5.06	0.517	1.566
TCGA-33-AASJ-01	5.926	0.5069	5.788	1.876	6.382	6.537	5.674	-0.2498	1.351
TCGA-66-2742-01	5.926	-0.0877	3.65	-0.5543	6.447	4.89	4.687	-9.966	-9.966
TCGA-BB-7863-01	5.925	0.4657	-9.966	-1.938	5.463	4.985	3.95	-9.966	-0.6416
TCGA-CN-4726-01	5.925	-1.994	-9.966	-2.178	4.98	4.242	3.738	-9.966	-9.966
TCGA-S4-A8RO-01	5.924	0.24	6.638	0.4761	6.206	5.917	5.358	0.8647	0.7916
TCGA-VS-A94X-01	5.923	-0.0425	5.309	1.791	7.08	6.261	6.121	3.323	2.778
TCGA-C5-A0TN-01	5.923	-1.056	6.127	0.7916	6.848	5.942	5.036	1.34	2.331
TCGA-WK-A8XQ-01	5.92	-0.9971	3.343	1.112	6.338	5.563	5.642	1.934	0.7579
TCGA-C5-A1BN-01	5.919	0.3115	-9.966	0.8082	7.694	6.138	5.83	2.404	0.6425
TCGA-UC-A7PD-01	5.919	0.1648	5.933	0.9789	6.166	5.718	5.602	1.96	1.714
TCGA-D3-A1Q8-06	5.919	-0.0877	4.426	0.3231	6.689	5.922	5.426	2.199	2.72
TCGA-A2-A0YD-01	5.917	-0.7834	2.872	0.9789	7.368	5.874	6.192	-0.8084	2.509
TCGA-DX-AB35-01	5.916	-1.318	7.075	-0.5756	6.36	5.135	4.962	2.42	-9.966
TCGA-33-4547-01	5.913	-0.8599	5.709	0.688	6.211	5.593	5.024	-0.1504	0.5069
TCGA-CN-6023-01	5.912	-1.47	-9.966	0.9191	6.641	6.176	5.198	1.215	-0.5125
TCGA-DU-6406-01	5.912	-1.639	-9.966	1.098	5.852	3.964	4.844	2.118	3.458
TCGA-SG-A6Z7-01	5.911	-0.7346	4.628	1.357	5.557	6.301	5.726	2.395	1.138
TCGA-IG-A50L-01	5.91	0.7999	-9.966	0.4657	5.759	2.83	6.191	1.546	7.042
TCGA-E2-A15I-01	5.91	-0.2159	4.831	0.8961	6.124	5.55	4.694	-9.966	1.239
TCGA-D8-A143-01	5.909	1.092	4.81	0.7999	7.597	6.611	6.058	1.669	1.215
TARGET-50-PAJNSL-01	5.908	-2.178	3.365	2.447	6.894	6.517	6.656	5.174	2.637
TCGA-BF-A3DM-01	5.906	1.098	-9.966	1.401	7.066	6.27	5.615	3.654	3.084
TCGA-DU-8165-01	5.906	-1.149	-9.966	1.696	6.438	5.937	5.42	3.716	2.251
TCGA-CN-5360-01	5.906	-2.466	-9.966	-0.2328	5.572	4.407	4.118	1.293	-9.966
TCGA-56-7731-01	5.905	-0.1993	5.197	0.1388	5.809	5.712	4.975	0.1519	2.718
TCGA-CV-A464-01	5.904	0.1776	5.609	-0.4921	5.91	5.665	4.661	-9.966	1.125
TCGA-CN-A49A-01	5.903	0.4761	5.704	0.547	5.879	5.467	4.466	-9.966	0.3573
TCGA-XF-AAMT-01	5.903	-0.5973	5.735	2.602	6.163	5.471	4.963	0.605	-9.966
TCGA-L5-A43H-01	5.902	0.7058	2.278	1.118	4.967	-5.012	5.372	0.7832	6.586
TCGA-ZH-A8Y2-01	5.902	0.2522	3.202	1.907	7.167	6.202	5.817	1.151	-9.966
TCGA-56-7822-01	5.901	0.7832	-9.966	-0.0725	5.26	4.689	4.346	-0.1828	1.979
TCGA-71-8520-01	5.901	-1.056	4.295	0.3685	6.548	5.532	4.912	-0.0877	-9.966
TCGA-22-5472-01	5.901	-1.392	2.071	-0.0574	6.317	5.933	4.865	-0.2328	-9.966
TCGA-ER-A42K-06	5.9	0.2642	4.48	0.8246	6.815	6.472	5.333	2.242	0.6425
TCGA-DK-A3IN-01	5.899	0.044	5.245	0.4865	6.094	5.5	5.205	0.3796	5.362
TCGA-92-7340-01	5.898	0.688	5.458	-0.5973	6.466	6.149	5.415	-0.0725	-9.966
TCGA-CV-7102-01	5.898	0.0014	-9.966	-0.5973	6.643	4.986	5.016	1.105	2.465
TCGA-21-1072-01	5.897	-0.8084	5.46	0.9789	7.554	6.454	6.136	2.281	1.357
TCGA-AR-A2LM-01	5.896	-0.3022	2.787	0.6969	6.773	6.137	5.382	0.6517	2.623
TCGA-CV-7183-01	5.896	-1.026	-9.966	-3.308	4.867	4.636	3.921	-9.966	-9.966
TCGA-LN-A9FQ-01	5.895	-0.7588	-9.966	0.5069	5.731	1.571	6.36	0.7407	7.359
TCGA-BH-A0EB-01	5.893	-0.6193	5.605	-0.5332	6.597	5.512	5.497	-9.966	0.517
TCGA-CV-6939-01	5.89	0.3685	3.043	0.3573	5.97	5.319	4.703	1.732	1.252
TCGA-FU-A3HY-01	5.89	0.3231	4.812	0.6239	6.788	6.176	5.278	0.2029	2.135
TCGA-CQ-A4CH-01	5.89	0.099	-9.966	0.7146	5.802	5.773	4.575	-9.966	-9.966
TCGA-AN-A0FN-01	5.89	-1.51	6.508	-0.7346	6.257	5.672	5.089	-0.8339	3.793
TCGA-BR-A453-01	5.89	-1.639	5.512	-1.149	4.685	-9.966	4.26	0.1519	5.835
TCGA-56-8622-01	5.889	0.24	5.676	-0.6416	5.24	4.721	4.597	-9.966	1.233
TCGA-CQ-6228-01	5.887	1.486	5.029	-0.3383	6.31	5.95	5.161	0.7579	1.328
TCGA-CQ-5324-01	5.887	0.1648	-9.966	-2.826	5.79	5.378	4.369	-9.966	-9.966
TCGA-AJ-A3NE-11	5.887	0.1124	5.205	0.5271	5.807	5.909	5.183	0.8327	1.015
TCGA-BR-8364-01	5.887	-1.595	-9.966	-0.9132	5.207	1.125	4.509	-0.2845	5.468
TCGA-A1-A0SB-01	5.887	-2.388	3.637	0.2881	6.515	6.148	5.349	0.3907	2.39
TCGA-XF-AAMW-01	5.885	-9.966	4.321	0.2277	6.082	5.759	5.145	1.022	-9.966
TCGA-AC-A3HN-01	5.884	-0.2498	4.91	0.1903	5.951	5.328	5.332	-1.149	4.07
TCGA-B3-4103-01	5.884	-0.8863	3.036	0.9038	5.362	4.37	3.861	-0.5756	-9.966
TCGA-06-0190-02	5.883	-0.6643	5.294	0.7146	5.228	0.8082	5.195	1.085	5.807
TCGA-LN-A4MQ-01	5.881	0.4447	-9.966	1.19	5.298	0.5666	5.685	1.138	6.169
TCGA-BH-A1FU-01	5.88	-0.1665	2.899	0.8647	6.658	6.565	5.801	1.008	1.872
GTEX-13D11-0626-SM-5LZYY	5.879	-1.732	4.24	0.7146	4.48	-9.966	4.188	-0.1828	4.192
TARGET-50-PAJNZU-01	5.879	-3.308	2.637	2.89	6.555	6.231	6.362	5.386	0.4447
TCGA-85-7698-01	5.875	0.3231	4.765	0.1776	6.5	5.677	5.497	1.46	-9.966
TCGA-56-8201-01	5.873	-0.7346	3.615	-0.013	6.156	5.806	4.816	0.7493	-9.966
GTEX-WYVS-1126-SM-4SOJX	5.872	-0.4719	5.402	0.1257	4.551	1.614	4.223	-9.966	3.668
TCGA-DU-6402-01	5.872	-0.8599	1.368	-0.9686	5.854	4.862	4.589	1.177	-9.966
TCGA-44-6774-01	5.872	-1.685	4.45	-2.388	5.941	5.189	4.418	-0.1031	-9.966
TCGA-D8-A1JL-01	5.87	-0.3201	-9.966	-0.0425	6.63	5.949	5.007	1.884	-0.5756
TCGA-VR-A8Q7-01	5.87	-0.6193	4.033	1.071	5.51	1.252	5.319	0.8726	6.459
TCGA-DX-AB2L-01	5.869	-1.884	7.02	-1.181	5.44	4.692	4.259	-0.7588	1.029
TCGA-SN-A84W-01	5.868	-0.9686	4.471	2.316	6.347	5.697	5.826	2.105	3.669
TARGET-50-PAJMEL-01	5.864	-2.053	5.22	1.732	6.39	6.493	6.332	4.818	0.1519
GTEX-UPIC-1526-SM-4IHLU	5.864	-2.178	5.903	1.872	5.257	-9.966	4.792	-9.966	5.239
TCGA-B3-8121-01	5.864	-2.466	-5.574	-0.0277	5.446	4.411	4.052	-9.966	-9.966
TCGA-HD-8634-01	5.863	0.03	-9.966	-0.8084	5.012	4.578	4.082	0.5271	-9.966
TCGA-A5-A7WJ-01	5.862	-2.315	4.052	2.755	7.307	6.938	6.815	3.025	1.39
TCGA-CN-A6V7-01	5.861	0.3685	5.297	0.7916	5.972	5.763	5.918	1.385	1.656
TCGA-CV-7433-01	5.86	0.7321	-9.966	-1.595	5.586	5.518	4.38	-1.552	-9.966
GTEX-ZQG8-2426-SM-57WEE	5.86	-2.635	6.07	0.03	4.411	2.764	4.456	-0.9132	3.799
TCGA-58-8392-01	5.858	0.9419	3.844	0.8164	6.198	5.703	4.97	1.362	-9.966
TCGA-05-4396-01	5.856	-0.7108	3.234	-0.2845	5.6	5.383	4.871	0.7321	-9.966
TCGA-22-5492-01	5.856	-1.056	-9.966	0.4657	6.026	5.137	4.494	0.0718	-0.2159
TCGA-FD-A3N5-01	5.853	0.7407	4.897	-0.5125	5.482	5.11	4.69	-1.149	4.351
TCGA-GV-A40E-01	5.852	0.7999	7.049	1.546	6.143	6.381	5.146	0.8408	2.101
TCGA-A7-A26G-01	5.852	-0.8863	3.055	-0.6193	6.262	5.57	4.738	1.491	0.4865
TCGA-DX-A1L4-01	5.852	-1.431	3.961	-1.781	5.13	5.261	4.213	-0.0725	-9.966
TCGA-CV-A45R-01	5.851	0.7321	5.759	-0.3566	5.125	4.63	4.078	-1.318	1.258
GTEX-11DXZ-1626-SM-5GIDI	5.851	0.1776	6.407	1.071	4.339	-0.3566	4.321	0.0158	4.659
TCGA-31-1959-01	5.85	0.2998	-9.966	0.8726	5.2	-9.966	5.192	2.488	6.373
GTEX-Z93S-2426-SM-5HL8N	5.85	-0.9971	7.003	-0.394	4.746	3.259	4.349	-9.966	3.798
TCGA-BA-A4II-01	5.849	-0.4921	2.921	-0.9971	6.222	5.5	4.531	-9.966	1.749
TCGA-33-4538-01	5.846	0.2881	4.496	0.8082	7.058	6.272	5.599	-0.1993	2.275
TCGA-ZJ-AAXA-01	5.846	-0.1504	5.668	0.5568	6.284	6.017	5.468	-0.8863	0.605
TCGA-D3-A3CC-06	5.845	0.1124	-0.8339	0.03	5.278	4.892	4.326	0.1124	0.1124
TCGA-N5-A4RT-01	5.845	-0.0725	5.618	3.366	8.031	7.562	6.329	5.202	3.099
TCGA-CV-7263-01	5.845	-0.7346	3.143	-0.7588	6.128	5.732	5.058	0.1124	0.0854
GTEX-ZF2S-1726-SM-57WFT	5.844	-0.7588	5.581	-0.6643	4.795	-9.966	4.241	-9.966	3.705
TCGA-PC-A5DP-01	5.843	1.105	5.449	0.2029	5.459	4.786	4.041	1.642	2.504
TCGA-BQ-5884-01	5.842	0.24	-9.966	-1.392	5.012	4.021	3.534	-0.1504	-0.2845
TCGA-CR-7402-01	5.842	0.0014	-9.966	-0.1993	5.642	4.864	4.616	1.057	0.4552
TCGA-CV-7243-01	5.842	-0.6643	4.468	-1.994	5.979	5.213	4.819	0.537	0.0158
TCGA-D8-A141-01	5.842	-0.9132	4.795	1.036	7.107	5.916	5.422	0.8647	1.665
TCGA-VS-A8EI-01	5.841	-0.3566	6.642	0.9935	5.875	5.361	4.987	0.5763	2.716
TCGA-N1-A6IA-01	5.838	0.9419	4.693	0.1903	6.265	6.174	5.161	1.595	-9.966
GTEX-ZVZO-0426-SM-5HL4Z	5.838	-0.3383	5.119	-0.2845	4.758	1.688	4.786	-0.4325	4.299
GTEX-WHWD-1526-SM-4OORV	5.838	-1.51	5.741	0.688	4.916	1.281	4.32	-9.966	2.546
TCGA-VS-A94Z-01	5.838	-1.732	5.157	1.566	6.451	6.012	5.646	0.5271	2.707
TCGA-IR-A3LC-01	5.837	1.795	6.819	1.209	6.706	6.387	5.746	0.7493	4.69
TCGA-AR-A24T-01	5.837	-0.4921	5.208	-0.1187	7.137	6.487	5.613	-9.966	0.4233
TCGA-CV-A465-01	5.837	-0.8084	4.191	-0.2159	4.966	4.847	3.702	-0.0725	-9.966
TCGA-EW-A1IX-01	5.837	-2.548	-9.966	-0.6643	6.051	5.413	4.478	-9.966	-9.966
TCGA-D8-A1XO-01	5.835	-0.0277	3.103	0.3573	7.161	6.314	5.539	-1.831	-9.966
GTEX-11I78-1326-SM-5PNY9	5.835	-1.214	4.055	1.486	4.92	0.605	4.452	-0.4921	4.533
TCGA-DJ-A2Q9-01	5.834	0.3796	5.435	-0.9971	5.845	5.16	4.631	0.03	0.6332
TCGA-B6-A0RI-01	5.834	-0.1504	2.284	0.6608	5.093	4.622	5.025	1.258	-1.181
TCGA-EW-A1OW-01	5.834	-0.3201	5.712	1.749	7.545	7.116	5.798	2.516	3.792
TCGA-85-7697-01	5.833	-0.8339	4.51	-0.0277	6.124	5.504	5.128	-2.053	1.619
TCGA-DQ-5629-01	5.831	0.1519	-9.966	-0.1031	7.113	6.423	5.724	1.532	-9.966
TCGA-AO-A0JF-01	5.831	-2.388	3.739	0.0718	6.505	5.817	5.448	-9.966	-9.966
TCGA-NK-A5CR-01	5.83	1.46	5.373	1.758	7.081	6.453	5.516	0.8488	1.449
TCGA-B5-A1MW-01	5.83	-0.1665	4.529	1.736	6.8	6.226	6.014	3.067	3.197
TCGA-60-2724-01	5.829	-0.9406	-9.966	-0.4325	6.399	5.919	5.107	-1.552	-0.3022
TCGA-DX-A48J-01	5.828	-1.181	3.507	-0.7834	5.712	5.109	4.311	-9.966	-9.966
TCGA-CC-5260-01	5.827	-1.994	-9.966	-0.5756	6.006	5.3	5.123	2.022	1.008
TCGA-DU-7013-01	5.826	-1.595	-9.966	0.7664	5.651	4.892	4.977	2.488	2.628
TCGA-AC-A2B8-01	5.825	0.3346	2.074	1.637	7.111	6.299	6.146	-0.4921	2.656
GTEX-131XG-2026-SM-5GCN5	5.825	-1.831	2.832	1.679	5.297	-9.966	5.284	-0.5543	5.31
TCGA-ET-A3BV-01	5.824	-0.6193	4.91	-0.5543	5.356	5.193	4.597	-9.966	-9.966
TCGA-DK-AA6R-01	5.823	0.03	4.601	-0.5543	5.872	6.264	5.144	-1.392	0.099
TCGA-VS-A9V3-01	5.822	-0.5332	2.269	0.8488	5.919	5.035	4.787	0.9789	-9.966
TCGA-AR-A24O-01	5.821	-0.2845	4.96	-1.248	6.37	5.544	4.891	-0.5973	2.26
TCGA-BH-A18J-01	5.82	-0.2328	5.845	1.164	8.081	7.401	6.247	0.8082	1.276
TCGA-L5-A4ON-01	5.817	0.2642	-9.966	0.4447	4.602	-0.5756	5.301	-0.394	5.621
TCGA-AR-A2LN-01	5.817	-0.4325	3.388	1.34	5.622	5.476	5.108	-3.047	-9.966
GTEX-145LS-2726-SM-5Q5D8	5.817	-1.994	7.503	0.2998	5.085	3.335	4.884	0.0158	4.81
TCGA-58-8390-01	5.816	-0.394	-9.966	1.633	6.622	5.937	5.215	2.008	-0.0574
TCGA-IB-AAUV-01	5.814	-2.315	6.402	0.4016	5.483	5.27	4.385	-1.781	-9.966
TCGA-07-0249-20	5.813	1.516	4.569	0.0158	5.62	-0.3752	5.28	1.783	5.613
TCGA-FS-A4FB-06	5.813	0.1648	-9.966	0.9935	6.065	5.638	4.648	2.439	1.357
TCGA-22-1000-01	5.813	-0.6873	4.355	0.0854	4.807	5.046	4.53	-0.9971	-9.966
TCGA-X6-A8C5-01	5.813	-9.966	6.994	0.9038	5.302	5.583	4.583	0.0854	2.467
TCGA-C5-A7CL-01	5.812	-0.1828	6.416	1.903	6.613	6.438	5.13	-0.4325	3.312
TCGA-BH-A0BL-01	5.812	-0.4921	5.213	0.5859	6.052	5.64	4.533	1.986	-9.966
TCGA-A2-A0T6-01	5.812	-2.727	3.05	0.058	6.67	5.746	5.027	-1.355	0.2277
TCGA-HD-A633-01	5.811	1.406	4.297	0.044	6.508	6.372	5.465	1.679	-0.3383
TCGA-FU-A23L-01	5.811	0.5763	5.612	1.696	6.543	5.557	5.368	1.556	2.858
TCGA-FS-A1ZB-06	5.811	0.5666	3.851	-0.9971	5.761	5.184	4.456	1.036	-5.574
TCGA-CV-5978-01	5.811	0.4447	4.831	-0.2159	6.369	5.859	4.888	-0.0877	1.516
TCGA-56-8629-01	5.811	-0.0425	-0.0277	1.351	6.163	5.769	4.669	2.211	-9.966
TCGA-79-5596-01	5.81	0.537	-9.966	1.177	6.583	5.741	5.095	2.064	0.7146
TCGA-B0-5701-01	5.81	-0.394	3.452	-0.4921	6.096	5.736	5.659	-9.966	-9.966
TCGA-68-7756-01	5.809	-0.6416	4.741	0.3796	6.214	5.664	5.04	0.8961	2.669
TCGA-UF-A71A-01	5.808	0.03	5.12	0.5271	6.311	5.981	5.463	-0.013	1.864
TCGA-DX-A3U7-01	5.808	-0.8339	5.098	0.6332	5.5	5.555	4.051	1.6	0.688
TCGA-GN-A26A-06	5.807	0.3573	3.43	0.9716	7.003	5.751	5.175	3.057	1.428
TCGA-FD-A3B8-01	5.806	0.7664	-9.966	-0.5543	5.008	4.952	4.388	0.2881	3.703
TCGA-HE-7129-01	5.803	0.03	1.527	-1.51	5.294	4.702	4.405	-1.831	-9.966
TCGA-EK-A2RJ-01	5.802	1.444	5.347	0.5955	5.954	5.809	5.194	0.4233	-9.966
GTEX-PWN1-2026-SM-48TD9	5.802	-0.2498	4.747	1.401	5.048	-9.966	4.765	-0.0425	5.108
TCGA-FD-A3N6-01	5.801	0.5955	4.705	-0.0725	5.718	5.539	4.595	-0.2328	3.741
TCGA-HM-A3JK-01	5.801	-0.3383	7.302	-0.1828	6.33	6.036	5.584	-9.966	1.311
TCGA-BH-A0AV-01	5.8	-2.826	4.764	0.8408	6.797	5.887	4.957	-0.0574	1.66
TCGA-CN-6997-01	5.798	-0.2671	-9.966	0.679	5.949	5.819	5.284	0.3907	1.158
TCGA-66-2788-01	5.798	-0.5756	-9.966	-0.4325	6.312	4.974	4.644	1.476	0.2642
TCGA-BH-A0B3-01	5.797	-1.181	4.129	-0.4131	5.572	4.81	4.471	1.701	-1.026
TCGA-UZ-A9PS-01	5.796	-0.394	5.394	-0.1504	5.133	5.327	4.985	-0.1665	1.368
TCGA-A2-A3KC-01	5.795	-0.9971	4.681	2.39	7.379	7.307	6.444	0.6969	5.223
TCGA-28-5218-01	5.795	-9.966	5.198	1.145	6.368	2.135	6.235	2.642	6.56
TCGA-T3-A92M-01	5.794	0.8488	4.808	1.66	6.352	5.358	5.632	1.036	2.011
GTEX-ZVT3-2826-SM-5GU6A	5.793	-0.7834	8.008	1.444	4.724	-9.966	4.478	-9.966	4.171
TCGA-55-7724-01	5.792	0.9789	4.524	-0.4921	5.865	5.983	4.845	-9.966	-9.966
TCGA-EE-A2GB-06	5.792	0.044	-9.966	0.2762	5.725	5.016	4.515	1.561	-9.966
TCGA-CU-A0YN-01	5.792	-0.1504	4.55	0.6239	5.468	5.791	4.569	-2.245	-9.966
TCGA-X9-A971-01	5.79	-0.8863	4.775	1.614	6.185	5.799	5.32	2.621	-0.2328
GTEX-YJ8A-1726-SM-5P9IQ	5.79	-1.248	5.4	0.9568	4.731	1.252	4.817	-9.966	4.796
TCGA-66-2789-01	5.789	1.196	4.991	0.2154	6.712	5.646	4.915	0.4761	-0.5543
TCGA-EE-A2GD-06	5.787	0.7233	1.99	-0.0574	6.41	6.24	5.071	-0.7588	-9.966
TCGA-86-8074-01	5.787	-0.5543	5.264	0.9038	6.374	6.255	5.527	2.101	3.413
TCGA-EA-A3HQ-01	5.787	-0.5543	3.497	0.4761	6.322	6.018	5.361	1.595	2.208
GTEX-ZYT6-2826-SM-5GICX	5.787	-1.47	7.913	0.1388	4.928	2.365	4.687	-9.966	5.084
TCGA-DX-A48O-01	5.785	-9.966	6.897	0.3231	6.557	6.293	5.086	1.015	-0.2159
TCGA-EE-A29W-06	5.784	0.1903	1.799	1.812	6.745	6.596	5.566	3.136	2.939
TCGA-CV-7248-01	5.784	-0.7108	-9.966	-0.2159	5.903	5.572	5.035	1.092	0.099
TCGA-EW-A1PG-01	5.783	-1.884	5.071	0.1776	6.931	6.165	5.131	1.566	-9.966
TCGA-FS-A1ZD-06	5.783	-2.548	4.489	2.196	7.127	6.872	5.845	2.744	2.053
TCGA-AR-A1AI-01	5.782	0.8726	-9.966	-0.1993	6.774	6.268	5.197	1.537	-9.966
TCGA-56-5897-01	5.782	-0.9686	-9.966	-0.8599	5.588	4.968	4.301	0.4657	-9.966
TCGA-BA-5559-01	5.782	-3.171	-9.966	-0.1665	5.346	4.951	3.985	-1.639	-9.966
TCGA-77-A5G3-01	5.779	0.5568	3.936	1.512	6.189	5.758	4.888	0.6699	1.852
TCGA-VS-A94Y-01	5.779	-2.727	6.518	1.252	7.139	6.089	5.868	2.144	2.39
GTEX-111YS-1826-SM-5GIEP	5.778	0.099	5.46	0.4552	4.834	0.6332	4.457	0.517	4.304
GTEX-ZAB5-1426-SM-5HL9D	5.778	-2.053	5.59	0.8805	4.664	-9.966	4.498	-9.966	4.044
TCGA-78-7150-01	5.778	-2.114	3.036	0.3115	6.407	6.091	4.658	2.131	-9.966
TCGA-AG-3732-11	5.776	-9.966	4.236	-0.4921	5.574	4.907	4.395	-1.149	-9.966
TCGA-CN-A49B-01	5.775	-0.6873	5.784	0.5666	6.579	6.74	5.41	0.5568	1.824
TCGA-27-2523-01	5.774	-1.552	3.577	0.7916	6.093	-0.1828	5.749	2.747	5.704
TCGA-56-8504-01	5.774	-2.053	-9.966	0.4657	6.519	6.112	5.232	2.531	1.9
TCGA-06-0152-02	5.773	-0.0574	-4.293	0.9935	5.192	0.6145	4.94	3.239	5.298
TCGA-BR-8367-01	5.773	-0.4719	-9.966	-0.0425	5.082	3.578	4.743	-1.685	2.144
TCGA-HE-7130-01	5.771	-2.245	-9.966	0.6699	5.577	4.257	4.165	-0.9406	0.3115
TCGA-HQ-A5NE-01	5.771	-9.966	3.988	0.1903	6.413	5.347	4.996	0.8246	-9.966
TCGA-DR-A0ZL-01	5.769	-0.4521	6.281	1.723	6.899	6.805	5.481	1.406	2.183
TCGA-AR-A255-01	5.769	-0.8084	1.692	1.439	7.652	7.219	6.662	1.705	2.77
TCGA-BA-A8YP-01	5.768	0.7058	1.949	1.138	6.708	5.076	5.497	1.832	1.522
TCGA-68-7757-01	5.768	0.058	5.918	0.0854	6.173	5.62	5.234	0.346	-0.4131
TCGA-CR-7393-01	5.768	-0.4325	-9.966	-4.035	4.793	4.448	3.877	-9.966	-9.966
TCGA-UZ-A9PR-01	5.768	-3.047	5.538	1.029	5.326	5.206	4.791	-9.966	0.8726
TCGA-IG-A5B8-01	5.767	1.158	4.089	-0.4521	5.014	-0.8863	5.053	-1.283	5.933
TCGA-S9-A89V-01	5.767	-1.056	-9.966	0.5271	5.126	3.915	4.581	-1.214	1.585
TCGA-EE-A17Z-06	5.767	-2.178	4.032	0.7407	6.917	6.287	5.644	3.303	2.305
TCGA-BA-5557-01	5.766	0.6608	-9.966	-3.458	4.218	4.008	3.072	-0.1031	-0.4325
TCGA-Q1-A73R-01	5.766	0.4125	4.586	2.254	6.307	5.959	5.652	3.263	1.476
TCGA-66-2759-01	5.766	-0.2845	-9.966	-0.1828	6.913	6.146	5.41	1.227	-0.4325
TCGA-CN-A63V-01	5.766	-0.5756	5.265	-0.4719	5.486	5.165	4.579	-1.831	1.779
TCGA-P3-A6T5-01	5.766	-1.248	5.865	0.6517	5.787	5.201	5.089	0.24	1.39
TCGA-B9-5156-01	5.765	-0.1665	-9.966	-1.47	5.225	4.841	3.943	-0.5332	-0.4921
TCGA-EA-A5FO-01	5.765	-1.355	6.225	0.6145	6.35	5.901	4.936	2.651	-9.966
TCGA-D8-A27T-01	5.763	-0.9406	4.424	0.3907	6.787	6.006	5.648	1.183	-0.1504
TCGA-E9-A226-01	5.763	-9.966	6.273	0.1648	7.307	7.212	5.805	-9.966	3.205
TCGA-34-8456-01	5.762	-0.1504	1.476	1.057	6.038	5.465	4.812	1.177	-9.966
TCGA-BA-A6DJ-01	5.76	-0.5973	5.088	0.6239	5.824	6.078	4.942	-0.1993	-9.966
TCGA-D8-A1J9-01	5.759	0.2881	3.053	-0.3566	7.022	6.149	5.659	0.7321	0.7407
TCGA-CN-5365-01	5.759	-0.5973	5.437	-1.149	5.965	5.42	4.341	-0.7834	-0.8599
TCGA-CQ-5331-01	5.759	-0.5973	-9.966	-1.086	5.595	5.32	4.321	0.3346	-9.966
TCGA-VS-A957-01	5.759	-9.966	5.874	1.705	6.479	5.765	5.393	2.217	1.605
TCGA-33-AAS8-01	5.758	1.844	5.226	2.151	6.76	6.123	5.668	2.59	2.757
TCGA-B1-A657-01	5.758	0.0718	7.166	0.2277	5.085	5.089	4.383	1.252	-9.966
TCGA-06-2559-01	5.758	-2.114	4.584	2.008	5.459	2.993	5.635	2.536	5.791
TCGA-F7-A61S-01	5.757	-0.5125	5.81	-0.3022	6.192	6.223	5.004	1.132	-9.966
TCGA-A7-A6VV-01	5.757	-1.056	2.899	0.7664	5.898	5.312	5.313	1.252	0.3685
TCGA-A2-A04W-01	5.756	-0.0725	6.291	-1.283	6.258	5.562	5.036	-9.966	1.39
TCGA-VS-A8EH-01	5.756	-0.6643	5.948	1.239	5.743	5.581	5.086	-0.1828	2.573
TCGA-AO-A12C-01	5.755	-1.355	3.918	0.0854	6.737	5.733	5.777	-0.8084	-9.966
TCGA-66-2753-01	5.754	-0.5332	-9.966	-0.5332	6.866	5.606	5.063	-1.639	-9.966
TARGET-50-CAAAAR-01	5.754	-1.392	3.874	2.081	6.366	6.433	6.614	4.309	1.071
TCGA-A2-A1FZ-01	5.754	-2.053	3.795	1.008	6.824	5.928	5.641	-9.966	-9.966
TCGA-Y8-A895-01	5.753	0.7321	7.505	0.2762	4.23	4.572	4.053	-9.966	3.321
TCGA-IG-A4P3-01	5.753	-0.3022	3.25	0.9493	3.549	-0.1187	5.601	0.679	6.783
TCGA-BG-A2AD-11	5.753	-9.966	6.568	-3.171	5.45	5.596	4.706	-1.056	-9.966
TCGA-CV-A6JD-01	5.751	0.7916	7.53	-0.6873	6.095	6.278	5.05	0.2762	0.9789
TCGA-D8-A27P-01	5.751	-0.6416	4.088	0.24	6.471	5.408	5.574	-1.47	1.964
TCGA-K4-A3WV-01	5.75	0.8082	6.136	1.561	6.068	5.924	4.99	2.536	-9.966
GTEX-YJ8A-1426-SM-5PNV7	5.748	-1.392	4.68	0.9115	4.407	-9.966	4.532	-1.283	4.069
TCGA-BH-A1ET-01	5.747	-1.248	5.248	-0.4325	6.496	5.876	5.553	-9.966	1.982
TCGA-B9-4117-01	5.746	-0.1504	-9.966	0.0854	4.816	3.866	3.653	-9.966	-9.966
TCGA-GC-A3I6-01	5.746	-0.4521	5.411	0.1388	5.158	4.715	4.694	-0.2159	4.384
TCGA-22-5491-01	5.744	0.3685	-9.966	-0.0425	6.784	5.818	5.369	-0.6193	-9.966
TCGA-A8-A07E-01	5.744	0.1257	3.914	0.6517	7.064	6.561	5.57	0.0854	0.605
TCGA-D8-A27G-01	5.744	-0.5756	3.691	1.138	6.538	5.857	5.646	2.488	1.758
GTEX-111CU-1226-SM-5EGIN	5.744	-9.966	5.548	1.151	4.706	-9.966	4.865	-9.966	4.083
TCGA-MA-AA41-01	5.743	-0.8339	5.687	1.233	6.275	5.954	5.315	0.7916	1.276
TCGA-D8-A146-01	5.743	-2.388	4.698	0.1519	6.645	5.521	5.465	-0.3201	1.787
TCGA-CN-A6V3-01	5.742	0.4865	-9.966	-0.4921	5.157	4.816	5.055	-0.0425	-9.966
TCGA-A7-A4SE-01	5.742	-0.5973	4.534	2.975	7.04	6.506	5.652	-9.966	1.719
TCGA-VS-A959-01	5.742	-0.9132	5.401	1.385	5.918	5.807	4.919	1.158	1.986
TCGA-77-7335-01	5.742	-1.552	7.096	-2.727	5.994	6.206	4.569	-0.9971	-9.966
TCGA-C4-A0F1-01	5.74	0.0854	4.064	-1.355	5.982	5.53	4.621	-1.938	-9.966
TCGA-CQ-6219-01	5.74	-1.51	5.444	-0.4521	5.747	5.883	4.738	-0.3566	0.8082
TCGA-DK-A1A5-01	5.739	-0.2498	5.533	-0.1031	6.61	6.771	5.514	-1.639	1.288
TCGA-S9-A7IS-01	5.739	-0.5756	5.6	2.488	5.994	5.751	5.697	3.615	2.649
GTEX-11EQ9-1426-SM-5987G	5.739	-0.5973	4.648	2.354	4.291	2.095	4.68	-9.966	4.618
GTEX-13S86-0726-SM-5Q5DH	5.739	-2.114	5.486	-0.1993	4.661	2.325	4.746	-9.966	4.206
TCGA-CQ-7071-01	5.738	0.1776	3.608	-0.8863	5.808	5.608	4.467	-0.5332	-9.966
TCGA-98-A53J-01	5.737	0.4125	5.949	1.071	6.551	5.816	4.949	1.551	1.317
TCGA-A4-7734-01	5.737	-0.7108	2.632	-0.5973	5.275	4.812	5.155	-9.966	0.2277
TCGA-HZ-7922-01	5.737	-2.245	2.588	-0.2498	5.693	4.619	5.142	0.3685	-9.966
TCGA-E2-A10F-01	5.737	-2.315	4.16	0.8246	7.129	6.317	5.918	0.0014	-9.966
TCGA-98-A53A-01	5.736	0.0718	4.486	3.303	7.54	6.501	5.783	3.741	2.63
TCGA-G4-6302-01	5.736	-1.685	5.354	-0.9406	5.531	5.139	4.492	-9.966	-9.966
TCGA-77-8154-01	5.735	0.3685	3.951	1.465	6.678	6.47	5.43	-9.966	1.993
TCGA-ZF-AA4N-01	5.733	0.6699	6.355	0.3231	6.355	5.694	5.191	0.24	-9.966
TCGA-LN-A5U5-01	5.733	-1.283	2.478	0.6425	5.668	2.964	5.762	2.118	6.112
TCGA-FP-7829-11	5.733	-2.466	-9.966	-1.938	3.286	-9.966	3.638	-9.966	4.168
TCGA-EW-A1PC-01	5.733	-3.308	4.154	2.365	7.834	7.027	6.531	2	1.071
TCGA-77-7138-01	5.732	-1.552	5.601	0.688	6.61	6.558	5.592	2.428	2.878
TCGA-JW-A5VI-01	5.732	-2.053	5.314	1.245	6.252	5.697	4.628	1.719	1.799
TCGA-EW-A1J2-01	5.731	-1.884	4.692	1.112	6.529	6.085	5.459	-9.966	1.202
TCGA-NK-A5CX-01	5.73	-0.3566	5.943	1.008	6.209	5.98	5.178	1.66	1.647
TCGA-JY-A6FH-01	5.73	-1.214	-9.966	0.9115	5.594	2.644	5.395	2.409	4.203
TCGA-LN-A4A3-01	5.729	-0.3022	-9.966	-0.0277	4.777	0.7146	5.441	0.9568	6.108
TCGA-L5-A88W-01	5.728	1.043	-9.966	-0.9406	5.182	3.739	5.174	0.3907	4.331
TCGA-AC-A23G-01	5.728	-2.053	5.253	-0.2845	5.903	4.881	5.349	-0.5125	5.015
TCGA-22-1012-01	5.727	1.907	4.802	0.5069	6.894	5.88	5.456	-0.0277	0.1124
GTEX-XAJ8-0726-SM-47JY5	5.727	-1.994	5.485	0.5763	4.777	0.8408	4.692	-9.966	5.025
TCGA-4J-AA1J-01	5.727	-2.635	4.899	1.036	6.502	5.498	5.623	1.434	1.171
TCGA-F7-A622-01	5.726	-0.1504	7.22	-0.1993	6.594	6.674	5.66	1.245	0.2881
TCGA-EI-6882-01	5.726	-0.6416	-9.966	0.4016	6.643	6.769	4.875	-0.0425	-9.966
TCGA-P4-A5E7-01	5.726	-1.117	5.602	0.605	5.543	4.949	4.086	0.1388	-9.966
GTEX-T5JC-1226-SM-4DM7C	5.726	-1.392	7.867	-0.3566	4.566	3.297	4.124	-9.966	4.566
TCGA-A4-8515-01	5.724	0.4125	4.448	-1.392	5.459	4.757	4.607	0.099	-0.0574
TCGA-CN-6012-01	5.724	-0.4521	-9.966	0.0014	5.96	4.134	4.138	-9.966	-9.966
TCGA-AR-A24L-01	5.724	-0.9406	4.907	-0.0877	6.808	5.765	5.258	0.3573	1.078
TCGA-76-4931-01	5.724	-1.181	4.157	1.884	5.567	0.0854	5.755	3.603	6.103
TCGA-CV-7411-01	5.723	0.8883	3.405	-5.012	4.091	4.175	3.213	-9.966	-9.966
TCGA-43-8116-01	5.723	-1.639	0.7493	1.252	6.452	6.664	5.142	1.532	0.9115
TCGA-MO-A47P-01	5.722	-0.0277	4.47	-1.086	4.843	4.333	3.609	-1.781	-0.0574
TCGA-IQ-A61G-01	5.721	1.753	7.499	0.6699	6.762	7.211	5.708	2.251	-9.966
TCGA-XN-A8T3-01	5.721	-0.5125	6.353	0.7321	5.56	5.085	4.625	1.151	0.4865
TCGA-HD-A6HZ-01	5.721	-1.392	3.308	0.679	5.622	5.266	4.808	-1.214	-9.966
TCGA-CR-7385-01	5.721	-1.938	-9.966	0.5568	5.952	4.555	4.867	-9.966	0.8327
TCGA-EO-A3AU-01	5.72	0.1519	4.741	0.7579	6.29	6.199	5.019	1.071	-9.966
TCGA-DK-A3WX-01	5.719	0.03	4.735	1.085	5.833	6.094	4.791	-0.1031	0.2998
TCGA-CX-7086-01	5.719	-0.5756	-9.966	-0.1187	5.97	5.224	4.654	-0.0574	1.486
TCGA-C8-A132-01	5.719	-9.966	2.625	0.1124	6.45	5.22	4.751	0.688	0.3685
TCGA-66-2737-01	5.718	-0.7834	-9.966	-0.0725	6.616	6.251	5.223	-1.181	0.6332
TCGA-85-8052-01	5.718	-1.086	2.936	1.281	6.214	6.417	5.012	-9.966	-9.966
TCGA-2F-A9KT-01	5.717	-0.6416	7.179	1.036	6.375	5.851	5.671	-9.966	3.243
TCGA-FT-A3EE-01	5.716	-0.5332	4.306	-0.0425	6.535	6.452	5.093	0.2881	-0.6416
TCGA-29-A5NZ-01	5.716	-0.5756	-9.966	2.37	6.606	2.642	6.403	3.521	5.916
TCGA-E9-A1R3-01	5.716	-1.248	4.374	-0.2498	7.094	6.511	5.657	-1.831	-9.966
TCGA-22-4601-01	5.715	1.098	-9.966	1.379	5.389	5.326	4.166	-0.0877	1.008
TCGA-ZF-AA53-01	5.715	0.2881	6.159	-0.9971	5.989	4.934	4.916	1.27	3.903
TCGA-DX-A3UA-01	5.715	-0.3383	6.262	-0.9132	6.227	5.735	4.539	-9.966	0.4447
TCGA-BH-A18M-01	5.712	-0.2671	3.977	0.6517	7.18	6.332	5.643	-1.431	2.242
TCGA-D8-A27K-01	5.712	-1.595	4.213	0.3685	6.51	6.261	6.125	-1.639	2.83
TCGA-2Z-A9JS-01	5.712	-3.171	5.04	0.6608	5.375	4.622	4.912	-1.831	-9.966
TCGA-D8-A1XA-01	5.711	0.517	-9.966	1.043	6.195	5.05	4.647	-1.149	0.9268
TCGA-ZH-A8Y4-01	5.711	-0.8863	3.086	0.4761	6.915	5.823	5.336	0.4447	1.412
GTEX-13PVR-1726-SM-5Q5EC	5.711	-1.248	5.544	0.3573	5.018	-9.966	4.184	-0.9132	4.31
GTEX-1399S-2226-SM-5IFEW	5.709	-9.966	4.772	2.015	5.261	1.132	4.85	-9.966	3.997
TCGA-BH-A1EU-01	5.708	-0.0277	4.478	0.7146	6.346	5.899	5.282	-9.966	1.941
TCGA-L5-A8NL-01	5.708	-0.4325	-0.8599	-0.2498	4.886	-0.5543	5.424	1.064	6.966
GTEX-13111-1926-SM-5GCOL	5.707	-0.8084	4.898	1.762	4.667	1.537	4.213	-9.966	3.684
TCGA-CN-6994-01	5.707	-1.086	-9.966	-1.086	4.82	4.758	3.972	-1.056	0.4016
GTEX-ZP4G-1526-SM-57WE5	5.707	-2.178	5.871	1.491	5.224	-9.966	4.406	-9.966	2.473
TCGA-B9-A8YH-01	5.706	-1.026	5.879	0.9115	5.46	4.385	4.663	-0.8339	0.8805
TCGA-AX-A0IZ-11	5.706	-9.966	6.368	-9.966	6.161	5.905	4.788	-9.966	-9.966
GTEX-ZF2S-1126-SM-4WKHH	5.706	-9.966	5.435	-0.1345	4.668	-9.966	3.929	-9.966	4.253
TCGA-4E-A92E-01	5.705	-0.4719	-9.966	1.888	6.643	6.098	6.151	3.027	1.043
TCGA-EO-A3AS-01	5.704	0.2154	4.782	0.8568	5.911	5.844	5.245	2.05	0.9038
TCGA-Q1-A73Q-01	5.702	-0.5543	6.097	1.926	7.228	6.965	5.822	2.723	3.323
GTEX-13VXT-2026-SM-5L3EW	5.702	-1.639	5.781	1.59	5.031	2.592	4.295	-9.966	4.141
TCGA-L5-A891-01	5.701	-0.2159	-9.966	0.1903	6.336	4.675	6.056	0.9268	4.372
TCGA-A8-A08O-01	5.7	0.8327	4.897	1.305	6.895	6.324	5.883	-0.0725	-9.966
GTEX-T6MO-0826-SM-4DM51	5.7	0.434	5.085	1.158	4.605	2.496	4.299	-9.966	3.222
TCGA-39-5027-01	5.699	-0.7108	6.884	0.537	6.597	6.592	5.385	-1.47	2.189
TCGA-CR-7399-01	5.699	-1.884	2.447	-0.6873	6.677	5.207	5.083	-0.2671	-9.966
TCGA-HZ-8002-01	5.699	-2.466	4.699	-0.013	6.066	4.873	5.052	0.3346	-9.966
TCGA-UC-A7PG-01	5.697	-0.3566	4.274	1.264	5.284	5.282	5.172	-0.1504	-0.4131
GTEX-113JC-2226-SM-5EGJG	5.697	-0.5543	6.695	0.688	4.671	4.223	4.857	0.099	4.751
TCGA-BH-A0H3-01	5.697	-1.117	4.447	0.9343	7.088	6.65	6.029	0.537	-9.966
TCGA-IQ-A6SG-01	5.696	0.8805	4.905	0.7058	5.838	5.68	5.336	1.118	0.6608
TCGA-FD-A62S-01	5.695	-0.0277	1.779	-0.2328	5.759	5.607	4.381	-9.966	-9.966
GTEX-11TT1-1426-SM-5EGIA	5.694	0.4761	3.326	0.7233	4.85	-9.966	4.454	0.537	4.577
TCGA-DK-A2HX-01	5.694	-0.0425	6.14	-0.5332	5.292	5.213	4.439	-1.685	-9.966
TCGA-B3-3925-01	5.694	-2.245	2.189	0.8961	5.919	4.418	3.799	-0.5543	-9.966
TCGA-C8-A273-01	5.693	0.3346	4.905	0.1519	6.648	5.826	5.447	-0.5332	-9.966
TCGA-KB-A93J-01	5.692	-0.3383	3.865	0.044	4.42	0.8082	4.811	1.423	5.774
TCGA-A8-A093-01	5.691	0.1257	4.703	0.5568	7.135	6.628	6.495	0.1124	4.48
TCGA-LN-A4A1-01	5.69	0.2029	-9.966	-0.3566	4.464	-0.8599	4.906	0.9191	5.842
TCGA-58-8393-01	5.69	0.0158	-9.966	1.566	7.164	6.163	5.785	0.24	-9.966
GTEX-13U4I-1226-SM-5LU5M	5.69	-0.3201	6.455	0.2522	5.111	-9.966	4.057	-9.966	4.73
TCGA-VS-A953-01	5.688	-0.4521	6.069	0.6969	5.874	6.01	5.436	0.099	2.263
TCGA-XF-A9SY-01	5.688	-0.4921	3.109	0.6332	6.344	5.545	5.229	1.264	1.288
TCGA-CN-6019-01	5.688	-1.056	3.634	-0.8084	5.796	5.033	4.405	0.0854	-1.47
TCGA-22-5485-01	5.687	0.7321	-9.966	0.8961	7.174	6.339	5.755	1.532	-0.4521
TCGA-E2-A10B-01	5.687	-0.3383	3.692	0.7748	7.474	5.773	5.484	-2.053	1.209
TCGA-18-3414-01	5.686	0.1776	3.941	0.0718	6.86	5.851	5.102	0.1388	-9.966
TCGA-46-6026-01	5.682	1.74	5.465	1.401	6.031	6.001	5.071	1.915	0.7493
TCGA-C5-A3HL-01	5.681	-0.6643	4.948	-0.5973	5.937	5.391	4.692	0.9038	-9.966
TCGA-AR-A2LR-01	5.681	-1.431	2.592	2.193	7.118	5.935	6.156	3.134	3.964
TCGA-55-8204-01	5.681	-2.826	5.211	0.6969	5.819	6.117	4.758	0.2998	0.537
TCGA-UZ-A9PU-01	5.68	0.6517	5.772	0.099	5.035	4.987	4.33	-1.732	-0.3566
TCGA-BP-4770-01	5.68	-1.056	7.284	-0.7588	6.151	5.906	4.636	-1.732	1.6
TCGA-BH-A0BS-01	5.679	-0.1504	3.329	-1.086	7.206	6.162	5.617	-9.966	1.227
TCGA-98-A539-01	5.679	-0.6873	4.861	1.357	5.8	5.194	4.549	-9.966	2.025
TCGA-BH-A0B7-01	5.678	-0.394	4.638	0.7916	7.097	6.286	5.754	1.151	-9.966
TCGA-43-8115-01	5.678	-0.9971	-9.966	1.581	5.618	5.548	4.511	1.774	1.679
TCGA-D1-A3DA-01	5.678	-1.086	6.442	2.824	7.529	7.044	6.356	3.881	4.572
TCGA-BQ-7051-01	5.677	-0.4521	-9.966	-1.51	5.492	4.735	4.321	-0.5543	-0.9132
TARGET-50-PAJMSE-01	5.677	-2.388	4.42	2.674	6.62	6.526	6.718	5.782	1.322
TCGA-ZF-AA58-01	5.676	0.1124	6.71	0.7058	6.229	6.469	5.386	2.334	2.473
TCGA-XU-A92Z-01	5.676	-0.2159	4.863	0.9568	6.301	5.878	5.692	0.8164	-9.966
GTEX-V955-1626-SM-4JBHJ	5.676	-9.966	5.826	1.015	5.076	2.257	4.381	-0.5125	3.819
GTEX-13FH7-1526-SM-5J2N6	5.675	-0.4521	5.136	0.7916	4.938	-9.966	4.426	-0.8084	4.654
TCGA-VR-A8EP-01	5.673	1.816	-9.966	1.481	5.205	0.7579	5.076	1.444	6.076
TCGA-18-3411-01	5.673	0.8568	1.311	0.099	7.002	6.451	5.494	0.6608	-0.5756
TCGA-HM-A4S6-01	5.673	0.4865	-0.5756	0.058	5.691	5.756	4.443	0.5271	2.121
TCGA-XV-A9W5-01	5.673	-0.9971	5.732	1.158	6.205	4.943	5.233	-1.248	1.758
TCGA-DK-A3IT-01	5.673	-2.245	5.911	0.547	6.142	6.338	5.674	-0.3383	5.871
TCGA-P3-A5Q6-01	5.672	0.1388	6.355	-0.3383	6.402	6.023	5.118	-0.8084	-9.966
TCGA-QK-AA3K-01	5.671	-0.6643	6.472	1.105	6.469	5.025	5.497	1.085	5.027
TCGA-C5-A8YR-01	5.67	0.9862	6.678	2.447	6.789	6.436	5.891	3.922	2.214
TCGA-AR-A24W-01	5.67	0.8961	3.29	0.1519	6.676	5.898	5.258	-0.5332	2.074
TCGA-A8-A09V-01	5.67	-0.7588	3.657	2.177	6.898	5.73	6.019	2.025	3.034
TCGA-HR-A2OG-06	5.669	-0.1345	3.59	-0.0425	5.658	5.523	4.653	-1.884	0.1903
TCGA-EW-A1P8-01	5.668	0.1519	4.182	1.196	7.224	6.492	5.665	2.245	3.208
TCGA-NC-A5HD-01	5.667	-0.6873	5.976	2.714	7.395	7.077	5.809	1.036	3.82
TCGA-77-8128-01	5.666	0.434	4.841	1.379	6.251	6.316	4.917	1.064	-9.966
TCGA-Z6-AAPN-01	5.665	0.6425	6.07	-0.0725	5.381	-0.1993	5.061	1.6	6.024
TCGA-94-A4VJ-01	5.665	-0.394	3.91	1.098	5.856	5.7	4.653	-1.056	0.4233
TCGA-HZ-A77P-01	5.665	-1.117	5.73	0.1903	4.851	4.851	4.655	0.6517	1.581
GTEX-QLQ7-1126-SM-4R1KN	5.665	-1.781	4.138	1.368	5.545	-9.966	4.683	-9.966	4.621
TCGA-CV-6933-01	5.664	-0.3022	3.935	-0.4719	5.599	5.333	4.596	-0.3566	-0.9132
TCGA-EE-A2M7-06	5.664	-0.9971	4.555	0.1648	7.135	6.723	5.965	0.0854	-3.308
TCGA-ZF-A9RE-01	5.664	-1.214	2.473	1.566	6.059	5.796	5.617	-0.3022	1.633
GTEX-WY7C-1926-SM-4ONCI	5.663	-0.4921	5.878	0.7748	4.818	0.044	4.298	-9.966	4.347
TCGA-CN-4739-01	5.663	-0.7588	-9.966	0.3907	5.493	5.189	4.193	-0.0277	0.9568
GTEX-S4UY-1226-SM-4AD51	5.662	0.0014	5.547	1.628	4.895	-9.966	4.741	-9.966	5.173
TCGA-C5-A1MK-01	5.662	0.0014	4.561	0.7664	6.645	5.797	5.116	1.486	0.8726
TCGA-A5-A3LO-01	5.662	-1.056	5.863	1.848	6.695	6.27	5.946	2.705	3.25
TCGA-DV-5567-01	5.662	-1.149	-9.966	-0.3022	5.548	5.013	4.889	-0.1665	-9.966
TCGA-GM-A2DH-01	5.662	-1.214	2.846	1.949	7.25	6.558	5.766	1.556	0.4233
TCGA-SX-A71S-01	5.662	-1.51	4.468	0.8488	5.17	5.091	4.839	-0.4719	1.824
TCGA-98-A53B-01	5.662	-1.595	3.065	1.975	5.788	5.286	4.48	-0.9971	0.9343
TCGA-AF-2692-11	5.662	-2.826	2.521	-0.5973	5.006	4.891	4.62	-0.9971	-9.966
GTEX-YECK-2826-SM-5IFHF	5.661	-1.732	7.418	0.2998	4.714	0.8647	4.117	-9.966	4.337
TCGA-AJ-A23N-01	5.66	0.1903	5.133	2.131	6.659	5.85	5.329	2.72	4.548
TCGA-NC-A5HT-01	5.66	0.058	5.995	2.151	6.896	6.495	5.609	2.26	2.911
TCGA-AR-A24P-01	5.66	-2.932	4.453	0.5955	7.199	6.259	5.713	-0.8599	0.4447
TCGA-C8-A12O-01	5.659	-0.5756	2.561	0.2522	6.428	5.5	4.491	-9.966	-9.966
TCGA-D8-A27L-01	5.658	-0.7346	3.306	0.3907	6.171	5.315	5.259	0.4233	2.015
TCGA-60-2703-01	5.657	-0.8339	3.065	0.6239	7.024	6.605	4.64	1.779	0.1519
TCGA-63-A5MJ-01	5.656	-0.2845	4.587	1.824	7.296	7.018	5.976	2.559	-0.3383
TCGA-A7-A0DA-01	5.656	-2.053	5.851	0.6332	6.847	6.152	5.609	-0.6873	3.768
TCGA-RD-A8NB-01	5.655	-0.2498	3.326	-0.7834	5.014	-0.4521	5.331	-0.0277	6.409
TCGA-WE-A8ZY-06	5.655	-1.392	-9.966	1.679	6.634	5.697	5.904	0.8726	1.956
TCGA-O2-A5IB-01	5.654	-0.0425	-9.966	2.86	7.256	6.455	5.937	3.141	3.694
TCGA-A8-A0AB-01	5.653	-2.932	3.032	2.081	7.921	6.431	6.813	1.537	3.794
TCGA-A8-A07L-01	5.652	0.3573	3.45	1.766	8.477	7.118	6.698	2.46	0.2029
TCGA-77-A5GF-01	5.652	-9.966	5.001	0.8408	6.604	6.287	5.32	0.7058	-9.966
TCGA-E2-A15R-01	5.651	0.9935	2.272	1.071	6.927	6.089	5.739	0.058	1.379
GTEX-ZTTD-0626-SM-4YCCY	5.649	1.057	4.78	-1.248	5.421	2.039	4.666	-9.966	4.513
TCGA-DQ-7591-01	5.649	-0.5973	5.339	0.7916	6.005	5.442	4.926	0.4233	2.753
GTEX-12BJ1-2026-SM-5FQUH	5.649	-0.9406	4.294	0.1519	4.604	0.5069	4.79	-9.966	3.938
TARGET-50-PAECJB-01	5.649	-1.831	5.24	3.471	7.204	7.148	7.051	6.014	2.354
TCGA-HU-A4G3-11	5.649	-1.884	-9.966	-0.5125	4.737	0.605	3.851	-0.6643	5.147
GTEX-131YS-2926-SM-5EGKI	5.649	-2.466	7.138	0.434	4.463	3.191	4.323	-9.966	4.165
TCGA-BR-A4IU-01	5.648	-0.2328	3.414	-0.0574	4.838	-2.388	4.81	-0.6643	5.462
TCGA-21-1077-01	5.647	0.8805	2.816	0.9268	6.627	6.19	5.594	1.015	1.808
TCGA-LN-A49P-01	5.647	0.5271	-9.966	0.4657	4.168	0.0014	4.636	0.2998	5.824
TCGA-CV-6951-01	5.647	-0.8084	5.249	-0.8599	5.831	5.709	5.066	-1.51	1.714
GTEX-U3ZN-1826-SM-4DXUY	5.647	-9.966	4.567	0.03	4.696	-9.966	3.788	0.2277	4.495
TCGA-IQ-7632-01	5.646	0.8082	4.392	-1.47	5.4	5.371	4.444	-9.966	-9.966
GTEX-Y114-1626-SM-4TT7I	5.644	-0.7108	4.397	1.05	4.625	3.077	4.323	0.24	3.387
TCGA-25-1626-01	5.643	-2.932	-9.966	0.8488	5.026	-0.4719	4.599	0.7999	5.313
TCGA-CV-A45Z-01	5.642	0.7916	4.719	-0.1665	5.915	5.687	4.552	-9.966	0.517
TCGA-66-2791-01	5.642	-0.2498	-9.966	0.3231	6.39	5.758	4.848	1.465	-0.6873
TCGA-CV-7429-01	5.641	-0.0574	4.01	1.252	7.248	6.587	5.651	3.216	1.975
TCGA-68-7755-01	5.641	-0.7108	-9.966	0.2277	6.249	5.22	4.957	1.264	2.585
TCGA-VR-A8EY-01	5.64	0.8961	-9.966	-1.181	5.864	3.642	5.776	-0.4921	5.39
TCGA-A4-8630-01	5.64	-0.4131	4.286	-0.1665	5.015	4.44	4.058	-0.4921	-9.966
TCGA-TS-A7P3-01	5.639	-0.394	5.839	0.1648	5.678	5.845	5.06	0.4967	-9.966
TCGA-E9-A1NH-01	5.639	-1.685	5.421	0.9268	7.178	6.687	5.769	-1.181	-9.966
TCGA-32-2632-01	5.638	0.2154	2.93	5.265	10.42	6.524	10.29	6.514	10.31
TCGA-06-0211-01	5.637	-0.6304	-0.482	0.3796	5.082	0.8805	5.189	2.305	5.565
GTEX-13CF3-1326-SM-5LZXZ	5.637	-9.966	5.159	-0.013	4.822	0.5859	4.624	-9.966	4.392
TCGA-VS-A950-01	5.636	-0.2845	4.408	0.7579	6.388	5.553	5.033	1.036	-9.966
TCGA-AR-A1AN-01	5.636	-1.994	4.348	0.4233	7.08	6.488	6.115	0.9493	0.5763
TCGA-AO-A0JD-01	5.635	0.5568	3.639	0.8647	7.438	7.012	5.992	1.522	-0.7346
TCGA-ZJ-AAX8-01	5.635	-0.3566	4.277	0.9642	5.439	5.132	4.498	1.551	0.044
TCGA-DQ-7595-01	5.635	-1.431	3.94	-0.9406	6.533	5.676	4.944	1.27	1.209
TCGA-DZ-6134-01	5.635	-1.732	-9.966	-3.458	4.517	3.752	3.316	-1.248	0.1519
TCGA-F7-A50J-01	5.634	0.9268	6.372	0.0718	5.848	6.022	4.819	-9.966	-9.966
GTEX-13U4I-1326-SM-5KM25	5.634	-0.5125	5.582	0.517	4.284	0.4016	4.27	-9.966	4.698
GTEX-ZAB5-1526-SM-5HL9P	5.634	-9.966	4.616	0.1519	4.598	0.5763	4.413	-0.5332	3.536
TCGA-21-1083-01	5.633	-1.595	-9.966	1.078	7.045	6.273	5.789	1.305	1.362
TCGA-E2-A159-01	5.632	0.044	4.544	0.7664	7.253	6.59	5.718	1.311	2.17
TCGA-CW-6097-01	5.632	-1.47	-9.966	-0.7108	6.499	6.017	5.305	1.982	1.022
TCGA-22-5477-01	5.631	-0.6873	-9.966	1.561	7.013	5.905	5.696	1.34	0.2029
TCGA-56-1622-01	5.631	-2.548	3.233	0.1903	6.213	5.345	4.99	1.417	2.154
GTEX-WHSE-1626-SM-4M1XL	5.63	-1.884	6.401	0.547	4.697	-9.966	3.89	-9.966	3.929
GTEX-ZDTS-2726-SM-5L3E2	5.629	-2.548	7.134	-1.214	4.552	-9.966	4.38	-0.2159	4.552
TCGA-L5-A4OR-01	5.628	0.7916	-9.966	1.34	4.736	0.9191	5.04	1.795	6.025
GTEX-XAJ8-0426-SM-47JYJ	5.628	0.2522	4.698	1.001	5.02	0.9493	4.566	-0.1993	4.609
TCGA-XF-AAMR-01	5.628	-0.9132	5.719	0.2881	5.618	5.403	4.899	0.058	0.3907
TCGA-BK-A4ZD-11	5.628	-9.966	4.857	1.158	6.373	5.596	4.802	-9.966	0.1648
TCGA-58-A46L-01	5.626	0.346	4.152	1.417	6.419	6.068	5.045	0.5568	3.319
TCGA-EA-A1QT-01	5.623	0.8883	5.999	1.541	7.305	5.661	5.639	2.568	-0.5973
GTEX-144GM-1626-SM-5O9AG	5.623	-1.026	4.537	1.428	4.59	-9.966	4.356	-9.966	3.48
TCGA-CV-A45X-01	5.622	1.05	-2.548	0.4447	5.42	5.053	4.067	1.328	-9.966
TCGA-EY-A3QX-01	5.622	0.5069	6.548	1.919	6.657	6.693	5.38	3.941	3.956
TCGA-L5-A8NQ-01	5.622	-0.4719	-9.966	-0.6873	4.53	1.537	5.065	0.9716	4.932
TCGA-AO-A0J8-01	5.622	-1.149	5.066	0.1519	7.19	5.835	5.703	-0.5332	-0.6873
GTEX-R55G-1626-SM-48FF4	5.622	-2.178	5.527	1.145	5.59	1.74	5.361	-0.2671	5.583
TCGA-EK-A2RE-01	5.62	0.2029	5.363	-0.1993	5.877	5.336	4.686	0.8961	0.7233
TCGA-90-7769-01	5.619	0.5568	5.088	-0.2498	6.278	5.724	5.107	0.4657	-9.966
TCGA-HZ-A77Q-01	5.619	-2.548	5.75	-0.4521	5.148	5.163	4.635	-1.086	-9.966
TCGA-DX-A1KU-01	5.619	-9.966	5.299	-0.3566	6.025	5.607	4.898	-9.966	0.044
TCGA-XF-AAN5-01	5.618	0.9716	6.807	0.3346	5.695	5.853	5.306	0.8805	4.813
TCGA-55-6975-01	5.618	-0.8863	4.655	0.1776	6.707	6.626	5.226	-0.3022	-9.966
GTEX-12WSG-2126-SM-5EGJ7	5.616	-0.0574	5.724	1.022	5.477	-9.966	4.807	-0.7346	5.254
TCGA-FD-A3SN-01	5.615	0.0014	5.636	0.4657	6.528	6.164	4.996	0.7146	1.888
GTEX-13U4I-2426-SM-5LU34	5.615	-0.9132	6.504	0.7146	4.722	-9.966	4.602	-9.966	4.505
TCGA-IG-A625-01	5.615	-9.966	-9.966	0.8568	5.464	1.39	5.8	0.8488	6.816
TCGA-AN-A0G0-01	5.614	-0.3752	-9.966	1.092	7.403	6.107	6.007	1.701	1.941
TCGA-PT-A8TR-01	5.614	-1.884	6.341	2.376	7.527	6.894	6.583	2.164	2.818
TCGA-C5-A1M7-01	5.614	-2.245	5.836	0.7748	6.257	5.666	5.201	-1.149	3.524
TCGA-14-0787-01	5.614	-2.315	6.135	2.053	6.361	2.398	6.139	3.56	6.51
TCGA-VS-A9U6-01	5.613	-1.938	3.077	1.669	6.886	6.296	5.383	1.334	-0.5543
TCGA-E9-A1RI-01	5.611	-0.4719	5.921	-0.2498	6.7	6.204	5.297	-9.966	-9.966
TCGA-AR-A1AL-01	5.61	0.4233	2.696	1.085	6.92	5.852	5.219	1.001	0.9115
TCGA-VS-A9UR-01	5.61	-0.5332	-9.966	1.092	5.898	5.633	5.133	1.674	1.532
TCGA-CQ-A4C9-01	5.609	0.8726	5.158	0.7664	6.641	6.513	5.256	0.2277	-9.966
TCGA-63-7021-01	5.607	0.7493	1.758	0.8488	5.689	5.175	4.032	0.2277	-0.8339
TCGA-F4-6569-01	5.607	-0.9686	2.05	-0.9686	5.743	5.654	4.824	0.1519	-9.966
TCGA-A6-6653-01	5.605	-1.117	2.58	-0.3383	5.893	5.519	4.86	1.581	0.2881
TCGA-CN-A6V6-01	5.605	-9.966	5.435	0.4447	5.813	5.371	5.467	-0.3566	3.115
GTEX-11P81-1126-SM-5GU5G	5.604	-0.5973	5.408	0.9493	5.009	2.814	4.545	-9.966	4.131
TCGA-DX-AB30-01	5.604	-0.7346	1.132	1.351	6.93	6.039	6.002	2.486	0.3796
TCGA-CM-6162-01	5.603	-2.245	-9.966	0.1776	5.756	5.544	4.811	0.4865	-9.966
TCGA-A8-A095-01	5.603	-2.388	4.268	1.233	7.36	6.725	6.319	2.597	-9.966
TCGA-CK-5916-01	5.602	-1.149	-9.966	-0.6416	6.688	6.362	5.281	1.633	2.05
TARGET-50-PAJNYT-01	5.601	-1.355	6.172	2.334	6.236	6.385	6.362	4.607	1.379
TCGA-DX-AB36-01	5.601	-2.388	4.507	0.058	6.023	5.076	4.593	1.852	1.576
TCGA-EK-A3GJ-01	5.6	-0.6873	6.525	1.132	6.151	6.041	4.918	1.125	2.036
TCGA-BR-7957-01	5.6	-0.9686	-9.966	-0.6193	5.495	1.043	5.127	0.4125	5.195
TCGA-ZF-AA5N-01	5.598	-0.1665	5.573	0.4233	5.895	6.523	5.198	0.605	1.138
TCGA-DU-6404-01	5.598	-1.51	-9.966	0.0014	5.62	3.829	4.601	1.491	1.93
TARGET-50-PAJNGH-01	5.597	-1.685	3.457	2.506	6.761	6.604	6.563	5.281	1.345
TCGA-GN-A8LN-01	5.596	1.036	5.226	2.928	6.532	6.099	5.899	4.741	0.679
TCGA-WL-A834-01	5.596	0.6517	4.459	1.465	6.766	6.115	6.37	1.439	-9.966
TCGA-MX-A5UG-01	5.596	0.044	-9.966	-0.6193	4.194	-1.318	4.759	-1.283	5.412
TCGA-C5-A2M2-01	5.596	-2.178	6.207	1.078	6.543	5.707	5.056	1.512	2.202
TCGA-AR-A5QQ-01	5.595	-0.2159	6.105	0.0854	6.642	6.46	5.478	1.66	0.0014
TCGA-21-1081-01	5.595	-0.4521	2.738	1.66	6.491	5.947	5.365	0.4447	1.245
TCGA-A8-A07F-01	5.595	-1.181	-9.966	1.164	7.341	6.827	6.167	1.491	2.018
TCGA-06-0187-01	5.595	-1.214	1.071	0.0718	4.655	1.434	4.937	-0.2671	5.327
TCGA-DK-AA6Q-01	5.595	-3.171	6.597	1.692	6.618	5.645	5.559	0.2642	3.976
TCGA-2J-AABT-01	5.594	-0.8599	4.932	0.6517	4.52	4.223	4.547	-9.966	-9.966
TCGA-AC-A2QI-01	5.594	-3.047	4.369	1.34	6.981	5.653	5.595	-1.056	0.8726
TCGA-63-7023-01	5.593	0.5069	1.434	0.8961	7.045	6.23	5.709	1.619	2.025
TCGA-HB-A5W3-01	5.593	-9.966	5.661	-0.2498	5.17	5.515	3.844	1.233	-9.966
TCGA-O2-A52S-01	5.592	-0.2159	-0.8863	2.559	7.201	6.125	5.53	3.275	1.449
GTEX-131XG-1526-SM-5GCNQ	5.591	-1.639	3.578	1.043	5.107	0.6969	4.838	-9.966	5.152
TCGA-85-8071-01	5.59	-0.3383	3.452	1.795	5.88	6.138	4.734	1.34	0.517
TCGA-CN-4740-01	5.59	-1.283	-9.966	-2.178	5.768	5.025	4.131	-1.51	-9.966
TCGA-68-8251-01	5.589	-0.6643	4.443	1.465	7.252	6.704	5.98	3.592	2.483
TCGA-BH-A18F-01	5.589	-9.966	3.496	1.202	7.437	6.38	6.341	0.8568	2.393
TCGA-D5-6927-01	5.588	-0.5332	-9.966	0.4125	6.442	6.033	5.024	0.03	1.541
GTEX-U3ZN-0008-SM-4DXTL	5.587	-0.4131	-9.966	1.907	5.549	0.547	5.532	-9.966	5.959
TCGA-CN-6998-01	5.587	-2.245	-9.966	-2.245	5.142	4.858	3.691	-1.732	-1.552
TCGA-G2-A2EF-01	5.586	0.8805	6.386	0.6969	6.792	6.827	5.242	1.964	0.9716
TCGA-ER-A19G-06	5.586	0.058	1.9	0.9789	6.426	6.338	5.105	1.561	2.091
TCGA-HT-A5RC-01	5.586	-2.178	-9.966	0.5666	5.076	5.111	4.326	2.211	1.476
TCGA-HU-A4GP-11	5.586	-2.727	2.566	-1.181	4.339	-2.388	3.936	-9.966	5.359
TCGA-XS-A8TJ-01	5.585	0.4125	5.062	1.476	5.934	5.095	5.17	-0.0574	3.025
TCGA-RS-A6TO-01	5.583	0.7407	6.239	1.373	5.839	5.767	5.268	2.39	3.039
TCGA-C5-A7X5-01	5.583	0.0014	4.637	0.1257	6.061	6.075	5.753	1.252	-9.966
TCGA-56-8309-01	5.582	0.5568	4.3	0.2277	5.588	4.819	3.827	0.3115	0.5069
TCGA-GC-A3RB-01	5.582	0.1124	4.596	0.9268	6.467	6.279	5.406	1.96	1.19
TCGA-LN-A49L-01	5.581	0.7664	-9.966	0.5955	5.545	1.656	5.574	1.884	6.02
TCGA-BH-A0DL-01	5.581	-0.4521	5.015	0.7579	6.467	5.567	5.099	0.0158	3.483
TCGA-85-7699-01	5.581	-3.308	2.287	1.512	6.976	6.193	6.033	2.313	0.9862
TCGA-60-2719-01	5.579	0.3231	-9.966	0.9419	6.706	5.74	5.061	0.3796	0.7664
TCGA-A4-7997-01	5.579	-0.5756	-9.966	-0.6193	5.982	4.934	4.28	-1.552	-9.966
TCGA-ER-A2NC-06	5.579	-2.053	5.428	1.015	6.246	6.042	4.92	2.872	2.868
TCGA-32-2616-01	5.578	0.8327	-9.966	0.7916	5.24	1.196	4.74	2.379	5.102
TARGET-50-CAAAAL-01	5.578	0.5069	4.243	2.687	6.873	6.992	6.744	5.42	1.029
TCGA-QK-AA3J-01	5.578	-0.3201	4.881	1.949	6.998	5.84	5.983	0.5859	1.385
TCGA-E2-A1BC-01	5.578	-1.056	5.478	-0.5125	6.291	4.124	5.09	-0.3752	5.511
GTEX-13G51-2126-SM-5IJD9	5.578	-9.966	7.502	-0.0877	4.479	1.239	4.453	-9.966	4.67
TCGA-55-1594-01	5.577	0.5859	-9.966	1.19	6.665	6.062	5.18	1.057	1.145
TCGA-BA-A4IG-01	5.577	-0.0277	2.563	-0.6193	6.253	6.084	4.922	1.679	1.34
TCGA-VQ-A91K-01	5.577	-0.7346	-9.966	-0.0574	4.574	-0.6193	4.844	0.9038	5.836
TCGA-DX-AB3A-01	5.577	-1.149	7.252	-1.318	4.832	4.99	4.612	-0.3383	3.109
TCGA-BH-A0DX-01	5.577	-2.826	5.568	0.24	7.139	5.746	5.282	-9.966	-9.966
GTEX-11ZTT-1626-SM-5EQKR	5.576	0.044	4.516	0.7832	4.452	-9.966	4.47	-9.966	3.741
TCGA-D6-A4ZB-01	5.576	0.0158	5.16	-0.3022	5.465	5.462	4.38	0.7058	-0.0725
TCGA-LP-A4AU-01	5.575	-0.5543	5.559	1.412	6.422	5.908	5.248	1.585	1.486
GTEX-11ZVC-2126-SM-5EGJ1	5.575	-0.8084	6.719	-0.0277	5.167	-9.966	4.675	-9.966	4.904
TCGA-86-8075-01	5.574	-1.552	3.883	0.7146	5.753	5.141	4.833	2.447	3.999
TCGA-BF-AAP6-01	5.573	1.439	-9.966	2.205	7.353	6.805	6.929	3.118	0.6425
TCGA-LN-A49K-01	5.573	0.4967	-9.966	1.546	5.197	1.546	5.415	1.19	6.007
TCGA-EE-A2GS-06	5.573	0.3115	4.239	1.064	7.464	6.862	6.06	3.086	3.503
TCGA-L5-A4OX-01	5.571	0.1519	-9.966	1.183	5.543	-0.1828	5.992	2.018	6.917
TCGA-LP-A4AV-01	5.571	-0.3752	8.021	-1.51	6.337	7.562	4.86	-2.053	6.661
TCGA-C5-A1MH-01	5.571	-0.6873	4.607	0.2762	6.592	5.771	4.903	0.4865	0.3907
TCGA-JV-A5VE-01	5.571	-0.9686	5.55	1.824	5.952	6.048	4.62	3.768	1.903
TCGA-CQ-5325-01	5.57	-1.117	-9.966	-1.685	5.056	4.921	3.995	-0.7108	-9.966
TCGA-12-0619-01	5.569	-0.5332	2.749	1.305	5.623	-0.4921	5.398	2.412	5.524
TCGA-E9-A1N6-01	5.569	-2.466	4.214	-0.4719	6.958	5.999	5.043	-0.8863	1.008
TCGA-DD-A4NA-01	5.568	0.5859	-9.966	-0.1031	5.371	5.559	4.449	-9.966	-0.6873
TCGA-W6-AA0S-01	5.568	0.5271	5.259	0.1776	6.028	4.828	5.083	-0.7346	-9.966
TCGA-AA-3655-01	5.568	-0.4521	2.313	0.4865	6.309	4.835	4.69	1.071	0.9642
TCGA-OL-A6VQ-01	5.568	-1.056	2.894	0.7664	6.478	4.82	5.871	-9.966	-9.966
TCGA-E9-A22E-01	5.568	-1.595	6.322	-0.1031	6.72	6.674	5.341	-0.8339	-9.966
TCGA-12-3653-01	5.567	1.022	1.196	-0.3383	5.57	0.1776	5.618	1.379	5.685
TCGA-QQ-A8VB-01	5.567	-1.283	5.481	1.585	5.947	6.009	5.553	2.342	1.576
TCGA-60-2696-01	5.566	0.5271	-9.966	-0.3022	6.532	5.367	5.073	1.476	-0.9132
TCGA-BH-A201-01	5.566	-0.2328	5.147	0.5271	6.704	6.098	5.214	0.4447	1.66
TCGA-BH-A18I-01	5.565	-1.431	4.733	0.517	6.457	4.813	4.965	-0.3752	-9.966
TCGA-HQ-A5ND-01	5.564	0.3231	4.683	0.2029	6.326	6.419	4.823	-0.5973	1.84
TCGA-VS-A9UM-01	5.564	-1.283	2.488	1.252	5.818	4.024	4.843	-0.2328	1.423
TCGA-FS-A1ZH-06	5.563	-2.178	4.749	2.173	6.232	6.357	4.942	2.943	1.941
TCGA-D8-A1JM-01	5.563	-2.932	3.387	0.9268	7.471	6.797	5.628	2.457	-0.7834
TCGA-E7-A3X6-01	5.563	-3.171	5.329	0.7664	6.621	6.177	5.458	-9.966	1.71
TCGA-VQ-A91Y-01	5.562	0.1648	0.7493	-0.4131	4.507	-1.552	4.475	-0.7834	5.652
TCGA-AJ-A3NE-01	5.562	-0.4325	4.746	1.183	6.463	6.177	5.548	0.7748	2.296
TCGA-66-2787-01	5.561	-0.1665	4.308	0.7664	7.229	5.864	5.505	1.158	1.118
TCGA-D5-6922-01	5.561	-0.6193	-9.966	1.151	6.256	5.607	5.633	2.05	1.092
TCGA-SI-A71Q-01	5.561	-2.727	5.498	2.091	6.349	6.527	6.224	4.021	2.365
TCGA-XP-A8T8-01	5.56	0.6332	-9.966	0.0014	5.748	3.286	5.756	0.5271	5.421
TCGA-ER-A2NH-06	5.56	-0.5125	3.139	0.434	6.645	5.471	5.137	-1.056	2.632
TCGA-22-4613-01	5.559	0.2998	-9.966	0.6239	6.453	5.993	5.055	0.537	-9.966
TCGA-22-0940-01	5.559	-0.0574	3.876	0.9862	6.662	5.585	5.317	2.604	-9.966
TCGA-70-6723-01	5.559	-0.8863	1.71	0.9862	6.488	5.775	5.39	1.132	2.611
GTEX-R53T-1026-SM-48FCO	5.559	-1.994	5.727	-0.8339	4.864	-9.966	4.068	-9.966	3.342
TCGA-85-A5B5-01	5.558	0.8327	7.648	1.864	7.005	6.767	5.36	-0.394	2.913
TCGA-77-7141-01	5.558	-0.3566	2.496	1.164	6.672	6.238	5.651	1.516	0.8883
GTEX-11TTK-2426-SM-5PNYO	5.558	-1.938	6.741	0.346	5.075	3.725	4.356	-9.966	3.653
TCGA-FS-A1ZR-06	5.557	0.8164	-9.966	0.5955	6.451	5.964	5.12	0.517	1.619
GTEX-11GSP-1626-SM-5986N	5.556	-0.3022	6.731	-0.1828	3.39	-9.966	4.048	-9.966	4.867
TCGA-FD-A3SP-01	5.556	-0.9406	5.09	0.1776	6.664	6.642	5.55	1.651	-9.966
TCGA-GL-6846-01	5.556	-0.9971	4.783	-1.214	4.578	4.642	3.636	0.2029	-0.4719
GTEX-ZPU1-1726-SM-4WWFV	5.556	-2.727	5.668	0.4967	4.695	-9.966	4.285	-9.966	4.406
TCGA-CK-6746-01	5.555	-1.149	-9.966	-1.732	5.896	5.194	5.483	1.537	1.202
TCGA-85-6561-01	5.554	-0.4325	-9.966	-0.4921	5.733	4.714	4.502	-1.248	-0.3022
TCGA-CN-6017-01	5.554	-2.245	-9.966	-2.548	4.991	4.32	3.376	-0.1031	-9.966
TCGA-BH-A0W4-01	5.553	-0.6416	4.397	0.1776	6.615	5.224	4.9	0.4233	0.1388
GTEX-T5JW-0326-SM-4DM6J	5.552	-1.026	5.22	2.546	5.208	-9.966	4.979	-9.966	5.975
TCGA-NA-A4R0-01	5.551	-0.8863	6.198	2.47	6.764	6.154	5.103	3	2.296
TCGA-EX-A1H5-01	5.551	-2.245	6.994	1.926	6.941	6.398	5.681	1.276	1.396
TCGA-85-8049-01	5.55	-0.3383	-9.966	-0.6193	6.017	5.228	4.706	0.2998	-9.966
TCGA-ZB-A96L-01	5.55	-1.831	2.431	0.9716	6.038	5.745	5.472	0.1388	-9.966
TCGA-BH-A18V-01	5.549	0.044	-9.966	-0.7588	6.691	5.828	4.888	-1.431	-0.0877
GTEX-14BMU-1326-SM-5RQIH	5.549	-9.966	4.646	0.8961	5.093	-9.966	4.351	-9.966	4.589
TCGA-CN-4727-01	5.549	-9.966	-9.966	-0.4325	6.491	5.594	4.718	1.158	-9.966
TCGA-C5-A7XC-01	5.547	0.6145	4.104	0.1519	5.981	5.198	4.917	-1.639	1.665
TCGA-F4-6459-01	5.547	-1.431	-9.966	0.3685	6.391	6.076	5.835	1.656	-9.966
TCGA-DK-AA6S-01	5.546	-0.9971	6.61	0.2998	6.027	4.685	5.178	-1.355	3.823
TCGA-85-A511-01	5.545	0.2642	5.015	1.112	6.174	6.435	4.845	2.183	0.3231
TCGA-DX-A6BE-01	5.545	-1.994	6.443	-1.47	4.498	5.078	4.453	-1.248	-9.966
TCGA-55-8299-01	5.542	1.566	5.18	0.5069	5.677	5.5	5.032	0.9568	1.605
TCGA-F1-6177-01	5.542	-0.3566	-9.966	-0.0425	4.36	-0.4131	4.947	0.2762	5.899
TCGA-B8-4621-01	5.542	-1.831	-9.966	-1.026	4.927	3.964	3.738	-1.056	1.132
TCGA-D8-A1JD-01	5.541	-0.8339	-9.966	1.125	7.215	6.82	6.162	2.121	1.496
GTEX-P4QT-2026-SM-3NMCJ	5.541	-1.117	4.357	0.9716	4.802	2.501	4.645	-9.966	4.529
TCGA-EV-5901-01	5.541	-1.47	-9.966	-0.4131	5.084	4.373	3.983	-1.685	-0.9132
GTEX-132NY-2726-SM-5PNY2	5.54	-2.114	7.244	-1.214	4.948	2.803	4.291	-9.966	3.769
GTEX-TKQ1-0626-SM-4DXTS	5.54	-9.966	4.526	1.749	4.646	-9.966	4.253	-9.966	3.954
TCGA-W5-AA31-01	5.539	-0.6873	2.676	0.6517	6.496	5.673	5.061	1.609	1.328
TCGA-A2-A3XY-01	5.539	-1.248	4.14	0.346	6.538	4.572	5.234	-0.5125	0.9935
TCGA-E1-5304-01	5.538	-9.966	4.081	2.053	6.687	5.114	5.319	3.894	2.694
TCGA-HR-A5NC-01	5.537	1.125	-0.1828	0.5666	5.749	5.798	5.084	1.196	1.221
TCGA-CN-5358-01	5.537	-9.966	-9.966	-1.938	4.904	4.646	3.736	-0.3752	-0.3752
GTEX-YJ8A-1226-SM-5IFHH	5.536	0.044	5.094	1.057	3.679	2.509	4.359	-9.966	4.249
GTEX-145ME-1326-SM-5O98Q	5.536	-0.9132	4.667	1.022	5.257	-9.966	4.958	-9.966	4.627
GTEX-111YS-1626-SM-5GZZ9	5.536	-1.117	5.386	1.171	4.775	-9.966	4.425	-9.966	4.403
TCGA-AX-A05Y-11	5.534	-9.966	6.263	-0.2671	6.333	6.049	4.809	-9.966	-9.966
GTEX-ZF2S-1326-SM-4WWAZ	5.534	-9.966	4.988	0.0718	4.911	-9.966	3.959	-0.2845	2.561
TCGA-50-6591-01	5.533	-9.966	4.678	2.787	7.833	7.35	6.577	4.759	4.232
TCGA-CV-5439-01	5.532	0.346	3.421	-3.047	5.477	4.112	4.005	-9.966	-9.966
TCGA-56-A5DS-01	5.532	-0.0725	4.787	1.132	5.854	5.514	4.404	-0.2159	2.433
TCGA-MA-AA3W-01	5.532	-0.6193	5.731	0.2762	5.85	5.144	4.906	0.2277	1.945
TCGA-06-2557-01	5.532	-1.086	3.574	1.945	5.705	1.949	5.65	2.905	5.566
TCGA-Z6-A8JE-01	5.531	0.9115	4.771	1.732	5.083	-0.6873	5.738	1.177	7.187
TCGA-AN-A0FS-01	5.531	-0.6416	5.083	0.8883	7.28	6.496	6.295	1.071	-9.966
TCGA-AC-A23E-01	5.53	-0.6873	3.192	0.434	6.802	6.409	5.865	0.044	-9.966
TCGA-AN-A03X-01	5.53	-9.966	4.368	-9.966	4.725	6.551	5.771	-9.966	1.997
GTEX-11P7K-1826-SM-5HL5A	5.529	-1.056	3.987	0.5271	4.798	-9.966	4.533	-9.966	4.838
TCGA-CV-6942-01	5.529	-2.245	5.968	0.3685	5.978	5.538	4.875	-1.392	1.085
TCGA-37-3789-01	5.528	0.03	3.687	0.1388	6.729	6.376	5.333	0.3907	-9.966
TCGA-DS-A1OA-01	5.528	-0.5332	6.469	0.5568	6.258	4.807	4.372	1.057	0.7058
TCGA-E2-A152-01	5.528	-9.966	4.776	-0.3022	6.614	5.865	4.82	0.4125	-9.966
TCGA-CS-6188-01	5.527	-0.1504	-9.966	-0.2671	5.375	4.964	4.106	0.3907	0.7579
TCGA-A8-A090-01	5.527	-0.7834	2.227	0.1903	6.874	4.292	4.631	1.322	2.161
TCGA-32-1970-01	5.527	-9.966	2.909	1.171	5.291	1.566	5.094	1.804	5.329
TCGA-06-2563-01	5.526	-0.7346	3.036	0.9343	4.959	1.064	5.554	0.2881	5.103
TCGA-DX-AB2T-01	5.526	-1.732	4.926	-0.1665	5.588	4.088	4.9	0.6517	1.092
GTEX-1122O-1426-SM-5H11R	5.526	-9.966	5.947	1.151	4.947	-9.966	4.566	-9.966	4.485
TCGA-DK-A2I6-01	5.525	0.0158	5.415	0.058	5.709	5.778	4.562	-1.392	-9.966
TCGA-FD-A6TC-01	5.525	-0.3752	6.424	-0.9686	5.985	6.29	5.47	-1.732	-9.966
TCGA-CV-7434-11	5.525	-1.026	4.767	-1.355	4.974	5.17	4.006	-0.6643	-0.9686
TCGA-63-5128-01	5.524	1.164	-9.966	-0.2498	6.492	5.969	4.882	1.202	-0.3383
TCGA-CV-A468-01	5.524	0.2522	5.69	-0.6193	5.439	5.297	4.172	-1.248	-0.4719
TCGA-61-2003-01	5.524	-1.431	-9.966	0.4865	5.072	-1.831	5.337	0.7146	5.925
TCGA-XF-A8HE-01	5.522	0.6239	5.012	0.058	5.716	5.306	4.965	-0.0277	-9.966
TCGA-AN-A0XP-01	5.522	-0.3752	4.536	0.0854	7.141	6.17	5.777	-9.966	0.6425
GTEX-11DXZ-1826-SM-5H12Y	5.522	-0.5756	5.189	0.2762	4.768	-9.966	4.305	-9.966	3.5
TCGA-60-2695-01	5.522	-0.7834	-9.966	2.183	7.463	6.499	5.567	2.768	0.9642
TCGA-A2-A0YI-01	5.521	-0.3383	4.214	0.2998	6.326	5.556	5.211	-0.0277	1.791
TCGA-CQ-5333-01	5.521	-0.4719	6.891	-0.5125	5.887	5.603	4.794	0.4552	-9.966
TCGA-K4-A5RI-01	5.521	-1.47	6.155	0.9343	6.783	6.48	5.521	0.4125	-0.2845
TCGA-CZ-5468-01	5.521	-1.552	6.265	0.03	5.625	5.354	4.094	-0.0277	-9.966
TCGA-EE-A17X-06	5.521	-1.938	0.2762	-0.6193	5.792	5.042	4.271	2.151	-9.966
TCGA-UT-A88G-01	5.52	-0.9971	3.029	2.359	6.337	5.651	5.755	2.757	1.696
TCGA-C8-A137-01	5.519	-0.6416	5.32	-0.9406	6.887	5.98	5.16	0.6145	-9.966
TCGA-E9-A22H-01	5.519	-0.8339	3.969	0.1903	7.187	6.658	5.855	2.214	0.3573
TCGA-BR-8592-01	5.519	-1.51	-9.966	-0.4325	4.241	4.627	4.574	-1.149	-9.966
TCGA-FU-A2QG-01	5.518	0.1257	4.537	-0.3022	6.242	5.81	5.391	0.346	1.233
TCGA-CV-7238-01	5.517	-0.4325	3.664	0.2277	5.72	4.236	3.996	-9.966	0.4967
TCGA-IE-A4EI-01	5.516	-0.0877	2.412	0.3231	5.98	5.608	4.655	1.064	-9.966
TCGA-DA-A1I8-06	5.515	0.9268	-9.966	-1.831	4.958	5.111	3.328	-1.552	-9.966
TCGA-D6-6516-01	5.515	0.5763	-2.388	-1.47	5.338	4.276	3.758	-1.639	-9.966
TCGA-66-2769-01	5.515	0.1648	-0.0425	-0.4325	6.881	5.815	5.51	2.084	-9.966
TCGA-BH-A204-01	5.515	-0.0877	4.41	-0.3566	7.014	6.296	5.735	-0.4325	-9.966
GTEX-ZPIC-2626-SM-57WE2	5.515	-9.966	4.839	0.8082	5.023	-9.966	4.584	-0.8339	4.858
TCGA-AX-A3FV-01	5.514	-0.2671	5.468	2.164	7.618	7.379	6.535	3.228	4.194
TCGA-UZ-A9PV-01	5.514	-0.3383	6.628	0.6608	5.253	5.035	4.541	-0.9406	0.0014
GTEX-S4Q7-0008-SM-3NM8A	5.513	-0.1993	2.899	2.263	6.027	0.8805	5.881	0.1124	6.079
TCGA-52-7811-01	5.513	-0.3566	4.826	-0.3201	5.895	5.402	4.595	-1.026	2.78
TCGA-A6-2675-11	5.513	-9.966	1.907	-1.214	5.032	4.127	4.044	0.9115	-0.0574
TCGA-VS-A954-01	5.512	-1.51	6.714	0.3796	6.39	5.907	5.609	0.2522	-9.966
GTEX-117YX-0526-SM-5EGJH	5.512	-1.831	5.035	1.281	5.322	-9.966	4.553	-9.966	1.449
GTEX-QLQ7-1026-SM-447BB	5.512	-1.938	4.43	1.196	5.241	1.252	4.629	-0.3201	4.216
TCGA-HB-A43Z-01	5.511	-1.392	-9.966	2.033	6.712	5.292	4.885	3.277	2.846
TCGA-DK-A3WW-01	5.509	1.071	7.275	0.0718	6.258	6.385	5.204	1.057	1.47
TCGA-BA-A6DI-01	5.509	-0.1345	1.47	0.5568	5.951	5.871	4.823	0.7493	-0.2671
TCGA-37-A5EL-01	5.509	-0.3383	6.059	1.39	6.443	6.14	5.23	1.762	-0.0277
TCGA-EE-A2ML-06	5.509	-0.9406	-9.966	-0.1828	6.47	4.592	5.098	0.3115	1.177
TCGA-XD-AAUG-01	5.509	-2.548	5.623	-0.4131	4.733	5.094	4.491	-0.1828	-9.966
GTEX-13FH7-1626-SM-5J2O9	5.508	-1.117	4.663	1.064	4.522	1.791	4.534	-9.966	4.379
TCGA-XF-AAN3-01	5.508	-1.355	5.864	-0.3022	6.024	6.081	5.019	-1.214	1.092
TCGA-CG-4462-01	5.507	-0.3022	-9.966	-1.639	5.41	5.254	3.782	-1.831	-9.966
TCGA-33-A4WN-01	5.507	-0.3566	2.604	0.9716	6.872	6.105	5.166	0.9419	-9.966
TCGA-L5-A43I-01	5.507	-1.086	-9.966	-0.1345	4.319	0.4016	4.683	-0.4131	5.684
TCGA-UF-A7JV-01	5.506	1.015	4.625	0.2642	6.097	4.866	5.341	1.423	0.1648
TCGA-55-6981-01	5.506	0.1257	4.321	0.3115	5.68	5.111	4.456	-0.4131	-9.966
TCGA-E6-A2P9-01	5.506	-0.4325	5.781	1.753	6.907	6.356	5.207	1.903	0.7832
TCGA-AR-A24N-01	5.504	-0.2159	3.498	-0.0877	7.26	6.471	5.659	0.517	1.008
TCGA-E2-A150-01	5.504	-1.392	3.478	0.5859	6.456	5.951	5.301	-0.3566	0.346
GTEX-T6MO-1026-SM-4DM72	5.503	-1.056	5.718	2.499	5	-9.966	4.634	0.0718	4.83
TCGA-EK-A2RA-01	5.502	-0.7108	7.873	1.476	6.639	6.434	5.34	0.9568	2.901
TARGET-50-CAAAAS-01	5.501	-9.966	3.899	3.101	8.26	8.236	7.968	5.251	2.348
TCGA-MU-A8JM-01	5.5	1.132	5.83	-0.1187	5.546	5.006	4.736	-1.994	-9.966
TCGA-44-6779-01	5.5	-0.5125	2.975	-0.7108	5.981	5.442	4.047	-9.966	-9.966
TCGA-AO-A0JA-01	5.498	-1.552	4.644	0.4447	6.932	6.202	5.933	1.486	5.991
TCGA-XC-AA0X-01	5.497	-0.0574	-9.966	1.46	5.775	5.269	4.939	0.7058	-0.5973
TCGA-CR-6470-01	5.497	-1.994	-9.966	-0.4921	5.789	5.21	4.264	0.547	-9.966
TCGA-UF-A718-01	5.496	-0.8084	2.121	0.5859	5.796	5.686	5.3	1.322	0.4233
TCGA-D7-A747-01	5.496	-1.831	5.224	0.7321	5.236	-0.3201	4.363	-9.966	5.762
TCGA-DX-A1L0-01	5.496	-2.466	5.633	-0.0877	5.261	5.08	4.188	2.359	-9.966
TCGA-DU-7292-01	5.496	-2.727	1.628	4.064	9.234	8.565	8.226	5.403	4.271
TCGA-D8-A1JE-01	5.496	-2.932	5.798	-1.181	6.764	6.452	5.212	-9.966	-0.2159
GTEX-12WSJ-1426-SM-5GCON	5.495	0.0718	4.982	1.804	4.689	0.9789	4.622	-9.966	4.446
TCGA-BT-A20W-11	5.495	-2.548	5.19	-0.0877	6.224	6.385	4.804	0.0718	-9.966
TCGA-3B-A9HX-01	5.494	-0.9132	-9.966	1.015	5.818	5.03	4.878	2.544	-0.4325
TCGA-B2-5636-01	5.494	-1.181	-9.966	-0.5756	5.261	4.74	4.902	-1.355	1.82
TCGA-18-5595-01	5.494	-1.732	-9.966	0.7233	6.334	5.648	5.547	1.77	-9.966
TCGA-EE-A29X-06	5.492	-0.2498	-9.966	-1.685	5.383	5.661	4.111	-1.431	-9.966
GTEX-ZYFG-1926-SM-5GID5	5.492	-2.315	4.608	1.015	4.237	-0.1345	4.323	-9.966	4.548
GTEX-ZYFG-1826-SM-5GZWX	5.492	-9.966	5.114	-0.0877	4.734	2.483	4.052	-0.1993	4.211
TCGA-E2-A3DX-01	5.491	-2.932	-9.966	1.057	5.169	4.829	4.854	-1.056	3.341
GTEX-ZF28-2526-SM-57WFH	5.489	-1.47	7.598	0.3907	4.476	2.401	4.318	-9.966	4.35
TCGA-06-2565-01	5.488	-2.178	2.913	1.714	5.286	1.941	5.344	2.141	5.429
TCGA-XX-A89A-01	5.487	0.044	4.432	1.171	5.672	4.958	4.956	-1.392	1.84
TCGA-A7-A4SD-01	5.487	-0.2671	-9.966	0.8082	6.746	5.787	5.267	0.5271	-9.966
TCGA-83-5908-01	5.486	-1.639	2.723	1.719	6.536	6.27	5.542	2.373	1.449
TCGA-BR-8373-01	5.486	-9.966	-9.966	-0.4719	4.252	2.275	3.904	-0.2159	3.649
GTEX-WHSE-0126-SM-3NMBT	5.485	2.302	4.911	1.078	4.47	-9.966	4.093	-9.966	4.471
TCGA-18-4086-01	5.484	0.8408	2.211	0.1776	6.626	6.019	5.312	1.305	-0.8863
GTEX-WEY5-0726-SM-4LMID	5.483	0.1388	3.356	1.804	5.135	-9.966	4.925	-9.966	4.451
TCGA-H6-8124-11	5.483	-0.9971	5.284	-0.3022	5.578	5.305	4.356	-1.47	-9.966
TCGA-EA-A5ZE-01	5.483	-2.315	6.6	1.719	7.666	7.561	6.226	2.078	1.546
GTEX-S341-1026-SM-4AD71	5.483	-9.966	5.339	1.171	5.254	-9.966	4.744	-9.966	4.431
TCGA-EY-A72D-01	5.482	-0.5332	5.101	0.5271	5.881	5.593	5.366	1.064	1.015
TCGA-2Z-A9JR-01	5.481	-2.053	5.601	0.4552	4.916	5.165	4.681	-1.51	0.7321
TCGA-E5-A2PC-01	5.48	-1.355	6.471	0.3907	6.492	6.466	4.865	-0.013	-0.8339
TCGA-EJ-7781-11	5.48	-1.595	2.757	-0.9406	5.341	4.946	4.64	-9.966	-9.966
TCGA-MB-A8JL-01	5.48	-1.639	2.588	0.7233	5.298	4.315	4.61	2.428	0.6145
TCGA-BH-A0HQ-01	5.479	-1.732	4.326	1.043	7.166	5.867	5.711	0.3907	-0.3201
TARGET-50-PAJNGH-02	5.479	-1.994	3.891	2.319	6.538	6.388	6.231	5.338	0.5568
TCGA-K1-A3PN-01	5.479	-3.047	5.342	-0.1031	5.414	5.573	4.508	1.537	-9.966
TCGA-BQ-5877-01	5.478	-0.8084	1.911	-1.685	5.765	5.114	4.307	-1.51	0.0718
TCGA-EA-A3HU-01	5.478	-1.595	5.201	-0.5973	5.884	5.664	4.967	0.5763	2.046
GTEX-146FH-2426-SM-5Q5EW	5.477	0.0854	6.893	0.2998	5.639	1.787	4.412	0.8883	3.524
TCGA-JY-A6FA-01	5.477	-0.4521	-9.966	-0.0277	4.947	1.098	5.489	1.623	5.763
GTEX-U8XE-1826-SM-4E3HV	5.477	-1.431	5.579	1.105	5.028	-9.966	4.698	-0.3752	5.122
TCGA-60-2704-01	5.476	0.2029	-9.966	0.346	5.544	5.05	4.365	0.5955	-9.966
TCGA-61-2097-01	5.476	-0.6873	-1.086	0.434	4.877	-9.966	4.983	-0.1993	6.405
TCGA-UF-A7JD-01	5.475	0.688	5.123	0.7664	6.26	5.757	5.749	1.281	-9.966
TCGA-AX-A2HC-11	5.475	-1.283	5.573	-1.318	5.211	5.722	4.517	0.679	0.2881
TCGA-N6-A4VF-01	5.475	-1.831	6.432	1.93	7.004	6.699	5.674	4.847	2.425
TCGA-K1-A3PN-02	5.475	-1.994	6.884	-0.0725	5.952	5.685	4.762	1.93	0.6608
GTEX-117YX-0826-SM-5H11J	5.475	-2.388	3.924	1.015	4.835	-9.966	4.438	0.1903	3.833
TCGA-85-A512-01	5.473	-0.9971	6.529	0.4967	5.906	5.263	4.459	0.6608	2.248
TCGA-77-8148-01	5.473	-1.117	3.837	1.736	6.634	6.424	5.509	1.791	0.9568
TCGA-GM-A2DI-01	5.471	-1.47	-9.966	0.6332	5.825	5.204	5.065	0.4016	2.778
TCGA-06-2562-01	5.47	-0.5756	0.9419	1.015	5.031	-0.8084	5.311	0.2642	5.136
TCGA-CJ-6030-01	5.469	0.058	5.219	-0.8084	6.076	5.438	4.43	-0.3383	-9.966
TCGA-X6-A7WD-01	5.467	0.4447	2.511	1.423	5.549	5.212	5.27	3.168	-9.966
TCGA-HD-7917-01	5.467	0.0014	4.459	-0.3752	6.396	5.571	4.966	0.346	-9.966
TCGA-CV-A460-01	5.467	-0.4921	5.322	0.0854	5.938	5.766	4.577	-9.966	-9.966
TARGET-50-PAJNNC-01	5.466	-1.056	5.121	3.979	7.724	7.652	7.715	6.611	1.215
TCGA-AJ-A2QM-01	5.466	-2.466	4.307	1.481	6.699	6.279	5.598	1.945	-9.966
GTEX-ZF2S-1826-SM-4WKFF	5.465	-2.114	6.883	0.1124	4.76	2.011	3.895	-9.966	4.687
TCGA-A1-A0SN-01	5.465	-2.635	-9.966	-0.3201	7.013	6.328	5.797	-0.5543	-0.1993
TCGA-DX-A2IZ-01	5.464	-0.1031	4.318	1.934	6.126	5.811	5.591	1.085	0.7748
TCGA-44-7660-01	5.464	-1.51	5.856	1.945	6.732	6.616	5.638	2.057	2.519
GTEX-117XS-2226-SM-5GIE1	5.464	-2.315	7.361	-0.5125	3.951	3.522	4.3	-9.966	4.064
TCGA-66-2783-01	5.463	-0.1665	-9.966	-0.4921	6.232	5.945	5.136	0.6145	0.044
TCGA-19-1390-01	5.463	-0.8863	2.534	1.651	5.287	1.633	5.173	2.544	5.345
TCGA-E2-A1B0-01	5.463	-1.884	3.462	0.1124	6.868	6.587	5.457	0.1648	1.202
GTEX-XPVG-1726-SM-4B65W	5.462	-0.3752	5.597	1.808	4.383	1.808	3.777	-9.966	3.914
TCGA-E9-A1RD-01	5.462	-0.5973	5.019	-0.6193	7.027	6.345	5.97	0.0718	1.527
GTEX-147JS-2626-SM-5S2UX	5.462	-9.966	7.285	0.9789	4.68	2.39	4.257	-9.966	3.665
TCGA-49-AAR9-01	5.461	0.4967	4.791	2.23	7.287	4.872	6.068	2.125	3.92
TCGA-E9-A1N5-11	5.461	0.0854	-9.966	-0.1665	6.058	5.119	4.893	1.064	-9.966
GTEX-ZF29-1726-SM-4WKFV	5.458	-0.4719	4.784	1.551	4.798	-9.966	4.008	-0.3383	3.844
TCGA-DC-6156-01	5.458	-1.318	4.672	-0.3566	6.555	5.811	4.949	-0.1345	-9.966
GTEX-RU72-2626-SM-4TT75	5.457	-0.7834	6.812	0.9493	5.382	-9.966	4.636	0.7233	5.29
TCGA-MY-A913-01	5.456	-0.5332	4.253	1.334	5.856	5.695	5.351	2.576	1.556
TCGA-BH-A1FE-06	5.455	-1.781	-9.966	-0.1187	5.075	4.707	4.456	0.7916	3.682
TCGA-ZB-A969-01	5.455	-1.994	4.798	1.057	6.27	5.739	5.479	1.299	1.05
TCGA-66-2777-01	5.454	-0.1187	-9.966	-0.3022	6.272	5.463	5.177	-0.1031	-9.966
TCGA-46-3768-01	5.453	-1.355	-9.966	0.5666	7.228	5.822	5.266	-0.4521	-9.966
TCGA-CV-A45Y-01	5.452	-0.394	4.634	0.8246	4.929	5.29	4.216	-9.966	-9.966
TCGA-QK-A6IG-01	5.451	0.2029	6.693	0.5955	6.625	6.001	5.141	-1.086	4.124
TCGA-A2-A25C-01	5.451	-2.178	2.934	1.368	7.345	6.473	5.578	0.2154	-0.5332
GTEX-11ZTS-2326-SM-5EQMY	5.45	-1.214	6.642	0.8961	5.069	3.45	4.861	-9.966	4.772
GTEX-11P81-1426-SM-5P9JN	5.45	-1.639	5.156	-0.9686	4.803	-9.966	4.434	-1.149	4.199
TCGA-CN-6024-01	5.449	1.311	1.633	0.9642	6.148	5.598	4.846	0.3796	1.043
GTEX-139TU-1926-SM-5J2OC	5.449	0.9268	5.898	-1.639	4.425	-9.966	3.985	-9.966	4.521
GTEX-O5YW-1426-SM-3MJHF	5.449	-0.8084	5.267	0.9343	4.081	1.77	4.685	-9.966	4.936
TCGA-98-7454-01	5.449	-1.431	2.095	-1.431	6.517	6.134	4.593	-1.51	-9.966
TCGA-24-1567-01	5.448	0.517	-9.966	1.362	6.655	5.753	6.308	4.048	5.712
GTEX-132NY-1426-SM-5J1MJ	5.448	0.2642	6.016	-0.9132	4.797	2.029	4.049	-9.966	4.242
TCGA-AJ-A6NU-01	5.448	-0.5756	2.417	0.7916	6.303	5.705	5.587	1.362	1.276
TCGA-UC-A7PG-06	5.448	-0.7346	6.175	1.417	5.919	6.207	5.453	-0.9686	-0.8084
TCGA-56-8305-01	5.447	0.537	3.505	1.93	6.872	6.513	6.011	3.119	2.872
TCGA-90-7767-01	5.447	-0.6193	2.866	1.566	7.555	7.15	6.451	3.494	1.177
TCGA-IB-A5SQ-01	5.446	-1.51	5.914	-0.8863	5.044	5.51	4.919	-0.5125	0.03
TCGA-EW-A1PF-01	5.446	-1.595	-9.966	0.1388	6.387	4.969	4.739	-1.318	0.8805
TCGA-CN-4730-01	5.446	-3.308	2.395	-1.283	6.123	5.993	4.968	1.092	0.2642
TCGA-BQ-7046-01	5.445	0.2522	5.145	-1.214	4.925	4.277	3.531	-9.966	-0.2328
TCGA-L3-A4E7-01	5.445	-0.5332	5.423	1.651	5.842	5.842	4.709	-0.1665	3.387
TCGA-A8-A0A1-01	5.445	-2.114	1.82	0.1776	6.857	5.504	5.163	0.3907	3.236
TCGA-ZX-AA5X-01	5.445	-9.966	5.219	0.5568	5.979	4.898	4.862	0.2642	2.795
TCGA-BP-4967-01	5.444	-1.056	-9.966	-0.5543	5.348	4.902	4.229	-0.013	-9.966
TCGA-A2-A0EW-01	5.444	-2.548	4.283	0.7058	6.061	5.572	4.872	-9.966	-9.966
TCGA-CV-6953-01	5.443	1.05	3.441	-1.595	4.598	4.919	3.959	-9.966	-0.394
TCGA-ZH-A8Y5-01	5.442	1.239	5.255	2.71	7.455	5.958	6.764	1.258	2.556
TCGA-UF-A71E-01	5.442	-0.3383	5.229	1.233	6.402	6.168	5.479	0.1648	0.044
TCGA-HT-7860-01	5.442	-0.3566	-9.966	0.2762	5.583	5.096	4.425	-9.966	-9.966
TCGA-D8-A1JA-01	5.442	-2.635	4.177	-0.0725	7.658	5.374	5.445	-9.966	4.14
TCGA-LI-A9QH-01	5.441	-0.8084	5.712	1.196	5.736	5.207	4.745	1.753	1.351
TCGA-BI-A20A-01	5.441	-0.8599	6.204	1.118	6.952	5.038	5.215	0.5955	2.846
TCGA-D7-6526-01	5.439	0.346	-9.966	0.4016	5.106	-9.966	5.478	0.6145	6.504
TCGA-39-5029-01	5.439	0.0718	3.93	-1.552	5.582	5.358	4.237	-1.47	-9.966
TCGA-08-0386-01	5.438	-0.2328	-9.966	1.506	5.902	2.157	5.511	2.382	5.842
TCGA-43-3394-01	5.438	-0.6416	2.852	-0.5125	6.598	5.461	4.798	-9.966	0.3231
TCGA-IB-7885-01	5.438	-0.8863	6.012	-0.9971	5.62	5.574	4.975	0.0718	0.2998
TCGA-EA-A6QX-01	5.437	-3.171	6.308	1.221	6.586	6.413	5.939	2.452	1.766
TCGA-MJ-A68H-01	5.437	-9.966	4.572	0.679	5.784	5.433	4.506	2.514	1.566
TCGA-CR-6480-01	5.437	-9.966	-9.966	0.1257	5.728	4.016	4.487	-0.0574	0.8805
TCGA-DU-6405-01	5.436	-1.685	-9.966	0.8805	5.638	5.027	4.584	2.245	1.221
TCGA-EE-A2GP-06	5.435	0.2029	2.669	0.8961	6.553	6.086	5.659	2.611	2.716
TCGA-43-7656-01	5.434	0.044	4.495	1.647	6.721	5.939	5.355	0.7664	2.986
GTEX-OHPM-1826-SM-2YUNF	5.434	-1.595	-9.966	-0.9132	4.264	1.975	4.059	-9.966	3.416
TCGA-DX-AB2J-01	5.434	-3.816	6.408	1.221	5.587	5.622	5.164	2.177	0.4016
TCGA-EW-A6SC-01	5.434	-9.966	3.207	1.158	6.36	6.162	5.505	1.723	-9.966
GTEX-X4EO-2726-SM-4E3HS	5.433	0.1388	7.411	0.547	4.855	4.318	4.087	0.6608	0.5271
TCGA-D5-6898-01	5.433	-0.5332	-9.966	-0.4521	5.997	5.536	5.269	-1.639	-9.966
TCGA-FG-A70Z-01	5.432	-9.966	5.26	0.2881	5.151	5.317	4.865	0.8961	-9.966
TCGA-AC-A3W7-01	5.431	-1.181	3.532	1.656	6.343	4.886	5.305	-1.685	-0.1665
GTEX-ZZ64-0826-SM-5E449	5.431	-1.884	5.296	1.93	4.5	-9.966	4.363	-9.966	4.399
TCGA-LN-A4A4-01	5.43	0.2029	-9.966	-0.2671	4.114	-1.552	4.738	-2.114	5.705
TCGA-52-7810-01	5.43	-0.013	5.98	-0.9686	6.665	5.824	5.191	-0.0877	3.022
TCGA-BH-A1FB-01	5.43	-0.6193	3.854	-0.0725	6.075	5.617	4.882	-0.8339	1.967
TCGA-DZ-6135-01	5.43	-0.8599	1.864	-0.9406	5.256	4.287	3.917	-0.1828	0.0158
TCGA-58-8388-01	5.43	-9.966	-9.966	2.687	6.973	5.748	5.494	3.598	-9.966
TCGA-34-5232-01	5.428	-1.732	3.466	-0.1504	5.874	5.343	4.622	1.092	-0.9971
TCGA-4H-AAAK-01	5.428	-2.727	5.157	0.6969	5.782	5.408	5.412	-0.5125	3.213
TCGA-HE-A5NH-01	5.427	0.3231	3.583	0.03	5.8	5.026	4.525	-9.966	-9.966
TCGA-D8-A147-01	5.427	-0.7834	1.868	1.043	6.692	6.261	4.905	3.56	-9.966
TCGA-E2-A14V-01	5.427	-0.9132	5.262	0.4865	7.586	6.638	6.353	0.24	3.987
TCGA-D8-A27V-01	5.427	-1.938	3.787	0.605	6.978	6.339	6.438	-0.1504	2.609
TCGA-BH-A0B8-01	5.426	-0.9406	-9.966	-0.6193	5.195	4.99	4.796	1.368	-1.149
TCGA-D8-A1Y0-01	5.425	-0.1828	1.105	1.651	7.27	6.878	5.805	0.1903	1.158
TCGA-CV-7414-01	5.425	-1.149	3.693	-0.6193	5.858	5.5	4.752	0.4865	0.9191
TCGA-C5-A8XI-01	5.421	-0.394	5.899	1.804	6.517	6.646	5.807	2.563	0.5859
TARGET-50-PAKYFC-01	5.421	-1.355	5.441	2.524	7.069	6.761	6.758	5.148	4.169
TCGA-FS-A1YX-06	5.421	-2.114	2.354	0.1903	6.097	5.777	4.821	1.39	-9.966
TCGA-PL-A8LZ-01	5.42	-1.47	4.474	1.522	7.389	5.232	6.267	3.379	5.386
TCGA-B2-5639-01	5.42	-9.966	2.93	-2.114	5.145	5.322	4.833	-0.9406	-9.966
TCGA-GN-A264-06	5.419	0.03	-9.966	-0.2671	6.598	6.226	5.552	-0.7834	0.4447
TCGA-18-3408-01	5.418	0.9716	4.733	-0.0877	6.724	6.487	5.735	0.7058	-9.966
TCGA-AJ-A3BH-01	5.418	-0.1031	4.361	0.7832	6.247	5.396	4.713	1.791	0.3231
TCGA-G4-6588-01	5.418	-0.3022	1.406	0.3685	6.198	6.185	5.309	1.516	-0.0425
TCGA-DU-7012-01	5.418	-1.181	-9.966	0.1648	5.139	5.211	4.576	0.4233	0.0014
TCGA-EE-A2GN-06	5.417	0.517	2.806	0.7999	7.408	6.261	5.757	2.057	2.144
TCGA-E2-A15K-01	5.417	-0.4921	5.009	0.3115	6.966	6.582	5.874	0.8488	0.058
TCGA-BG-A3EW-11	5.417	-0.9406	6.804	-1.248	5.6	5.28	4.577	-9.966	2.135
TCGA-E9-A1N5-01	5.417	-1.884	3.779	0.9789	6.197	5.357	5.159	-9.966	-9.966
GTEX-13SLW-2826-SM-5Q5ES	5.416	-9.966	7.02	1.008	5.292	-9.966	4.586	-9.966	4.5
TCGA-BR-8297-01	5.415	-2.466	-9.966	-0.9132	6.067	2.157	5.202	0.4447	6.095
TCGA-F7-A620-01	5.413	-1.431	5.732	-0.6193	6.067	6.001	5.023	-0.0574	1.428
TCGA-BA-A4IF-01	5.412	-2.727	2.894	-0.0877	6.451	6.069	4.976	0.2522	-0.5973
TCGA-CV-5434-01	5.411	-0.1665	-2.178	0.9115	6.541	5.508	5.091	1.373	-9.966
TCGA-AR-A24V-01	5.411	-0.7108	4.268	-0.1187	6.434	5.521	5.254	0.6239	-0.013
TCGA-D8-A1X8-01	5.41	-0.8863	4.086	0.1776	6.912	6.078	5.622	0.8488	2.412
TCGA-EY-A2OP-01	5.409	-9.966	4.637	2.098	7.054	6.61	5.487	2.907	1.964
TCGA-BB-4227-01	5.408	0.9115	-9.966	0.4016	6.352	5.333	5.307	-0.7834	1.368
TCGA-B5-A3FA-01	5.408	-0.3201	5.388	0.5069	6.83	6.352	5.569	1.774	1.233
TCGA-TM-A84B-01	5.408	-0.7108	2.66	3.671	7.084	6.459	6.902	4.137	3.041
TCGA-D8-A1JJ-01	5.406	-2.635	3.984	1.112	7.721	6.911	6.081	0.6608	2.328
TCGA-IB-7887-01	5.405	-0.3022	5.166	-0.4521	5.855	5.402	5.104	-0.3752	-9.966
TCGA-TM-A84J-01	5.405	-2.315	3.996	2.37	6.502	4.64	5.649	3.747	4.074
TARGET-50-PALLFB-01	5.405	-2.388	5.727	3.446	7.216	6.289	6.903	5.576	6.298
TCGA-VQ-A8PP-01	5.404	0.4016	-9.966	-0.2845	4.644	-0.8863	4.775	0.3907	4.918
TCGA-3N-A9WB-06	5.404	-0.6873	6.576	1.6	7.134	6.647	6.22	2.449	1.727
TCGA-4Z-AA7Y-01	5.403	0.4233	4.873	0.346	6.054	5.777	5.657	0.9191	2.554
TCGA-BB-A5HY-01	5.403	-0.3752	5.326	1.532	6.755	6.586	5.615	2.501	-9.966
TCGA-29-1785-01	5.403	-0.5756	2.105	-0.2328	5.268	1.209	5.161	1.532	7.1
TCGA-D8-A1XY-01	5.403	-2.826	5.247	0.547	7.408	6.532	5.755	-0.4921	0.3573
TCGA-22-1011-01	5.402	-2.053	-9.966	0.2029	5.951	5.136	4.628	0.2998	1.05
TCGA-C8-A12P-01	5.402	-2.548	3.154	-0.0425	6.919	6.013	5.48	-0.5756	-0.0277
TCGA-DS-A3LQ-01	5.401	-0.6416	5.661	-0.6416	6.583	6.363	5.356	2.376	2.444
TCGA-MT-A67D-01	5.401	-1.355	5.753	-0.394	5.784	5.754	4.46	0.1648	-9.966
TCGA-E9-A1R5-01	5.4	-2.635	4.327	1.623	8.128	7.402	6.343	1.623	-9.966
GTEX-RU1J-0526-SM-46MUT	5.398	-0.4719	4.321	0.9789	4.002	1.919	4.25	-9.966	4.283
TCGA-21-5786-01	5.397	-0.6873	4.36	-0.0877	6.1	5.297	5.008	1.138	0.2277
TCGA-LP-A5U3-01	5.397	-1.086	4.861	0.2998	6.482	5.864	5.113	-9.966	0.4657
TCGA-HZ-8636-01	5.397	-1.51	3.242	0.24	5.86	5.594	4.687	0.4447	1.215
TCGA-DZ-6132-01	5.397	-3.171	2.236	-1.086	5.299	4.659	4.021	-9.966	-9.966
TCGA-E2-A15G-01	5.396	-2.548	4.115	1.824	7.152	6.299	5.645	-0.9406	2.623
TCGA-A2-A0SX-01	5.396	-2.932	3.557	0.4016	6.478	5.846	5.401	2.293	0.24
TCGA-DX-A8BU-01	5.394	-0.4521	1.888	-0.1031	5.745	5.163	4.86	1.892	-9.966
GTEX-ZPU1-1326-SM-57WE1	5.394	-1.355	4.456	0.434	5.022	-9.966	4.668	-0.9406	5.12
TCGA-AY-A69D-01	5.394	-1.392	-9.966	2.506	6.663	6.647	6.231	1.93	-0.7588
TCGA-AQ-A1H2-01	5.393	0.4125	2.563	-0.8599	6.199	5.359	4.778	-1.248	1.941
TCGA-2G-AAHC-01	5.393	-0.0877	-1.595	2.183	6.621	4.515	5.923	1.919	1.071
TCGA-DX-A48L-01	5.393	-0.8339	3.786	-0.0725	6.043	5.901	4.669	-0.6643	0.044
GTEX-WHWD-1026-SM-4OORZ	5.393	-9.966	4.89	0.2881	4.536	2.806	4.291	-0.8339	4.149
TCGA-A2-A0YE-01	5.392	0.6608	2.854	1.6	6.922	5.741	5.506	3.17	1.619
GTEX-13N11-1126-SM-5KM41	5.392	0.2277	5.527	0.6517	4.984	1.637	4.572	-9.966	4.912
TCGA-76-4927-01	5.392	-0.7588	4.815	1.19	5.564	0.6699	5.058	2.004	5.927
TCGA-VS-AA62-01	5.392	-2.727	3.794	0.1257	5.74	4.839	4.753	1.112	-9.966
GTEX-WEY5-1426-SM-4LMJ3	5.391	-0.1993	4.323	0.517	4.648	-9.966	4.429	-9.966	3.889
TCGA-64-1679-01	5.391	-0.7834	3.401	-0.394	6.191	5.618	4.814	-1.781	0.6332
TCGA-BT-A20N-01	5.391	-1.431	4.099	-0.5543	6.057	5.591	4.545	-1.026	-9.966
TCGA-D8-A1XU-01	5.391	-1.595	4.074	-0.0425	6.318	5.651	4.803	0.24	-9.966
GTEX-X62O-0826-SM-46MW8	5.39	-0.5756	5.836	-1.552	4.057	1.986	3.156	-9.966	3.167
TCGA-BH-A0B0-01	5.39	-1.732	5.424	0.7407	6.571	6.004	4.955	0.8568	-9.966
TCGA-KD-A5QU-01	5.389	-0.1187	5.64	0.8961	6.335	5.911	4.954	1.719	1.884
TCGA-FU-A5XV-01	5.389	-0.9406	4.69	0.3231	5.849	5.604	4.584	1.085	-9.966
TCGA-AN-A0AL-01	5.388	-1.51	4.551	-0.0574	6.557	5.241	4.577	-0.8339	-0.0277
GTEX-11EQ9-1526-SM-5PNY7	5.388	-1.781	5.334	1.417	4.84	1.215	4.475	-9.966	3.611
TCGA-BQ-5879-01	5.387	-0.4521	-9.966	-1.026	5.56	4.829	4.475	0.7579	1.164
GTEX-14AS3-0726-SM-5S2NY	5.386	-0.1345	5.289	-0.9686	5.396	-9.966	4.328	-9.966	3.5
TCGA-E5-A4TZ-01	5.386	-0.4921	4.835	1.561	5.873	5.938	4.519	-0.5543	0.6239
TCGA-37-A5EN-01	5.385	1.112	6.165	2.221	7.088	6.609	5.524	2.325	2.236
TCGA-A2-A25A-01	5.385	-0.6193	5.637	0.8164	6.651	6.306	5.733	0.8726	-9.966
TCGA-X6-A8C7-01	5.385	-1.552	3.032	1.923	6.312	5.9	5.77	0.4761	1.527
TCGA-AX-A3FS-01	5.385	-1.639	5.732	2.398	7.338	6.967	5.811	3.412	3.077
TCGA-CQ-A4CD-01	5.385	-3.308	5.657	0.4016	6.407	6.45	4.988	-0.0725	-9.966
TCGA-A8-A099-01	5.384	-0.1504	-9.966	0.1388	7.364	6.664	6.483	-0.8084	0.4761
TCGA-A2-A0YC-01	5.384	-1.149	4.164	0.4865	6.559	5.681	5.242	0.4233	1.774
GTEX-14DAQ-1626-SM-5S2R1	5.383	0.044	5.686	-0.5756	4.482	-9.966	4.401	-9.966	4.524
TCGA-BH-A0B2-01	5.383	-0.2845	3.925	0.8488	7.225	5.932	5.552	1.669	1.085
TCGA-F7-A61V-01	5.383	-1.026	6.041	-0.2328	6.1	5.989	4.761	-0.5756	-9.966
TCGA-CV-7409-01	5.383	-1.086	4.446	-1.392	6.3	5.863	5.067	-0.6193	0.9038
TCGA-BH-A0DQ-01	5.383	-1.51	5.85	0.5859	6.9	5.801	5.25	0.8082	0.2998
TCGA-J7-6720-01	5.383	-1.732	6.771	-1.552	5.437	5.509	4.436	0.5859	1.623
TCGA-EE-A3AH-06	5.382	-0.0725	0.1903	0.5271	6.695	6.192	5.463	0.24	-9.966
GTEX-WI4N-2426-SM-4OOSC	5.382	-1.056	6.946	0.1903	4.697	2.969	3.982	-9.966	2.836
GTEX-XUZC-0926-SM-4BOQF	5.382	-2.053	5.127	0.7748	5.14	-9.966	4.602	-9.966	4.633
TCGA-IB-AAUP-01	5.382	-9.966	4.339	-0.1031	5.22	5.371	4.555	-0.6416	-0.3201
TCGA-60-2715-01	5.381	-2.315	1.953	-0.2159	5.417	5.001	4.44	0.9642	-0.5973
TCGA-D8-A27F-01	5.38	1.043	-1.392	0.8327	6.206	5.985	5.758	1.964	0.679
TCGA-60-2720-01	5.38	-0.4921	7.523	0.1124	6.555	6.617	5.052	0.7916	-9.966
TCGA-3B-A9HQ-01	5.38	-9.966	3.756	-0.1031	5.496	3.682	4.755	2.266	0.1257
GTEX-YFC4-0008-SM-4RGM3	5.378	0.3346	-9.966	2.354	6.141	-9.966	5.737	-0.5973	5.17
TCGA-BH-A1EV-01	5.378	-0.0425	-0.2845	0.9935	6.82	6.576	5.315	0.9568	-0.3201
TCGA-XF-AAMY-01	5.378	-2.114	4.588	0.9419	6.056	6.107	4.93	-9.966	-9.966
GTEX-TKQ2-1226-SM-4DXSV	5.378	-9.966	5.065	1.373	3.918	1.571	4.248	-9.966	4.201
GTEX-139YR-1826-SM-5LZXA	5.377	-1.149	5.664	-0.1504	4.516	1.665	4.501	-0.0877	4.252
TCGA-FU-A3TQ-01	5.376	-0.0725	4.684	0.8726	6.028	5.299	4.494	0.3231	0.3231
TCGA-A3-3347-01	5.376	-0.5125	2.751	0.9862	5.602	4.947	4.249	-9.966	2.202
TCGA-BH-A0B1-01	5.375	-2.466	3.699	-0.0725	6.797	5.887	5.13	0.2998	3.326
TCGA-C5-A8YT-01	5.375	-2.727	4.318	1.491	6.449	6.081	6.079	3.146	0.0014
TCGA-BH-A0HI-01	5.374	-0.2845	4.89	-0.4521	6.816	5.811	5.352	-0.013	-0.394
TCGA-C8-A26V-01	5.374	-0.5125	-2.388	0.4447	6.846	6.152	5.978	1.362	0.6239
TCGA-24-1564-01	5.373	2.516	-9.966	0.2522	5.317	5.914	4.967	-0.2671	-9.966
TCGA-VQ-A924-01	5.373	0.5069	2.662	0.0718	5.277	-0.6873	5.575	1.423	6.711
TCGA-EE-A2MP-06	5.373	-0.7108	4.656	0.7407	6.757	6.539	5.65	2.339	2.785
TCGA-DX-A3UF-01	5.373	-1.47	5.271	0.537	6.035	5.361	4.713	2.85	0.2642
TCGA-IB-7647-01	5.373	-1.938	3.168	-0.8084	5.537	5.195	5.052	-1.248	-9.966
TCGA-92-7341-01	5.373	-9.966	3.981	0.4233	6.562	6.242	5.142	1.576	-0.1828
TCGA-L5-A8NW-01	5.371	0.7233	-9.966	0.605	4.636	-0.6873	4.765	0.605	5.779
GTEX-ZP4G-0726-SM-4WWF2	5.371	0.1903	2.696	1.84	4.993	1.05	4.806	-1.117	4.76
TCGA-56-A5DR-01	5.371	-0.9971	-0.8339	1.098	6.975	6.189	4.837	0.099	2.609
TCGA-C5-A8YQ-01	5.37	-0.2328	4.613	1.029	5.998	5.243	4.82	0.7146	-0.2498
GTEX-P78B-2526-SM-3P5ZY	5.37	-9.966	6.626	0.6145	5.43	-9.966	4.747	-9.966	5.199
GTEX-X15G-0926-SM-4PQZE	5.369	-9.966	3.891	0.4865	4.06	-9.966	4.23	-0.6193	4.315
TCGA-43-A475-01	5.368	-0.8863	4.415	1.202	6.017	5.808	5.101	2.186	1.455
TCGA-CR-6478-01	5.368	-1.181	-9.966	0.0158	5.982	5.386	4.418	1.125	-9.966
TCGA-AJ-A3NC-11	5.368	-2.466	6.29	0.2154	5.696	5.85	4.714	0.7832	2.217
GTEX-11GS4-1826-SM-5HL4T	5.368	-2.548	6.523	-0.1187	4.728	2.345	4.136	-0.5125	3.647
TCGA-F4-6703-01	5.367	0.547	0.4447	-0.0277	5.948	4.926	4.688	0.434	-9.966
TCGA-UZ-A9PZ-01	5.367	-1.086	7.369	-0.1345	4.333	4.669	4.695	-0.3022	-9.966
GTEX-YF7O-1626-SM-5IFII	5.367	-1.51	5.868	0.6517	3.98	-9.966	4.663	-9.966	4.723
TCGA-EE-A180-06	5.367	-2.727	-9.966	1.696	7.333	6.413	5.597	1.043	2.186
TCGA-CQ-5332-01	5.366	0.8805	-9.966	-0.4325	6.306	5.659	4.646	0.6332	-9.966
TCGA-BH-A0HY-01	5.366	-1.056	5.078	1.311	7.032	6.165	5.673	1.915	1.043
TCGA-DX-A6YT-01	5.366	-2.466	5.507	0.9642	6.209	5.633	5.254	1.766	1.401
TCGA-ER-A2NE-06	5.365	-0.6643	1.233	-0.5332	5.483	4.822	4.098	0.044	-9.966
TCGA-VS-A8Q8-01	5.364	-0.4719	7.452	1.19	5.784	5.58	4.875	1.808	-9.966
TCGA-C5-A8XJ-01	5.364	-0.6193	1.252	1.571	6.229	5.382	5.297	-1.026	0.5955
TCGA-D8-A1JH-01	5.364	-1.47	3.877	0.0718	6.127	5.333	4.422	-0.0277	0.517
TCGA-W5-AA2Z-01	5.364	-1.47	3.197	0.5568	6.705	5.342	5.884	1.532	3.084
GTEX-ZTPG-2026-SM-5O999	5.363	-0.0877	3.136	1.791	5.555	-9.966	5.286	-9.966	5.554
TCGA-CV-A45P-01	5.363	-0.7834	4.634	-0.6416	5.358	5.004	3.911	0.3573	-9.966
TCGA-AR-A1AJ-01	5.362	0.5069	2.874	0.7832	7.248	6.34	5.498	0.679	-9.966
TCGA-EA-A411-01	5.362	-1.732	6.118	1.215	6.457	6.024	5.407	0.1257	3.565
TCGA-LA-A7SW-01	5.361	0.7748	4.792	2.23	7.021	6.653	6.057	2.254	2.365
GTEX-TMMY-2226-SM-4DXTN	5.361	-1.884	5.779	0.8164	5.425	3.612	4.418	-9.966	4.524
TCGA-DA-A1HY-06	5.36	0.4447	4.356	-0.6193	5.876	5.093	4.445	1.373	-0.5973
TCGA-56-8304-01	5.36	0.4233	2.934	-0.2845	6.315	5.128	4.926	0.688	1.036
TCGA-VS-A8EK-01	5.36	-0.3201	4.38	1.674	6.159	5.661	5.25	-1.595	1.064
TCGA-F7-A623-01	5.36	-1.392	2.465	0.8805	6.093	6.205	4.853	0.7832	1.334
TCGA-BT-A0YX-01	5.359	-0.5125	4.249	-1.355	5.633	5.405	4.505	0.1776	-9.966
TCGA-2G-AAFJ-01	5.359	-1.392	3.754	2.519	6.699	5.071	5.776	1.971	2.316
GTEX-11DXX-1926-SM-5EGJK	5.358	-0.5756	5.492	1.145	5.177	0.7146	4.684	-9.966	4.297
TCGA-BQ-7061-01	5.358	-1.026	-9.966	-1.884	5.039	4.437	3.753	-0.3022	-9.966
TARGET-50-PAJNCZ-01	5.357	-2.315	5.468	2.611	6.795	6.522	6.604	5.277	3.809
TCGA-A1-A0SM-01	5.356	-0.7346	5.283	-0.6416	6.632	6.041	5.474	0.4233	0.517
GTEX-XMK1-1826-SM-4B66F	5.356	-1.026	5.315	0.5666	4.566	-9.966	4.194	0.1388	4.051
TCGA-EW-A1P4-01	5.355	-1.392	3.546	0.6332	6.595	5.519	5.049	1.585	1.085
TCGA-2H-A9GJ-01	5.353	-0.4921	-9.966	0.5069	4.263	-1.149	4.739	-0.2671	5.018
TCGA-BR-A4IY-01	5.353	-1.056	3.007	0.3907	4.917	-2.388	4.737	1.132	5.984
TCGA-90-7766-01	5.352	-0.4719	3.356	1.145	6.125	5.647	5.098	-0.4521	-9.966
TCGA-A2-A0CL-01	5.351	-0.5543	3.634	1.39	6.772	5.492	5.395	0.2998	-9.966
TCGA-DX-AB2F-01	5.351	-2.114	6.187	-0.1665	5.29	5.209	4.825	-9.966	-9.966
TCGA-CV-A6JZ-01	5.351	-2.548	5.012	-0.1828	5.768	5.948	4.563	-0.6193	0.2522
TCGA-AZ-6603-11	5.351	-2.727	2.148	-0.6873	5.797	4.152	4.43	-0.1993	-9.966
TCGA-2H-A9GN-01	5.35	0.2522	-9.966	1.293	5.714	1.633	6.057	2.308	7.01
TCGA-YH-A8SY-01	5.35	-0.9686	6.444	0.679	5.627	5.866	5.108	1.252	0.547
TCGA-AR-A24R-01	5.35	-1.355	3.484	0.605	7.053	5.811	5.104	1.183	1.299
TCGA-96-7545-01	5.349	0.1776	4.686	-2.114	6.155	6.347	4.891	-9.966	-9.966
TCGA-A8-A09G-01	5.349	-1.149	3.494	0.8246	7.037	6.111	5.701	-0.4325	0.1519
GTEX-13U4I-2626-SM-5SI9C	5.349	-1.318	6.906	1.501	4.988	1.029	4.491	-0.7108	4.968
TCGA-18-3409-01	5.349	-1.47	4.517	-0.6416	6.308	5.89	4.964	0.1776	-9.966
TCGA-86-7953-01	5.348	-0.5756	3.749	0.4865	5.409	5.051	5.04	-9.966	4.813
TARGET-50-PAJLKC-01	5.347	-0.7108	4.75	3.884	7.435	7.36	7.359	6.492	3.032
TCGA-DX-A3LT-01	5.347	-0.9686	7.016	-1.431	6.421	6.142	5.164	2.236	0.1257
TCGA-22-4604-01	5.346	-0.9971	-0.8084	0.6608	5.833	5.563	4.505	-0.0277	0.3231
TCGA-G7-A8LE-01	5.346	-1.431	4.758	0.6239	5.095	4.167	4.532	-9.966	2.571
TCGA-CR-6484-01	5.346	-1.685	-9.966	-0.394	5.635	4.831	3.944	-1.552	-9.966
TCGA-2G-AAG6-01	5.346	-9.966	3.957	1.132	5.47	3.959	5.233	2.59	-9.966
TCGA-BR-7959-01	5.346	-9.966	-9.966	-1.47	4.68	2	4.465	0.0854	4.517
TCGA-CD-8535-01	5.345	-0.1187	-9.966	0.3907	5.612	0.6239	5.06	1.379	5.834
TCGA-BB-4217-01	5.344	0.0014	-9.966	-0.6873	5.506	5.26	4.537	1.537	0.2029
TCGA-CD-A489-01	5.344	-1.086	5.438	0.1648	5.333	-0.4921	4.845	0.9268	6.745
GTEX-12WSL-1626-SM-5GCMU	5.344	-1.283	5.412	1.27	4.709	-9.966	4.549	-0.6643	4.522
TCGA-2H-A9GF-01	5.343	0.9568	-9.966	0.6425	4.998	1.701	5.447	1.373	5.354
TCGA-85-A4JC-01	5.343	0.5666	5.46	0.5666	5.964	5.718	4.755	-1.181	1.465
GTEX-XYKS-0226-SM-4BRW3	5.343	-1.47	3.686	0.6239	4.03	-9.966	3.826	-9.966	3.86
GTEX-ZA64-1426-SM-5CVMC	5.343	-2.053	4.509	1.008	4.662	0.9191	4.17	-9.966	4.189
TCGA-HU-A4GH-11	5.342	-0.6193	0.7233	-0.7588	4.72	0.3685	4.216	-1.994	5.691
TCGA-PN-A8MA-01	5.342	-1.938	6.589	1.799	6.92	5.01	5.674	2.125	3.665
TCGA-BT-A20X-01	5.341	-0.1504	4.954	-0.3752	6.116	5.983	4.931	-0.2159	-9.966
TCGA-B8-5158-01	5.34	-1.181	-9.966	-1.248	5.853	4.536	4.388	0.2642	-9.966
TCGA-EK-A2PI-01	5.34	-1.994	7.232	1.923	6.701	6.59	5.275	1.701	3.819
TCGA-CR-7391-01	5.339	-0.8863	-9.966	-2.245	5.144	2.901	3.585	-9.966	0.4016
TCGA-E2-A1L9-01	5.339	-2.178	5.963	-0.3752	7.182	6.989	5.752	-2.053	2.37
TCGA-DX-A8BG-01	5.339	-2.635	4.49	0.4865	5.876	4.881	4.514	1.288	0.5568
GTEX-1399R-0726-SM-5KM2A	5.338	-1.117	4.935	-0.3022	4.215	-9.966	4.432	-0.4131	4.268
TCGA-BB-4228-01	5.337	0.0854	-9.966	-1.117	5.899	5.409	4.294	1.449	-0.9132
TCGA-85-8287-01	5.337	-0.2845	-0.2498	0.2154	5.715	5.132	4.097	1.311	-0.3022
TCGA-E2-A1IG-01	5.337	-0.4921	4.247	0.4447	6.72	5.44	5.189	-1.117	-0.0725
TCGA-CN-6021-01	5.337	-0.9406	-9.966	-0.6193	6.124	5.176	4.64	0.9493	0.605
TCGA-G3-AAV7-01	5.337	-9.966	5	1.151	7.252	6.104	5.982	0.6332	1.651
TCGA-D3-A51R-06	5.336	-0.2845	5.163	4.972	8.048	7.586	6.797	6.607	5.474
GTEX-ZAB5-1026-SM-5HL91	5.336	-2.114	5.21	-0.4921	4.033	1.064	4.336	-9.966	4.142
TCGA-FB-A7DR-01	5.334	-0.5973	4.887	0.1388	5.653	4.9	4.777	-1.639	-9.966
TCGA-CV-A6JY-01	5.334	-1.51	2.478	-0.8339	5.25	4.611	3.962	-9.966	-9.966
TCGA-56-7730-01	5.333	-0.9686	5.661	1.417	6.398	5.818	5.324	1.571	4.164
TCGA-IB-7888-01	5.333	-2.388	4.42	-0.5125	5.711	4.89	5.079	-0.5125	2.751
TCGA-46-3766-01	5.333	-9.966	3.023	-2.932	5.464	4.845	4.224	-9.966	-9.966
TCGA-CR-7374-01	5.332	-9.966	-9.966	1.264	6.623	4.318	5.017	-1.831	1.868
TCGA-22-4609-01	5.331	0.2998	-9.966	0.1519	5.502	4.344	4.448	0.8408	2.202
TCGA-24-1463-01	5.331	-1.552	-9.966	0.9191	5.815	4.938	4.828	2.248	2.628
TCGA-F4-6805-01	5.331	-2.315	1.99	-0.8863	6.725	6.029	5.309	1.317	-9.966
TCGA-EA-A50E-01	5.33	-0.4921	6.013	-0.1828	6.278	5.839	4.473	0.5271	2.144
TCGA-BR-8365-01	5.33	-1.51	-9.966	-0.7588	4.88	1.015	4.919	-2.053	5.42
TCGA-D7-8579-01	5.33	-9.966	-9.966	0.0854	4.276	0.0014	4.065	-9.966	2.623
TCGA-A2-A0EM-01	5.329	-3.047	4.743	0.0718	7.07	5.58	6.238	-0.6873	0.9191
TCGA-18-3407-01	5.328	0.6239	3.592	0.03	6.426	5.816	4.988	-0.1993	0.3573
TCGA-C9-A47Z-01	5.327	0.03	2.452	-0.7588	5.114	4.621	3.422	-0.0277	-9.966
TCGA-06-0125-02	5.327	-0.8863	-9.966	-0.9971	4.824	1.322	4.803	0.058	4.164
TCGA-BB-7864-01	5.326	0.1776	3.165	0.03	6.287	5.789	5.075	1.008	0.2154
GTEX-Y114-1526-SM-4TT79	5.326	-1.595	4.928	1.551	4.895	-9.966	3.837	-0.8339	3.986
TCGA-CN-4735-01	5.325	0.6332	2.609	0.5568	6.746	5.614	4.928	0.8805	0.8082
TCGA-CR-6487-01	5.325	-0.7108	-9.966	-1.248	5.538	5.02	4.399	0.058	0.24
TCGA-CV-A45V-01	5.324	-0.2328	3.103	-1.214	5.09	4.358	3.402	-9.966	-9.966
TCGA-E2-A1IN-01	5.324	-2.727	5.93	0.6699	7.124	6.899	6.167	-9.966	1.434
TCGA-CN-A63W-01	5.323	0.0158	6.272	0.517	6.03	6.045	4.745	0.24	-0.0725
TCGA-76-4928-01	5.322	-0.4521	5.184	0.1903	5.549	2.074	5.598	1.787	5.94
TCGA-CC-5263-01	5.321	-1.056	-9.966	-0.1345	6.082	5.177	5.001	-1.994	1.264
GTEX-T5JW-1526-SM-4DM5E	5.32	-1.639	4.995	1.66	5.253	-9.966	4.648	-9.966	4.487
TCGA-DX-A8BV-01	5.319	-0.3566	5.639	0.4447	5.938	5.314	4.769	1.516	-0.0425
GTEX-ZVT2-0426-SM-5E44S	5.319	-1.831	3.825	2.157	5.294	2.764	5.03	-9.966	5.044
TCGA-3U-A98G-01	5.319	-2.388	4.253	-0.8339	4.885	4.649	3.879	-0.2671	-0.394
TCGA-DC-6158-01	5.319	-9.966	-9.966	0.2762	6.515	5.876	4.949	1.385	1.481
TCGA-D6-A6EQ-01	5.318	0.03	8.203	-0.3022	6.114	6.036	5.309	-0.1828	4.291
TCGA-44-7669-01	5.318	-0.5756	0.2881	2.177	7.032	6.129	5.393	3.211	1.334
GTEX-XUJ4-2126-SM-4BOOX	5.318	-9.966	5.034	1.258	4.441	-9.966	4.164	-0.3752	3.996
GTEX-PWN1-0008-SM-48TEA	5.318	-9.966	-9.966	1.368	5.851	0.8961	5.378	0.1519	5.415
TCGA-2J-AABA-01	5.317	-0.5543	6.069	0.517	5.339	4.548	4.658	-9.966	-3.816
TCGA-66-2755-01	5.316	-0.8863	2.521	1.334	6.969	6.188	5.397	2.447	1.334
TCGA-86-8055-01	5.315	-0.5973	0.4552	-0.5332	5.738	5.506	4.786	0.9115	-9.966
TCGA-CV-7424-01	5.315	-1.056	5.4	0.058	5.957	5.815	4.465	1.795	-9.966
TCGA-CV-6937-01	5.314	-0.7588	4.072	-0.1993	6.298	5.917	5.082	-9.966	-9.966
GTEX-XV7Q-1026-SM-4BRVR	5.314	-0.7834	5.581	-0.2845	5.109	-9.966	4.326	-0.3566	2.913
TCGA-BH-A0BV-01	5.314	-2.548	2.491	-0.3383	7.031	5.78	5.315	1.506	-9.966
TCGA-IB-7645-01	5.314	-9.966	4.212	0.2998	5.809	5.235	5.187	-0.0277	-9.966
TCGA-FS-A1ZQ-06	5.313	1.029	-9.966	-0.4131	6.216	5.682	4.929	0.3573	1.701
TCGA-CV-7250-01	5.313	0.2998	2.846	-0.9971	6.478	4.769	4.959	1.078	1.001
TCGA-CQ-5329-01	5.313	-1.831	-9.966	-0.7834	5.943	5.456	4.526	-0.8084	-9.966
TCGA-FU-A3TX-01	5.313	-2.466	4.557	1.118	6.478	5.839	5.28	2.536	1.132
TCGA-EB-A4IQ-01	5.312	-0.6193	3.859	1.008	5.93	5.491	4.507	0.24	1.164
TCGA-CR-6472-01	5.312	-0.6416	5.111	0.8164	7.671	7.332	6.224	1.619	1.628
TCGA-CV-5441-01	5.312	-2.053	4.865	-0.4921	5.742	5.236	4.186	1.239	-9.966
TCGA-TS-A7P1-01	5.31	-0.3383	4.55	0.1648	5.925	5.083	4.949	1.637	-9.966
TCGA-CN-6988-01	5.31	-0.4131	1.379	-0.1665	5.613	4.903	4.332	-1.595	-9.966
TCGA-25-1316-01	5.309	-0.8863	0.7579	0.9935	7.973	1.357	7.395	2.747	4.966
TCGA-BQ-7060-01	5.309	-0.9686	-9.966	-2.245	4.385	4.12	3.625	-9.966	-0.5332
TCGA-A2-A0CZ-01	5.309	-9.966	5.053	-1.318	5.659	4.774	4.865	-9.966	3.03
TCGA-IB-A5SS-01	5.308	-1.392	4.808	-0.8339	5.832	5.284	4.832	0.1388	-9.966
TCGA-85-8580-01	5.307	0.2277	3.588	2.057	6.464	6.021	5.014	2.281	3.041
GTEX-12WSK-0626-SM-5LZUJ	5.307	-0.5756	-9.966	-1.831	3.247	-9.966	3.2	-9.966	3.558
TCGA-B8-5545-01	5.307	-1.51	1.997	-4.293	5.534	5.434	4.912	-0.6416	-9.966
TCGA-A8-A08S-01	5.307	-3.047	3.947	0.5568	6.516	5.606	5.56	1.561	0.5271
GTEX-OHPL-2526-SM-3MJGT	5.306	0.3685	5.261	2.018	6.023	-9.966	5.566	0.1124	5.55
TCGA-D5-6539-01	5.306	0.2277	-9.966	0.0854	6.282	5.06	4.886	-9.966	-9.966
TCGA-C5-A7X3-01	5.306	0.1388	6.136	1.125	6.007	5.964	5.521	1.766	-9.966
TCGA-XF-A9SK-01	5.306	-0.1504	6.982	1.423	6.333	4.807	5.181	0.1648	4.74
TCGA-05-4432-01	5.306	-0.5543	3.644	1.132	6.232	6.035	5.356	2.6	0.8568
TCGA-J1-A4AH-01	5.306	-0.7346	2.854	1.71	5.832	5.705	4.838	1.696	1.692
TCGA-NC-A5HP-01	5.305	-0.1345	5.769	2.091	6.952	6.859	5.539	0.7832	1.19
TCGA-C8-A12W-01	5.305	-1.431	-9.966	0.547	6.102	5.601	4.532	0.8327	3.265
TCGA-FL-A1YG-11	5.305	-3.458	6.055	-0.6873	5.798	5.654	4.799	0.1124	-9.966
GTEX-YJ8A-0426-SM-5IFID	5.304	1.281	4.868	1.183	4.367	0.4967	4.196	-9.966	4.428
TCGA-FG-A4MU-01	5.304	-0.5332	3.568	0.7146	5.405	5.353	4.451	0.3231	0.7999
TCGA-E7-A6MF-01	5.304	-1.51	0.688	0.099	5.348	5.271	4.59	-1.431	0.7321
TCGA-D8-A1XD-01	5.304	-9.966	-1.732	1.732	6.639	5.684	4.991	1.328	1.619
TCGA-60-2721-01	5.303	-0.8339	-9.966	1.209	6.56	5.674	5.028	-0.6416	-0.6873
GTEX-13CF3-1426-SM-5K7YY	5.303	-2.053	4.552	1.227	4.759	1.945	4.611	-9.966	4.537
TCGA-EE-A3AB-06	5.302	0.1648	4.001	1.305	7.287	6.369	5.589	2.866	4.471
TCGA-ZJ-A8QQ-01	5.302	-1.431	5.58	1.546	6.01	5.769	5.339	0.4447	-9.966
GTEX-S341-1426-SM-4AD6U	5.301	-2.114	5.4	1.233	4.632	-9.966	4.402	-9.966	4.937
TCGA-DX-A8BX-01	5.301	-2.178	5.597	-0.3022	5.812	5.084	4.652	0.8246	0.4761
TCGA-D3-A8GM-06	5.299	-0.4921	-9.966	1.092	5.949	4.881	5.252	0.9642	0.0854
TCGA-96-8170-01	5.299	-0.5756	3.783	0.6517	5.962	5.269	4.615	0.0854	0.688
GTEX-XMD3-0008-SM-4AT4V	5.298	-1.595	-9.966	1.098	5.638	-9.966	5.075	-9.966	5.223
GTEX-ZG7Y-1826-SM-4WWD3	5.297	-0.8084	6.253	-0.6643	4.846	1.334	4.57	0.8327	3.997
TCGA-UC-A7PF-01	5.297	-1.994	5.591	-0.1031	5.998	5.674	5.1	0.5568	1.876
TCGA-63-A5MR-01	5.296	0.9191	3.705	1.683	6.419	5.752	5.068	1.098	0.2154
TCGA-D8-A27M-01	5.296	-1.181	-9.966	0.2762	5.613	4.593	4.47	0.9038	0.4233
TCGA-ZN-A9VW-01	5.296	-1.47	4.684	1.609	7.039	6.576	6.138	4.313	1.516
GTEX-P4PP-0726-SM-3NM9S	5.295	-0.5756	5.416	0.4447	4.762	2.625	4.208	-9.966	3.565
TCGA-EB-A3XF-01	5.295	-1.056	4.62	0.8726	5.948	6.38	5.272	1.501	-0.3201
TCGA-C5-A905-01	5.295	-1.431	5.74	1.281	6.197	5.638	5.385	2.23	-9.966
TCGA-CM-6675-01	5.294	0.099	3.278	0.5859	6.092	6.088	5.137	1.406	-9.966
TCGA-66-2790-01	5.294	-0.6643	-9.966	0.7999	6.569	5.342	4.998	0.3573	-0.5125
TCGA-HS-A5N7-01	5.294	-1.086	5.869	1.556	5.212	4.584	3.636	3.123	3.057
TCGA-B9-4113-01	5.294	-3.308	5.544	1.196	5.073	4.471	3.565	-9.966	0.1124
TCGA-CM-5861-01	5.292	-0.5332	5.817	0.0854	6.747	6.885	5.656	1.585	-9.966
TCGA-C5-A1ML-01	5.292	-0.7834	4.735	1.623	6.854	6.028	5.432	2.033	1.551
TCGA-BP-4760-01	5.292	-9.966	0.1257	-0.3201	5.727	5.236	4.581	-1.781	-9.966
TCGA-A8-A096-01	5.291	1.015	-9.966	-0.0425	6.173	5.004	5.053	-0.6873	-9.966
TCGA-C5-A2LV-01	5.291	-0.3022	6.853	-0.4719	6.3	6.241	5.202	1.39	2.561
TCGA-HZ-7919-01	5.291	-0.9132	5.177	-0.6643	5.499	5.184	5.455	-0.7108	-9.966
TCGA-JX-A3Q0-01	5.291	-1.149	5.353	-0.2845	6.021	5.596	5.061	0.2522	0.1519
TCGA-DW-7838-01	5.291	-1.431	4.741	-0.2845	5.106	5.213	4.815	-0.0425	0.7321
GTEX-WFG7-0008-SM-4LMKB	5.29	0.4016	-9.966	1.406	5.5	0.6145	5.425	0.5763	5.722
GTEX-PX3G-0726-SM-48TZT	5.29	0.3685	5.057	0.1388	4.238	-9.966	3.951	-9.966	4.496
TCGA-A4-7288-01	5.29	-0.5332	-9.966	-1.431	4.53	4.485	4.598	-9.966	-9.966
TCGA-NA-A4R1-01	5.29	-0.6193	-9.966	2.48	7.585	7.371	5.938	4.731	1.732
GTEX-13S86-0326-SM-5SI6K	5.288	-1.831	3.603	-0.5543	4.633	1.84	4.128	0.346	3.614
TCGA-XE-AANI-01	5.288	-1.938	4.869	2.319	6.8	4.169	6.118	3.375	3.623
TCGA-BL-A13J-11	5.288	-2.053	5.002	-1.781	5.089	4.717	3.498	-9.966	-9.966
TCGA-QK-A652-01	5.288	-2.388	5.127	0.8327	5.513	5.479	4.384	0.4967	1.576
TCGA-AX-A3FZ-01	5.288	-3.816	6.758	2.033	6.907	6.171	5.565	4.202	4.265
TCGA-BH-A0BO-01	5.287	-0.3201	3.444	1.043	6.519	5.672	4.851	-9.966	-0.4719
GTEX-11DXY-1526-SM-5H129	5.287	-0.7346	6.73	0.1124	4.856	2.729	4.426	-9.966	2.576
TCGA-NC-A5HM-01	5.286	0.8488	6.3	1.171	6.647	6.276	5.579	2.287	2.725
TCGA-BA-A6DD-01	5.286	-1.47	5	-1.318	6.042	5.885	4.536	-1.392	0.0158
TCGA-55-7816-01	5.286	-1.781	3.816	-0.394	5.344	5.42	4.446	0.3115	1.258
GTEX-PX3G-2026-SM-48U1H	5.285	-1.51	5.238	1.997	5.569	-9.966	5.267	-9.966	5.278
TCGA-A2-A0YL-01	5.284	0.099	3.338	0.8246	6.909	5.65	5.766	-0.2671	1.138
TCGA-BH-A1FE-01	5.284	-0.5973	3.541	0.0718	6.607	6.041	5.215	-1.685	-0.4521
TCGA-AO-A124-01	5.283	-0.4921	-9.966	1.008	6.956	6.253	5.506	2.105	0.6608
TCGA-FD-A3SQ-01	5.282	0.434	4.835	-0.5756	5.385	5.14	4.15	-9.966	-9.966
TCGA-E2-A15P-01	5.282	0.2762	3.343	0.2998	6.457	4.62	4.602	-9.966	-0.1345
TCGA-CV-6960-11	5.282	0.2029	-9.966	-2.114	5.467	4.558	4.091	-1.318	-9.966
TCGA-EE-A2GO-06	5.282	0.0158	-9.966	-0.5125	6.565	5.984	5.478	-0.7346	1.196
TCGA-BH-A0EI-01	5.282	-0.1828	4.128	-0.7588	6.176	4.785	4.407	0.2998	0.1776
GTEX-W5X1-0008-SM-4LMKA	5.282	-0.5756	-9.966	0.7664	5.2	0.7999	5.29	-9.966	5.03
TCGA-BH-A0DP-01	5.282	-0.7588	5.1	0.9115	7.188	6.543	5.937	0.4233	0.688
TCGA-A3-3378-01	5.281	-0.1993	-9.966	-0.2845	5.046	3.823	3.561	-1.552	-0.3566
TCGA-76-4925-01	5.281	-0.3201	4.835	1.696	5.893	1.651	5.636	2.742	5.988
TCGA-A8-A084-01	5.281	-0.8863	4.889	1.979	8.133	6.059	6.174	1.623	3.149
GTEX-Y8LW-1226-SM-4WWDP	5.281	-1.781	4.611	-0.5973	4.811	-9.966	4.463	-0.1993	3.985
TCGA-XM-A8RG-01	5.281	-2.727	-9.966	0.24	6.182	5.297	5.51	1.233	-9.966
TCGA-BH-A0HK-11	5.281	-9.966	5.368	-0.8339	6.236	4.493	4.76	-9.966	3.369
TCGA-FD-A5C0-01	5.28	-0.7346	5.286	0.0158	6.09	5.635	4.584	-0.9132	-9.966
TCGA-A8-A07C-01	5.28	-1.117	4.286	2.141	8.024	6.513	6.638	3.65	4.834
TCGA-38-6178-01	5.28	-9.966	1.605	1.245	6.077	5.168	5.181	1.281	2.135
TCGA-CV-A6JU-01	5.279	0.9642	7.239	0.547	7.078	7.18	5.408	0.3231	3.844
TCGA-2G-AAGV-01	5.279	-0.9971	5.786	0.1903	5.748	4.517	5.182	0.6145	3.379
TCGA-A8-A09R-01	5.279	-1.318	-0.0425	0.8726	6.852	5.377	5.907	0.5955	3.516
TCGA-JW-AAVH-01	5.279	-3.047	5.892	1.043	5.947	5.562	4.99	-9.966	1.19
TCGA-A8-A09A-01	5.278	-0.7588	3.448	0.4865	7.089	5.011	5.034	-9.966	2.761
TCGA-AN-A041-01	5.278	-1.181	3.478	0.3796	7.013	5.838	5.65	-9.966	-9.966
TCGA-3A-A9IB-01	5.277	-1.51	5.47	-1.086	5.613	5.29	4.59	-0.2159	-9.966
TCGA-2G-AALZ-01	5.277	-2.826	6.547	0.9419	5.599	4.455	5.032	0.3907	4.11
TCGA-R6-A8W5-01	5.276	-0.7588	-9.966	-0.3022	4.252	-0.394	4.845	0.688	5.577
TCGA-BP-4973-01	5.276	-1.355	-9.966	0.0158	5.379	5.109	4.407	-0.1828	-0.6193
TCGA-92-8064-01	5.275	-0.0277	-9.966	0.3685	5.959	5.233	4.428	-9.966	-9.966
TCGA-24-2262-01	5.275	-0.5543	0.9343	0.6517	4.439	-9.966	4.883	0.8327	5.793
TCGA-BH-A0C3-01	5.275	-2.466	-9.966	0.6608	6.845	5.543	4.734	-9.966	0.605
TCGA-24-2289-01	5.274	-1.392	-9.966	0.4865	4.262	-1.595	4.102	0.8805	5.399
TCGA-EY-A2OO-01	5.274	-2.635	5.677	2.755	6.714	6.933	5.614	3.281	2.018
TCGA-3H-AB3T-01	5.273	-0.2671	4.348	1.705	6.99	6.266	5.983	3.874	2.074
TCGA-24-1550-01	5.272	-0.013	-9.966	-0.1665	6.045	4.273	5.501	1.245	5.317
TCGA-DS-A5RQ-01	5.271	0.3907	6.398	-0.2671	5.683	5.836	4.524	1.357	-9.966
TCGA-56-7221-01	5.271	-0.1345	4.21	0.1519	6.1	5.914	5.289	-1.181	1.145
TCGA-VQ-AA68-01	5.271	-0.3752	-9.966	-0.0725	4.874	1.27	5.415	-1.431	5.287
TCGA-D8-A27I-01	5.271	-1.318	3.501	0.7916	6.6	6.08	5.706	-0.0574	2.504
TCGA-FP-8210-01	5.271	-9.966	-9.966	0.5666	5.254	0.2522	4.424	-0.394	4.16
TCGA-WS-AB45-01	5.269	-0.4131	-9.966	-0.7346	5.753	3.269	5.02	0.9716	1.799
TCGA-GD-A3OS-01	5.269	-0.6643	4.215	2.653	7.274	6.764	6.383	3.233	5.17
TCGA-AR-A24Q-01	5.268	-1.117	4.018	-0.3201	6.371	5.494	4.759	1.078	0.8647
GTEX-Z93S-2626-SM-57WBX	5.268	-2.114	7.664	0.2029	4.056	3.647	3.963	-9.966	3.751
TCGA-A2-A0EO-01	5.266	-1.181	5.687	-0.5543	6.598	5.162	6.151	-0.0725	2.926
TCGA-BH-A28Q-01	5.266	-1.181	2.862	0.9716	7.135	6.103	6.83	0.2154	1.164
TCGA-A1-A0SE-01	5.266	-1.51	3.398	0.9343	7.62	6.033	5.73	1.633	1.345
TCGA-HU-A4GU-01	5.266	-1.685	-9.966	-0.1187	4.66	-0.3566	4.541	1.705	5.676
TCGA-D1-A3DH-01	5.266	-2.826	4.826	1.481	7.518	6.939	5.841	2.696	0.2154
TCGA-BH-A1F2-01	5.266	-9.966	6.234	-0.4719	7.604	6.74	5.932	-9.966	2.488
TCGA-CN-6995-01	5.265	0.3796	4.336	-1.781	6.27	5.62	4.789	-0.5973	0.679
TCGA-37-A5EM-01	5.265	0.1519	5.105	2.095	7.284	6.747	5.875	1.93	3.256
TCGA-IC-A6RF-01	5.265	-0.1828	-9.966	0.9343	5.116	1.001	5.372	-0.3383	5.333
TCGA-A2-A1FX-01	5.265	-0.3022	2.953	0.8408	7.087	6.604	5.622	0.1648	2.554
TCGA-18-4721-01	5.264	-0.8339	-9.966	-0.7588	6.135	5.575	4.573	-9.966	-9.966
TCGA-Y8-A897-01	5.264	-1.248	5.504	-0.1993	5.401	4.556	4.455	-0.3566	2.239
GTEX-R55G-1126-SM-48FDG	5.262	0.0718	4.568	1.406	4.884	2.521	4.963	1.614	2.714
TCGA-B6-A0WT-01	5.261	0.2642	4.237	0.9493	6.726	5.472	5.672	0.7832	2.58
TCGA-A4-A5Y1-01	5.261	-0.1993	2.433	0.679	6.403	5.955	4.666	0.9642	-9.966
TCGA-BH-A0BC-01	5.261	-0.5332	4.055	0.1124	6.926	6.066	5.42	-9.966	-9.966
TCGA-D3-A2JA-06	5.26	-0.2328	4.945	1.05	6.404	6.374	4.976	2.325	3.309
TCGA-EB-A44N-01	5.26	-0.5125	4.462	1.82	6.784	6.3	5.974	2.595	1.057
TCGA-DX-A240-01	5.26	-1.214	5.983	-0.8084	5.316	5.506	4.727	1.001	-9.966
TCGA-OR-A5KX-01	5.26	-1.355	7.663	0.7233	5.98	5.583	4.315	0.1776	0.058
TCGA-2G-AAG5-01	5.259	-1.831	2.911	0.5955	3.709	4.043	4.369	2.511	-9.966
TCGA-G7-6792-01	5.258	-0.5756	-0.3383	-0.8339	5.398	4.813	4.379	-0.9971	0.058
TCGA-A2-A4S3-01	5.258	-1.117	1.934	0.8961	6.618	5.933	5.042	0.6145	0.1124
TCGA-LP-A4AX-01	5.258	-1.781	5.65	1.86	6.879	6.164	5.209	1.605	4.085
TCGA-39-5039-01	5.257	0.9115	3.802	-2.727	5.893	5	4.401	-0.8339	-9.966
GTEX-13OVI-2126-SM-5KM3U	5.257	-0.4521	2.585	1.595	4.243	0.517	4.318	-9.966	2.011
TCGA-VQ-A91Q-01	5.257	-0.5543	1.293	0.099	4.584	-1.552	4.768	0.3115	5.489
TCGA-IG-A5S3-01	5.257	-1.056	0.7916	1.6	5.779	-0.3201	6.083	2.193	6.915
TCGA-A7-A4SC-01	5.257	-1.938	-9.966	1.88	6.317	5.483	4.985	-9.966	-9.966
TCGA-B9-A5W7-01	5.256	-0.1828	5.589	-1.056	5.501	5.179	4.766	0.9568	1.264
TCGA-IQ-A61H-01	5.255	0.1388	5.001	1.74	7.393	7.395	5.825	1.125	-0.3022
TCGA-BT-A20V-01	5.255	-0.8863	4.97	1.043	6.664	6.307	5.139	0.2522	2.949
TCGA-AN-A0XN-01	5.254	0.1776	4.491	1.043	7.2	5.257	5.137	-9.966	-9.966
TCGA-26-5139-01	5.254	-0.2671	5.035	0.4865	5.436	1.481	5.175	2.23	5.3
TCGA-BH-A0E9-01	5.254	-0.6416	4.05	0.7579	6.942	6.211	5.326	-0.4921	0.0854
GTEX-R55G-0526-SM-2TC5O	5.254	-1.248	2.846	0.0158	3.767	0.6239	4.164	-1.214	4.258
TCGA-EW-A1P5-01	5.254	-1.552	-9.966	0.8568	6.952	6.229	5.464	1.27	0.0718
TCGA-B6-A0IC-01	5.253	-0.3566	2.971	0.9343	6.27	5.255	5.142	-0.2671	2.151
TCGA-LL-A5YP-01	5.253	-1.117	5.214	0.4761	6.034	5.863	5.253	0.6239	1.357
TCGA-EY-A54A-01	5.253	-1.283	5.821	2.011	7.147	6.871	5.631	3.263	2.669
TCGA-AU-6004-01	5.253	-1.831	0.2154	0.2998	5.794	5.081	4.987	0.8961	1.008
GTEX-WXYG-1326-SM-4ONCN	5.253	-1.994	4.104	1.328	5.51	-9.966	4.526	-9.966	2.832
GTEX-PWOO-1726-SM-48TDC	5.253	-9.966	4.769	1.884	4.964	1.787	4.935	-9.966	5.161
TCGA-A4-8310-01	5.252	-2.548	3.918	0.1388	5.965	4.929	4.48	1.299	-9.966
TCGA-BH-A0BV-11	5.252	-2.727	3.729	0.4761	5.981	4.614	4.655	-1.884	1.828
TCGA-Z6-A9VB-01	5.252	-3.047	-9.966	0.5666	4.953	-0.9971	5.46	1.258	6.477
TCGA-43-6143-01	5.25	0.4657	-9.966	3.011	7.935	7.044	6.401	2.768	2.725
TCGA-D5-6931-01	5.25	0.03	-9.966	1.258	6.076	5.261	5.329	0.6517	-9.966
TARGET-50-PAKMUB-01	5.25	-2.114	7.472	1.6	7.092	7.082	6.68	4.011	0.6699
GTEX-RU72-0326-SM-2TF5T	5.249	-0.6416	5.393	-1.181	4.129	-9.966	3.584	-9.966	2.895
TCGA-GM-A2DL-01	5.248	-0.394	5.918	-0.0725	6.011	5.593	5.047	-1.732	4.426
TCGA-2G-AAL5-01	5.248	-0.5543	5.715	3.713	7.398	5.277	6.795	5.016	5.655
TCGA-B9-7268-01	5.248	-1.552	3.48	-1.595	5.034	4.363	4.357	-0.4131	-9.966
TCGA-IB-7652-01	5.247	-0.8863	-9.966	-1.938	5.199	4.898	4.617	-1.086	-9.966
TCGA-66-2782-01	5.246	-0.5125	-9.966	0.517	6.646	6.182	5.28	1.008	1.532
GTEX-132AR-2826-SM-5IJFV	5.246	-2.548	4.852	1.6	4.937	1.379	4.913	-0.9971	4.803
TCGA-A2-A3XZ-01	5.246	-3.308	4.48	2.376	7.065	5.693	5.601	2.269	0.3231
TCGA-63-A5MM-01	5.245	-0.0425	5.441	0.8327	6.816	6.285	5.178	1.258	1.105
TCGA-WE-A8ZT-06	5.245	-9.966	-9.966	1.151	5.584	5.261	5.166	1.501	0.6332
TCGA-UY-A9PA-01	5.244	-1.214	4.258	-0.3752	5.768	5.433	5.454	0.9935	-9.966
TCGA-EJ-7315-11	5.244	-9.966	-9.966	-1.431	5.798	4.668	4.431	-1.214	-0.0425
TCGA-BH-A0BJ-11	5.243	0.9716	1.86	-0.1993	5.934	4.519	4.703	-9.966	2.046
TCGA-94-7033-01	5.243	0.3115	6.265	0.5955	6.351	6.224	4.985	-0.394	-9.966
TCGA-CV-6954-01	5.243	-0.4325	4.613	-1.732	5.748	5.893	4.794	-9.966	-0.6193
TCGA-HU-A4H8-01	5.243	-2.315	-9.966	0.3115	4.985	-1.884	4.868	0.8246	5.412
TCGA-D3-A3MO-06	5.242	0.2881	3.732	1.164	6.992	6.773	5.65	2.351	1.561
TCGA-DK-A2I2-01	5.242	0.2642	6.814	-0.1031	6.744	6.812	5.504	-0.2159	2.592
TCGA-FU-A3WB-01	5.242	-0.2159	5.57	0.7579	6.774	6.333	5.77	2.039	1.47
TCGA-77-6843-01	5.242	-0.4325	-9.966	1.423	7.022	6.668	5.73	1.679	0.9862
TCGA-BH-A0H7-01	5.242	-0.7834	4.403	0.2277	6.813	5.552	4.79	-0.0277	-0.4325
TCGA-BR-8591-01	5.241	-1.884	-9.966	-0.2498	5.204	4.698	5.262	1.423	-9.966
TCGA-NG-A4VW-01	5.24	-1.086	5.245	2.658	7.714	6.69	5.662	3.962	2.618
TCGA-A8-A0AD-01	5.24	-2.178	4.967	-0.1665	5.887	5.064	5.187	-9.966	6.574
TCGA-HZ-7918-01	5.239	-0.3566	3.45	-0.7588	5.096	4.524	4.792	0.2881	-9.966
TCGA-C8-A1HE-01	5.238	-1.47	3.345	0.1388	6.393	5.852	5.257	0.0854	-1.639
TCGA-C5-A1BI-01	5.238	-1.595	3.757	1.112	6.021	5.584	4.782	-1.355	0.8164
GTEX-T2IS-2226-SM-4DM65	5.238	-1.884	6.154	1.022	5.794	3.489	5.218	0.1257	5.514
TCGA-NF-A4X2-01	5.238	-2.388	5.649	1.915	7.57	7.121	6.113	3.844	2.322
TCGA-94-8491-01	5.237	1.05	4.435	0.9642	6.323	5.474	4.945	0.0854	-9.966
TCGA-CN-4722-01	5.237	0.2762	-9.966	-1.47	4.944	4.101	3.578	-1.552	-1.181
TCGA-44-A4SS-01	5.237	-0.3022	3.845	0.679	5.875	5.541	4.909	1.132	-0.1031
TCGA-MA-AA43-01	5.237	-0.8599	5.487	0.7832	6.719	5.138	5.755	1.546	3.899
GTEX-13FHP-2426-SM-5KLZ5	5.237	-1.732	7.424	0.5271	4.881	2.665	4.234	-9.966	5.095
TCGA-DX-AATS-01	5.237	-1.732	5.872	-2.114	5.778	4.69	4.066	-9.966	-9.966
TCGA-AO-A0JJ-01	5.237	-3.047	5.432	-0.7108	6.836	5.449	5.263	-1.884	1.774
TCGA-A4-A4ZT-01	5.236	0.1776	4.22	-1.431	5.298	3.819	3.704	-9.966	-9.966
TCGA-B3-A6W5-01	5.236	-0.7588	5.504	0.3346	5.097	4.677	4.667	0.1124	-0.4325
TCGA-77-7140-01	5.236	-9.966	5.545	1.656	7.858	7.757	6.78	3.444	1.423
GTEX-13O61-1526-SM-5KM3P	5.236	-9.966	4.415	0.9862	4.806	-9.966	4.01	-0.4921	4.263
TCGA-B6-A0WV-01	5.235	-1.149	4.266	0.3685	7.145	5.67	5.757	0.1776	1.571
TCGA-D8-A1JC-01	5.235	-1.884	1.368	0.1388	6.846	5.795	5.304	1.812	1.949
TCGA-VS-A8EG-01	5.234	-1.086	2.135	1.215	5.84	5.523	5.57	0.7999	3.011
TCGA-B1-A47M-01	5.234	-1.431	7.508	-0.2671	5.509	5.661	4.383	-1.431	2.141
GTEX-ZAB4-2426-SM-5HL8A	5.234	-2.466	7.034	1.145	4.686	-9.966	3.961	-9.966	4.615
TCGA-A7-A6VY-01	5.233	0.0014	5.31	1.656	6.126	5.117	5.064	1.982	2.208
TCGA-BH-A0WA-01	5.232	-0.2498	1.816	0.3115	6.336	5.828	5.607	1.816	1.872
TCGA-06-0210-02	5.232	-0.394	1.476	1.941	6.963	2.478	6.765	4.002	6.753
TCGA-A7-A4SA-01	5.232	-1.732	4.313	1.938	6.915	6.185	5.541	1.351	1.783
TCGA-CN-A497-01	5.232	-1.732	3.434	0.8408	6.147	5.418	4.791	0.2154	-0.1187
TARGET-50-PAKYLT-01	5.232	-2.548	3.913	2.29	6.543	6.95	6.744	5.143	1.385
TCGA-28-1753-01	5.231	-0.2671	3.643	1.455	5.103	2.025	5.178	2.293	5.519
TCGA-BB-4223-01	5.231	-0.8339	-9.966	0.9191	6.303	4.953	4.51	-0.8863	0.1776
GTEX-XUW1-1826-SM-4BOQD	5.231	-1.831	5.273	1.311	3.907	1.753	3.59	-9.966	4.411
TCGA-06-0190-01	5.23	-0.6193	2.734	0.9716	5.262	0.346	5.169	2.848	5.308
TCGA-IB-7897-01	5.23	-0.9132	2.836	0.5069	5.391	4.97	4.853	-9.966	-9.966
TARGET-50-PAJMLZ-01	5.23	-1.831	4.358	2.674	6.667	6.944	6.749	5.522	0.5069
TCGA-DS-A7WH-01	5.229	0.7146	-9.966	2.676	7.057	4.906	5.727	2.135	1.132
TCGA-HU-A4HB-11	5.229	-0.6416	2.526	-1.355	4.694	-0.0425	4.221	-9.966	5.912
TCGA-DX-A7EU-01	5.229	-1.639	7.527	0.6969	5.48	1.86	4.202	-9.966	3.829
GTEX-133LE-0726-SM-5P9IZ	5.229	-9.966	5.469	0.4967	4.665	1.486	3.961	-1.026	3.894
GTEX-ZYFC-2626-SM-5NQ6S	5.228	-1.639	6.959	0.2522	4.505	2.544	4.168	-0.4719	4.057
TCGA-CN-A63T-01	5.227	-0.2845	5.724	-0.1828	6.05	6.261	4.901	0.7058	-9.966
[truncated: 17,133 more rows]

## Sheet: nfiltration_estimation_for_LUAD
Supplementary Table 5: The results of infiltration estimation for LUAD
ID	B cell_TIMER	T cell CD4+_TIMER	T cell CD8+_TIMER	Neutrophil_TIMER	Macrophage_TIMER	Myeloid dendritic cell_TIMER	B cell naive_CIBERSORT	B cell memory_CIBERSORT	B cell plasma_CIBERSORT	T cell CD8+_CIBERSORT	T cell CD4+ naive_CIBERSORT	T cell CD4+ memory resting_CIBERSORT	T cell CD4+ memory activated_CIBERSORT	T cell follicular helper_CIBERSORT	T cell regulatory (Tregs)_CIBERSORT	T cell gamma delta_CIBERSORT	NK cell resting_CIBERSORT	NK cell activated_CIBERSORT	Monocyte_CIBERSORT	Macrophage M0_CIBERSORT	Macrophage M1_CIBERSORT	Macrophage M2_CIBERSORT	Myeloid dendritic cell resting_CIBERSORT	Myeloid dendritic cell activated_CIBERSORT	Mast cell activated_CIBERSORT	Mast cell resting_CIBERSORT	Eosinophil_CIBERSORT	Neutrophil_CIBERSORT	B cell naive_CIBERSORT-ABS	B cell memory_CIBERSORT-ABS	B cell plasma_CIBERSORT-ABS	T cell CD8+_CIBERSORT-ABS	T cell CD4+ naive_CIBERSORT-ABS	T cell CD4+ memory resting_CIBERSORT-ABS	T cell CD4+ memory activated_CIBERSORT-ABS	T cell follicular helper_CIBERSORT-ABS	T cell regulatory (Tregs)_CIBERSORT-ABS	T cell gamma delta_CIBERSORT-ABS	NK cell resting_CIBERSORT-ABS	NK cell activated_CIBERSORT-ABS	Monocyte_CIBERSORT-ABS	Macrophage M0_CIBERSORT-ABS	Macrophage M1_CIBERSORT-ABS	Macrophage M2_CIBERSORT-ABS	Myeloid dendritic cell resting_CIBERSORT-ABS	Myeloid dendritic cell activated_CIBERSORT-ABS	Mast cell activated_CIBERSORT-ABS	Mast cell resting_CIBERSORT-ABS	Eosinophil_CIBERSORT-ABS
TCGA-49-6743	0	0.087453	0.341375	0.185748	0.110464	0.582865	0.00620113	0	0.027159	0.122838	0	0.11206	0	0.0389915	0.00330701	0	0	0.0612781	0.0471858	0.106868	0.00987605	0.272661	0.000885145	0.0339549	0.129231	0	0.0126393	0.0148649	0.00396252	0	0.0173546	0.0784934	0	0.071606	0	0.0249156	0.00211318	0	0	0.0391567	0.0301517	0.0682884	0.0063108	0.17423	0.000565608	0.0216972	0.0825787	0	0.00807649
TCGA-05-4425	0.114855	0.134251	0.184597	0.163082	0.0729709	0.908161	0.0086675	0.00101711	0	0.00560803	0	0.100507	0	0.0339456	0.0500917	0.0104122	0	0.00544993	0.00227	0.191587	0.0535262	0.448987	0.0594387	0	0.0182103	0.00723721	0	0.00304437	0.0069355	0.000813865	0	0.00448739	0	0.0804231	0	0.0271623	0.040082	0.00833156	0	0.00436089	0.00181639	0.153302	0.0428302	0.359268	0.0475613	0	0.0145714	0.00579102	0
TCGA-78-7143	0.0619564	0.202055	0.087277	0.127881	0.0505089	0.537646	0.00841578	0.0319649	0.0163285	0.0406375	0	0.191297	0	0.0443946	0.0186615	0	0	0.00316019	0.0518744	0.0343641	0.00551403	0.298218	0.0979668	0.0994588	0.057744	0	0	0	0.0062586	0.0237715	0.0121431	0.0302211	0	0.142263	0	0.0330151	0.0138781	0	0	0.00235015	0.0385777	0.0255557	0.00410065	0.221777	0.0728555	0.0739651	0.0429428	0	0
TCGA-55-8087	0.0381334	0.198152	0.0484881	0.0697062	0.0198894	0.36879	0	0.0091835	0.0280213	0.0357617	0	0.154696	0	0.00200398	0.00813829	0	0	0.0151697	0.0345914	0.0156483	0.0117814	0.314572	0.237649	0	0.130657	0	0	0.00212494	0	0.00409503	0.012495	0.0159466	0	0.0689809	0	0.000893599	0.00362895	0	0	0.00676432	0.0154247	0.00697774	0.00525345	0.140271	0.105971	0	0.0582615	0	0
TCGA-55-6986	0	0.17566	0.312254	0.194685	0.137853	0.454104	0.00726578	0	0.00980278	0.0933095	0	0.231317	0	0	0	0	0.0418658	0.0105064	0.0555172	0.0855557	0.0219371	0.298799	0	0.0427725	0.0127179	0.05504	0.0058573	0.027736	0.00615775	0	0.00830787	0.0790799	0	0.196041	0	0	0	0	0.0354813	0.00890419	0.0470509	0.0725086	0.0185917	0.253233	0	0.0362497	0.0107784	0.0466465	0.00496406
TCGA-35-4123	0	0.0291825	0.503709	0.198608	0.0352278	0.561304	0	0.0161425	0.0484459	0.287213	0	0.00819093	0.0303343	0.0743085	0.00585898	0	0	0.0755701	0.032963	0.0128006	0.039066	0.274583	0.0207829	0	0	0.0737399	0	0	0	0.0118494	0.0355615	0.210828	0	0.00601252	0.0222668	0.0545459	0.00430076	0	0	0.055472	0.0241964	0.0093962	0.0286762	0.201557	0.0152556	0	0	0.0541285	0
TCGA-55-7576	0.12733	0.123406	0.153028	0.0902744	0.0455977	0.519136	0.0128813	0.0238697	0	0.122084	0	0.0922599	0	0.03005	0.0515982	0	0	0.0453471	0.0501612	0.0379523	0.0589848	0.369479	0.0218301	0.0163971	0.0634581	0	0	0.00364629	0.00905815	0.0167853	0	0.08585	0	0.0648774	0	0.0211312	0.036284	0	0	0.0318882	0.0352735	0.0266882	0.0414783	0.259819	0.015351	0.0115305	0.0446239	0	0
TCGA-64-5781	0	0.0154018	0.371465	0.11783	0	0.248555	0	0.00175164	0.0902569	0.265635	0	0	0.0878869	0.119125	0.00436794	0	0	0.197555	0	0.0489303	0.0391711	0.0857826	0	0.0115892	0	0.0479487	0	0	0	0.000765969	0.039468	0.116158	0	0	0.0384317	0.0520917	0.00191004	0	0	0.0863879	0	0.0213965	0.0171289	0.0375115	0	0.0050678	0	0.0209673	0
TCGA-L9-A50W	0.186003	0.130693	0.128422	0.0478519	0.0316047	0.532824	0.00604854	0	0.116172	0.0372484	0	0.203447	0	0.0501683	0.0211421	0	0	0.0570209	0.0181063	0	0.0565212	0.173201	0.147965	0	0.111422	0	0	0.00153633	0.00308975	0	0.0593436	0.0190274	0	0.103926	0	0.0256272	0.0107999	0	0	0.0291277	0.00924918	0	0.0288724	0.0884756	0.0755843	0	0.0569172	0	0
TCGA-97-A4M5	0.067096	0.163511	0.116629	0.10248	0.129632	0.397381	0.00666766	0.0209254	0.0275608	0.0661138	0	0.119903	0	0.0387767	0.016453	0	0.0106529	0.0388004	0.0258281	0.0795687	0.032259	0.360533	0	0.0317687	0.111339	0	0	0.0128492	0.00522499	0.0163978	0.0215975	0.0518089	0	0.0939602	0	0.0303867	0.0128931	0	0.00834793	0.0304053	0.0202397	0.0623526	0.0252792	0.282526	0	0.024895	0.0872488	0	0
TCGA-35-4122	0	0	0.304273	0.166284	0.113966	0.515745	0.00459445	0	0.0928026	0.0949024	0	0.0533989	0.0351716	0.0440958	0	0.00625352	0	0.0515825	0.0598451	0.0407484	0.0616057	0.412005	0.00449145	0	0	0.0301871	0	0.00831592	0.00268003	0	0.0541335	0.0553583	0	0.0311486	0.0205163	0.0257219	0	0.00364779	0	0.030089	0.0349088	0.0237693	0.0359358	0.24033	0.00261995	0	0	0.0176087	0
TCGA-55-A48Z	0.249509	0.131138	0.0308135	0.0601234	0	0.594786	0.00208975	0.00493911	0.0884756	0.0924067	0	0.0720103	0	0.0660752	0.0601801	0	0.0105932	0.0124955	0	0.276042	0.0568894	0.223831	0.00508126	0	0	0.0288911	0	0	0.00152781	0.00361099	0.0646845	0.0675586	0	0.0526468	0	0.0483076	0.0439977	0	0.00774472	0.00913545	0	0.201814	0.0415918	0.163643	0.00371491	0	0	0.0211223	0
TCGA-86-6851	0.250284	0.341233	0.429017	0.239868	0.0549362	0.845475	0	0.0124639	0.17501	0.13473	0	0.133223	0.0185055	0.0839328	0.0164459	0	0.00645646	0.0251839	0.00579467	0.00926877	0.117901	0.237288	0.00847012	0	0.0153262	0	0	0	0	0.0156703	0.220032	0.16939	0	0.167496	0.0232661	0.105525	0.0206767	0	0.00811742	0.0316626	0.00728538	0.0116532	0.148231	0.298331	0.0106491	0	0.0192689	0	0
TCGA-NJ-A4YF	0.0335817	0.02931	0.0184832	0	0	0.029656	0.0148201	0	0.0583939	0.0566938	0	0.0879389	0	0.126253	0.0483624	0	0	0.0292446	0	0.313674	0.0479543	0.170752	0	0	0	0.0444679	0	0.00144583	0.00310294	0	0.0122261	0.0118702	0	0.0184121	0	0.026434	0.0101258	0	0	0.00612304	0	0.065675	0.0100404	0.0357509	0	0	0	0.00931039	0
TCGA-05-4389	0.0210099	0.134038	0.180194	0.0900142	0	0.559382	0.0161871	0	0	0.234662	0	0.0841295	0.00374785	0.0609301	0.0431626	0	0	0.0527439	0.0156935	0.00451861	0.116865	0.249712	0.0675237	0	0.0501231	0	0	0	0.0124132	0	0	0.179953	0	0.0645154	0.00287407	0.0467248	0.0330996	0	0	0.0404471	0.0120347	0.00346514	0.0896191	0.191494	0.0517811	0	0.0384373	0	0
TCGA-NJ-A4YQ	0.257969	0.270915	0.25927	0.117166	0	0.62627	0.0225773	0.0537129	0.0506149	0.154265	0	0.0621643	0	0.0620519	0.0500872	0.012875	0	0.0347051	0	0.226942	0.0878092	0.171538	0	0	0	0.0106571	0	0	0.0222284	0.0528828	0.0498326	0.151881	0	0.0612035	0	0.0610929	0.0493131	0.012676	0	0.0341688	0	0.223434	0.086452	0.168887	0	0	0	0.0104924	0
TCGA-55-6981	0.127212	0.199781	0.310999	0.226049	0.288982	0.699139	0.0226742	0	0	0.0437203	0	0.101428	0	0.0293406	0	0	0.00489796	0.0348825	0.0420184	0.133865	0.0356778	0.429653	0	0	0.101042	0	0	0.0208007	0.0192132	0	0	0.0370468	0	0.0859455	0	0.024862	0	0	0.00415033	0.029558	0.0356047	0.113432	0.030232	0.36407	0	0	0.0856191	0	0
TCGA-97-7546	0.0900737	0.175366	0.418282	0.187694	0.0813093	0.601716	0.0353819	0.0136129	0.0767827	0.0867601	0	0.279975	0	0.0263517	0.0099719	0	0	0.0092309	0.0549557	0.00566824	0.0433227	0.215517	0.0238929	0.0137546	0.0617636	0.0388991	0	0.00415947	0.0337655	0.012991	0.0732748	0.0827964	0	0.267183	0	0.0251478	0.00951632	0	0	0.00880918	0.052445	0.00540927	0.0413435	0.205671	0.0228013	0.0131262	0.0589418	0.0371219	0
TCGA-MN-A4N1	0.00773518	0.10261	0	0	0	0.168289	0	0.0309222	0.0162112	0.0162124	0	0.104077	0	0.0609134	0.027334	0	0.00927883	0.0184557	0.106094	0.289038	0	0.240811	0	0.0709964	0.00965508	0	0	0	0	0.00958703	0.00502607	0.00502645	0	0.0322679	0	0.0188854	0.00847457	0	0.00287678	0.00572194	0.0328931	0.0896126	0	0.0746604	0	0.0220115	0.00299343	0	0
TCGA-62-A471	0	0.0532052	0.039854	0.0241781	0	0.173357	0.0354024	0	0.170269	0.155902	0	0.0157013	0	0.20363	0.0135441	0	0	0.114961	0.00521933	0.0880569	0.0332773	0.0846881	0	0.0341232	0.0133354	0.0119902	0	0.0198987	0.0102963	0	0.0495203	0.045342	0	0.00456651	0	0.059223	0.00393912	0	0	0.0334349	0.00151797	0.0256101	0.00967823	0.0246303	0	0.00992424	0.00387841	0.00348716	0
TCGA-55-7570	0.0809907	0	0.0886933	0.0165605	0.0100297	0.0973282	0	0	0.243583	0.155027	0	0	0.0127036	0.154225	0	0	0	0.0403134	0.0254791	0.109282	0.023131	0.202531	0.000287565	0	0	0.0334382	0	0	0	0	0.0804069	0.0511745	0	0	0.00419348	0.0509098	0	0	0	0.0133075	0.00841068	0.0360742	0.00763556	0.0668556	9.49e-05	0	0	0.011038	0
TCGA-55-A4DF	0.0454322	0.23236	0.16052	0.201102	0.0371358	0.588572	0.00889462	0.0402933	0.00233586	0.122598	0	0.145366	0.0293093	0.0677925	0	0	0	0.0606075	0.0306339	0.160267	0.150026	0.150266	0.00339783	0	0.0282116	0	0	0	0.00919187	0.0416398	0.00241392	0.126695	0	0.150224	0.0302888	0.0700581	0	0	0	0.062633	0.0316577	0.165623	0.15504	0.155288	0.00351138	0	0.0291544	0	0
TCGA-78-8648	0.134769	0.266115	0.309484	0.201963	0.339733	1.03832	0	0.0074205	0.0715827	0.102318	0	0.0736275	0	0.0179037	0.00100217	0.00696406	0	0.024778	0	0.415121	0.0334791	0.230089	0	0	0.015714	0	0	0	0	0.00793072	0.0765046	0.109353	0	0.07869	0	0.0191348	0.00107108	0.00744289	0	0.0264817	0	0.443664	0.0357811	0.24591	0	0	0.0167944	0	0
TCGA-67-3770	0.0850006	0	0.196264	0.0177553	0.0978917	0.400105	0.00971643	0	0.0343171	0.0502641	0	0.176926	0	0.0297561	0	0.0378606	0	0.0304678	0.0199708	0	0.0281497	0.382041	0.0163481	0.0608286	0.114205	0	0	0.00914882	0.00375612	0	0.0132661	0.0194308	0	0.0683948	0	0.0115029	0	0.0146359	0	0.0117781	0.0077202	0	0.0108819	0.147687	0.00631973	0.0235147	0.0441488	0	0
TCGA-50-5936	0.0294179	0.108331	0.567648	0.305801	0.168529	0.691923	0.0206551	0	0	0.0809634	0	0.271695	0	0.00373491	0	0	0.0778775	0.023311	0.114345	0.114216	0.00572933	0.159747	0.000183041	0.03834	0	0.0860001	0.000253161	0.00294978	0.0150709	0	0	0.0590744	0	0.19824	0	0.00272515	0	0	0.0568229	0.0170087	0.0834311	0.0833373	0.00418037	0.116558	0.000133555	0.0279746	0	0.0627495	0.000184718
TCGA-67-6216	0.12468	0.17597	0.0136297	0.121229	0	0.600636	0	0.0932878	0.0285161	0.0791478	0	0.145319	0	0.0215741	0.0393792	0	0	0.039669	0.0708929	0.0343418	0.0121855	0.241948	0.0689948	0.0308479	0.0925594	0	0	0.00133633	0	0.0613426	0.0187511	0.0520447	0	0.0955564	0	0.0141863	0.0258943	0	0	0.0260849	0.0466166	0.0225819	0.00801276	0.159096	0.0453685	0.0202845	0.0608637	0	0
TCGA-69-7974	0.0603125	0.122394	0.187072	0.217323	0.221523	0.667762	0.00706101	0.0105061	0.0108326	0.0675009	0	0.117168	0	0.0463357	0	0	0	0.0547578	0.0387033	0.0288038	0.0405405	0.52157	0.0206187	0.00477294	0.00505453	0.022166	0	0.00360814	0.00680169	0.0101203	0.0104348	0.0650219	0	0.112865	0	0.044634	0	0	0	0.0527468	0.0372819	0.0277459	0.0390516	0.502415	0.0198615	0.00459765	0.0048689	0.0213519	0
TCGA-86-8281	0.0952083	0.108365	0.0624166	0.0309416	0	0.247325	0.0021951	0.0358865	0.223717	0.0799335	0	0.147358	0	0.0605689	0.0353208	0	0	0.0465231	0.0196893	0.036504	0.0305045	0.196679	0.0278991	0.00995611	0.0472648	0	0	0	0.00103948	0.0169939	0.10594	0.0378521	0	0.0697805	0	0.0286821	0.016726	0	0	0.0220308	0.00932378	0.0172862	0.0144452	0.0931364	0.0132114	0.00471466	0.022382	0	0
TCGA-93-A4JQ	0.344331	0.52977	0	0.174557	0	0.623497	0.014886	0.169167	0	0.0543262	0	0.173692	0	0.0947541	0.049052	0	0.0110398	0.0264191	0	0.150943	0.0922896	0.156073	0	0	0.00233087	0.00248008	0	0.00254626	0.020914	0.23767	0	0.076325	0	0.244028	0	0.133124	0.0689152	0	0.0155103	0.0371173	0	0.212067	0.129661	0.219273	0	0	0.00327474	0.00348436	0
TCGA-55-8207	0	0.129491	0.185822	0.102743	0.0875788	0.548012	0	0.011979	0.0107114	0.0614649	0	0.153291	0	0.00800513	0.0038934	0	0	0.0122655	0.0717287	0.0661412	0.014846	0.431662	0.0884019	0.00517591	0.0583704	0	0	0.00206376	0	0.00792654	0.00708772	0.0406714	0	0.101433	0	0.005297	0.00257627	0	0	0.0081161	0.047463	0.0437657	0.00982359	0.285631	0.0584957	0.0034249	0.0386238	0	0
TCGA-97-8176	0.0975821	0.0582379	0.0524515	0.0622329	0.0367316	0.392896	0.0138516	0.00564288	0.0467223	0.0558941	0	0.0610357	0	0.0615061	0.00652925	0	0.0265928	0	0.0508999	0.108862	0.0181749	0.461259	0	0.00437199	0.0482024	0	0	0.030455	0.00643162	0.00262012	0.0216943	0.0259529	0	0.0283403	0	0.0285587	0.00303168	0	0.0123476	0	0.023634	0.0505473	0.00843902	0.214173	0	0.00203001	0.0223815	0	0
TCGA-86-8280	0.134829	0.303032	0.152615	0.124475	0.0552376	0.633824	0	0.0370811	0.0612686	0.0575795	0	0.174757	0	0.0825832	0.0334021	0	0	0.0263891	0.0281822	0.0454281	0.110539	0.235105	0.0393417	0.0119307	0.0564133	0	0	0	0	0.0392171	0.0647979	0.0608964	0	0.184824	0	0.0873403	0.0353262	0	0	0.0279092	0.0298056	0.0480449	0.116906	0.248648	0.0416079	0.012618	0.0596629	0	0
TCGA-MP-A4T8	0	0.0997713	0.0310412	0.0278615	0	0.14247	0.0148275	0	0.0356499	0.0217775	0	0.0174627	0	0.0649838	0.0889634	0.0053999	0	0.0276426	0	0.387592	0	0.181462	0	0.127591	0.0266487	0	0	0	0.00491699	0	0.011822	0.00722171	0	0.00579086	0	0.0215495	0.0295015	0.00179068	0	0.00916666	0	0.128531	0	0.0601752	0	0.0423109	0.00883707	0	0
TCGA-55-A492	0.0595868	0.0499603	0	0	0	0.108092	0	0.0116402	0.214804	0.112931	0	0.0953653	0	0.0984794	0.0307682	0	0	0.0545993	0.0334225	0.00890071	0.0172899	0.226753	0	0.0439069	0.0511398	0	0	0	0	0.00266797	0.0492336	0.0258839	0	0.0218579	0	0.0225717	0.00705214	0	0	0.0125143	0.00766052	0.00204006	0.00396289	0.0519723	0	0.0100636	0.0117213	0	0
TCGA-J2-8192	0.0951676	0.188891	0.270245	0.259331	0.255314	0.843143	0	0.0143203	0.0272308	0.0180182	0	0.237091	0	0.00531668	0	0	0	0.0173994	0.0294432	0.102455	0.0153453	0.361464	0.0827229	0.0269845	0.0521382	0	0	0.0100705	0	0.0166342	0.0316308	0.0209296	0	0.2754	0	0.00617576	0	0	0	0.0202109	0.0342007	0.11901	0.0178248	0.41987	0.0960894	0.0313447	0.0605628	0	0
TCGA-50-8460	0.0857005	0.203349	0.0693499	0.107134	0	0.445847	0	0.0457373	0.117968	0.0843447	0	0.0989405	0	0.0593848	0.0465323	0	0	0.0487915	0.117298	0	0	0.143377	0.0752785	0.0479832	0.114363	0	0	0	0	0.030989	0.0799287	0.0571472	0	0.0670366	0	0.0402358	0.0315277	0	0	0.0330584	0.0794746	0	0	0.0971445	0.0510045	0.0325107	0.0774862	0	0
TCGA-80-5607	0.124067	0.123608	0.151011	0.118752	0	0.507226	0.00120724	0.0166065	0.0647244	0.150267	0	0.107083	0	0.0718315	0.0016144	0	0	0.0816156	0.0179709	0	0.110038	0.255925	0.0323444	0	0.0867587	0	0	0.00201396	0.000791387	0.0108862	0.0424291	0.0985049	0	0.0701966	0	0.047088	0.00105829	0	0	0.0535019	0.0117806	0	0.0721334	0.167768	0.0212029	0	0.0568734	0	0
TCGA-NJ-A55A	0.229383	0.332366	0.167835	0.12545	0.0534733	0.425164	0	0.142117	0.0281222	0.0870862	0	0.219665	0	0.0661918	0.00289484	0	0	0.0494767	0.0156484	0	0.0473203	0.178954	0.0437018	0.0082887	0.109071	0	0	0.00146248	0	0.168087	0.0332614	0.103001	0	0.259808	0	0.0782879	0.00342386	0	0	0.0585182	0.018508	0	0.0559678	0.211656	0.051688	0.0098034	0.129003	0	0
TCGA-55-8097	0.0306717	0.224581	0.104425	0.0598493	0.0181082	0.356352	0	0.0592959	0.0631804	0.0676414	0	0.144873	0	0.06755	0.034516	0	0	0.0347838	0.0297492	0	0.0159971	0.283699	0.0633416	0.00922279	0.126151	0	0	0	0	0.0390195	0.0415757	0.0445113	0	0.0953331	0	0.0444511	0.0227132	0	0	0.0228894	0.0195764	0	0.0105269	0.186687	0.0416818	0.00606904	0.0830131	0	0
TCGA-55-A490	0.0257126	0.122969	0.0199474	0.0669889	0.0246315	0.342727	0	0.00190091	0.088457	0.103167	0	0.0763004	0	0.0157604	0.0799836	0	0	0.0232008	0.0714111	0.19669	0.0220448	0.282361	0.0339554	0	0	0.00476789	0	0	0	0.000684132	0.0318355	0.0371295	0	0.0274604	0	0.00567213	0.0287859	0	0	0.00834991	0.0257007	0.0707884	0.00793386	0.101621	0.0122205	0	0	0.00171595	0
TCGA-86-7711	0	0	0.0448103	0.349884	0.080417	0.555678	0.00766165	0	0.0295885	0.0387209	0	0.155604	0	0.00287948	0.0228629	0	0.0553032	0	0.0187605	0.233931	0.0314353	0.163192	0	0	0	0.208397	0	0.0316636	0.00464612	0	0.0179428	0.0234809	0	0.0943605	0	0.00174616	0.0138644	0	0.0335366	0	0.0113766	0.141859	0.0190628	0.0989616	0	0	0	0.126374	0
TCGA-MP-A4TK	0.112909	0.302447	0.0527906	0.107737	0.0979509	0.73466	0.0103571	0.0349717	0.0940097	0.0517707	0	0.10261	0	0.0701052	0.0223965	0	0.00514996	0	0	0.280114	0.0457166	0.272207	0	0	0.00987629	0	0	0.000715568	0.00961273	0.0324581	0.0872528	0.0480497	0	0.0952345	0	0.0650664	0.0207868	0	0.00477981	0	0	0.259981	0.0424307	0.252642	0	0	0.00916643	0	0
TCGA-50-5942	0.0396754	0.133382	0.155669	0.0515976	0	0.324595	0.0226704	0	0.190365	0.0892662	0	0.191207	0	0.0403332	0.00883361	0	0	0.0189915	0.040934	0	0.0325023	0.184101	0.0229076	0	0.157888	0	0	0	0.0112618	0	0.0945664	0.0443441	0	0.0949847	0	0.0200361	0.00438821	0	0	0.00943425	0.0203345	0	0.0161459	0.0914544	0.0113796	0	0.0784327	0	0
TCGA-69-8453	0.161159	0.224747	0.182605	0.192228	0.130176	1.09876	0.006124	0.0287658	0	0.075314	0	0.107711	0	0.0636466	0.00490656	0	0	0.0542626	0.034281	0.256687	0.0759361	0.248589	0.0170343	0	0.0128354	0.00806665	0	0.00584046	0.0052966	0.0248793	0	0.0651385	0	0.0931585	0	0.0550475	0.00424364	0	0	0.0469313	0.0296494	0.222006	0.0656766	0.215002	0.0147328	0	0.0111012	0.00697678	0
TCGA-44-8119	0.00328372	0.0944159	0.138567	0.120425	0.0729042	0.354634	0.00035114	0	0.128798	0.0728149	0	0.0785172	0.0041977	0.0393497	0.0222862	0	0.0166753	0.0438158	0.0540128	0.194452	0.0619705	0.25172	0	0	0	0.0301186	0	0.000919812	0.000233537	0	0.0856614	0.0484279	0	0.0522203	0.00279182	0.0261708	0.0148221	0	0.0110905	0.0291411	0.0359229	0.129326	0.0412154	0.167415	0	0	0	0.0200313	0
TCGA-MP-A4TE	0.0842521	0	0	0.0133475	0	0.0669664	0.0114573	0	0.319021	0.0981248	0	0.00243498	0	0.0476288	0.0676656	0	0.0185564	0	0	0.0944576	0	0.187863	0	0.00261703	0	0.086356	0	0.0638173	0.00265127	0	0.0738226	0.0227064	0	0.000563463	0	0.0110215	0.0156581	0	0.00429401	0	0	0.0218578	0	0.0434722	0	0.000605591	0	0.0199831	0
TCGA-55-6543	0.0184435	0.114178	0.0496762	0.131687	0.0387636	0.555298	0.00550722	0	0.0619152	0.0303369	0	0.125251	0	0.00779163	0.00806882	0	0	0.026358	0.0278999	0.129018	0.0388831	0.456134	0.00201605	0	0	0.0436835	0	0.0371369	0.00275804	0	0.0310075	0.0151929	0	0.0627265	0	0.00390209	0.00404091	0	0	0.0132002	0.0139724	0.0646129	0.0194729	0.228434	0.00100965	0	0	0.0218769	0
TCGA-49-AAR3	0	0.263515	0.138475	0.2477	0	0.616202	0	0.0270024	0.0118171	0.193367	0	0.0177678	0.0620626	0.0627205	0.0257244	0	0	0.102481	0	0.150415	0.0861748	0.256567	0.00297172	0	0.000928844	0	0	0	0	0.0257584	0.0112727	0.184458	0	0.0169493	0.0592033	0.0598309	0.0245392	0	0	0.0977592	0	0.143486	0.0822047	0.244747	0.00283481	0	0.000886051	0	0
TCGA-38-4632	0	0	0.258472	0.177423	0.680119	0.888221	0.00534882	0	0	0.065457	0	0.142364	0.00112917	0	0	0	0.0184719	0	0.0452881	0.0414317	0.0358785	0.537157	0	0.0373728	0.0343253	0	0	0.0357759	0.00385604	0	0	0.0471889	0	0.102632	0.000814037	0	0	0	0.0133167	0	0.0326489	0.0298687	0.0258653	0.387244	0	0.0269426	0.0247456	0	0
TCGA-62-A46S	0.0325238	0.131034	0.0669848	0.0551582	0.0146886	0.254396	0	0	0.167275	0.0966701	0	0.209999	0	0.0106628	0.0207391	0	0.00439284	0.015181	0.0445561	0.0413571	0.0783434	0.277161	0.0202438	0	0.0134182	0	0	0	0	0	0.0789938	0.0456514	0	0.0991698	0	0.00503539	0.00979384	0	0.00207447	0.00716909	0.0210412	0.0195305	0.0369968	0.130887	0.00955993	0	0.00633662	0	0
TCGA-99-8033	0.0401437	0.0476697	0.224888	0.178338	0	0.457222	0.00507361	0	0.0788527	0.166659	0	0.0102147	0.048889	0.134093	0	0	0	0.110542	0.0197691	0.0297188	0.0698467	0.123042	0	0.060361	0	0.127804	0	0.0151343	0.00354879	0	0.0551544	0.116572	0	0.00714481	0.0341959	0.0937928	0	0	0	0.0773197	0.0138277	0.0207871	0.0488551	0.0860632	0	0.0422201	0	0.0893937	0
TCGA-55-6980	0.0829527	0.226911	0.295037	0.151883	0.111967	0.6103	0	0.00514733	0.0375971	0.0898972	0	0.216915	4.19e-05	0.0175213	0	0	0.049802	0.00113329	0.049955	0.0699133	0.0769463	0.300577	0	0	0.0794589	0	0	0.00509361	0	0.0039887	0.0291343	0.0696619	0	0.168089	3.25e-05	0.0135774	0	0	0.0385919	0.000878191	0.0387104	0.0541763	0.0596262	0.232919	0	0	0.0615732	0	0
TCGA-05-4244	0	0.103077	0.0765323	0.156794	0	0.432894	0	0.0422206	0.00654703	0.0452744	0	0.145817	0	0.0562688	0.00721887	0	0.00257335	0.0139965	0.127183	0.0956584	0.0217504	0.307878	0.0514795	0.0176956	0.0583335	0	0	0.000105498	0	0.0250614	0.00388621	0.0268741	0	0.0865545	0	0.0334002	0.004285	0	0.0015275	0.00830808	0.0754938	0.0567812	0.0129107	0.182751	0.0305574	0.0105038	0.0346258	0	0
TCGA-91-8497	0.403079	0.393739	0.0214868	0.0802431	0.0336973	0.681958	0.0164218	0.0678282	0.194668	0.0938247	0	0.146038	0	0.046899	0.0414203	0	0	0.0371866	0.0233408	0.0353398	0.00831567	0.160998	0.0586326	0.00253159	0.0664479	0	0	0.000107294	0.0192679	0.0795836	0.228406	0.110086	0	0.171348	0	0.0550271	0.0485989	0	0	0.0436315	0.027386	0.0414646	0.00975687	0.188901	0.0687943	0.00297035	0.0779641	0	0
TCGA-64-1680	0.205753	0	0.0343402	0	0	0.236778	0.0168373	0	0.100552	0.0549771	0	0.163382	0	0.0603995	0	0.0150996	0	0.0179488	0	0	0.0488656	0.453694	0	0	0.0664337	0	0	0.00181057	0.00346664	0	0.0207027	0.0113192	0	0.0336387	0	0.0124356	0	0.00310885	0	0.00369547	0	0	0.0100609	0.093411	0	0	0.013678	0	0
TCGA-86-7953	0.123888	0.203018	0.131092	0.260127	0.121577	0.569818	0.00884159	0.0155662	0	0.0622435	0	0.214417	0	0.0503016	0.0475602	0	0	0.0460153	0.0883217	0.0985546	0.031212	0.281977	0	0.00767742	0	0.0419515	0	0.00536097	0.00852862	0.0150152	0	0.0600403	0	0.206827	0	0.0485211	0.0458767	0	0	0.0443865	0.0851954	0.0950661	0.0301071	0.271996	0	0.00740566	0	0.0404666	0
TCGA-55-8616	0.0916287	0.17008	0.0584634	0.0340376	0.0391686	0.157303	0.065733	0.0861606	0.125979	0.115033	0	0.108456	0	0.0240347	0.0321481	0.00349971	0	0.00207262	0.0248534	0	0.0314883	0.344127	0	0.00372195	0.0326933	0	0	0	0.0296282	0.0388357	0.0567832	0.0518497	0	0.0488849	0	0.0108333	0.0144903	0.00157745	0	0.000934207	0.0112023	0	0.0141929	0.15511	0	0.00167762	0.0147361	0	0
TCGA-86-8055	0.127464	0.106604	0.195657	0.190616	0.112063	0.738761	0.00432802	0	0.131067	0.0349087	0	0.136953	0	0.0119373	0.0195926	0	0	0.0128608	0.01083	0.186803	0.0770326	0.291799	0.00591904	0.00892939	0.0186761	0.0176034	0	0.0307597	0.00380626	0	0.115267	0.0307003	0	0.120443	0	0.0104982	0.0172306	0	0	0.0113104	0.00952442	0.164283	0.067746	0.256621	0.00520547	0.00785291	0.0164246	0.0154813	0
TCGA-73-4668	0.00957078	0.054836	0.161995	0.0542004	0.0414201	0.274058	0	0.0230884	0.139349	0.0904524	0	0.0768457	0	0.0274565	0.0112528	0	0	0.00557088	0	0.292408	0.0427673	0.224178	0	0.0051633	0.0614681	0	0	0	0	0.00853184	0.0514934	0.0334247	0	0.0283967	0	0.010146	0.00415824	0	0	0.0020586	0	0.108053	0.0158037	0.0828402	0	0.00190799	0.0227142	0	0
TCGA-95-7567	0.0551701	0.128541	0.0751625	0.0833316	0	0.293333	0	0.00806231	0.167088	0.112058	0	0.119181	0.0306285	0.0419283	0.0496568	0	0	0.0528636	0.0092773	0	0.0741737	0.31492	0.00741403	0.0124475	0	0	0	0.000300592	0	0.00419991	0.0870415	0.0583747	0	0.0620848	0.0159553	0.0218418	0.0258678	0	0	0.0275383	0.00483283	0	0.0386394	0.164052	0.0038622	0.00648427	0	0	0
TCGA-99-AA5R	0.259619	0.356079	0.306845	0.182645	0.0811264	0.632548	0	0.124636	0.0421774	0.15055	0	0.151143	0	0.136319	0.00156171	0	0	0.0739801	0.0128147	0.058597	0.045543	0.16087	0.00561292	0	0.00911939	0.0270747	0	0	0	0.1466	0.0496102	0.177081	0	0.177779	0	0.160342	0.00183692	0	0	0.0870173	0.0150729	0.0689234	0.0535689	0.18922	0.00660207	0	0.0107265	0.031846	0
TCGA-97-8174	0.103015	0.186979	0.14015	0.0662689	0.0930639	0.423144	0.0297891	0	0.0711492	0.0551937	0	0.205471	0	0.0190527	0.0043744	0	0.00873391	0.011396	0.0364633	0	0.0847849	0.401131	0	0.00602122	0.0664401	0	0	0	0.0223503	0	0.0533823	0.0414111	0	0.154162	0	0.014295	0.00328205	0	0.00655293	0.00855025	0.0273579	0	0.0636129	0.300963	0	0.00451764	0.0498491	0	0
TCGA-55-8089	0	0.164109	0.707394	0.338859	0.201298	0.931407	0.0138712	0.00443496	0.0168777	0.17858	0	0.000146246	0.0434154	0.0643791	0	0	0	0.109117	0.0154395	0.122214	0.186751	0.208403	0.0118445	0	0.0245259	0	0	0	0.0169708	0.00542598	0.0206491	0.218486	0	0.000178926	0.0531169	0.0787651	0	0	0	0.1335	0.0188896	0.149524	0.228481	0.254972	0.0144913	0	0.0300064	0	0
TCGA-69-A59K	0.136633	0.0599606	0.202906	0.116418	0.0774189	0.323872	0.0215815	0	0.287003	0.079653	0	0.0752613	0.00843104	0.047672	0.00618618	0	0.0118353	0	0.011868	0.0395108	0.0825311	0.305351	0.0126411	0	0.00155744	0.00891717	0	0	0.0166384	0	0.221267	0.0614091	0	0.0580233	0.00649998	0.0367532	0.00476929	0	0.00912449	0	0.00914973	0.0304612	0.063628	0.235413	0.00974573	0	0.00120072	0.00687477	0
TCGA-55-6978	0	0.130946	0.535567	0.254789	0.175366	0.636064	0.00647063	0	0	0.0595095	0	0.18035	0	0.0143541	0	0	0.0643071	0.0351366	0.110099	0.0835096	0.0315571	0.20976	0	0.0678825	0.110396	0	0	0.0266671	0.00600724	0	0	0.0552478	0	0.167435	0	0.0133261	0	0	0.0597018	0.0326203	0.102215	0.0775292	0.0292972	0.194739	0	0.0630212	0.10249	0	0
TCGA-78-7153	0.0814309	0.0314773	0.0604317	0	0	0.146024	0.0310685	0.0114333	0.142035	0.138665	0	0.218089	0	0.0586078	0.0290638	0	0	0.0870778	0.0149369	0	0.0253619	0.176122	0	0.00930779	0.0582309	0	0	0	0.00821062	0.00302153	0.0375364	0.0366457	0	0.0576355	0	0.0154886	0.00768083	0	0	0.0230125	0.00394745	0	0.00670252	0.0465447	0	0.00245982	0.015389	0	0
TCGA-05-5715	0.0121084	0.107888	0.0727429	0.0896995	0.167994	0.413972	0	0.0436436	0.0148259	0.0242106	0	0.0830726	0	0.0162628	0.0101578	0	0	0.00871165	0.0016297	0.299619	0.00628048	0.41765	0.00605263	0.00813325	0.0548781	0	0	0.00487154	0	0.0229481	0.00779556	0.0127301	0	0.0436801	0	0.00855109	0.00534102	0	0	0.00458064	0.000856905	0.157542	0.00330232	0.219603	0.00318251	0.00427651	0.0288552	0	0
TCGA-69-8254	0.114965	0.167009	0.150185	0.124042	0.0582702	0.461557	0	0.0542965	0.13727	0.0760009	0	0.174466	0	0.077698	0.00578881	0.00975565	0	0.0156724	0.0182048	0	0.0866267	0.278099	0.0171428	0.00766291	0.000878092	0.031679	0	0.00875853	0	0.0429876	0.10868	0.0601714	0	0.138128	0	0.061515	0.00458311	0.00772374	0	0.0124081	0.0144131	0	0.068584	0.220177	0.0135723	0.00606688	0.000695203	0.0250809	0
TCGA-J2-A4AE	0.251548	0.0757011	0.235428	0.0788057	0	0.530248	0.0254922	0.0654961	0.149662	0.0908648	0	0.112118	0	0.0957469	0.00312481	0	0	0.0484276	0.00830495	0.0100546	0.0531037	0.25681	0.00590956	0.0149839	0	0.0498421	0	0.010058	0.018624	0.0478498	0.109339	0.0663836	0	0.0819108	0	0.0699503	0.00228291	0	0	0.03538	0.00606739	0.00734567	0.0387963	0.187619	0.00431738	0.0109468	0	0.0364134	0
TCGA-78-7150	0	0.035308	0.145185	0.0869717	0	0.353349	0.0713307	0	0.1924	0.0748662	0	0.0848223	0	0.0679959	0.0214088	0	0	0.0732246	0.000883563	0.102223	0.0506182	0.180753	0	0.0347768	0	0.0413451	0	0.00335192	0.0252529	0	0.0681146	0.0265045	0	0.0300292	0	0.0240722	0.00757927	0	0	0.0259233	0.000312804	0.0361894	0.0179201	0.0639911	0	0.0123119	0	0.0146372	0
TCGA-93-A4JN	0.175996	0.310888	0.0236085	0.147587	0.0330776	0.451829	0.0380757	0.0572672	0.148282	0.0657326	0	0.0920081	0	0.106586	0.053301	0	0	0.0340696	0.0349641	0.0388606	0.0240521	0.203641	0	0.0145991	0.0885609	0	0	0	0.0382815	0.0575767	0.149083	0.0660879	0	0.0925054	0	0.107162	0.053589	0	0	0.0342537	0.0351531	0.0390706	0.0241821	0.204742	0	0.014678	0.0890396	0	0
TCGA-J2-8194	0.0015935	0.0794495	0.159608	0.173183	0.0359357	0.345269	0.0155337	0	0.105604	0	0	0.238021	0	0.0367985	0.00496981	0	0.0557802	0	0.0998103	0	0.0383221	0.294381	0.0296598	0.00575818	0	0.038581	0	0.0367801	0.00938487	0	0.0638019	0	0	0.143803	0	0.0222322	0.00300256	0	0.0337002	0	0.0603015	0	0.0231527	0.177854	0.0179193	0.00347887	0	0.0233091	0
TCGA-55-6712	0.101995	0.238838	0.302863	0.164041	0	0.694596	0.0165631	0.0170752	0.00252876	0.132335	0	0.164805	0.0257345	0.00920382	0.0149239	0.05186	0	0.0276094	0	0.13853	0.102718	0.23219	0	0	0.0639242	0	0	0	0.0145355	0.0149849	0.0022192	0.116135	0	0.14463	0.0225842	0.00807713	0.013097	0.0455115	0	0.0242296	0	0.121571	0.0901437	0.203766	0	0	0.0560989	0	0
TCGA-55-7815	0.0224382	0.0654644	0.420633	0.150872	0.179756	0.438396	0.0466601	0	0.0459449	0.0214855	0	0.263388	0.0492383	0	0	0.0753364	0	0	0	0.03395	0.0356129	0.349381	0.0555592	0.00252399	0.00740164	0	0	0.0135188	0.0254569	0	0.0250668	0.0117221	0	0.1437	0.0268635	0	0	0.0411022	0	0	0	0.0185226	0.0194298	0.190616	0.0303122	0.00137705	0.00403821	0	0
TCGA-50-5049	0.21197	0.236704	0.436226	0.242742	0.266172	0.82981	0.01466	0.0184032	0.0670545	0.183616	0	0.124122	0.0118398	0.0531108	0.0226554	0.0040333	0	0.0437173	0.0255932	0.0882999	0.0831114	0.246684	0.0130999	0	0	0	0	0	0.0160606	0.0201615	0.0734609	0.201159	0	0.13598	0.012971	0.058185	0.0248199	0.00441864	0	0.047894	0.0280384	0.0967362	0.0910519	0.270252	0.0143515	0	0	0	0
TCGA-49-4510	0.0468414	0	0.053292	0	0	0.0897308	0.00645081	0	0.242868	0.114837	0	0.0579531	0	0.0811558	0.00187897	0	0	0.036305	0.022924	0	0.0177312	0.368851	0.00434498	0.0135322	0.0228766	0	0	0.0082909	0.00177844	0	0.066957	0.0316599	0	0.0159773	0	0.0223741	0.000518018	0	0	0.010009	0.00631999	0	0.00488835	0.10169	0.00119788	0.00373074	0.00630691	0	0
TCGA-73-4666	0	0.0616101	0.424235	0.205614	0.0747283	0.622317	0.00170721	0	0.00390813	0.212434	0	0.0238104	0.102062	0.047748	0.00176262	0	0	0.0405627	0.0109826	0.0383926	0.109404	0.395003	0	0	0.00791683	0	0	0.00430733	0.0012804	0	0.00293107	0.159324	0	0.0178576	0.0765455	0.0358107	0.00132196	0	0	0.0304218	0.0082369	0.0287942	0.0820521	0.296249	0	0	0.00593757	0	0
TCGA-MP-A5C7	0.0547391	0.03004	0.0425634	0.000792926	0	0.115297	0.0187906	0	0.160269	0.0571789	0	0.0551993	0	0.110995	0	0	0	0.127338	0.0120853	0.0354289	0.0388576	0.264673	0.00928558	0.0635871	0.0463114	0	0	0	0.00501146	0	0.0427438	0.0152496	0	0.0147217	0	0.0296022	0	0	0	0.0339611	0.00322314	0.00944888	0.0103633	0.0705882	0.00247646	0.0169587	0.0123512	0	0
TCGA-55-7994	0.125692	0.194961	0.332032	0.210709	0.0655585	0.828005	0.0233637	0.00489577	0.00959245	0.198948	0	0.0639728	0.0599914	0.0412119	0.00698783	0.0108711	0	0.0469545	0.00378917	0.0462763	0.14052	0.310785	0.0130962	0	0	0.0164964	0	0.00224773	0.0249101	0.0052198	0.0102273	0.212116	0	0.068207	0.063962	0.0439396	0.00745033	0.0115906	0	0.0500623	0.00403996	0.0493391	0.14982	0.331354	0.013963	0	0	0.0175882	0
TCGA-95-7039	0	0.122931	0.224003	0.0361212	0	0.381868	0.0144349	0	0.0225637	0.121619	0	0.0928469	0	0.0964188	0.00596048	0.0208902	0	0.021645	0	0.111794	0.140124	0.319884	0.00947965	0	0.0144901	0.0078484	0	0	0.00592924	0	0.00926821	0.049956	0	0.0381375	0	0.0396047	0.00244831	0.0085808	0	0.00889086	0	0.0459203	0.0575569	0.131395	0.00389383	0	0.00595192	0.00322379	0
TCGA-78-7156	0.0307074	0.0461184	0.0654996	0	0	0.0457476	0.00175123	0	0.174468	0.141659	0	0.116134	0	0.0612803	0.0100084	0	0.000659335	0	0.0482218	0	0.126249	0.169981	0	0.00805889	0.14153	0	0	0	0.000402748	0	0.0401241	0.0325788	0	0.0267085	0	0.0140932	0.00230173	0	0.000151634	0	0.0110901	0	0.0290347	0.0390921	0	0.00185338	0.032549	0	0
TCGA-55-8299	0	0.183955	0.408134	0.231247	0.00855993	0.687787	0.0032012	0.005533	0.041016	0.214699	0	0.0197893	0.00370643	0.0967474	0.0146991	0	0.00733254	0.0516602	0.0343771	0	0.130686	0.215948	0	0.142149	0.0113178	0	0	0.00713745	0.00354645	0.00612975	0.0454397	0.237855	0	0.0219236	0.00410618	0.107182	0.0162845	0	0.00812337	0.0572319	0.0380847	0	0.144781	0.239239	0	0.15748	0.0125384	0	0
TCGA-44-7661	0.0130889	0.303228	0.124841	0.215108	0.0596412	0.95607	0.0320981	0	0	0.0476912	0	0.213638	0	0.0398143	0.0219318	0	0	0.0240195	0.10849	0.026475	0.0711798	0.324571	0	0.0782317	0.0118601	0	0	0	0.0358247	0	0	0.0532283	0	0.238441	0	0.0444368	0.0244781	0	0	0.0268082	0.121085	0.0295488	0.0794439	0.362254	0	0.0873145	0.013237	0	0
TCGA-44-4112	0.00809922	0.013145	0.180555	0.100808	0.0365018	0.31268	0.00526222	0.0019908	0.134545	0.0898299	0	0.113335	0.0452491	0.0217643	0	0.00547354	0	0.0125074	0.0238844	0.00257936	0.0233724	0.402763	0.0132893	0.0603105	0.0159925	0.0144074	0	0.0134436	0.00274626	0.00103896	0.0702168	0.0468807	0	0.0591474	0.0236147	0.0113584	0	0.00285654	0	0.00652738	0.0124649	0.00134613	0.0121976	0.210195	0.00693546	0.031475	0.00834621	0.00751895	0
TCGA-69-7765	0.101493	0.0935263	0.237218	0.119864	0.0925053	0.45285	0	0.0466791	0.162334	0.0664121	0	0.13455	0.0475179	0.0506297	0.0035342	0	0.0158006	0	0.00426734	0.0723888	0.06259	0.192783	0.116789	0.0109833	0.0115546	0.00118488	0	0	0	0.0320672	0.111519	0.0456232	0	0.0924324	0.0326434	0.0347812	0.00242789	0	0.0108546	0	0.00293154	0.0497291	0.0429976	0.132437	0.0802309	0.00754522	0.00793766	0.000813977	0
TCGA-55-7281	0.049419	0.1977	0.0601293	0.13789	0.110641	0.611077	0	0.0229938	0.014487	0.0621796	0	0.145866	0	0.0386562	0.00893018	0	0	0.0375415	0.0758286	0	0.0886963	0.311751	0.170749	0	0.0223209	0	0	0	0	0.0137605	0.00866971	0.0372111	0	0.0872927	0	0.0231337	0.00534423	0	0	0.0224666	0.0453793	0	0.05308	0.186566	0.102184	0	0.0133579	0	0
TCGA-50-6597	0.173844	0.240356	0.0299012	0	0	0.296641	0	0.0515289	0.168568	0.0551229	0	0.153973	0	0.0149727	0.144488	0.0790459	0	0.0315926	0.000791065	0	0.077704	0.156163	0.0238986	0.000143774	0.0420084	0	0	0	0	0.0194962	0.0637784	0.020856	0	0.0582562	0	0.00566498	0.0546675	0.0299074	0	0.0119532	0.000299303	0	0.0293997	0.059085	0.00904216	5.44e-05	0.0158941	0	0
TCGA-73-4677	0.0642227	0.0511809	0.0871803	0.0307082	0	0.29254	0	0.0273181	0.139755	0.108769	0	0.234958	0	0.0134037	0.00848776	0	0	0.0397773	0.0302863	0	0.0306081	0.310938	0.0302354	0.00730119	0.0107886	0.0023651	0	0.00500852	0	0.0115903	0.0592939	0.0461477	0	0.0996861	0	0.00568682	0.00360111	0	0	0.0168764	0.0128496	0	0.0129861	0.131922	0.012828	0.00309768	0.00457731	0.00100344	0
TCGA-05-4434	0.156776	0.191227	0.189142	0.205709	0.106979	0.839399	0.0215173	0.00547742	0.0131404	0.0486627	0	0.177637	0	0.0385707	0.0318735	0	0	0.0251617	0.0238916	0.0350653	0.150168	0.35411	0.0227121	0	0.0482045	0	0	0.00380774	0.0230997	0.00588023	0.0141067	0.0522413	0	0.190701	0	0.0414072	0.0342174	0	0	0.027012	0.0256486	0.037644	0.161211	0.380151	0.0243823	0	0.0517494	0	0
TCGA-MP-A4SW	0.199916	0.195846	0.0567089	0.100433	0.0229558	0.57467	0.00159626	0.0499452	0.126706	0.0798179	0	0.158673	0	0.0428869	0.0620646	0	0.00571515	0.0245263	0.0408463	0.0463703	0.0179999	0.268879	0.00844036	0.014389	0.0496198	0	0	0.00152407	0.00126849	0.0396894	0.100688	0.0634281	0	0.126091	0	0.0340805	0.0493202	0	0.0045416	0.0194901	0.0324589	0.0368486	0.0143038	0.213668	0.00670721	0.0114344	0.0394308	0	0
TCGA-55-6972	0	0.180029	0.598885	0.226415	0.217605	0.536127	0	0	0	0.127766	0	0.25082	0	0	0	0	0.141522	0	0.0690855	0.103239	0.0345497	0.199086	0	0.0485646	0.00941995	0.0121732	0	0.0037727	0	0	0	0.115099	0	0.225953	0	0	0	0	0.127491	0	0.0622362	0.0930037	0.0311244	0.179348	0	0.0437498	0.00848603	0.0109663	0
TCGA-78-7633	0.0112344	0.0587948	0.0491558	0	0	0.0940533	0.0428735	0	0.0412855	0.0251816	0	0.217664	0	0.0572434	0	0	0	0.060342	0.118549	0	0	0.299729	0	0.112982	0.0241498	0	0	0	0.00917597	0	0.00883611	0.00538948	0	0.0465854	0	0.0122515	0	0	0	0.0129147	0.0253724	0	0	0.0641494	0	0.0241808	0.00516865	0	0
TCGA-44-2659	0.13806	0.149027	0.236159	0.052515	0.00818672	0.46582	0.00209981	0	0.116364	0.174846	0	0.186546	0	0.0384581	0.0415377	0.0174685	0	0.0174462	0.00747131	0.00387405	0.0870596	0.241862	0	0.00607964	0.0543004	0	0	0.00458698	0.00151614	0	0.084019	0.126245	0	0.134693	0	0.0277682	0.0299917	0.0126129	0	0.0125968	0.00539456	0.0027972	0.0628602	0.174633	0	0.00438973	0.0392069	0	0
TCGA-55-6983	0.202401	0.0726006	0.319909	0.175169	0.234077	0.807779	0.00505194	0	0	0.102481	0	0.137229	0	0.0577764	0	0	0	0.0295945	0.0167248	0.165079	0.049168	0.357667	0	0.0146168	0.0472415	0	0	0.0173696	0.00351032	0	0	0.0712085	0	0.0953532	0	0.0401456	0	0	0	0.0205636	0.0116211	0.114704	0.0341642	0.248524	0	0.0101564	0.0328256	0	0
TCGA-97-A4M0	0.1804	0.294933	0.0594361	0.116747	0	0.603396	0.000479754	0.0206352	0	0.118455	0	0.205181	0	0.0491131	0.0536978	0	0	0.0734952	0.082112	0.000254812	0.0514653	0.189366	0.0481699	0.0170133	0.0905614	0	0	0	0.000410582	0.0176599	0	0.101376	0	0.175597	0	0.0420318	0.0459555	0	0	0.0628985	0.0702728	0.000218073	0.0440449	0.162063	0.0412246	0.0145603	0.077504	0	0
TCGA-50-5068	0.106459	0.00447893	0.249298	0.144476	0.0648029	0.308127	0.00261424	0.0440014	0.0816412	0.0749615	0	0.0946167	0	0.0679769	0.00424665	0.122462	0	0.0468632	0.00221083	0.0177605	0.0892585	0.203281	0.0873306	0	0.0607749	0	0	0	0.00144664	0.024349	0.0451777	0.0414813	0	0.0523579	0	0.0376163	0.00234996	0.0677666	0	0.0259326	0.0012234	0.0098281	0.0493928	0.112489	0.048326	0	0.0336309	0	0
TCGA-86-A4P8	0.00984359	0.396105	0.452605	0.259662	0.381589	0.753252	0.00184921	0.0172093	0	0.0993121	0	0.251408	0	0.0190146	0.000110111	0	0	0.0448555	0.0255285	0.0924081	0.0468262	0.349245	0.000365728	0	0.0516721	0	0	0.000195138	0.00197618	0.0183909	0	0.106131	0	0.26867	0	0.0203202	0.000117672	0	0	0.0479354	0.0272814	0.098753	0.0500413	0.373225	0.000390839	0	0.05522	0	0
TCGA-86-A4D0	0.0559123	0.0266748	0.0504459	0.0235341	0	0.0850229	0.00308098	0	0.105182	0.0366225	0	0.143031	0.0757177	0.0244666	0	0.0033746	0	0.125623	0.0204221	0	0.0642604	0.317674	0.0396814	0.0122865	0.0285776	0	0	0	0.00118238	0	0.0403657	0.0140546	0	0.0548907	0.0290581	0.00938951	0	0.00129507	0	0.04821	0.00783737	0	0.0246611	0.121913	0.0152285	0.00471519	0.0109672	0	0
TCGA-55-8085	0.180543	0.0871683	0.136072	0.0773824	0	0.448602	0.00495348	0.0385619	0.063458	0.133047	0	0.111551	0	0.0921261	0.050808	0	0	0.0607728	0.0546331	0.0907892	0.078019	0.206577	0	0.00052452	0	0.0141783	0	0	0.00350999	0.0273245	0.0449657	0.0942758	0	0.079044	0	0.0652795	0.036002	0	0	0.0430629	0.0387124	0.0643322	0.0552834	0.146378	0	0.000371669	0	0.0100466	0
TCGA-50-5935	0.0953671	0.126019	0.448522	0.160164	0.181993	0.710645	0	0.00282475	0	0.0483142	0	0.206599	0	0	0	0	0.07782	0.000699338	0.0537107	0.150934	0.0863971	0.238222	0.00401526	0	0.127444	0	0	0.0030207	0	0.00215463	0	0.0368526	0	0.157587	0	0	0	0	0.0593588	0.000533434	0.0409689	0.115128	0.0659011	0.181708	0.00306272	0	0.0972101	0	0
TCGA-53-7813	0.105846	0.0196519	0.111072	0.049629	0	0.0252295	0	0.0206287	0.380322	0.188689	0	0.053497	0.0328486	0.0674898	0.0251485	0	0	0.0515926	0.0096092	0.0312751	0.0321792	0.0590698	0	0.034279	0	0.013372	0	0	0	0.00800277	0.147544	0.0732006	0	0.0207538	0.0127434	0.0261823	0.00975623	0	0	0.020015	0.00372783	0.012133	0.0124837	0.0229158	0	0.0132983	0	0.00518758	0
TCGA-73-4662	0.128342	0.206939	0.163895	0.0988575	0	0.589024	0	0.0685297	0.116785	0.0817129	0	0.178575	0	0.0459518	0.0445732	0	0	0.043953	0.123107	0.0125588	0.0234776	0.171755	0.0444501	0.0283004	0.012866	0.00340458	0	0	0	0.0661701	0.112764	0.0788994	0	0.172426	0	0.0443696	0.0430385	0	0	0.0424396	0.118868	0.0121264	0.0226693	0.165841	0.0429196	0.027326	0.012423	0.00328736	0
TCGA-62-8399	0	0.0558116	0.130407	0.139725	0	0.324646	0.0168034	0	0.07677	0.108853	0	0.134081	0.0112206	0.0555971	0.00310812	0	0.0109767	0.0385445	0.112549	0	0.0290662	0.231377	0	0.0704915	0.0268974	0.0433609	0	0.0303041	0.0105452	0	0.0481783	0.0683123	0	0.0841448	0.0070417	0.0348909	0.00195055	0	0.00688861	0.0241892	0.0706322	0	0.018241	0.145204	0	0.0442381	0.0168799	0.0272119	0
TCGA-44-7671	0.0322638	0.018048	0.0471696	0	0	0.269752	0	0.0151301	0.232122	0.0410437	0	0.0984061	0	0.0333763	0	0	0	0.0195033	0.0130847	0.0629137	0.00791291	0.367792	0.00102297	0.0482388	0.0508763	0	0	0.00857705	0	0.00460033	0.0705769	0.0124794	0	0.0299205	0	0.0101481	0	0	0	0.00592999	0.00397842	0.019129	0.00240593	0.111828	0.000311035	0.0146671	0.015469	0	0
TCGA-97-7552	0.347505	0.38859	0.589118	0.270762	0.111652	0.815703	0.00145531	0.0931753	0.073756	0.254409	0	0.122385	0	0.0301948	0.0174349	0	0	0.0584473	0.0196532	0.0429115	0.106126	0.134648	0.0203392	0	0.0250641	0	0	0	0.00213428	0.136647	0.108167	0.373104	0	0.179485	0	0.0442823	0.0255692	0	0	0.0857162	0.0288226	0.0629321	0.155639	0.197469	0.0298285	0	0.0367579	0	0
TCGA-44-6145	0	0.101197	0.380797	0.268347	0.141602	0.720485	0.00681343	0	0.0408448	0.0768131	0	0.13861	0	0.0222707	0	0	0.0160396	0.0323548	0.0552762	0.180994	0.0047521	0.202867	0	0.0516089	0.12968	0	0	0.0410757	0.00524969	0	0.0314706	0.0591839	0	0.106798	0	0.0171594	0	0	0.0123584	0.0249291	0.0425899	0.139454	0.00366145	0.156308	0	0.0397642	0.0999171	0	0
TCGA-44-7670	0.0780761	0.063392	0.0952158	0.0757238	0	0.395984	0.00637249	0.0302595	0.0695342	0.109704	0	0.0180184	0.0125577	0.123375	0	0	0	0.092118	0.0156107	0.233285	0.0875668	0.163093	0	0	0	0.0362398	0	0.00226526	0.00355789	0.0168945	0.0388223	0.06125	0	0.01006	0.00701121	0.0688825	0	0	0	0.0514313	0.00871575	0.130248	0.0488903	0.0910583	0	0	0	0.0202334	0
TCGA-49-AARO	0.066218	0.314815	0.0222055	0.143643	0	0.772931	0.0177832	0.0506315	0.0299464	0.0729583	0	0.112673	0	0.0818616	0.0376056	0	0	0.0346788	0.0305966	0.172148	0.0339762	0.241908	0.0408278	0.0281784	0	0.0104169	0	0.00381085	0.0187498	0.0533835	0.031574	0.0769238	0	0.118797	0	0.0863111	0.0396496	0	0	0.0365637	0.0322597	0.181504	0.0358229	0.255056	0.0430469	0.0297099	0	0.0109831	0
TCGA-44-2657	0.662043	0.440487	0.233809	0.219908	0.0362464	0.969788	0.110252	0.0689617	0.0221394	0.114689	0	0.110052	0	0.0917026	0.0167232	0	0	0.0474323	0.0476891	0.0215155	0.0208185	0.217385	0.00297492	0.0233083	0.0650394	0	0	0.019318	0.151945	0.095041	0.0305119	0.158061	0	0.15167	0	0.126382	0.0230474	0	0	0.0653697	0.0657236	0.029652	0.0286914	0.299594	0.00409995	0.0321227	0.0896353	0	0
TCGA-55-8204	0.0311112	0.117306	0.151159	0.202503	0.0374044	0.407123	0	0.0041103	0.283195	0.0773428	0	0.0826026	0	0.0242732	0.00127825	0	0	0.0355131	0.0142775	0.000598472	0.140033	0.205677	0.0166556	0	0.0751087	0	0	0.0393345	0	0.00258148	0.177861	0.0485752	0	0.0518786	0	0.0152448	0.000802808	0	0	0.022304	0.00896698	0.000375871	0.0879478	0.129175	0.0104606	0	0.047172	0	0
TCGA-64-1676	0.0563065	0	0.105372	0.105212	0.0736953	0.395715	0.00562589	0	0.0234545	0.113183	0	0.0605784	0	0.0293125	0.0177584	0	0	0.0398601	0.157312	0.0226738	0.0401288	0.430675	0.0394621	0	0.00468192	0.0152937	0	0	0.00215688	0	0.00899209	0.0433925	0	0.0232248	0	0.011238	0.00680827	0	0	0.0152817	0.0603108	0.00869278	0.0153847	0.165114	0.0151291	0	0.00179497	0.00586337	0
TCGA-91-8496	0.0107763	0.0244872	0.126998	0.0765222	0.0144776	0.420462	0.00273701	0.00165331	0	0.0673945	0	0.120664	0	0.00223937	0.0161644	0	0.0293781	0.00846736	0.112812	0.05013	0.0181905	0.372382	0.0555371	0	0.133952	0	0	0.00829822	0.00110413	0.00066696	0	0.0271875	0	0.0486768	0	0.000903378	0.00652083	0	0.0118514	0.0034158	0.0455092	0.0202229	0.0073382	0.150222	0.0224041	0	0.0540375	0	0
TCGA-35-3615	0.0282708	0	0.036506	0.0109897	0	0.0785335	0.0115319	0	0.100195	0.0811165	0	0.125573	0	0.0507717	0.00945508	0	0.000742739	0.00365039	0.0131538	0.0274858	0.0309603	0.449716	0.000276637	0.0274755	0.0586491	0	0	0.00924621	0.00318937	0	0.0277109	0.0224343	0	0.0347295	0	0.0140419	0.00261498	0	0.000205418	0.00100958	0.00363792	0.00760171	0.00856264	0.124377	7.65e-05	0.00759886	0.0162205	0	0
TCGA-55-8096	0.0810237	0.154806	0.111157	0.127024	0.131176	0.619723	0	0.02021	0.133592	0.0391561	0	0.0744673	0	0	0.0186742	0	0	0.00749777	0.0262103	0.268895	0.0268289	0.349248	0	0	0.0352197	0	0	0	0	0.014683	0.0970577	0.0284478	0	0.0541022	0	0	0.0135672	0	0	0.0054473	0.0190424	0.195359	0.0194918	0.253737	0	0	0.0255879	0	0
TCGA-67-6215	0.00361029	0.132208	0.0271579	0.0660128	0.0745787	0.352165	0	0.0207367	0.00379819	0.0231016	0	0.128699	0	0.00464823	0.00553557	0	0	0.0183002	0.0092954	0.102294	0.0227874	0.420534	0.0810581	0	0.133592	0	0	0.0256195	0	0.00724178	0.00132642	0.00806765	0	0.044945	0	0.00162328	0.00193316	0	0	0.0063909	0.00324619	0.0357237	0.00795792	0.146861	0.0283075	0	0.0466538	0	0
TCGA-53-A4EZ	0.079196	0.0674354	0	0.0250855	0	0.118311	0.04503	0.0341682	0.0594002	0.10163	0	0.123622	0	0.13031	0.00932974	0	0	0.0737426	0.0321692	0	0.0687762	0.224146	0.0561884	0	0.0405031	0	0	0.000984332	0.0155243	0.0117796	0.0204785	0.0350374	0	0.0426192	0	0.0449251	0.00321647	0	0	0.0254231	0.0110905	0	0.0237109	0.0772752	0.0193712	0	0.0139636	0	0
TCGA-MP-A4SY	0.0577811	0.12727	0.0420512	0.0692129	0.0587852	0.543486	0.0165373	0	0.021339	0.017845	0	0.0866287	0	0.0186311	0.0255773	0	0	0.0331593	0.00528046	0.243348	0.048454	0.320777	0.0929946	0	0.0684062	0	0	0.00102185	0.00795335	0	0.0102626	0.00858228	0	0.0416626	0	0.00896033	0.012301	0	0	0.0159474	0.00253955	0.117034	0.0233032	0.154272	0.0447242	0	0.0328988	0	0
TCGA-73-4676	0	0	0.497391	0.23283	0.200311	0.648408	0	0	0	0.136562	0	0.17969	0	0	0	0	0.0231847	0.0389711	0.0844558	0.142461	0	0.298291	0.00955528	0.0396634	0	0.0458192	0	0.00134627	0	0	0	0.081604	0	0.107375	0	0	0	0	0.0138542	0.0232875	0.0504673	0.0851288	0	0.178247	0.00570985	0.0237012	0	0.0273797	0
TCGA-86-8075	0.022488	0.108734	0.117287	0.283881	0.159857	0.587565	0.0119611	0.000774008	0.119637	0.0134082	0	0.125977	0	0.0392338	0.0149067	0	0	0.0204809	0.00526861	0.0957068	0.0618095	0.37365	0.00552508	0.0394747	0	0.0441832	0	0.0280025	0.0108802	0.000704061	0.108826	0.0121965	0	0.114593	0	0.0356882	0.0135596	0	0	0.0186301	0.00479249	0.0870579	0.0562238	0.339884	0.00502579	0.0359074	0	0.0401904	0
TCGA-78-8660	0.0496701	0.200187	0.207844	0.11122	0.0646851	0.430341	0.0160408	0.00501671	0	0.125305	0	0.0996329	0.00376371	0.141838	0.0210442	0	0	0.0779369	0.00215163	0.110702	0.100105	0.262712	0.00432056	0	0	0.0270914	0	0.0023393	0.0119998	0.00375291	0	0.0937383	0	0.0745337	0.00281556	0.106107	0.0157428	0	0	0.0583033	0.0016096	0.082814	0.0748872	0.196531	0.00323214	0	0	0.0202666	0
TCGA-91-6840	0.11721	0.199689	0.0716815	0.10255	0	0.270418	0.057164	0	0.00951977	0.118872	0	0.161624	0	0.0440364	0.0101112	0	0	0.0516763	0.0346319	0.0731927	0.17625	0.223486	0.00299735	0	0.0364373	0	0	0	0.0435855	0	0.00725849	0.0906359	0	0.123233	0	0.0335762	0.00770944	0	0	0.0394013	0.0264056	0.0558068	0.134384	0.1704	0.00228537	0	0.0277821	0	0
TCGA-44-2665	0	0.186306	0.213648	0.192972	0.24374	0.534996	0.0120666	0	0	0.0553735	0	0.136561	0	0.0303199	0.0109145	0	0.0268367	0.0216013	0.12459	0.0598071	0.0202357	0.38985	0.00172284	0	0.0858417	0	0.000942886	0.023336	0.00737266	0	0	0.033833	0	0.0834384	0	0.0185254	0.00666872	0	0.0163971	0.0131983	0.0761239	0.0365419	0.0123639	0.238197	0.00105265	0	0.052449	0	0.0005761
TCGA-75-7025	0.232111	0.201825	0.137176	0.0716663	0.0469019	0.583005	0	0.0843041	0.0492024	0.0766665	0	0.136466	0	0.070452	0.0220047	0	0	0.0548615	0.0789266	0	0	0.197543	0.0839139	0.0651295	0.0805296	0	0	0	0	0.0757903	0.0442336	0.0689241	0	0.122685	0	0.0633371	0.0197825	0	0	0.0493211	0.070956	0	0	0.177594	0.0754396	0.0585521	0.0723971	0	0
TCGA-44-A479	0.248377	0.285054	0.360995	0.207477	0.172264	0.614534	0.00813809	0.0166732	0.157957	0.106639	0	0.162676	0.0165855	0.0528915	0.0265018	0.0203672	0	0.0194882	0.000171694	0.0421512	0.132041	0.226856	0	0	0.0108628	0	0	0	0.00976061	0.0199975	0.189449	0.1279	0	0.195109	0.0198922	0.0634367	0.0317856	0.0244279	0	0.0233736	0.000205926	0.0505551	0.158366	0.272086	0	0	0.0130286	0	0
TCGA-78-7146	0	0.0166307	0.179303	0.160374	0	0.463192	0.0108136	0	0.0319458	0.0970693	0	0.122698	0.057748	0.034142	0	0	0	0.0414751	0.019798	0.133836	0.058629	0.251073	0	0.0313137	0	0.107995	0	0.00146485	0.0044163	0	0.0130467	0.0396433	0	0.0501099	0.0235844	0.0139436	0	0	0	0.0169385	0.00808556	0.0546588	0.0239442	0.102539	0	0.0127886	0	0.0441053	0
TCGA-91-8499	0.176034	0	0.0701321	0.072325	0.0472351	0.230098	0	0.106957	0	0.093261	0	0.0523742	0.00523487	0.113973	0	0.020738	0	0.0582906	0.0182306	0.0439054	0.108593	0.305955	0.0244036	0	0.0480826	0	0	0	0	0.0506815	0	0.0441915	0	0.0248174	0.00248053	0.0540059	0	0.00982664	0	0.0276208	0.00863854	0.0208044	0.0514566	0.144976	0.0115636	0	0.0227838	0	0
TCGA-55-6970	0.0543252	0.30726	0.604473	0.334755	0.330928	0.869526	0.0135461	0	0	0.0740412	0	0.34941	0	0.0143961	0	0	0.0147915	0.0215948	0.104571	0.0662876	0.0851658	0.185695	0	0.0154675	0.0406291	0	0	0.0144035	0.0178102	0	0	0.0973483	0	0.4594	0	0.0189278	0	0	0.0194477	0.0283926	0.137489	0.0871541	0.111975	0.24415	0	0.0203365	0.0534186	0	0
TCGA-05-4420	0.0439646	0.0247124	0.00729095	0.0428245	0	0.104884	0.0142366	0	0.129684	0.102886	0	0.0958047	0	0.0434418	0.0140478	0	0.0189738	0.00981376	0.00695003	0.0494061	0.00457192	0.328413	0.00733302	0.0219966	0	0.0296979	0	0.122744	0.00498289	0	0.04539	0.0360107	0	0.0335322	0	0.0152049	0.00491681	0	0.00664094	0.00343488	0.00243255	0.0172924	0.0016002	0.114946	0.0025666	0.00769893	0	0.0103945	0
TCGA-86-7701	0.229812	0.16426	0.376671	0.142623	0.0329725	0.412245	0.0131985	0.0293435	0.190181	0.0932379	0	0.279698	0.0162766	0.0743166	0.0296613	0	0	0.0186846	0.00484509	0.0284462	0.033179	0.160495	0	0.0132003	0.00845177	0.00123888	0	0.00554596	0.0124637	0.0277099	0.179593	0.0880471	0	0.264126	0.0153705	0.0701792	0.02801	0	0	0.0176444	0.00457535	0.0268625	0.0313318	0.15156	0	0.0124654	0.00798124	0.00116991	0
TCGA-NJ-A55R	0.162823	0.128143	0	0.00743086	0	0.226347	0	0.124141	0.230321	0.0235965	0	0.0385839	0	0.0781338	0.0318709	0	0	0.0252798	0	0.22663	0.010856	0.155326	0	0	0.0552616	0	0	0	0	0.0654414	0.121415	0.012439	0	0.0203397	0	0.0411886	0.0168009	0	0	0.0133264	0	0.119469	0.00572278	0.0818808	0	0	0.0291314	0	0
TCGA-05-4397	0	0.0478745	0.0487791	0.11177	0.255183	0.319882	0.00972562	0	0.0152457	0.0388846	0	0.00874955	0	0.0357513	0.0118285	0	0.00533116	0.0146338	0.00529857	0.24032	0.106146	0.365176	0	0.0904076	0.0371402	0	0	0.015361	0.0046287	0	0.00725587	0.0185063	0	0.00416415	0	0.017015	0.00562952	0	0.00253725	0.00696463	0.00252174	0.114375	0.0505179	0.173797	0	0.0430275	0.0176761	0	0
TCGA-53-7626	0.304788	0.202281	0.42832	0.295662	0.167398	0.806421	0	0.0421038	0.0789134	0.105692	0	0.214624	0	0.0538269	0.000667068	0	0	0.0387172	0.0378858	0.0178262	0.0670932	0.269346	0.0179517	0	0	0.0446847	0	0.0106681	0	0.0541365	0.101466	0.135898	0	0.275961	0	0.0692099	0.000857707	0	0	0.0497821	0.0487131	0.0229207	0.0862676	0.346321	0.0230821	0	0	0.057455	0
TCGA-95-7944	0	0.0537763	0.459998	0.194742	0	0.399646	0.00435447	0	0.00576813	0.244654	0	0	0.127952	0.131689	0	0	0	0.150642	0.00701531	0.0616754	0.111477	0.142156	0	0.00259006	0	0.0100273	0	0	0.00297281	0	0.00393793	0.167026	0	0	0.0873533	0.0899045	0	0	0	0.102844	0.00478938	0.0421061	0.0761059	0.0970504	0	0.00176825	0	0.00684566	0
TCGA-73-A9RS	0.0452535	0.0217468	0.0324958	0.00946498	0	0.151477	0.0311634	0	0.0655817	0.157082	0	0.0928197	0.0256478	0.134501	0.00327555	0	0.0101135	0.00814952	0.00183445	0.0495008	0.0711988	0.284086	0	0	0.0650466	0	0	0	0.00969195	0	0.0203962	0.0488531	0	0.0288673	0.00797655	0.0418302	0.00101871	0	0.00314534	0.00253453	0.00057052	0.0153949	0.0221431	0.0883518	0	0	0.0202297	0	0
TCGA-44-7667	0.0170538	0.0141608	0.00102337	0.0234664	0	0.128766	0	0.00522456	0.056926	0.0776386	0	0.0632255	0	0.0124849	0.0136515	0	0	0.092926	0.00821825	0.334443	0.0759231	0.205164	0	0	0	0.054175	0	0	0	0.0016742	0.0182418	0.0248791	0	0.0202604	0	0.00400075	0.00437459	0	0	0.0297779	0.00263351	0.107171	0.0243293	0.0657441	0	0	0	0.0173602	0
TCGA-NJ-A55O	0.0446012	0.124403	0.0259881	0.0681656	0.0495893	0.402913	0	0.0283161	0.00751352	0.044567	0	0.199985	0	0.0485886	0.015166	0	0	0.0304296	0.00730574	0.083153	0.0581275	0.408439	0.00491489	0.00914722	0.0473646	0	0	0.00698243	0	0.0140165	0.0037192	0.0220607	0	0.0989925	0	0.0240514	0.00750718	0	0	0.0150627	0.00361634	0.0411608	0.0287731	0.202178	0.00243287	0.00452787	0.0234455	0	0
TCGA-55-8301	0.241496	0.27219	0.119092	0.172688	0	0.627913	0	0.0480254	0.0447563	0.0881569	0	0.118865	0.0239356	0.0423443	0.0517242	0	0.00254434	0.0331023	0.00325381	0.164682	0.206054	0.115216	0.0172177	0	0.0401215	0	0	0	0	0.0406687	0.0379004	0.0746527	0	0.100657	0.0202691	0.0358578	0.0438009	0	0.00215459	0.0280315	0.00275538	0.139456	0.17449	0.0975667	0.0145802	0	0.0339756	0	0
TCGA-05-4415	0	0	0.135522	0.0715478	0	0.393471	0.0443583	0	0.122864	0.208182	0	0.0204972	0.0423007	0.063361	0	0	0.0339413	0.0547595	0.0195919	0.0434998	0.126219	0.170343	0	0.000300516	0	0.0370829	0	0.0126992	0.0154924	0	0.0429108	0.0727087	0	0.00715875	0.0147737	0.0221291	0	0	0.0118542	0.019125	0.00684258	0.0151925	0.0440825	0.0594931	0	0.000104957	0	0.0129514	0
TCGA-91-6835	0.0269608	0.130992	0.235002	0.0861777	0.0490413	0.511619	0.0393852	0	0.0243709	0.0955833	0	0.128256	0	0.0571525	0	0	0	0.0308591	0.0443386	0.0464495	0.0758384	0.349264	0	0.000737881	0.10051	0.00722926	0	2.5e-05	0.0323703	0	0.0200302	0.0785588	0	0.105412	0	0.046973	0	0	0	0.0253628	0.0364413	0.0381763	0.0623307	0.287056	0	0.000606456	0.0826076	0.00594164	0
TCGA-55-7725	0.0821327	0.098725	0.238111	0.122181	0.00794934	0.294799	0.0826231	0	0.0238414	0.0724275	0	0.168759	0.00827186	0.0543457	0.00344775	0.0362175	0	0	0.00732968	0.0480652	0.127965	0.211509	0.0301068	0.0099637	0.111675	0	0	0.00345151	0.0478433	0	0.0138055	0.0419395	0	0.0977208	0.00478986	0.0314692	0.00199643	0.0209719	0	0	0.00424428	0.0278324	0.0740989	0.122475	0.0174335	0.00576953	0.0646659	0	0
TCGA-55-8506	0	0.138987	0.0282186	0.107621	0	0.427065	0	0.00577196	0.0614855	0.0608396	0	0.032806	0	0.0633025	0.000762409	0.0053194	0	0.0294425	0.0347062	0.305196	0.0510981	0.31084	0.0010306	0	0	0.0373993	0	0	0	0.00278167	0.0296315	0.0293203	0	0.0158101	0	0.0305072	0.000367426	0.00256356	0	0.0141891	0.0167258	0.147082	0.0246256	0.149802	0.000496675	0	0	0.0180237	0
TCGA-50-5931	0	0	0.456592	0.285149	0.0600563	0.6728	0.00651568	0.00719186	0.00972061	0.0573578	0	0.164132	0	0	0	0	0.0520455	0.0466408	0.0257921	0.0768082	0.000282424	0.288617	0	0.0490593	0	0.215837	0	0	0.00375767	0.00414763	0.005606	0.033079	0	0.0946567	0	0	0	0	0.0300153	0.0268983	0.0148746	0.0442963	0.000162878	0.166449	0	0.0282931	0	0.124476	0
TCGA-55-A494	0.061211	0.0731822	0	0.00257361	0	0.094792	0.0206747	0	0.094236	0.17472	0.0484016	0	0	0.0446482	0.108221	0	0	0.0323	0.0205971	0.138048	0	0.195538	0	0.117724	0	0.000926025	0	0.0039645	0.00325218	0	0.0148235	0.0274839	0.00761368	0	0	0.00702326	0.0170235	0	0	0.00508087	0.00323997	0.0217153	0	0.0307586	0	0.0185182	0	0.000145666	0
TCGA-50-5930	0.0597949	0.121599	0.329869	0.198671	0.263826	0.595798	0	0.00831565	0.0231401	0.0770125	0	0.066813	0	0	0	0	0.05552	0	0.070073	0.082892	0	0.474858	0	0.0518673	0.0760697	0	0	0.0134384	0	0.00409011	0.0113816	0.0378791	0	0.0328624	0	0	0	0	0.0273078	0	0.0344659	0.040771	0	0.233562	0	0.0255113	0.0374154	0	0
TCGA-38-4627	0	0.0496372	0.391967	0.220548	0.323541	0.554702	0	0.00442849	0	0.0398834	0	0.193212	0	0	0	0	0.0307534	0.0174853	0.0950445	0.0658567	0.0159598	0.386093	0	0.0429405	0.103221	0	0	0.00512142	0	0.00307364	0	0.0276815	0	0.134101	0	0	0	0	0.0213447	0.0121359	0.0659666	0.0457085	0.0110771	0.267972	0	0.0298033	0.0716416	0	0
TCGA-67-4679	0.00882262	0.150616	0.160767	0.113214	0.0794581	0.36266	0	0.00942459	0	0.0795479	0	0.146507	0	0.00626652	0.018988	0	0	0.0229661	0.157386	0	0.016231	0.238402	0.0885577	0.00602406	0.209699	0	0	0	0	0.00637818	0	0.0538348	0	0.0991498	0	0.00424093	0.0128503	0	0	0.0155425	0.106513	0	0.0109844	0.161341	0.0599322	0.00407684	0.141916	0	0
TCGA-55-7903	0	0.0972915	0.121137	0.112579	0	0.218695	0.0363286	0	0.00971088	0.143179	0	0.0835482	0.0180894	0.0933429	0.00511042	0	0.00426221	0.0368989	0.0380808	0.029913	0.126526	0.257295	0.0330237	0.0420654	0	0.0413057	0	0.00131985	0.0202058	0	0.00540114	0.0796354	0	0.0464691	0.0100612	0.0519168	0.00284239	0	0.00237062	0.020523	0.0211803	0.0166375	0.0703734	0.143106	0.0183676	0.0233965	0	0.022974	0
TCGA-55-8619	0.192635	0.356843	0.174558	0.157353	0.162424	0.666436	0.0320166	0.0400244	0.0630063	0.157452	0	0.0753562	0	0.0751046	0.0307671	0	0	0.0528603	0.0315034	0.0877181	0.0245058	0.247893	0.00258783	0	0.0601293	0	0	0.0190755	0.0354581	0.0443266	0.0697788	0.174376	0	0.0834562	0	0.0831776	0.0340743	0	0	0.0585423	0.0348897	0.0971468	0.0271399	0.274538	0.00286599	0	0.0665925	0	0
TCGA-05-5428	0	0	0.0277305	0.054912	0.00539109	0.113644	0.0222426	0	0.0167378	0.0674338	0	0.0682569	0	0.0264536	0	0	0	0.0142448	0.00791445	0	0.0312827	0.566398	0.0440598	0	0.0992631	0.0161734	0	0.0195393	0.00571126	0	0.00429778	0.017315	0	0.0175264	0	0.0067925	0	0	0	0.00365764	0.0020322	0	0.00803247	0.145434	0.0113133	0	0.0254879	0.00415286	0
TCGA-55-7724	0.039269	0.0113013	0.419673	0.215785	0.225551	0.538531	0.0425971	0	0.0758242	0.0571243	0	0.0637513	0.00197763	0.0233358	0	0.0706249	0	0.00493009	0	0.0393807	0.103097	0.398442	0.0163751	0.00538585	0.0574377	0	0	0.0397158	0.0289015	0	0.0514457	0.038758	0	0.0432544	0.00134179	0.015833	0	0.047918	0	0.00334499	0	0.0267193	0.06995	0.270337	0.0111103	0.00365422	0.0389707	0	0
TCGA-97-7938	0.0326712	0.0733331	0.229881	0.138137	0.0169672	0.377561	0.0950959	0	0.0515072	0.0954709	0	0.105443	0	0.0522221	0	0.00898717	0	0.0546149	0.000543584	0.0798129	0.0359984	0.298926	0.027316	0.00509364	0.0645242	0.00712188	0	0.017322	0.0593789	0	0.0321617	0.0596131	0	0.0658398	0	0.032608	0	0.00561168	0	0.0341021	0.000339419	0.049836	0.0224778	0.186653	0.0170564	0.00318053	0.0402896	0.00444698	0
TCGA-50-6590	0.179072	0.350509	0.00877887	0.181099	0	0.728386	0	0.0229396	0.123556	0.102198	0	0.0760444	0.00564613	0.0442979	0.017299	0	0	0.0742002	0	0.113748	0.129531	0.259499	0	0	0	0.0278896	0	0.00315191	0	0.022236	0.119767	0.099064	0	0.0737122	0.00547296	0.0429393	0.0167685	0	0	0.0719245	0	0.110259	0.125558	0.25154	0	0	0	0.0270342	0
TCGA-69-8255	0.0644339	0.0238452	0.332602	0.0759434	0	0.228791	0.0145394	0	0.0863268	0.303186	0	0	0.122121	0.12603	0	0.0147786	0	0.041873	0.0005274	0.0418463	0.0807733	0.160015	0.000951216	0	0	0.00703179	0	0	0.00786989	0	0.0467269	0.164108	0	0	0.0661019	0.0682175	0	0.00799934	0	0.022665	0.000285471	0.0226505	0.0437209	0.0866129	0.000514874	0	0	0.00380617	0
TCGA-73-7498	0.0623858	0.240496	0.0424145	0.0384628	0.0074542	0.360932	0	0.0276901	0.144949	0.0835581	0	0.199724	0	0.0378515	0.0510196	0	0	0.0399254	0.0798381	0	0.0199514	0.20131	0.00237979	0.0102577	0.101546	0	0	0	0	0.0192586	0.100813	0.0581151	0	0.138909	0	0.0263259	0.0354844	0	0	0.0277683	0.0555278	0	0.0138763	0.140012	0.00165515	0.00713431	0.0706258	0	0
TCGA-78-7148	0.0313874	0.0593728	0.119477	0.0395117	0	0.271839	0.017842	0	0.0829838	0.178389	0	0.152008	0	0.0597094	0.0628624	0	0	0.049066	0.0294841	0.036775	0.045581	0.21295	0.0323889	0.00158395	0.036825	0	0	0.00155125	0.00803319	0	0.0373627	0.0803181	0	0.0684403	0	0.0268836	0.0283032	0	0	0.0220915	0.0132749	0.0165576	0.0205224	0.0958788	0.0145828	0.000713158	0.0165801	0	0
TCGA-95-A4VN	0.0981825	0.114225	0.284895	0.19986	0.0160221	0.659643	0.00114697	0.0231132	0	0.138929	0	0.152658	0.00171246	0.0877789	0.0108136	0	0	0.0551598	0.0198599	0.0450521	0.117696	0.29769	0.00411616	0.00603218	0.0253791	0	0	0.0128628	0.00108304	0.021825	0	0.131186	0	0.144149	0.00161701	0.0828866	0.0102109	0	0	0.0520855	0.018753	0.0425412	0.111137	0.281099	0.00388675	0.00569598	0.0239646	0	0
TCGA-78-7152	0.127917	0.151085	0.0563047	0.0619757	0	0.251743	0	0.136455	0.0525473	0.13431	0	0.215181	0	0.0301171	0.0526519	0	0	0.0610326	0.00208118	0.0442013	0.0517233	0.178261	0.00985429	0	0.0278952	0	0	0.00368966	0	0.0717322	0.0276233	0.0706044	0	0.113117	0	0.0158321	0.0276783	0	0	0.0320839	0.00109404	0.0232359	0.0271901	0.0937089	0.00518024	0	0.0146641	0	0
TCGA-MP-A4TD	0.155559	0.202732	0	0.0529938	0	0.294088	0.00392574	0.105685	0.0899105	0.0673514	0	0.175172	0	0.0307823	0.0174476	0	0	0.0468545	0.00242874	0.210349	0.00961856	0.200922	0	0.00906714	0.0304857	0	0	0	0.00248122	0.0667968	0.056827	0.0425687	0	0.110715	0	0.0194557	0.0110276	0	0	0.0296139	0.00153506	0.132949	0.00607931	0.126991	0	0.00573079	0.0192682	0	0
TCGA-55-7914	0.130686	0.19122	0.0968773	0.0887631	0.0439137	0.361447	0	0.0325084	0.212833	0.129921	0	0.213888	0	0.0519781	0.0163514	0	0	0.0287342	0.00773	0	0.101041	0.167998	0	0.000667876	0.0363491	0	0	0	0	0.0194509	0.127345	0.0777358	0	0.127976	0	0.0311002	0.0097836	0	0	0.0171926	0.00462511	0	0.0604558	0.100519	0	0.000399612	0.0217488	0	0
TCGA-44-A47A	0.0436795	0.295356	0	0.0818558	0	0.687487	0.00559933	0.0184185	0	0.045444	0	0.114848	0	0.0521708	0.0785327	0	0.00708621	0.0288397	0	0.0742758	0.0219739	0.272707	0.188488	0.0462246	0.0453907	0	0	0	0.00388313	0.0127732	0	0.0315153	0	0.0796472	0	0.0361803	0.0544623	0	0.00491428	0.0200003	0	0.0515101	0.0152389	0.189122	0.130716	0.0320567	0.0314784	0	0
TCGA-97-A4M3	0.00445692	0.0254731	0.0646411	0.0688449	0	0.144736	0	0.014258	0.072387	0.0732137	0	0.212702	0	0.0849604	0.0119043	0	0	0.0553192	0.0321012	0	0	0.303546	0	0.0317618	0	0.107847	0	0	0	0.00447537	0.0227212	0.0229807	0	0.066764	0	0.0266678	0.00373658	0	0	0.0173639	0.0100761	0	0	0.0952787	0	0.00996957	0	0.0338515	0
TCGA-67-3773	0.121652	0	0.141507	0.0694075	0.0367273	0.389617	0.0160203	0	0	0.0867802	0	0.113125	0	0.0906726	0	0.0113346	0	0.0858191	0.0101132	0	0.0681688	0.312139	0.0881729	0.00268563	0.106869	0	0	0.0081006	0.00772288	0	0	0.041834	0	0.0545339	0	0.0437104	0	0.00546405	0	0.0413707	0.00487524	0	0.032862	0.150472	0.0425054	0.00129466	0.0515181	0	0
TCGA-50-6593	0.127418	0.115726	0.0964061	0.106618	0.0928913	0.682636	0	0.0263144	0.0288079	0.0324957	0	0.0921469	0	0.0262251	0.022925	0	0	0.0116036	0.0955326	0.172433	0.0132779	0.305277	0.0734878	0.0130378	0.076257	0	0	0.0101779	0	0.0154303	0.0168924	0.0190548	0	0.0540331	0	0.0153779	0.0134428	0	0	0.00680415	0.0560185	0.101111	0.00778592	0.179009	0.0430919	0.00764514	0.0447157	0	0
TCGA-73-4659	0.0258208	0.0439754	0.0547307	0.0874991	0.20889	0.286388	0.000995817	0	0.0466954	0.0380004	0	0.134805	0	0.00354663	0	0	0.045665	0	0.0509326	0.00571639	0.00088703	0.562236	0.0194799	0	0.0697393	0	0	0.0213011	0.000514695	0	0.0241348	0.0196408	0	0.0696747	0	0.0018331	0	0	0.0236023	0	0.0263249	0.00295456	0.000458468	0.290596	0.0100683	0	0.0360452	0	0
TCGA-38-4630	0.000275657	0.122182	0	0.0427858	0.100588	0.100735	0.0202825	0	0.0100402	0.101173	0	0.191604	0	0.0376207	0.029649	0	0	0.0425443	0.0108051	0.104529	0.091815	0.320897	6.89e-05	0.0150289	0	0.0239425	0	0	0.00902133	0	0.0044657	0.045	0	0.0852222	0	0.0167331	0.0131874	0	0	0.018923	0.00480593	0.0464928	0.0408378	0.14273	3.06e-05	0.00668459	0	0.0106492	0
TCGA-78-7540	0.0374603	0.145976	0.0305071	0.0366912	0.00592578	0.496858	0.00476091	0.0340334	0	0.0557107	0	0.0636719	0	0.0342742	0.0487035	0	0	0.0392208	0.000608927	0.229271	0.0320692	0.363716	0.000648529	0.00895408	0.0843565	0	0	0	0.00148555	0.0106195	0	0.0173835	0	0.0198676	0	0.0106946	0.015197	0	0	0.0122381	0.000190004	0.0715399	0.0100066	0.113491	0.000202361	0.00279395	0.0263219	0	0
TCGA-J2-A4AD	0.00761743	0	0.13654	0.0768406	0.0679591	0.279258	0	0	0.151005	0.203381	0	0	0	0.0303198	0.0159019	0	0	0	0.00968837	0.177423	0	0.225109	0.022393	0.0337696	0.124418	0	0	0.00659188	0	0	0.0502915	0.067735	0	0	0	0.0100979	0.00529604	0	0	0	0.00322666	0.0590897	0	0.0749713	0.00745788	0.0112468	0.0414367	0	0
TCGA-44-6778	0	0.0701629	0.555249	0.580704	0.0588587	0.889244	0.00873366	0	0	0.0520425	0	0.245398	0	0.00540587	0	0	0	0.0474088	0.0816381	0.0416914	0.0391978	0.132112	0	0.0403536	0	0.241846	0	0.0641712	0.0097718	0	0	0.0582286	0	0.274568	0	0.00604845	0	0	0	0.053044	0.0913421	0.046647	0.0438571	0.147816	0	0.0451503	0	0.270594	0
TCGA-38-A44F	0.178068	0.320832	0.0933233	0.152024	0.0788893	0.533567	0	0.0709916	0.0648174	0.0768543	0	0.103159	0	0.095997	0.0441516	0	0	0.0554415	0.016748	0.0330056	0.0834299	0.251331	0.046063	0	0.0559338	0	0	0.00207628	0	0.0802426	0.0732638	0.0868692	0	0.116601	0	0.108506	0.049905	0	0	0.0626661	0.0189304	0.0373066	0.0943017	0.284082	0.0520654	0	0.0632225	0	0
TCGA-50-6592	0	0.100043	0.39494	0.236661	0	0.700111	0.0510338	0	0.0446006	0.168112	0	0.102249	0.0122141	0.0438633	0.00315346	0	0	0.0602938	0.00782331	0.182997	0.104893	0.173576	0	0	0	0.0372037	0	0.00798714	0.0480378	0	0.0419823	0.158243	0	0.0962461	0.0114971	0.0412882	0.00296833	0	0	0.0567542	0.00736403	0.172253	0.0987355	0.163386	0	0	0	0.0350196	0
TCGA-95-8494	0.0527191	0.149925	0	0.102978	0	0.468158	0	0.0478703	0.000584204	0.0354478	0	0.111874	0	0.0377142	0.0297776	0	0	0.0288449	0.235308	0	0	0.237695	0.10859	0.0849642	0.0173655	0.023965	0	0	0	0.018281	0.000223099	0.013537	0	0.042723	0	0.0144025	0.0113717	0	0	0.0110155	0.0898607	0	0	0.0907724	0.0414688	0.0324466	0.00663164	0.00915191	0
TCGA-50-5055	0.741037	0.484126	0.19763	0.151767	0	0.82789	0.0587319	0.0663152	0.0800023	0.112584	0	0.195592	0	0.0433748	0.0271259	0.043041	0	0.0228897	0.00672363	0.089913	0.0347925	0.162992	0.0322688	0.00466688	0.0189852	0	0	0	0.0692341	0.0781734	0.094308	0.132716	0	0.230568	0	0.0511309	0.0319764	0.0507375	0	0.0269827	0.00792593	0.105991	0.041014	0.192138	0.038039	0.0055014	0.0223801	0	0
TCGA-75-5147	0.0739739	0.106841	0.090199	0.142219	0	0.418476	0.0174506	0.00319229	0.131987	0.0592395	0	0.145182	0.00204385	0.0225539	0.0431483	0.0136533	0	0.0232093	0.052557	0	0.0400729	0.316939	0.0264596	0.013402	0.0371434	0.0260576	0	0.0257076	0.0135349	0.00247598	0.102371	0.0459469	0	0.112605	0.00158523	0.017493	0.0334663	0.0105897	0	0.0180014	0.0407638	0	0.031081	0.245822	0.0205224	0.0103948	0.0288089	0.0202106	0
TCGA-86-8278	0.0933579	0.158551	0.0331268	0.182965	0.0528532	0.489971	0	0.0130958	0.121187	0.0639706	0	0.178382	0	0.0456073	0.00486102	0	0	0.0445189	0.0256951	0.00333635	0.0507199	0.223502	0.0553986	0.063697	0.10133	0	0	0.00469795	0	0.00808569	0.0748241	0.039497	0	0.110138	0	0.0281591	0.00300132	0	0	0.0274871	0.0158648	0.00205995	0.0313157	0.137995	0.0342045	0.0393281	0.0625636	0	0
TCGA-05-4250	0	0.0447193	0.368084	0.187224	0.122996	0.453538	0.0186105	0	0.0249025	0.205611	0	0.0226159	0.121359	0.0543891	0	0	0	0.0326464	0.0104029	0	0.0635688	0.389299	0	0	0	0.0507157	0	0.00587958	0.0128589	0	0.0172064	0.142066	0	0.0156264	0.0838528	0.0375801	0	0	0	0.022557	0.00718784	0	0.0439227	0.268985	0	0	0	0.0350419	0
TCGA-4B-A93V	0.0963389	0.0415602	0.0261613	0.0196121	0	0.170615	0	0.00988617	0.173666	0.116631	0	0.0272406	0	0.106479	0.0292386	0	0	0.0624817	0.0100164	0.317886	0.0295833	0.104402	0	0	0	0.0124904	0	0	0	0.00285661	0.0501808	0.0337004	0	0.00787117	0	0.030767	0.0084485	0	0	0.0180541	0.00289423	0.0918531	0.00854811	0.0301671	0	0	0	0.0036091	0
TCGA-86-7713	0.0458803	0.0784337	0.0542324	0.0572352	0	0.173995	0.0135325	0	0.187521	0.0279398	0	0.122879	0	0.1021	0.0032492	0	0	0.0345967	0.0308829	0.0809392	0.0661557	0.234211	0	0.066271	0.0114086	0	0	0.0183136	0.00646075	0	0.0895273	0.0133391	0	0.0586653	0	0.0487448	0.00155125	0	0	0.0165173	0.0147442	0.0386424	0.0315843	0.111818	0	0.0316394	0.00544673	0	0
TCGA-55-6982	0.0758336	0.328641	0.499221	0.240292	0.289517	0.876161	0.000144929	0	0	0.109442	0	0.240297	0	0.00986138	0	0	0.0231714	0.0222488	0.0601465	0.0654316	0.105099	0.242112	0.00263234	0	0.117935	0	0	0.00147813	0.000155761	0	0	0.117621	0	0.258256	0	0.0105984	0	0	0.0249031	0.0239116	0.0646417	0.0703218	0.112954	0.260207	0.00282907	0	0.126749	0	0
TCGA-67-6217	0.147963	0.176909	0.197907	0.0794879	0.00897459	0.438421	0	0.0729291	0.125883	0.138849	0	0.145396	0	0.0359151	0.0357946	0	0	0.0296611	0.0174563	0	0.0512914	0.230244	0.0637107	0.0141747	0.0359021	0	0	0.00279207	0	0.0567882	0.0980221	0.108119	0	0.113216	0	0.0279663	0.0278724	0	0	0.0230964	0.0135928	0	0.0399394	0.179286	0.04961	0.0110375	0.0279561	0	0
TCGA-49-4512	0.126819	0	0.300727	0.0943613	0.0708045	0.591763	0	0.00396041	0.0165402	0.0335288	0	0.190457	0	0.00865323	0	0	0.00453673	0.049432	0.0265162	0.0207963	0.0747515	0.373598	0.0690428	0	0.122524	0	0	0.00566302	0	0.00187105	0.00781424	0.0158403	0	0.0899792	0	0.00408813	0	0	0.00214333	0.0233536	0.0125273	0.00982501	0.0353156	0.176503	0.0326185	0	0.057885	0	0
TCGA-64-5774	0.0467058	0.0803643	0	0.0241172	0	0.127563	0.00984763	0	0.238038	0.0546919	0	0.178537	0	0.0517238	0.0821936	0	0	0.0368477	0	0.0625934	0	0.198222	0	0.00892725	0	0.0623871	0	0.0159911	0.00399363	0	0.0965343	0.0221799	0	0.0724042	0	0.0209762	0.033333	0	0	0.0149433	0	0.0253843	0	0.0803873	0	0.00362038	0	0.0253006	0
TCGA-97-8177	0.126416	0.068293	0.168488	0.144506	0.092301	0.653365	0.00959579	0.0318362	0.0392873	0.06844	0	0.10361	0	0.0729326	0.00973989	0	0	0.0613131	0.0503126	0.0495113	0.00516194	0.306044	0.0754964	0.0498658	0.0259078	0.0385158	0	0.00242987	0.00781602	0.0259314	0.0320005	0.0557461	0	0.0843926	0	0.0594055	0.0079334	0	0	0.0499411	0.0409809	0.0403283	0.00420453	0.249281	0.0614938	0.040617	0.0211026	0.0313721	0
TCGA-78-8640	0.0570246	0.0408417	0.112473	0.0768308	0	0.277374	0.00786355	0.00503055	0.0375818	0.145626	0	0.096376	0.0124847	0.0840361	0.010062	0	0	0.0708257	0.0253698	0.187637	0.0664278	0.233299	0.00320927	0	0.00582186	0.00555412	0	0.00279427	0.00354991	0.00227098	0.0169659	0.0657414	0	0.0435078	0.00563609	0.0379371	0.00454235	0	0	0.0319734	0.0114529	0.0847066	0.029988	0.10532	0.00144879	0	0.00262821	0.00250734	0
TCGA-95-7947	0.233139	0.133962	0.161339	0.133948	0.0279702	0.573668	0.041264	0	0.0537452	0.10191	0	0.225486	0	0.0786083	0.0061382	0	0	0.0211557	0.00990331	0.00812562	0.122181	0.282111	0	0.00234857	0.0430781	0	0	0.0039451	0.0302916	0	0.039454	0.0748114	0	0.165528	0	0.0577058	0.00450601	0	0	0.0155303	0.00726994	0.00596496	0.0896918	0.207096	0	0.00172407	0.0316233	0	0
TCGA-44-6777	0.117969	0.155388	0.442999	0.219537	0.178236	0.798207	0	0.0336413	0.0210817	0.0769894	0	0.129411	0	0.030367	0	0	0	0.0542044	0.120889	0.167401	0.020963	0.227994	0	0.0261888	0.0721319	0	0	0.0187375	0	0.0307726	0.019284	0.0704242	0	0.118376	0	0.0277775	0	0	0	0.0495821	0.11058	0.153126	0.0191754	0.208552	0	0.0239555	0.0659809	0	0
TCGA-55-7816	0	0.22928	0.233792	0.178951	0.34082	0.74059	0.00964208	0	0	0.101618	0	0.0227437	0	0.0171402	0.0047125	0.00425572	0	0.0269259	0.191171	0	0.0822668	0.51923	0	0	0.0202943	0	0	0	0.00773478	0	0	0.081517	0	0.0182447	0	0.0137497	0.00378032	0.00341389	0	0.0215996	0.153355	0	0.0659936	0.416521	0	0	0.0162799	0	0
TCGA-49-AAR4	0.076028	0.233917	0.60447	0.146349	0	0.556151	0.00829879	0.00864492	0.0714286	0.379198	0	0	0.0414295	0.085423	0.013174	0.117473	0	0.0106275	0	0.0583654	0.0564934	0.129967	0.00288569	0	1.12e-05	0.015256	0	0.00132508	0.00810712	0.00844525	0.0697788	0.37044	0	0	0.0404726	0.08345	0.0128698	0.114759	0	0.0103821	0	0.0570174	0.0551886	0.126965	0.00281905	0	1.1e-05	0.0149036	0
TCGA-55-7907	0	0.0927339	0.295135	0.117049	0.132706	0.422253	0.0107497	0	0.0553523	0.156812	0	0.11648	0	0.0660024	0.0281513	0	0	0.0326051	0.0237599	0.0529121	0.164403	0.250171	0.013818	0	0.0287836	0	0	0	0.00791077	0	0.040734	0.115398	0	0.0857178	0	0.0485714	0.0207167	0	0	0.0239942	0.017485	0.0389382	0.120985	0.184102	0.0101687	0	0.021182	0	0
TCGA-86-8359	0.029335	0.13	0.249453	0.211928	0	0.232546	0.00713983	0	0.0923052	0.266021	0	0.0745463	0.0153733	0.136762	0.0729304	0	0	0.0906078	0.0291353	0.0722591	0.0278222	0.02363	0	0	0	0.0620661	0	0.0294011	0.00497321	0	0.0642947	0.185296	0	0.0519248	0.0107082	0.0952607	0.0507992	0	0	0.0631123	0.020294	0.0503317	0.0193794	0.0164593	0	0	0	0.0432318	0
TCGA-50-5051	0.0528993	0.0452173	0	0.00812197	0	0.0630917	0.0304439	0.0461776	0.127138	0.103947	0	0.0350991	0	0.0783187	0.0692092	0	0	0.0477599	0.00808281	0.131096	0	0.17892	0.0248677	0.0507505	0.0547426	0.0134462	0	0	0.0103548	0.0157063	0.0432431	0.0353554	0	0.0119381	0	0.0266383	0.0235399	0	0	0.0162444	0.00274918	0.0445893	0	0.0608557	0.00845819	0.0172616	0.0186195	0.00457342	0
TCGA-05-4402	0.0588761	0.0911726	0.134268	0.122098	0.108752	0.460488	0.0181821	0.000647203	0.095415	0.0429409	0	0.104504	0	0.0300252	0.030628	0	0	0.0198999	0.00916946	0.0430883	0.0746488	0.413395	0.0106139	0.0302587	0.0503644	0	0	0.02622	0.0122934	0.000437591	0.0645127	0.0290335	0	0.0706577	0	0.0203009	0.0207084	0	0	0.0134548	0.00619972	0.0291332	0.050472	0.279507	0.00717633	0.0204587	0.0340527	0	0
TCGA-50-8459	0.124163	0.330222	0.0576177	0.177489	0.256939	0.803374	0.00258687	0.0425283	0.0302754	0.069732	0	0.0728779	0.00149541	0.0295323	0.0470441	0	0	0.0261034	0.121076	0.093212	0.0160295	0.330543	0.057406	0	0.0591978	0	0	0.000360295	0.00247111	0.0406252	0.0289206	0.0666116	0	0.0696167	0.00142849	0.0282107	0.0449389	0	0	0.0249353	0.115658	0.0890409	0.0153122	0.315751	0.0548372	0	0.0565488	0	0
TCGA-NJ-A7XG	0.0558817	0.0799582	0	0	0	0.113658	0	0.0105678	0.0525765	0.0846822	0	0.250852	0	0.030423	0.0283436	0	0	0.0864647	0.017984	0	0.0109129	0.150098	0.0358622	0.0348444	0.206388	0	0	0	0	0.00241922	0.012036	0.0193857	0	0.0574258	0	0.00696452	0.00648851	0	0	0.0197938	0.00411697	0	0.00249822	0.034361	0.00820968	0.00797669	0.0472471	0	0
TCGA-49-4488	0.0554943	0.116243	0.0745902	0.0612922	0	0.402222	0.00264158	0.0118311	0.0657275	0.151311	0	0.0845802	0	0.0467309	0.0500083	0	0	0.024743	0.0143988	0.0911144	0.0889502	0.289566	0.0638033	0	0.0061826	0.00841186	0	0	0.00127955	0.00573084	0.0318377	0.0732933	0	0.0409697	0	0.0226359	0.0242235	0	0	0.0119852	0.0069746	0.0441348	0.0430865	0.140262	0.0309056	0	0.00299478	0.00407461	0
TCGA-64-5815	0	0.1895	0.0737016	0.131776	0.0370226	0.808395	0	0.0384271	0.0208833	0.0271277	0	0.108136	0.00294541	0.0149366	0.0211402	0	0.00784551	0	0.022456	0.326715	0.00080806	0.311509	0.0149556	0.0488034	0.0332585	0	0	5.35e-05	0	0.0248577	0.013509	0.0175484	0	0.0699508	0.00190533	0.0096622	0.0136752	0	0.00507511	0	0.0145264	0.211345	0.000522718	0.201509	0.00967447	0.03157	0.0215143	0	0
TCGA-86-8056	0.124766	0.156257	0.240811	0.197093	0.177604	0.555939	0.00914761	0.0263714	0.0377178	0.0491761	0	0.202283	0	0.0177379	0.0097763	0	0	0.0300398	0.0240224	0.0738412	0.0405952	0.375215	0.0386094	0	0.046078	0.00806179	0	0.0113273	0.00827696	0.0238614	0.0341279	0.0444956	0	0.18303	0	0.0160497	0.00884581	0	0	0.0271806	0.0217359	0.0668131	0.0367314	0.339503	0.0349346	0	0.0416924	0.00729448	0
TCGA-78-8655	0.137759	0.166953	0.0531878	0.118849	0.0483804	0.50044	0.0130945	0	0.0126587	0.113712	0	0.134196	0	0.0421435	0.0171837	0	0	0.0183189	0.0369928	0.180511	0.102709	0.244572	0.0140935	0	0.0687057	0	0	0.00110865	0.00868087	0	0.00839193	0.0753839	0	0.0889639	0	0.0279386	0.0113918	0	0	0.0121443	0.024524	0.119668	0.06809	0.162137	0.00934317	0	0.0455478	0	0
TCGA-MP-A4TF	0.0585432	0.108955	0.0766378	0.119315	0	0.238988	0	0.00767515	0.269854	0.0861719	0	0.129174	0.0115579	0.0363414	0	0	0.0154661	0.0408191	0.000893946	0.112873	0.0616001	0.0904249	0	0.0725499	0	0.0479553	0	0.0166432	0	0.00362792	0.127556	0.0407321	0	0.0610583	0.00546323	0.017178	0	0	0.00731057	0.0192945	0.000422554	0.0533534	0.0291174	0.0427424	0	0.0342932	0	0.0226677	0
TCGA-55-8203	0.203488	0.208928	0.0537896	0.0800895	0	0.314164	0	0.0747225	0.191376	0.101065	0	0.176026	0	0.0807282	0.0501307	0	0	0.0229705	0.0116529	0.0381605	0.068712	0.154592	0.0090249	0.00796329	0.00915351	0	0	0.00372193	0	0.0564827	0.144661	0.0763953	0	0.133058	0	0.0610225	0.0378938	0	0	0.0173634	0.00880843	0.0288455	0.0519394	0.116856	0.00682193	0.00601946	0.00691914	0	0
TCGA-91-6848	0.0387025	0.155835	0.318189	0.278455	0.118434	0.85289	0.00104298	0	0.0414981	0.0938071	0	0.209534	0.0353385	0.0200776	0	0	0	0.0523037	0.0650025	0.094823	0.133409	0.245273	0.00321598	0	0	0.00338164	0	0.00129286	0.00123917	0	0.0493041	0.111453	0	0.248948	0.0419858	0.0238543	0	0	0	0.0621422	0.0772298	0.11266	0.158504	0.29141	0.00382092	0	0	0.00401774	0
TCGA-86-8073	0.0875178	0.111337	0.13863	0.111394	0.262273	0.377063	0.0296327	0	0.0254638	0.0561075	0	0.0973059	0	0.0451607	0.00458492	0	0	0.0210485	0.114475	0.0276571	0.0383173	0.463752	0	0	0.0764946	0	0	0	0.017731	0	0.0152365	0.0335724	0	0.0582238	0	0.0270223	0.00274343	0	0	0.0125946	0.0684973	0.0165489	0.0229275	0.27749	0	0	0.0457712	0	0
TCGA-64-5775	0	0.0726075	0.11812	0.0504348	0.17009	0.358454	0.00296683	0	0.0109599	0.0457748	0	0.0852955	0	0.0136451	0.0125312	0	0	0.0580686	0.0347074	0.138689	0.0123883	0.512101	0	0	0	0.065445	0	0.00742687	0.000665671	0	0.00245909	0.0102705	0	0.0191378	0	0.00306157	0.00281163	0	0	0.0130289	0.00778733	0.0311179	0.00277957	0.114901	0	0	0	0.014684	0
TCGA-44-7659	0.0643851	0.13258	0.050728	0.0708732	0	0.243325	0	0.0885964	0.0807109	0.0910666	0	0.173389	0	0.0326672	0.0272269	0	0	0.050133	0.0229124	0.0301701	0.0171049	0.270789	0.0104606	0.0286147	0.0665908	0	0	0.0095673	0	0.0539588	0.0491562	0.0554633	0	0.105601	0	0.0198957	0.0165823	0	0	0.0305331	0.0139546	0.0183748	0.0104176	0.164922	0.00637093	0.0174275	0.0405565	0	0
TCGA-55-A4DG	0.246178	0.208478	0.193447	0.0607824	0.116757	0.40455	0.0338001	0.129125	0.138537	0.121657	0	0.128784	0	0.0658808	0	0	0	0.0299781	0.0137156	0.0228349	0.0564762	0.215911	0	0	0.0433004	0	0	0	0.0257938	0.0985386	0.105722	0.0928402	0	0.0982785	0	0.0502756	0	0	0	0.0228772	0.0104668	0.0174259	0.0430986	0.164768	0	0	0.0330438	0	0
TCGA-55-6985	0.0655191	0.147674	0.323653	0.308987	0.105422	0.90599	0.000456358	0.0160707	0	0.0665047	0	0.147235	0	0.0284315	0	0	0	0.0344118	0.0769729	0.204245	0.0107524	0.305166	0.0105602	0.0198271	0.0315477	0.0406876	0	0.0071305	0.000421814	0.0148542	0	0.0614707	0	0.13609	0	0.0262794	0	0	0	0.031807	0.0711464	0.188785	0.00993852	0.282067	0.00976087	0.0183263	0.0291597	0.0376078	0
TCGA-86-8054	0	0	0.0684173	0.0260875	0	0.182317	0.00660602	0	0.032235	0.137212	0	0.201239	0	0.0331861	0	0	0	0	0.0301354	0.0476625	0	0.345386	0.0211068	0.050047	0.0840962	0	0	0.0110893	0.00217991	0	0.0106372	0.0452783	0	0.0664065	0	0.010951	0	0	0	0	0.00994435	0.0157281	0	0.113973	0.00696503	0.016515	0.0277508	0	0
TCGA-38-4629	0.0457093	0.00376024	0.205585	0.172392	0.108852	0.649613	0.0100158	0	0.0526706	0.0867179	0	0.0584687	0.0377135	0.0171397	0.00379518	8.44e-05	0	0.031154	0.0192423	0.0365438	0.0835502	0.53349	0.00509542	0	0	0.0145744	0	0.00974432	0.00663062	0	0.0348688	0.0574086	0	0.0387072	0.0249669	0.0113468	0.00251247	5.59e-05	0	0.0206244	0.0127387	0.0241925	0.0553115	0.353179	0.00337325	0	0	0.00964849	0
TCGA-78-7147	0.0476124	0.106821	0.0515207	0.0643999	0	0.288618	0.0381826	0	0	0.0902306	0	0.107477	0	0.0623084	0.0705473	0.0102407	0	0.039147	0.0252578	0.0119923	0.231063	0.189221	0.0157028	0.0144564	0.0941724	0	0	0	0.0168761	0	0	0.0398804	0	0.047503	0	0.0275393	0.0311807	0.00452623	0	0.0173023	0.0111635	0.00530041	0.102126	0.0836326	0.00694035	0.0063895	0.0416226	0	0
TCGA-55-8092	0.291849	0.25181	0.199149	0.155148	0	0.433687	0	0.0367386	0.265094	0.238821	0	0.0513471	0.00894038	0.0561537	0.013577	0	0	0.0663526	0.0101661	0	0.108213	0.144597	0	0	0	0	0	0	0	0.0312638	0.22559	0.203232	0	0.0436954	0.00760808	0.0477856	0.0115538	0	0	0.0564647	0.00865112	0	0.0920867	0.123049	0	0	0	0	0
TCGA-75-6205	0.218425	0.335443	0.328964	0.318601	0.333619	1.18652	0	0.0226363	0.00784146	0.0654924	0	0.230772	0.00311136	0.018042	0.00569203	0	0	0	0.00638398	0	0.106493	0.482067	0.0105827	0	0.0408863	0	0	0	0	0.0289742	0.010037	0.0838294	0	0.295385	0.0039825	0.0230935	0.00728572	0	0	0	0.00817141	0	0.136309	0.617039	0.0135457	0	0.0523339	0	0
TCGA-86-A456	0.00395964	0.0756552	0.152199	0.196945	0.0541851	0.506602	0.0188027	0.00416341	0.0170404	0.0379373	0	0.127396	0	0.0488382	0	0.0222887	0	0.0256597	0	0.1365	0.048668	0.318571	0	0.0184652	0	0.166623	0	0.00904587	0.0142074	0.00314589	0.0128758	0.0286656	0	0.0962606	0	0.0369023	0	0.0168414	0	0.0193886	0	0.10314	0.0367737	0.240713	0	0.0139524	0	0.125901	0
TCGA-55-8302	0.0452307	0.103431	0.0926899	0.115284	0.00314297	0.475449	0	0.0243682	0.0535482	0.125594	0	0.0610785	0	0.0897931	0.0143721	0	0	0.068443	0.065735	0.0616815	0.155233	0.265053	0.000371038	0.00208747	0.00112471	0.0115164	0	0	0	0.0139232	0.0305957	0.0717605	0	0.0348983	0	0.0513049	0.00821177	0	0	0.0391061	0.0375588	0.0352428	0.0886951	0.151443	0.000211999	0.00119272	0.000642623	0.00658007	0
TCGA-05-4384	0	0.122298	0.1354	0.0802344	0.151054	0.402016	0.00199765	0.0100454	0.0553853	0.0449135	0	0.0861864	0	0.0183599	0.00314311	0	0.00386416	0.0208352	0.0227507	0.123406	0.0226101	0.518632	0.0273224	0	0	0.0237189	0	0.0168296	0.00126308	0.00635156	0.0350191	0.028398	0	0.0544941	0	0.0116086	0.00198734	0	0.00244324	0.0131737	0.0143849	0.0780273	0.014296	0.327922	0.0172755	0	0	0.0149971	0
TCGA-55-8511	0.182782	0.270338	0.0830435	0.139792	0.0637274	0.478323	0.00992994	0.0597415	0.066544	0.109231	0	0.144503	0	0.0846994	0.0365354	0	0	0.0458886	0.0190378	0.0706995	0.0826173	0.25974	0	0	0.0108333	0	0	0	0.00881829	0.0530535	0.0590945	0.0970026	0	0.128326	0	0.0752173	0.0324452	0	0	0.0407514	0.0169065	0.0627848	0.0733684	0.230662	0	0	0.0096205	0	0
TCGA-97-7941	0.0507629	0.208812	0.105182	0.0587158	0.0886377	0.38259	0	0.0816694	0	0.0883577	0	0.084554	0	0.0617619	0.0610485	0	0	0.0381846	0.0250376	0.0427621	0.0386536	0.36816	0.0176233	0	0.0921879	0	0	0	0	0.057911	0	0.0626537	0	0.0599565	0	0.0437948	0.0432889	0	0	0.0270764	0.0177539	0.0303222	0.0274089	0.261059	0.0124965	0	0.0653696	0	0
TCGA-62-8397	0.122057	0.0292393	0.0807823	0	0	0.5913	0	0.022654	0.072701	0.0360597	0	0.146782	0	0.00644382	0.00504482	0	0	0.0287669	0.147047	0.0469502	0	0.244678	0.0857654	0.00318461	0.153922	0	0	0	0	0.0062196	0.0199599	0.0099001	0	0.0402986	0	0.00176914	0.00138504	0	0	0.00789791	0.0403715	0.0128901	0	0.0671758	0.0235467	0.000874327	0.0422591	0	0
TCGA-91-6830	0.029309	0.116009	0.313616	0.173778	0.159825	0.549174	0.0118183	0	0.0304621	0.107891	0	0.134691	0	0.0348227	5.03e-05	0	0	0.0467196	0.0412464	0.111356	0.115968	0.204596	0	0.035559	0.109833	0	0	0.0149866	0.00965346	0	0.0248821	0.0881278	0	0.110018	0	0.0284439	4.11e-05	0	0	0.0381616	0.0336909	0.0909575	0.0947253	0.167118	0	0.0290453	0.0897139	0	0
TCGA-44-3398	0	0.135941	0.559985	0.236973	0.187138	0.728204	0.00251798	0	0	0.0755869	0	0.153572	0	0.00133174	0	0	0.0848511	0.0522171	0.129997	0.118432	0.0388558	0.153417	0	0.0420474	0.127579	0	0	0.019595	0.00252805	0	0	0.0758891	0	0.154186	0	0.00133706	0	0	0.0851904	0.0524259	0.130517	0.118906	0.0390112	0.154031	0	0.0422155	0.128089	0	0
TCGA-55-7913	0.0401799	0.0612002	0	0.0645883	0	0.228825	0	0.00200856	0.0930417	0.0807341	0	0.0426967	0	0.0914298	0.0756015	0	0	0.0217404	0	0.337187	0.037955	0.136629	0.0201095	0	0	0.0427281	0	0.0181384	0	0.00071705	0.0332155	0.0288218	0	0.0152426	0	0.0326401	0.0269895	0	0	0.00776125	0	0.120375	0.0135498	0.0487761	0.00717903	0	0	0.0152538	0
TCGA-55-1592	0.0324286	0.081563	0.130088	0.110635	0.27392	0.379925	0.027455	0	0.0826551	0.0384523	0	0.0856131	0	0.0456349	0	0	0	0.0160542	0.076305	0.165917	0.0473655	0.321753	0.0373644	0	0.0200944	0.0272755	0	0.00806091	0.0183194	0	0.0551516	0.0256573	0	0.0571254	0	0.0304499	0	0	0	0.0107122	0.0509145	0.110708	0.0316046	0.21469	0.0249314	0	0.013408	0.0181996	0
TCGA-91-A4BD	0.00923999	0.0671413	0.00702105	0.0540212	0	0.234044	0	0.0170787	0.0730812	0.0310552	0	0.066447	0	0.0413318	0.0138245	0	0	0.0304274	0.219835	0.00405104	0.00840752	0.367779	0.0123588	0.0143827	0.0999409	0	0	0	0	0.00659966	0.0282406	0.0120006	0	0.0256769	0	0.0159717	0.00534216	0	0	0.011758	0.0849501	0.00156543	0.00324889	0.14212	0.00477577	0.00555785	0.0386199	0	0
TCGA-78-7149	0.0292081	0.0224812	0.0580965	0	0	0.0591505	0	0	0.360695	0.0897789	0	0.131115	0	0.0817534	0.0120427	0	0	0.0685573	0	0	0.078883	0.141716	0	0	0.0228403	0	0	0.0126184	0	0	0.0833817	0.0207541	0	0.0303098	0	0.0188989	0.0027839	0	0	0.0158484	0	0	0.0182353	0.0327605	0	0	0.00527998	0	0
TCGA-78-7535	0.0233354	0.169209	0	0.071107	0.0654274	0.351087	0	0.0419282	0.0124983	0.0376998	0	0.0965286	0	0.014953	0.00374481	0	0.0200441	0.00737898	0.0139248	0.0700929	0.00271796	0.634313	0.02496	0.0022913	0	0.0164863	0	0.00043782	0	0.0122319	0.00364619	0.0109983	0	0.0281606	0	0.0043623	0.00109249	0	0.00584753	0.0021527	0.00406233	0.0204485	0.000792922	0.185051	0.00728167	0.00066845	0	0.0048096	0
TCGA-49-6742	0.0266346	0.0931053	0.207763	0.128604	0.095852	0.577939	0.00439668	0.000751389	0.0542226	0.0587236	0	0.11431	0	0.0224295	0.0146036	0	0	0.052763	0.0454786	0.143308	0.0121618	0.350529	0.0106169	0	0.0930138	0	0	0.0226919	0.00196406	0.000335656	0.024222	0.0262326	0	0.0510638	0	0.0100196	0.00652364	0	0	0.02357	0.0203159	0.0640178	0.00543286	0.156586	0.00474273	0	0.0415506	0	0
TCGA-05-4249	0.168292	0.181747	0.0902583	0.13187	0.0737662	0.598679	0.00750584	0.010959	0.0412859	0.0315568	0	0.0836559	0	0.0367441	0.0229784	0	0	0.0187177	0.0328686	0	0.0211893	0.312202	0.24032	0.00535453	0.116256	0	0	0.0184059	0.00592647	0.00865304	0.0325985	0.0249167	0	0.0660531	0	0.0290124	0.0181433	0	0	0.0147791	0.0259524	0	0.0167306	0.246509	0.189752	0.00422783	0.0917936	0	0
TCGA-64-1679	0.00402315	0.132866	0.0998165	0.169617	0.141214	0.586537	0	0.00955789	0.0962687	0.0138905	0	0.0627547	0	0.00326024	0.0151042	0	0	0.0092245	0	0.273633	0.0373881	0.259309	0.139977	0.0170075	0.013682	0.0394158	0	0.00952667	0	0.00518783	0.0522527	0.00753946	0	0.034062	0	0.00176959	0.00819825	0	0	0.00500687	0	0.148523	0.0202935	0.140748	0.0759765	0.00923133	0.00742634	0.0213941	0
TCGA-69-7760	0.0113772	0.0208648	0.0416438	0.0043051	0	0.0666356	0	0.00700414	0.0645075	0.0429219	0	0.213823	0	0.0508713	0.0335403	0	0	0.0537957	0.0673932	0	0	0.150992	0	0.288937	0	0.0157149	0	0.0104989	0	0.00127992	0.0117879	0.00784342	0	0.0390735	0	0.00929607	0.00612905	0	0	0.00983048	0.0123152	0	0	0.0275919	0	0.0527995	0	0.00287169	0
TCGA-05-4405	0.0696028	0.176611	0.112205	0.114479	0.181161	0.440928	0	0.0447037	0.141341	0.0695896	0	0.0740779	0	0.0294664	0.018748	0	0	0.000964051	0	0.164048	0.0187865	0.352552	0.0120358	0	0.0736869	0	0	0	0	0.0351254	0.111057	0.0546792	0	0.0582059	0	0.0231529	0.014731	0	0	0.000757492	0	0.128899	0.0147613	0.277014	0.009457	0	0.0578987	0	0
TCGA-55-6987	0.232401	0.151098	0.507338	0.227706	0.0410618	0.735099	0.0081187	0.035254	0.125358	0.219195	0	0.0230338	0.0390625	0.104672	0.00935797	0	0.00989932	0.0349953	0.0240536	0.080949	0.134179	0.135532	0.000314529	0	0	0.0129937	0	0.00303129	0.00874049	0.037954	0.134958	0.235983	0	0.0247979	0.0420542	0.112689	0.0100747	0	0.0106575	0.0376755	0.0258958	0.0871487	0.144456	0.145912	0.000338618	0	0	0.0139888	0
TCGA-05-5429	0.00340283	0.0933656	0.053	0.0344217	0	0.220684	0	0.0240862	0.131187	0.0476364	0	0.289382	0	0.0112287	0	0.00272589	0	0.0230564	0.00863664	0	0.0323807	0.348496	0.0262222	0	0	0.0348564	0	0.0201058	0	0.00623132	0.0339391	0.012324	0	0.0748656	0	0.00290497	0	0.000705212	0	0.0059649	0.00223438	0	0.00837718	0.0901592	0.00678392	0	0	0.00901767	0
TCGA-55-A48X	0.379092	0.460508	0.0470172	0.136466	0.0513397	0.49732	0.0418172	0.201195	0.0448699	0.069986	0	0.153604	0	0.0507903	0.0601208	0.00218324	0	0.0480114	0.0041388	0.0349391	0.0430831	0.17945	0.00711437	0	0.0586969	0	0	0	0.0476969	0.229484	0.0511788	0.0798264	0	0.175202	0	0.0579317	0.068574	0.00249022	0	0.0547621	0.00472073	0.0398517	0.0491408	0.204682	0.00811469	0	0.06695	0	0
TCGA-86-8673	0.0257151	0.107417	0	0.0863331	0	0.184945	0	0.0243701	0.116496	0.173088	0	0.0300167	0	0.0531546	0.0511069	0	0	0.0731807	0	0.205484	0.0346668	0.213009	0	0.00952907	0	0.0112694	0	0.0046297	0	0.0102952	0.0492141	0.0731217	0	0.0126807	0	0.0224554	0.0215903	0	0	0.0309155	0	0.0868074	0.0146451	0.0899863	0	0.00402559	0	0.0047608	0
TCGA-86-8674	0.0122593	0	0	0.0183946	0	0.0357308	0.0510286	0	0.10443	0.0508335	0	0.0298529	0	0.200331	0.00176672	0	0.00192753	0.0170606	0	0.362013	0.0242111	0.0884564	0	0.0548708	0	0.013218	0	0	0.00869165	0	0.0177875	0.00865841	0	0.00508482	0	0.0341222	0.000300924	0	0.000328314	0.00290591	0	0.0616612	0.00412385	0.0150667	0	0.00934609	0	0.00225142	0
TCGA-49-6744	0.103193	0.0800205	0.534688	0.196062	0.324196	0.620109	0	0	0.00152091	0.0860669	0	0.183187	0	0	0	0	0.0229938	0.00553054	0.0196639	0.18687	0.00764047	0.269759	0.00139517	0.0159313	0.199442	0	0	0	0	0	0.00110169	0.0623438	0	0.132694	0	0	0	0	0.0166559	0.00400613	0.0142438	0.135362	0.00553448	0.195404	0.00101061	0.0115401	0.144469	0	0
TCGA-44-5643	0.0459436	0.118609	0.173612	0.0923825	0	0.313787	0.0584589	0	0.0325303	0.13591	0	0.107254	0.0638919	0.0903753	0.0161097	0	0.00958237	0.0242419	0.0300026	0.0565153	0.0804997	0.24608	0.029486	0.0121261	0.00693627	0	0	0	0.032184	0	0.0179093	0.074824	0	0.0590477	0.0351752	0.0497554	0.00886905	0	0.00527549	0.0133462	0.0165177	0.031114	0.0443184	0.135477	0.0162333	0.00667592	0.0038187	0	0
TCGA-05-4382	0.143102	0.115175	0.128116	0.198096	0.200727	0.868294	0	0.00800379	0.113803	0.0303064	0	0.0612562	0.00272131	0.0315394	0.0220968	0	0	0.0167997	0	0.14374	0.0492497	0.457239	0	0	0	0.0351799	0	0.028065	0	0.00702909	0.0999439	0.0266157	0	0.0537965	0.00238991	0.0276986	0.0194059	0	0	0.0147539	0	0.126235	0.0432521	0.401557	0	0	0	0.0308957	0
TCGA-49-AARQ	0.0410723	0.0531025	0.0323083	0.0650862	0	0.112193	0.0179586	0	0	0.194083	0	0.01374	0	0.158685	0.0591497	0	0.00471969	0.0388201	0.0189641	0.0918219	0.200683	0.177961	0	0	0.0234138	0	0	0	0.00665933	0	0	0.0719689	0	0.005095	0	0.0588429	0.0219336	0	0.00175013	0.0143951	0.00703219	0.034049	0.0744163	0.0659907	0	0	0.0086822	0	0
TCGA-55-8094	0	0	0	0	0	0.00208737	0.0317866	0	0.0776461	0.057755	0	0	0	0.185469	0	0	0	0.0388254	0	0.0619891	0	0.219811	0	0.284946	0.0389356	0	0	0.00283648	0.00421659	0	0.0103	0.0076614	0	0	0	0.0246031	0	0	0	0.00515032	0	0.00822306	0	0.0291586	0	0.0377991	0.00516493	0	0
TCGA-MP-A4TC	0.00841857	0.182541	0.0389988	0.171697	0.0399646	0.456652	0.00857064	0	0.0264007	0.072488	0	0.0472022	0.00386206	0.032415	0.0326959	0.0127832	0	0.0149664	0	0.222017	0.0743522	0.314853	0.00464757	0	0	0.12337	0	0.00937519	0.00570157	0	0.0175629	0.0482222	0	0.031401	0.00256921	0.0215639	0.0217507	0.00850396	0	0.00995634	0	0.147696	0.0494624	0.209455	0.00309177	0	0	0.0820716	0
TCGA-49-AAR0	0.17029	0.191853	0.0178762	0.0405054	0.0208325	0.46501	0.051626	0	0.0664845	0.0798628	0	0.0389188	0	0.186586	0.0413853	0.00966664	0	0.049899	0.0064848	0.0666717	0.0602674	0.318509	0.00311722	0	0.0201468	0	0	0.000374338	0.0332063	0	0.0427634	0.0513684	0	0.0250329	0	0.120014	0.0266194	0.00621767	0	0.0320955	0.00417108	0.0428839	0.0387645	0.204868	0.00200502	0	0.0129586	0	0
TCGA-05-4427	0.0476444	0.086669	0.177281	0.136449	0.0919052	0.482343	0.0202464	0	0.041532	0.118801	0	0.100493	0.00424578	0.0443728	0	0	0	0.0337025	0.0705464	0.0276609	0.0687504	0.426943	0.0155377	0.00858132	0	0.0163134	0	0.0022729	0.0131411	0	0.0269567	0.0771087	0	0.065226	0.00275576	0.0288005	0	0	0	0.0218749	0.0457887	0.0179535	0.044623	0.277111	0.0100849	0.00556977	0	0.0105884	0
TCGA-75-6214	0	0.0581848	0.123424	0.0976831	0.0186679	0.308145	0	0	0.0820526	0.0849076	0	0.0772987	0	0.0661485	0.0349807	0	0.00621472	0.00656591	0	0.21875	0.0386548	0.32698	0.00726997	0.00538215	0	0.0242204	0	0.0205741	0	0	0.0263374	0.0272538	0	0.0248115	0	0.0212325	0.0112282	0	0.00199481	0.00210754	0	0.0702148	0.0124075	0.104955	0.00233353	0.00172757	0	0.0077743	0
TCGA-69-7763	0.0453465	0.130246	0.0818743	0.0870708	0.0166944	0.291445	0	0.0298401	0.129708	0.0620737	0	0.176159	0	0.0664367	0.0192842	0	0.00451228	0.0178017	0.00751087	0.0685344	0.0116576	0.310859	0	0.0459793	0.0324117	0	0	0.01723	0	0.0139182	0.0604991	0.0289527	0	0.0821649	0	0.0309877	0.0089946	0	0.00210463	0.00830316	0.00350325	0.0319661	0.0054374	0.144992	0	0.0214458	0.0151176	0	0
TCGA-86-8076	0.267634	0.198474	0.140534	0.143697	0	0.519354	0.00470048	0.0280391	0.113676	0.189423	0	0.124997	0	0.0834321	0.0737021	0	0	0.0464864	0.00993404	0.0992128	0.0431717	0.148789	0.0124622	0	0.0138507	0	0	0.00812376	0.00419809	0.0250422	0.101526	0.169177	0	0.111637	0	0.0745149	0.0658248	0	0	0.041518	0.00887229	0.0886089	0.0385575	0.132886	0.0111303	0	0.0123704	0	0
TCGA-62-A46V	0.0190215	0.0834725	0	0.0248412	0.0172444	0.371077	0.0378598	0	0.0919115	0.0015578	0	0.114421	0	0.00604719	0	0	0	0.0297743	0.0518	0.0178808	0	0.376569	0.0874254	0.0924049	0.0923484	0	0	0	0.0144733	0	0.0351366	0.000595528	0	0.0437418	0	0.00231176	0	0	0	0.0113823	0.0198025	0.00683559	0	0.143958	0.0334217	0.0353252	0.0353037	0	0
TCGA-55-A48Y	0.0290212	0.0728034	0.0422929	0.032592	0	0.297387	0.0050435	0.00308717	0.187811	0.0578233	0	0.163302	0.00179962	0.0308795	0.0294909	0	0	0.0296317	0	0.220342	0.0672483	0.177036	0	0	0.000373659	0.0131518	0	0.0129807	0.00216066	0.00132256	0.0804593	0.0247719	0	0.0699594	0.000770967	0.0132289	0.0126341	0	0	0.0126944	0	0.0943957	0.0288096	0.0758431	0	0	0.000160078	0.00563431	0
TCGA-71-6725	0.0411625	0.0674321	0.131481	0.0425594	0	0.331504	0	0.00390746	0.0157181	0.0230217	0	0.100483	0	0.0104983	0.00636908	0	0	0.0599619	0.0403109	0	0.00161446	0.601108	0.0169818	0.0366895	0.0645017	0	0	0.0188333	0	0.000834258	0.00335588	0.00491521	0	0.0214536	0	0.00224142	0.00135982	0	0	0.0128021	0.00860653	0	0.000344694	0.128339	0.00362569	0.00783334	0.0137714	0	0
TCGA-55-6642	0.310007	0.0734111	0.223589	0.118532	0.0196256	0.386622	0	0.00852002	0.354316	0.109765	0	0.107377	0.0240615	0.0134184	0.00398174	0	0.00423847	0.000787513	0	0.0829139	0.0362842	0.231566	0	0	0.0123869	0.00551996	0	0.00486395	0	0.00561531	0.23352	0.0723431	0	0.070769	0.0158583	0.00884369	0.00262425	0	0.00279346	0.000519028	0	0.0546463	0.0239139	0.152619	0	0	0.00816383	0.00363805	0
TCGA-78-7220	0	0.0614275	0.093318	0.0478687	0.038182	0.219058	0.0194337	0	0.0626526	0.161603	0	0.121528	0	0.129084	0	0	0	0.0803	0.00795316	0.0502211	0.0589079	0.267073	0	0	0.0359705	0	0	0.00527331	0.00670879	0	0.0216286	0.0557876	0	0.0419531	0	0.0445618	0	0	0	0.0277207	0.00274555	0.017337	0.0203358	0.0921973	0	0	0.0124175	0	0
TCGA-L9-A8F4	0.148236	0.247375	0.211475	0.104609	0	0.553754	0.00480009	0.0411047	0.114723	0.148758	0	0.0698523	0.0166006	0.07015	0.0688591	0	0	0.0623952	0	0.107952	0.0835047	0.19619	0.00994909	0	0.00516252	0	0	0	0.00446958	0.0382744	0.106823	0.138515	0	0.0650426	0.0154575	0.0653198	0.0641177	0	0	0.0580989	0	0.100519	0.0777549	0.182681	0.00926404	0	0.00480705	0	0
TCGA-35-5375	0.00504655	0	0.0526273	0.0388628	0	0.0789497	0.0104205	0.0309182	0.0632216	0.14137	0	0.0434047	0.00334101	0.10697	0	0.127024	0	0.037986	0	0.0206408	0.14722	0.187455	0.0268291	0	0.0240512	0.0285411	0	0.000607534	0.00272993	0.00809984	0.0165625	0.0370354	0	0.011371	0.000875263	0.0280235	0	0.0332773	0	0.00995141	0	0.00540739	0.0385681	0.0491087	0.00702859	0	0.00630085	0.00747709	0
TCGA-50-5939	0.101004	0.148358	0.290133	0.282422	0.248706	0.741601	0.0019644	0.00338704	0.00185301	0.0545323	0	0.212298	0	0.0117597	0	0	0	0	0.194353	0.0754002	0.00936938	0.29966	0	0.0115015	0	0.0821492	0.00434961	0.0374232	0.00140945	0.00243018	0.00132953	0.0391267	0	0.152322	0	0.00843751	0	0	0	0	0.139447	0.0540993	0.00672248	0.215005	0	0.00825226	0	0.0589417	0.00312082
TCGA-55-8510	0.0713082	0.246443	0.122989	0.127348	0.123179	0.634741	0.000836485	0.0171013	0	0.12061	0	0.0824128	0	0.0724685	0.0536928	0	0	0.0493069	0.033043	0.0769576	0.0978908	0.303539	0.0217145	0	0.0654613	0	0	0.00496456	0.000724443	0.0148107	0	0.104455	0	0.0713741	0	0.0627617	0.046501	0	0	0.0427026	0.028617	0.0666495	0.0847789	0.262882	0.018806	0	0.0566931	0	0
TCGA-38-6178	0.120135	0.161735	0.115029	0.0950922	0.0556801	0.464704	0.013158	0.007276	0.190407	0.0360036	0	0.17411	0.00207503	0.00184616	0	0	0.0186258	0	0.00716841	0.00316775	0.0510266	0.354342	0	0.0532059	0.0875877	0	0	0	0.00880375	0.00486821	0.127397	0.0240892	0	0.116493	0.00138835	0.00123523	0	0	0.0124621	0	0.00479622	0.00211947	0.0341408	0.237083	0	0.0355989	0.058603	0	0
TCGA-MN-A4N4	0.00588027	0.147316	0	0.105717	0.0257075	0.365116	0.0078081	0.00878609	0.023539	0.0439584	0	0.0520982	0.00767332	0.0510445	0.00684358	0.00375598	0.0155996	0	0	0.491173	0.0211738	0.207276	0	0	0.0523058	0.00178565	0	0.00517926	0.00402799	0.00453252	0.0121432	0.022677	0	0.0268761	0.00395847	0.0263325	0.00353042	0.00193761	0.00804741	0	0	0.253383	0.010923	0.106928	0	0	0.0269832	0.000921173	0
TCGA-44-7662	0	0.122681	0.17014	0.170823	0.087691	0.419186	0.000254729	0	0.106332	0.110552	0	0.0955733	0	0.0427379	0.0177729	0	0	0.0387389	0.00820448	0.121451	0.082796	0.318324	0	0	0	0.046496	0	0.0107667	0.000184645	0	0.0770767	0.0801355	0	0.069278	0	0.0309793	0.012883	0	0	0.0280806	0.00594716	0.0880358	0.0600161	0.230743	0	0	0	0.0337035	0
TCGA-MP-A4T4	0.176996	0.253767	0.263179	0.164248	0.0576676	0.768083	0.00024368	0	0.0808272	0.185643	0	0.0894838	0.0539418	0.0743726	0.0106152	0	0	0.0470458	0.00779259	0.0447088	0.117592	0.254866	0.00143428	0	0.0310993	0	0	0.00033332	0.000250275	0	0.0830146	0.190667	0	0.0919054	0.0554016	0.0763853	0.0109024	0	0	0.0483189	0.00800347	0.0459187	0.120775	0.261763	0.0014731	0	0.031941	0	0
TCGA-95-A4VP	0.110445	0.160105	0.0490653	0.0515407	0	0.223815	0.0991013	0.00817811	0.087924	0.156768	0	0.0908749	0	0.13905	0.0400688	0	0	0.0298045	0.023454	0.0522566	0.0541232	0.205583	0	0.0106181	0.00219642	0	0	0	0.0547792	0.00452053	0.0486008	0.0866548	0	0.050232	0	0.0768609	0.0221484	0	0	0.0164747	0.0129644	0.0288853	0.0299171	0.113638	0	0.00586927	0.00121409	0	0
TCGA-55-8206	0.145117	0.331811	0.104379	0.243084	0.129411	0.915515	0	0.0115381	0.0304748	0.0316947	0	0.0884073	0.00104782	0.0193518	0.0197467	0	0	0.0164608	0.353928	0	0	0.18079	0.0899142	0.0104885	0.146158	0	0	0	0	0.0124856	0.0329773	0.0342974	0	0.095667	0.00113387	0.0209409	0.0213683	0	0	0.0178125	0.382991	0	0	0.195636	0.0972977	0.0113498	0.15816	0	0
TCGA-86-8585	0.0921123	0.29786	0.0225271	0.0867343	0.0477331	0.535181	0.00834982	0.0466862	0	0.142069	0	0.0520456	0	0.0861559	0.0595902	0.0072234	0	0.0598845	0.0404565	0.249271	0.0838083	0.160255	0	0	0.00420393	0	0	0	0.00527571	0.029498	0	0.0897645	0	0.0328843	0	0.0544363	0.0376512	0.004564	0	0.0378372	0.0255618	0.157498	0.0529531	0.101255	0	0	0.00265619	0	0
TCGA-95-7562	0.0575381	0.088312	0.0313147	0.0896813	0.013308	0.404754	0.0310486	0	0.0358033	0.077156	0	0.132874	0.00594888	0.0293736	0.0482055	0	0	0.00930191	0.00644851	0.152703	0.14858	0.291021	0	0	0.0255358	0	0	0.00600095	0.0148437	0	0.0171168	0.0368867	0	0.0635241	0.00284404	0.0140429	0.0230461	0	0	0.00444705	0.0030829	0.0730039	0.0710332	0.139131	0	0	0.0122081	0	0
TCGA-05-4426	0.0117237	0.145127	0.0618781	0.0847547	0	0.511636	0.0212019	0	0.000959892	0.0684621	0	0.194842	0	0.00674386	0.0560183	0	0	0.0206644	0.0920915	0.137981	0.0242419	0.307263	0.0323817	0	0.0296011	0.00575043	0	0.00179773	0.00972947	0	0.000440491	0.031417	0	0.0894122	0	0.00309474	0.0257066	0	0	0.00948281	0.0422605	0.0633191	0.0111245	0.141002	0.0148598	0	0.0135838	0.00263885	0
TCGA-55-8508	0.289111	0.0893839	0.00545566	0.0726647	0	0.264413	0	0.052994	0.316873	0.0344679	0	0.0407209	0.0165056	0.030965	0.0375375	0	0.0348804	0	0	0.274062	0.0120643	0.0647309	0	0	0	0.0566306	0	0.0275681	0	0.0284245	0.169962	0.0184876	0	0.0218415	0.00885315	0.0166087	0.0201341	0	0.0187089	0	0	0.146999	0.00647094	0.0347198	0	0	0	0.030375	0
TCGA-99-8025	0.0139031	0.0925395	0.0403163	0.059519	0	0.196898	0	0.0592357	0.102294	0.0340402	0	0.120071	0	0.0469086	0.0234798	0	0	0.0254803	0	0.221949	0.0559662	0.289698	0	0	0.0208768	0	0	0	0	0.0247077	0.0426676	0.0141984	0	0.0500827	0	0.0195659	0.00979361	0	0	0.010628	0	0.0925766	0.0233439	0.120835	0	0	0.00870785	0	0
TCGA-44-7672	0.237236	0.279323	0.111593	0.146405	0.0132242	0.743304	0.00696989	0.0360797	0.0944203	0.0652115	0	0.160961	0	0.0433998	0.0621008	0	0	0.0661028	0.0376653	0.0244057	0.039893	0.230872	0.0489109	0.0278852	0.0408971	0	0	0.0142252	0.00708127	0.0366563	0.0959293	0.0662536	0	0.163533	0	0.0440934	0.0630932	0	0	0.0671592	0.0382672	0.0247957	0.0405305	0.234562	0.0496925	0.0283309	0.0415506	0	0
TCGA-NJ-A4YG	0.058331	0.154845	0.0243024	0.0498186	0	0.452017	0	0.0204581	0.0343308	0.0616088	0	0.114437	0	0.0929377	0.0379696	0	0	0.0382696	0.023998	0.0498097	0.0438313	0.314958	0.0968075	0.0195835	0.0465976	0	0	0.00440311	0	0.0104833	0.017592	0.03157	0	0.0586406	0	0.0476238	0.0194566	0	0	0.0196104	0.0122972	0.0255238	0.0224604	0.161393	0.0496068	0.0100351	0.0238779	0	0
TCGA-44-8117	0	0.101644	0.138129	0.0237208	0.0126119	0.316661	0.0203136	0	0.0346129	0.0634187	0	0.0970585	0	0.0520232	0.00547884	0.00679661	0	0.0105807	0	0.223941	0.0746079	0.378667	0	0	0.0280657	0.00404238	0	0.000392061	0.00950346	0	0.0161932	0.0296696	0	0.0454075	0	0.0243384	0.0025632	0.0031797	0	0.00495006	0	0.104768	0.0349043	0.177154	0	0	0.0131302	0.00189117	0
TCGA-62-A46O	0.0324091	0.0479827	0.0198532	0.0265161	0	0.0950316	0.110921	0	0.398891	0.0366412	0	0	0	0.0676609	0	0.0162399	0	0.0492849	0	0.0832283	0.0018149	0.0826746	0	0.136431	0.0162121	0	0	0	0.0175062	0	0.0629555	0.00578294	0	0	0	0.0106787	0	0.00256309	0	0.00777845	0	0.0131356	0.00028644	0.0130482	0	0.0215325	0.0025587	0	0
TCGA-93-A4JO	0.136308	0.377831	0.0592045	0.148941	0.107783	0.523889	0.00958998	0.0485871	0.0169385	0.105375	0	0.139927	0	0.0803236	0.0420551	0	0	0.0236923	0.0239214	0.113294	0.0812165	0.280257	0.00783524	0	0.0269871	0	0	0	0.00912252	0.0462187	0.0161128	0.100239	0	0.133107	0	0.0764082	0.0400051	0	0	0.0225375	0.0227554	0.107771	0.0772577	0.266596	0.00745331	0	0.0256716	0	0
TCGA-67-3774	0.116475	0.152922	0.186553	0.0929858	0.0507842	0.436577	0	0.0256408	0.0579018	0.0729217	0	0.280034	0	0.0322701	0.0010516	0	0	0.030703	0.0148759	0.0371797	0.0814581	0.311256	0	0.0043794	0.045332	0	0	0.00499624	0	0.0186629	0.0421442	0.0530765	0	0.203824	0	0.023488	0.000765414	0	0	0.0223474	0.0108275	0.0270615	0.0592898	0.22655	0	0.00318757	0.0329952	0	0
TCGA-86-8358	0.103035	0.0961123	0.13546	0.078681	0.0829353	0.267432	0.0520055	0	0.111202	0.119275	0	0.0241933	0	0.126978	0	0	0	0.0467271	0.00529054	0.137359	0.0785749	0.285407	8.34e-05	0	0	0.012904	0	0	0.0289836	0	0.0619747	0.0664739	0	0.0134833	0	0.0707672	0	0	0	0.0260418	0.00294851	0.0765528	0.0437912	0.159063	4.65e-05	0	0	0.00719163	0
TCGA-62-8394	0.143801	0.137455	0.0112751	0.0622629	0.013372	0.48916	0.0368975	0	0.0602615	0.0405858	0	0.23291	0	0.0420009	0.0257553	0	0.00666342	0.00696034	0.0202952	0.180315	0.0755008	0.203047	0	0.0598651	0.00894252	0	0	0	0.0218177	0	0.0356329	0.0239986	0	0.137721	0	0.0248353	0.0152292	0	0.00394011	0.00411568	0.0120007	0.106621	0.0446439	0.120062	0	0.0353985	0.00528775	0	0
TCGA-MP-A4T6	0.0616187	0.300276	0.0175568	0.0709227	0	0.38025	0.00676374	0.0409201	0.0393547	0.0779217	0	0.139158	0	0.123184	0.0498306	0	0	0.0406229	0.00195057	0.211439	0.057699	0.166094	0.0105067	0.000562859	0.0339923	0	0	0	0.0044707	0.0270474	0.0260126	0.0515047	0	0.0919805	0	0.0814223	0.032937	0	0	0.0268509	0.00128929	0.139757	0.0381379	0.109785	0.00694472	0.000372039	0.0224682	0	0
TCGA-55-8514	0.0898575	0.113172	0	0.0421028	0.00150132	0.294539	0	0.052522	0.0596762	0.0283467	0	0.107187	0	0.0791636	0.00185308	0	0.0218317	0.00694314	0.0530391	0.0431895	0.05775	0.441723	0	0.00816748	0.034409	0	0	0.00419836	0	0.0184339	0.0209448	0.00994896	0	0.0376198	0	0.0277844	0.000650384	0	0.00766236	0.00243686	0.0186153	0.0151584	0.0202687	0.155033	0	0.00286657	0.0120767	0	0
TCGA-64-1681	0.0413799	0.166374	0.0546675	0.0808807	0	0.418484	0.00185387	0.0666977	0.0514498	0.0162309	0	0.168426	0	0.0396852	0.0271466	0	0	0.0207769	0.0354885	0.0278464	0.108252	0.239587	0.10404	0.0153706	0.0764214	0	0	0.000726856	0.00103283	0.0371589	0.0286639	0.00904264	0	0.0938341	0	0.0221096	0.015124	0	0	0.0115753	0.0197715	0.0155139	0.0603099	0.13348	0.0579631	0.00856331	0.0425762	0	0
TCGA-50-5944	0.0349721	0.0813577	0.155761	0.0652205	0.117775	0.348458	0.0362162	0	0.0238492	0.0331304	0	0.126696	0	0.0173463	0.00114291	0	0	0.0257863	0.080551	0.0560187	0.0280529	0.393651	0.00396263	0	0.173597	0	0	0	0.0168168	0	0.0110743	0.015384	0	0.0588305	0	0.00805468	0.000530705	0	0	0.0119738	0.0374035	0.026012	0.0130263	0.18279	0.00184003	0	0.0806092	0	0
TCGA-44-A47B	0.0378536	0.171826	0.0948842	0.0897982	0.0687294	0.423186	0.011447	0	0.0147994	0.0844957	0	0.117876	0.00409038	0.0479356	0.0632399	0	0	0.0848393	0.00770032	0.158235	0.046531	0.284359	0.00420242	0	0.0659422	0	0	0.00430645	0.00701485	0	0.00906926	0.0517799	0	0.0722356	0.00250663	0.0293754	0.0387541	0	0	0.0519904	0.00471884	0.0969683	0.0285147	0.174258	0.00257529	0	0.0404101	0	0
TCGA-L4-A4E6	0.0922454	0.130243	0.221556	0.136145	0.64952	0.883847	0.0100192	0.015874	0	0.0380868	0	0.0746219	0	0.0339534	0.0167563	0	0.0353899	0	0.0198732	0.123743	0.0316848	0.553728	0.00569098	0	0.0268319	0.0114531	0	0.00229316	0.00712334	0.0112859	0	0.0270785	0	0.0530539	0	0.0241398	0.0119132	0	0.0251611	0	0.0141292	0.0879776	0.0225269	0.393683	0.00404611	0	0.0190766	0.00814276	0
TCGA-49-AARR	0.112507	0.212387	0.0847845	0.149552	0.0598296	0.374959	0.055901	0.0268692	0.0863751	0.115923	0	0.0603829	0	0.0909155	0.023608	0	0	0.0609108	0.00913123	0.0255628	0.0142378	0.282033	0	0.0191025	0.112371	0	0	0.0166768	0.0522318	0.0251056	0.0807057	0.108314	0	0.0564196	0	0.0849482	0.0220585	0	0	0.0569129	0.00853189	0.0238849	0.0133033	0.263521	0	0.0178487	0.104995	0	0
TCGA-49-4507	0.0454678	0	0.378103	0.0498718	0	0.389887	0.0161957	0	0.0683803	0.324096	0	0.0295006	0.0173745	0.0628678	0.0479591	0	0	0.148619	0.00235501	0	0.0651151	0.169306	0.0104641	0	0	0.0377672	0	0	0.0055416	0	0.0233973	0.110894	0	0.010094	0.00594494	0.0215111	0.0164099	0	0	0.050852	0.0008058	0	0.0222801	0.0579305	0.00358043	0	0	0.0129226	0
TCGA-75-7027	0.0479732	0.0564175	0.104813	0.0503323	0.0474917	0.329274	0.0791498	0	0.0916654	0.0701648	0	0.118379	0.012369	0.0591217	0.0305614	0	0	0.0288208	0	0.130802	0.0625248	0.292592	0	0	0.0238491	0	0	0	0.0315971	0	0.0365935	0.0280103	0	0.0472577	0.00493778	0.0236018	0.0122003	0	0	0.0115055	0	0.0522171	0.0249603	0.116805	0	0	0.00952073	0	0
TCGA-38-4625	0.037391	0.0715237	0.246271	0.233902	0.25966	0.584411	0	0.00461535	0	0.0636785	0	0.0711951	0	0.0148665	0	0	0.00760516	0.0207526	0.130039	0.245478	0	0.316715	0	0.0294277	0.0777751	0	0	0.0178513	0	0.00249097	0	0.0343682	0	0.0384251	0	0.00802368	0	0	0.00410462	0.0112005	0.070184	0.132488	0	0.170936	0	0.0158826	0.0419764	0	0
TCGA-44-8120	0.0623803	0.0619179	0.285144	0.0923555	0.080152	0.395693	0.0138954	0.0287963	0.0733466	0.0593386	0	0.140228	0	0.025971	0.0398641	0	0	0.0383844	0.0309152	0.0521926	0.0145891	0.329501	0.0535968	0.012226	0.0775355	0	0	0.00961944	0.00900697	0.0186656	0.047543	0.038463	0	0.090895	0	0.0168343	0.0258397	0	0	0.0248806	0.0200391	0.033831	0.00945657	0.213582	0.0347412	0.00792484	0.0502582	0	0
TCGA-44-6776	0	0.0618012	0.407777	0.170868	0.094654	0.475905	0.00859261	0	0	0.0761742	0	0.248008	0	0	0	0	0.0704835	0.0404906	0.0652574	0.11848	0.0109385	0.218278	0	0.105822	0.00461734	0.0296767	0.00318113	0	0.00496812	0	0	0.0440428	0	0.143395	0	0	0	0	0.0407525	0.0234111	0.0377309	0.0685032	0.00632446	0.126205	0	0.0611848	0.00266968	0.0171587	0.00183928
TCGA-62-8402	0.0158861	0.223581	0.0870546	0.199272	0	0.413719	0.0210954	0	0	0.0645544	0	0.119573	0.0236653	0.0344639	0.0149462	0.00816231	0	0.0864156	0	0.176592	0.289411	0.0957317	0.0190184	0	0.0360162	0	0	0.0103552	0.0145932	0	0	0.0446569	0	0.0827172	0.016371	0.0238411	0.0103393	0.00564645	0	0.0597798	0	0.122161	0.200206	0.0662244	0.0131564	0	0.024915	0	0
TCGA-75-5125	0.0623942	0.111445	0.327123	0.200069	0.11478	0.675533	0.0205836	0	0	0.0745976	0	0.106049	0.00735545	0.0670755	0	0	0	0.0680698	0.030359	0	0.123652	0.375574	0.0193411	0.0222078	0.0674834	0	0	0.0176523	0.0182964	0	0	0.0663083	0	0.0942643	0.00653811	0.059622	0	0	0	0.0605058	0.0269855	0	0.109912	0.33384	0.0171919	0.0197401	0.0599846	0	0
TCGA-64-1678	0	0	0	0	0	0	0	0	0.413937	0.112315	0	0.0784157	0.0702068	0.0372463	0.00168609	0	0.0128462	0.0345518	0.00256551	0	0	0.194703	0.00471936	0.0368067	0	0	0	0	0	0	0.0486629	0.0132039	0	0.00921863	0.0082536	0.00437872	0.000198219	0	0.00151022	0.00406195	0.000301605	0	0	0.0228895	0.000554814	0.00432704	0	0	0
TCGA-97-7554	0.123783	0.100016	0.134543	0.117333	0.0699489	0.495208	0.00128756	0.0133308	0.168442	0.0489275	0	0.138574	0	0.0335237	0.0206388	0	0	0.0139943	0.0102867	0.0973646	0.0621481	0.353216	0	0.00161051	0.0322977	0	0	0.00435838	0.000892745	0.00924308	0.116791	0.0339245	0	0.0960818	0	0.0232441	0.0143102	0	0	0.0097031	0.00713241	0.067509	0.0430911	0.244907	0	0.00111667	0.022394	0	0
TCGA-78-7167	0.0157794	0.0304309	0.0987977	0	0	0.114564	0.00307609	0	0.147396	0.111972	0	0.134591	0	0.0846225	0.00825963	0	0	0.0826224	0.087028	0.0186207	0.0496148	0.187309	0	0.00237569	0.0825125	0	0	0	0.000849267	0	0.040694	0.030914	0	0.0371587	0	0.0233632	0.00228038	0	0	0.0228109	0.0240273	0.00514092	0.013698	0.0517135	0	0.000655897	0.0227806	0	0
TCGA-50-6595	0.105186	0.142889	0.694149	0.197579	0.186577	0.745662	0.0125647	0	0	0.100831	0	0.316617	0	0	0	0	0.0940211	0.0133628	0.056828	0.102038	0.057599	0.170291	0	0.0134019	0.0620266	0	0	0.000418546	0.0120152	0	0	0.0964211	0	0.302769	0	0	0	0	0.089909	0.0127783	0.0543426	0.0975753	0.0550799	0.162843	0	0.0128158	0.0593137	0	0
TCGA-64-1677	0.0937177	0.0196477	0.0622496	0.0342335	0	0.0770365	0.0254352	0.0386795	0.137359	0.109249	0	0.13626	0.0155993	0.0915455	0.0309002	0.0380423	0	0.0324104	0	0.0452795	0.166995	0.105118	0	0	0	0.026959	0	0.000169475	0.0106431	0.016185	0.0574764	0.045714	0	0.0570164	0.00652737	0.0383063	0.0129299	0.0159184	0	0.0135618	0	0.0189467	0.0698771	0.0439856	0	0	0	0.0112807	0
TCGA-97-A4M6	0.270961	0.390526	0.0607006	0.182132	0.0488803	0.686711	0.012769	0.0468227	0	0.0587746	0	0.208886	0	0.0842566	0.0567862	0	0	0.0323405	0.0286289	0.0715517	0.10493	0.218242	0.0209413	0	0.0525686	0	0	0.0025025	0.0128585	0.0471509	0	0.0591866	0	0.21035	0	0.0848472	0.0571842	0	0	0.0325672	0.0288296	0.0720532	0.105665	0.219772	0.021088	0	0.052937	0	0
TCGA-97-8547	0.00405653	0.147303	0	0.068815	0	0.616046	0.00521638	0	0	0.019178	0	0.0236404	0	0.0514809	0.0773398	0	0	0	0.00299343	0.41989	0	0.318734	0	0.0518591	0.0219129	0.00775531	0	0	0.00261545	0	0	0.0096157	0	0.0118531	0	0.0258121	0.0387775	0	0	0	0.00150088	0.210529	0	0.15981	0	0.0260017	0.010987	0.00388845	0
TCGA-62-A470	0.0638565	0.0522666	0.00235691	0.0254577	0.0705225	0.175797	0.00220407	0.00224969	0.041608	0.0666377	0	0	0	0.0274847	0.00996329	0	0.0685147	0	0.02648	0.0342654	0	0.662007	0.00209894	0.0161456	0	0.0367356	0	0.0036057	0.000708969	0.000723642	0.0133838	0.0214349	0	0	0	0.0088408	0.00320482	0	0.0220387	0	0.00851764	0.0110219	0	0.212943	0.000675152	0.00519343	0	0.0118165	0
TCGA-62-8395	0.0950553	0.117426	0.100856	0.0651256	0.0373613	0.36601	0.0188323	0.00429197	0.102053	0.0631958	0	0.135542	0	0.0693408	0.0282414	0	0	0.0646001	0.0315243	0	0.0258128	0.372688	0.0573945	0	0.00791701	0.0167578	0	0.00180825	0.0113737	0.00259211	0.0616342	0.0381668	0	0.08186	0	0.041878	0.0170563	0	0	0.0390149	0.0190389	0	0.0155895	0.225083	0.0346631	0	0.00478144	0.0101208	0
TCGA-55-7727	0.208815	0.074126	0.292601	0.116944	0.0915133	0.362376	0.0498391	0.071437	0.0664737	0.0369369	0	0.159672	0.0373283	0.00392495	0	0.0697304	0	0	0	0	0.0948232	0.364525	0.0103522	0	0.0339247	0	0	0.00103273	0.032169	0.0461096	0.042906	0.0238412	0	0.103062	0.0240938	0.00253339	0	0.0450081	0	0	0	0	0.0612044	0.235285	0.00668194	0	0.021897	0	0
TCGA-73-4675	0.0193779	0.0889942	0.0248794	0.0291342	0	0.343992	0.00614685	0.0274643	0.000775647	0.0303036	0	0.0567958	0	0.0150137	0.0326183	0	0	0.0200485	0.0501995	0.266781	0	0.302072	0.0732077	0.0359099	0.0817802	0	0	0.000883224	0.00256064	0.011441	0.000323116	0.0126238	0	0.0236598	0	0.00625438	0.013588	0	0	0.00835176	0.020912	0.111135	0	0.125836	0.0304966	0.0149592	0.0340678	0	0
TCGA-38-4628	0.0334534	0.015876	0.0737292	0.0504004	0.0531547	0.310578	0.00166607	0.00401876	0	0.0259488	0	0.0607841	0	0.0254837	0.0596776	0	0	0	0.0578286	0.0871358	0	0.568209	0.0435943	0.00166181	0.0412067	0.0162123	0	0.00657215	0.000537779	0.00129718	0	0.00837582	0	0.01962	0	0.00822569	0.0192629	0	0	0	0.0186661	0.0281259	0	0.183408	0.0140715	0.000536403	0.0133008	0.00523303	0
TCGA-O1-A52J	0.136801	0.119786	0.122492	0.104595	0.143053	0.70989	0.00581829	0	0.0149292	0.0421838	0	0.0702001	0	0.0423842	0.0335039	0	0.00533461	0.0299386	0.288792	0	0.000624109	0.348657	0.0102756	0.0433157	0.0640425	0	0	0	0.00373641	0	0.00958729	0.0270897	0	0.0450813	0	0.0272184	0.0215157	0	0.0034258	0.0192261	0.185458	0	0.000400792	0.223902	0.00659883	0.0278166	0.041127	0	0
TCGA-05-4396	0.0614857	0.0622144	0.0349191	0.0497315	0	0.149381	0.0579785	0	0.0821926	0.0667756	0	0.183357	0	0.0855894	0.0207531	0	0	0.0258709	0.018302	0.0403078	0.0683538	0.304374	0.00292796	0	0.0286978	0	0	0.0145189	0.0222423	0	0.0315316	0.0256171	0	0.0703415	0	0.0328347	0.00796151	0	0	0.00992488	0.0070212	0.0154633	0.0262226	0.116767	0.00112326	0	0.0110093	0	0
TCGA-44-7660	0.126197	0.0416239	0.0371423	0.0605735	0.0236366	0.276383	0.023284	0	0.065109	0.0959367	0	0.0799503	0	0.139663	0.018621	0	0	0.0618513	0	0.024896	0.11686	0.370098	0	0	8.03e-06	0	0	0.0037225	0.00932745	0	0.0260823	0.0384317	0	0.0320277	0	0.0559484	0.00745947	0	0	0.0247773	0	0.00997318	0.0468135	0.148259	0	0	3.22e-06	0	0
TCGA-86-8279	0.117905	0.0827715	0	0.0630637	0	0.329485	0	0.0149951	0.0613828	0.0302781	0	0.0232836	0	0.0425373	0.0159405	0	0	0.0295437	0.0375548	0.251798	0.0307583	0.254991	0.159673	0.00481266	0	0.0424519	0	0	0	0.00566983	0.0232096	0.0114485	0	0.00880382	0	0.0160839	0.0060273	0	0	0.0111709	0.0142	0.0952081	0.0116301	0.0964154	0.0603744	0.00181973	0	0.0160516	0
TCGA-97-7937	0.0220394	0.0618607	0.138341	0.0442021	0.00547596	0.274107	0.0151566	0	0.187506	0.0235761	0	0.00469931	0	0.0667607	0	0.0155447	0	0.0205677	0	0.152528	0.0474361	0.338489	0.0253383	0	0.0877191	0.0103657	0	0.00431305	0.0036366	0	0.0449894	0.00565676	0	0.00112753	0	0.0160183	0	0.00372974	0	0.00493492	0	0.0365969	0.0113816	0.0812155	0.00607955	0	0.0210469	0.00248711	0
TCGA-05-5420	0.0436147	0	0.281089	0.241649	0	0.73059	0.0177745	0	0.0636605	0.0731921	0	0.117992	0.0142063	0.0436213	0	0.00831013	0	0.063046	0.0167227	0.0521028	0.150584	0.271541	0.0872424	0	0	0.00856243	0	0.0114413	0.0138364	0	0.0495558	0.0569756	0	0.0918497	0.0110587	0.0339565	0	0.00646892	0	0.0490774	0.0130176	0.0405588	0.117221	0.211378	0.0679128	0	0	0.00666532	0
TCGA-78-7542	0	0.130448	0	0.139833	0	0.311569	0.0315106	0	0.0199428	0.0312235	0	0	0.0389166	0.143804	0	0.012093	0.0156525	0.0396988	0.00493315	0.0454673	0.16412	0.306016	0.0399863	0.072222	0.0344136	0	0	0	0.0114527	0	0.00724837	0.0113484	0	0	0.0141445	0.0522665	0	0.00439527	0.00568901	0.0144288	0.00179299	0.0165254	0.0596504	0.111224	0.0145333	0.0262496	0.0125079	0	0
TCGA-67-3771	0.0998471	0.0942666	0.209232	0.116131	0.102263	0.522605	0.00983318	0	0.116436	0.0946777	0	0.132509	0.018702	0.0359972	0.00700517	0	0	0.0110867	0.0329625	0.0802121	0.105732	0.337817	0	0	0.0151103	0	0	0.00191996	0.00722535	0	0.0855561	0.0695685	0	0.0973668	0.0137421	0.0264505	0.00514735	0	0	0.00814643	0.0242206	0.0589393	0.0776911	0.248225	0	0	0.0111029	0	0
TCGA-38-7271	0.706603	0.581537	0.440102	0.214103	0.140287	0.799205	0	0.236423	0.0529567	0.138918	0	0.149892	0	0.000200424	0.050187	0.0283527	0	0.0247321	0.0131513	0.0655684	0.0312175	0.179307	0	0.00967136	0.0194225	0	0	0	0	0.293179	0.0656695	0.172267	0	0.185875	0	0.000248539	0.0622349	0.0351591	0	0.0306693	0.0163084	0.0813089	0.0387117	0.222352	0	0.0119931	0.0240851	0	0
TCGA-78-7163	0.125727	0.0250764	0.0493647	0.0317146	0	0.253652	0.00167204	0.0184893	0.00536487	0.269542	0	0.15163	0	0.0718182	0.0620323	0	0	0.0485984	0.0149965	0.0289821	0.026201	0.149746	0.00405368	0.0158113	0.131062	0	0	0	0.000287827	0.00318277	0.000923515	0.0463992	0	0.0261018	0	0.0123629	0.0106783	0	0	0.00836579	0.00258151	0.00498902	0.00451026	0.0257774	0.000697805	0.00272178	0.0225612	0	0
TCGA-73-4658	0.0806626	0.102899	0.282118	0.186951	0.171239	0.694259	0	0.00529687	0.0525415	0.0574567	0	0.12741	0.0183307	0.0439181	0.00755775	0.00846971	0	0.018413	0.0556313	0	0.0578889	0.381816	0.0864487	0.00618714	0	0.0660233	0	0.00660977	0	0.0046766	0.0463888	0.0507284	0	0.11249	0.0161841	0.0387752	0.00667272	0.00747789	0	0.0162568	0.0491167	0	0.05111	0.337105	0.0763253	0.00546261	0	0.0582918	0
TCGA-97-8171	0.0767538	0.00741656	0	0	0	0.0516518	0	0.0458742	0.0571199	0.0155193	0	0.0452272	0	0.0647252	0	0	0	0.0296499	0.0144712	0.179587	0.0139459	0.485578	0	0.0108381	0.037464	0	0	0	0	0.00622666	0.00775308	0.00210649	0	0.00613885	0	0.00878537	0	0	0	0.00402448	0.00196422	0.024376	0.00189293	0.0659091	0	0.00147109	0.00508512	0	0
TCGA-44-6148	0.0316444	0.181811	0.349082	0.186636	0.175506	0.575861	0.0034118	0	0.0267903	0.0321957	0	0.244363	0	0	0	0	0.0357515	0.0348821	0.0935704	0.0629958	0.0153601	0.230297	0	0.047713	0.132832	0	0	0.0398376	0.0031253	0	0.0245407	0.0294921	0	0.223843	0	0	0	0	0.0327493	0.0319529	0.085713	0.0577059	0.0140703	0.210958	0	0.0437064	0.121677	0	0
TCGA-MP-A4T7	0.0352561	0.128086	0	0.0556983	0	0.308169	0.00821971	0.0116792	0.0390583	0.0640725	0	0.10992	0	0.110755	0.00950458	0	0	0.0569172	0.0192469	0.0858818	0.0156689	0.352333	0	0.101619	0	0.00739761	0	0.00772583	0.00440422	0.00625785	0.0209279	0.0343308	0	0.0588962	0	0.0593439	0.00509266	0	0	0.0304969	0.0103127	0.0460165	0.00839559	0.188784	0	0.0544489	0	0.00396372	0
TCGA-49-4514	0.0874005	0.117386	0.00861604	0.0164931	0	0.123747	0.0736725	0	0.0549071	0.181005	0	0.0650377	0.0198086	0.148621	0.0247505	0	0	0.103329	0.0324184	0.0139592	0.0724041	0.172638	0.000427273	0.012241	0.00371301	0.0161956	0	0.00487142	0.0227199	0	0.0169328	0.0558202	0	0.020057	0.00610877	0.0458333	0.00763283	0	0	0.0318659	0.00999753	0.00430489	0.0223287	0.0532401	0.000131767	0.00377502	0.00114506	0.00499456	0
TCGA-55-8621	0.117865	0.24169	0.249494	0.200516	0.188572	0.749644	0	0.01055	0.107783	0.0545817	0	0.134481	0	0.0321303	1.1e-05	0	0.0330981	0.0143903	0.0399192	0.146482	0.0869218	0.258497	0	0	0.0775161	0	0	0.00363758	0	0.0109961	0.112341	0.0568897	0	0.140168	0	0.0334889	1.15e-05	0	0.0344977	0.0149988	0.0416072	0.152676	0.0905973	0.269428	0	0	0.0807939	0	0
TCGA-55-8614	0.00929009	0.143193	0.0803491	0.167281	0.0423065	0.290494	0	0.0132569	0.11067	0.0837252	0	0.106012	0	0.0510981	0.0186725	0	0	0.0538408	0.00983768	0.138354	0.0964153	0.229854	0.00913185	0	0.0705187	0	0	0.00861216	0	0.00801356	0.0668978	0.0506102	0	0.0640823	0	0.0308878	0.0112872	0	0	0.0325457	0.00594669	0.0836325	0.0582811	0.138942	0.00552003	0	0.0426272	0	0
TCGA-71-8520	0.0222242	0.131017	0.129809	0.0944227	0.105842	0.46273	0	0.00874063	0.0444723	0.00744039	0	0.112805	0	0.0472343	0.0278888	0	0.0233022	0.0166648	0.0134184	0.243315	0.0342768	0.28493	0	0.0787411	0.0536617	0	0	0.00310831	0	0.00472268	0.024029	0.00402015	0	0.0609504	0	0.0255214	0.0150687	0	0.0125905	0.00900423	0.00725015	0.131467	0.0185202	0.153952	0	0.0425449	0.0289942	0	0
TCGA-69-7978	0.243177	0.281445	0.417334	0.25084	0.16466	1.19761	0	0.0142788	0.0440295	0.118676	0	0.154074	0	0.032503	0.0486614	0	0	0.0527111	0.0112042	0.0308726	0.0854717	0.298397	0.0835282	0	0.0113709	0.000837056	0	0.0133843	0	0.0180005	0.0555055	0.149609	0	0.194232	0	0.0409747	0.0613447	0	0	0.0664499	0.0141244	0.0389193	0.107749	0.376173	0.105299	0	0.0143346	0.00105523	0
TCGA-L9-A443	0	0.131722	0.0798656	0.0529389	0.0418641	0.210113	0.0107951	0.0127648	0.0499856	0.123498	0	0.152799	0	0.0821783	0.000508791	0.0341952	0	0.0408112	0.00022547	0.0424641	0.0993414	0.285719	0.00953679	0	0.0551764	0	0	0	0.00549949	0.00650289	0.0254647	0.062915	0	0.0778423	0	0.041865	0.000259199	0.0174204	0	0.0207909	0.000114864	0.021633	0.0506086	0.145557	0.00485843	0	0.0281091	0	0
TCGA-55-7573	0.38261	0.241009	0.175367	0.120819	0.0129851	0.718663	0.0062244	0.103194	0.0188218	0.0662518	0	0.246082	0	0.0502376	0.0206063	0	0	0.0320699	0.0233871	0	0.0478096	0.17628	0.136197	0.00986074	0.0599062	0	0	0.00307062	0.00591694	0.0980965	0.0178921	0.0629792	0	0.233927	0	0.0477561	0.0195884	0	0	0.0304858	0.0222319	0	0.045448	0.167573	0.12947	0.00937366	0.0569471	0	0
TCGA-78-7154	0.000883853	0.0206919	0.173296	0.0436029	0	0.237193	0.095401	0	0.0398262	0.0808366	0	0.250179	0	0.0568098	0	0	0	0.0371898	0.0188423	0.0115341	0.111635	0.274606	0.00463894	0.000290129	0.0177598	0	0	0.000451061	0.0344831	0	0.0143953	0.0292187	0	0.0904281	0	0.0205341	0	0	0	0.0134424	0.00681062	0.00416904	0.040351	0.0992576	0.00167676	0.000104868	0.00641936	0	0
TCGA-S2-AA1A	0.374099	0.428903	0.0742289	0.09847	0	0.625097	0.0504028	0.0284012	0.162288	0.076809	0	0.21032	0	0.055076	0.035138	0	0	0.0424899	0.0225713	0.0541774	0.060923	0.118947	0.0282567	0	0.0541996	0	0	0	0.0595893	0.0335776	0.191866	0.0908082	0	0.248653	0	0.0651141	0.0415422	0	0	0.0502341	0.0266851	0.0640517	0.0720268	0.140627	0.0334068	0	0.064078	0	0
TCGA-05-5423	0.0474677	0.0229276	0.146319	0.149963	0.0548458	0.455212	0.0198857	0.00194569	0.0401006	0.0373455	0	0.0951787	0.00621086	0.0331305	0.0247728	0.0152359	0	0.0368724	0.0414531	0	0.00254046	0.362813	0.124266	0.0623619	0.0616533	0	0.0128105	0.0214232	0.0142445	0.00139374	0.0287249	0.0267513	0	0.0681784	0.00444897	0.0237321	0.0177452	0.0109138	0	0.0264125	0.0296937	0	0.00181978	0.259891	0.0890141	0.0446711	0.0441635	0	0.00917645
TCGA-50-6591	0	0.0631856	0	0.0540846	0.0815241	0.0886291	0.0017823	0	0.0498807	0.025673	0	0.152939	0	0.0227632	0.0243881	0	0.0443967	0	0	0.560074	0.0109631	0.0265747	0.0182532	0	0	0.0623127	0	0	0.000225919	0	0.00632272	0.00325423	0	0.019386	0	0.00288539	0.00309136	0	0.00562759	0	0	0.0709932	0.00138965	0.00336853	0.00231372	0	0	0.00789857	0
TCGA-49-4505	0.0897304	0.0918631	0.147843	0.112541	0	0.49367	0	0.0363959	0.0577816	0.100773	0	0.115584	0	0.0484134	0.0214036	0	0	0.0530712	0.0293825	0.00724091	0.0710966	0.300532	0.0517257	0.0345375	0.0701329	0	0	0.00192982	0	0.0235264	0.0373502	0.0651396	0	0.0747136	0	0.0312946	0.0138354	0	0	0.0343053	0.0189929	0.00468054	0.045957	0.194265	0.0334356	0.0223251	0.045334	0	0
TCGA-97-8552	0.154853	0.189183	0.033801	0.064511	0.0340403	0.489117	0	0.0778133	0.0107967	0.062125	0	0.127983	0	0.053133	0.00934243	0	0	0.0383947	0.0857806	7.19e-05	0.0219625	0.366878	0.0524635	0.017828	0.0740597	0	0	0.0013676	0	0.0576576	0.00800004	0.046033	0	0.094832	0	0.0393701	0.0069225	0	0	0.0284494	0.0635612	5.33e-05	0.0162736	0.271847	0.0388741	0.0132101	0.0548763	0	0
TCGA-MP-A4TJ	0.247461	0.349238	0.491055	0.301414	0	0.843213	0.00790759	0.0659602	0.0830466	0.121519	0	0.15596	0	0.114559	0.0262824	0.00958094	0	0.0499093	0.00540985	0.076865	0.108073	0.157597	0	0	0	0.0132892	0	0.00404002	0.0128177	0.106918	0.134614	0.196975	0	0.252802	0	0.185694	0.0426022	0.0155301	0	0.0809	0.00876905	0.124594	0.17518	0.255455	0	0	0	0.0215409	0
TCGA-73-4670	0.00138386	0	0.001714	0.0593691	0	0.165795	0	0.030611	0.141405	0.0780104	0	0.0408534	0	0.0576293	0.0273193	0	0	0.0425065	0.0320098	0.148387	0	0.223337	0	0.101599	0	0.0412097	0	0.0351227	0	0.00798434	0.0368831	0.0203477	0	0.0106559	0	0.0150316	0.00712576	0	0	0.0110871	0.00834919	0.0387042	0	0.0582534	0	0.0265003	0	0.0107488	0
TCGA-55-A493	0.0231747	0.277172	0.353985	0.217602	0	0.904828	0.0274099	0.0220016	0.0160093	0.16433	0	0.155498	0.0571312	0.0283006	0.0197843	0	0	0.0699431	0.0176102	0.0615639	0.105162	0.206279	0.0252421	0	0	0.0210726	0	0.00266219	0.0277684	0.0222893	0.0162187	0.166479	0	0.157531	0.0578784	0.0286707	0.0200431	0	0	0.0708579	0.0178405	0.0623691	0.106537	0.208977	0.0255722	0	0	0.0213482	0
TCGA-49-6745	0	0.00896889	0.327357	0.142789	0.0772814	0.383167	0	0	0	0.0422205	0	0.196617	0	0.0085183	0	0	0.0453919	0.0199524	0.0959285	0.0146788	0.0889605	0.341646	0.0123337	0	0.133753	0	0	0	0	0	0	0.0214841	0	0.10005	0	0.00433459	0	0	0.0230979	0.0101529	0.0488138	0.0074694	0.0452681	0.173849	0.00627607	0	0.0680608	0	0
TCGA-38-4631	0	0	0.0483073	0.0635345	0	0.177777	0.0569995	0	0.198802	0.093879	0	0.0948202	0	0.0519652	0.0148271	0.000263204	0	0.0657033	0.0163725	0.0928686	0.0834317	0.143543	0	0	0	0.0312496	0	0.0552747	0.0185284	0	0.0646234	0.0305166	0	0.0308226	0	0.016892	0.00481975	8.56e-05	0	0.0213577	0.00532209	0.0301882	0.0271206	0.0466606	0	0	0	0.0101581	0
TCGA-38-4626	0.0620011	0	0.321286	0.383199	0.302817	1.02506	0.0103895	0	0	0.0454342	0	0.0781793	0	0.0414913	0	0	0.00840621	0.0496863	0.081532	0.222279	0.00482154	0.280309	0.00278976	0.0188742	0	0.129762	0	0.0260454	0.00598891	0	0	0.0261901	0	0.0450657	0	0.0239173	0	0	0.00484568	0.0286412	0.0469983	0.128131	0.00277933	0.161581	0.00160813	0.0108799	0	0.0748	0
TCGA-55-7227	0.0330864	0.241642	0.139161	0.137795	0.0496858	0.608434	0.00227212	0.00520271	0.022192	0.0525206	0	0.247703	0	0.0373439	0.0320601	0	0	0.0194348	0.0593354	0.0112471	0.0641033	0.234565	0.144193	0.0197312	0.0479215	0	0	0.000173383	0.00174172	0.00398821	0.0170116	0.0402603	0	0.18988	0	0.0286264	0.0245761	0	0	0.014898	0.0454843	0.00862161	0.0491392	0.179809	0.110533	0.0151252	0.0367349	0	0
TCGA-55-A57B	0.0461387	0.187147	0.215348	0.133387	0.01207	0.611318	0.0154914	0	0	0.0475831	0	0.194954	0	0.0130966	0.0272153	0	0	0.0527213	0.0743547	0	0.0113801	0.302911	0.134579	0.0417076	0.0816228	0	0	0.00238399	0.0113775	0	0	0.0349469	0	0.143182	0	0.00961868	0.019988	0	0	0.0387206	0.054609	0	0.00835802	0.22247	0.09884	0.0306317	0.059947	0	0
TCGA-69-7979	0	0.10615	0.0170743	0.0434877	0.0608178	0.178637	0	0	0.119446	0.0651196	0	0.0880223	0	0.0535774	0.00614258	0	0	0.0604502	0.021339	0.0999312	0.0613031	0.326837	0	0.00482561	0.0862786	0	0	0.00672685	0	0	0.0421073	0.022956	0	0.0310296	0	0.0188871	0.00216538	0	0	0.0213099	0.00752242	0.0352277	0.0216106	0.115217	0	0.00170112	0.0304149	0	0
TCGA-44-A4SS	0.0747833	0.290783	0.165039	0.18495	0.146899	0.671766	0.0210592	0	0.0110957	0.151303	0	0.213926	0.00438075	0.0629787	0.00512023	0	0.0108971	0.0232798	0.0136001	0.0281522	0.110142	0.326449	0.00352493	0	0.0140911	0	0	0	0.0183969	0	0.00969293	0.132175	0	0.186881	0.00382693	0.0550169	0.00447292	0	0.00951949	0.0203368	0.0118808	0.0245931	0.0962179	0.285179	0.0030793	0	0.0123097	0	0
TCGA-05-4424	0.138011	0.0998444	0.241684	0.141432	0.247887	0.585658	0.0287945	0	0.032443	0.0933473	0	0.133879	0	0.0274164	0.00597236	0	0	0.00471604	0.0294398	0.0947281	0.0703606	0.452278	0.000780262	0	0.0164966	0	0	0.00934764	0.023882	0	0.026908	0.0774217	0	0.111039	0	0.022739	0.00495344	0	0	0.00391146	0.0244172	0.078567	0.0583567	0.375117	0.000647145	0	0.0136822	0	0
TCGA-MN-A4N5	0.122728	0.161096	0.123326	0.105205	0.0319309	0.373867	0	0.0409531	0.0272159	0.242205	0	0.0600742	0	0.126991	0.00337495	0	0	0.122873	0.0242071	0.0580058	0.123649	0.137841	0.00175376	0	0.0301559	0	0	0.000700317	0	0.0274566	0.0182466	0.162384	0	0.0402762	0	0.08514	0.0022627	0	0	0.0823791	0.0162294	0.0388894	0.0828991	0.0924143	0.00117579	0	0.0202177	0	0
TCGA-99-8028	0.231603	0.250091	0.352146	0.184463	0.1018	0.940389	0	0.0279764	0.103356	0.149588	0	0.136869	0	0.0525713	0.054161	0	0	0.0301041	0.00220154	0.0944196	0.0940517	0.251867	0	0	0.00283433	0	0	0	0	0.0291303	0.107619	0.155758	0	0.142514	0	0.0547396	0.0563948	0	0	0.0313458	0.00229234	0.0983139	0.0979308	0.262255	0	0	0.00295123	0	0
TCGA-75-5146	0.15276	0.110103	0.144936	0.0452232	0.0550694	0.241561	0	0.0703426	0.207156	0.0556771	0	0.221014	0	0.0761277	0.0162646	0.00327778	0	0.0304478	0.00307065	0	0.0308519	0.254289	0.00529184	0.0045695	0.012703	0	0	0.00891694	0	0.0389495	0.114705	0.0308291	0	0.122378	0	0.0421528	0.00900592	0.00181495	0	0.0168593	0.00170025	0	0.0170831	0.140803	0.00293015	0.00253018	0.00703382	0	0
TCGA-55-1596	0.00176784	0.00179148	0.0847835	0.10725	0	0.188821	0.0622732	0	0.257741	0.0421606	0	0.0136522	0	0.0650924	0.0567828	0	0.0237321	0	0	0.117948	0.0902716	0.177541	0	0.0794506	0	0.0133546	0	0	0.0280271	0	0.116	0.0189751	0	0.00614441	0	0.0292959	0.025556	0	0.010681	0	0	0.0530844	0.0406282	0.0799054	0	0.0357581	0	0.00601048	0
TCGA-55-7910	0.0834176	0.0508223	0.0551437	0.0768363	0	0.151276	0.0202799	0	0.323347	0.0266784	0	0.171801	0	0.0904975	0.00836745	0	0.0138742	0	0.025883	0.0728623	0.0199585	0.0913301	0	0.0626804	0	0.050467	0	0.0219735	0.00821124	0	0.130921	0.0108019	0	0.0695611	0	0.0366419	0.00338793	0	0.00561759	0	0.0104799	0.0295015	0.00808108	0.0369791	0	0.0253789	0	0.0204338	0
TCGA-80-5611	0.00212475	0.180837	0.00225064	0.19692	0.209957	0.655111	0	0.0339066	0	0.0381547	0	0.0410532	0	0.0501859	0.0347273	0	0	0.0312539	0.162165	0.254555	0.0710181	0.239409	0.00808444	0	0	0.0354868	0	0	0	0.0197546	0	0.0222296	0	0.0239183	0	0.0292392	0.0202327	0	0	0.0182091	0.0944803	0.148308	0.0413764	0.139484	0.00471014	0	0	0.0206752	0
TCGA-91-6828	0	0.0532602	0.329981	0.224213	0.0880906	0.51712	0.00178831	0.00280858	0.0162276	0.0572882	0	0.282071	0	0	0	0	0.0732568	0	0.104129	0.0536645	0.00936816	0.195885	0	0.0594911	0	0.0700886	0	0.0739335	0.00108906	0.0017104	0.00988245	0.0348879	0	0.171778	0	0	0	0	0.0446127	0	0.0634132	0.0326811	0.00570512	0.119292	0	0.0362295	0	0.0426832	0
TCGA-69-7761	0.297318	0.378946	0.208198	0.248122	0.0823086	0.807335	0.00530841	0.0127583	0.10442	0.164718	0	0.202863	0.0243071	0.0398938	0	0	0	0.0203432	0.0318657	0.0611417	0.0995683	0.160982	0.0145416	0.00479975	0.052489	0	0	0	0.00650776	0.0156409	0.128012	0.201933	0	0.248696	0.0297989	0.0489071	0	0	0	0.0249394	0.0390653	0.0749557	0.122064	0.197353	0.0178271	0.00588417	0.064348	0	0
TCGA-91-6849	0.0267292	0.0637647	0.464111	0.196488	0.0967046	0.560729	0.00988879	0.00226469	0.042112	0.0406404	0	0.268056	0	0.0144898	0	0	0.0818655	0.0640831	0.0765352	0.0680902	0.0207055	0.159996	0	0.0588595	0.0292455	0.0433839	0	0.0197834	0.00700547	0.00160436	0.0298333	0.0287907	0	0.189898	0	0.0102649	0	0	0.0579956	0.0453981	0.0542195	0.0482368	0.0146683	0.113345	0	0.0416976	0.0207183	0.0307343	0
TCGA-MP-A4TH	0.391155	0.452821	0.041809	0.0960238	0	0.55359	0.0224968	0.166778	0.0818278	0.135625	0	0.1397	0	0.071747	0.0638437	0	0	0.0511108	0.00886813	0.0114632	0.0198769	0.179375	0.0127324	0.0106417	0.023913	0	0	0	0.0248763	0.184419	0.090483	0.149971	0	0.154477	0	0.0793359	0.0705968	0	0	0.056517	0.00980615	0.0126757	0.0219794	0.198348	0.0140792	0.0117673	0.0264423	0	0
TCGA-44-7669	0.0814001	0.0895326	0.200384	0.138949	0.155374	0.431959	0.037076	0	0.0435319	0.0657785	0	0.146071	0.0150667	0.0451005	0	0	0	0.0238015	0.0160083	0.065016	0.104909	0.380465	0.00531447	0	0.0457914	0	0	0.00606948	0.0325427	0	0.0382093	0.0577358	0	0.128211	0.0132245	0.0395861	0	0	0	0.0208913	0.014051	0.0570665	0.092082	0.333946	0.00466467	0	0.0401924	0	0
TCGA-73-7499	0.0862133	0.103396	0.21291	0.114998	0	0.394636	0.00742377	0.00624229	0.0583271	0.244232	0	0.00577376	0.0181371	0.0521683	0.0766698	0.0651847	0	0.0484457	0	0.000755853	0.151394	0.232392	0.0125041	0	0.0203495	0	0	0	0.00502279	0.00422342	0.039463	0.165243	0	0.00390642	0.0122712	0.0352962	0.0518734	0.0441028	0	0.0327775	0	0.000511396	0.102431	0.157232	0.00846005	0	0.0137681	0	0
TCGA-55-8505	0.0130466	0.106112	0	0.0727767	0.0507436	0.296639	0	0.00687172	0.205677	0.0304662	0	0.0655035	0	0.0232339	0.0221392	0	0	0.0121865	0	0.371008	0.0220039	0.196445	0	0	0.0047226	0.0356633	0	0.00407901	0	0.00269929	0.0807922	0.0119675	0	0.0257306	0	0.00912655	0.00869654	0	0	0.00478702	0	0.145736	0.0086434	0.0771661	0	0	0.00185509	0.014009	0
TCGA-86-8671	0.52615	0.698492	0.233566	0.229673	0.106112	1.20387	0.014337	0.0397215	0.00230362	0.10304	0	0.21724	0	0.0399992	0.0550007	0	0.0109905	0.0174769	0.00369282	0.163788	0.129891	0.155037	0.00351034	0	0.043972	0	0	0	0.0233105	0.0645831	0.00374545	0.167533	0	0.353209	0	0.0650345	0.0894254	0	0.0178694	0.0284156	0.00600414	0.266302	0.21119	0.252073	0.00570744	0	0.071494	0	0
TCGA-95-7948	0.0453097	0.0152303	0.238465	0.0324852	0.0110805	0.24542	0	0.0424566	0.117454	0.0849439	0	0.099891	0	0.040175	0	0.0146568	0	0.04425	0.0472943	0	0.0184425	0.357212	0.0220229	0.0271444	0.084057	0	0	0	0	0.0114612	0.0317068	0.0229306	0	0.0269656	0	0.0108452	0	0.00395662	0	0.0119453	0.0127671	0	0.00497856	0.0964293	0.00594507	0.00732762	0.0226912	0	0
TCGA-95-7043	0.04737	0.0164766	0	0	0	0.0310989	0	0.027957	0.147887	0.145549	0	0.0610573	0	0.112306	0.0461741	0	0	0.0460174	0.0150841	0	0.0359516	0.317557	0.00714255	0.0103889	0.0269285	0	0	0	0	0.00449111	0.0237571	0.0233814	0	0.00980846	0	0.0180413	0.00741758	0	0	0.0073924	0.00242317	0	0.0057754	0.0510135	0.0011474	0.00166891	0.0043259	0	0
TCGA-50-5044	0.00685097	0.131567	0.0975632	0.0185299	0.000271116	0.474332	0	0.0148517	0.0692277	0.126173	0	0.0864019	0	0.0538478	0.0479232	0	0	0.0924398	0.00862224	0.0265771	0.034015	0.295246	0.0160868	0.0871981	0.0413899	0	0	0	0	0.00522822	0.0243702	0.0444165	0	0.030416	0	0.018956	0.0168704	0	0	0.0325416	0.00303528	0.00935594	0.0119743	0.103935	0.00566302	0.0306963	0.0145705	0	0
TCGA-J2-A4AG	0.172939	0.264295	0.236591	0.190724	0.0114688	0.596145	0.0301343	0.091835	0.0503679	0.0695811	0	0.216189	0	0.0401888	0.0390062	0	0	0.0286723	0.0434492	0	0.0212202	0.240807	0.0519495	0.0547579	0.000464706	0.0213765	0	0	0.0321934	0.0981101	0.0538095	0.0743355	0	0.230961	0	0.0429349	0.0416715	0	0	0.0306314	0.046418	0	0.0226702	0.257261	0.0554992	0.0584994	0.000496459	0.0228372	0
TCGA-86-7955	0	0.00948402	0.0565895	0	0	0.0313684	0.0244084	0.0257474	0.0727348	0.125721	0	0.129935	0	0.138383	0.0595471	0	0	0.091633	0.011639	0.0490385	0.0656246	0.11313	0	0.0564193	0.0360394	0	0	0	0.00414982	0.00437746	0.0123661	0.0213746	0	0.022091	0	0.0235273	0.010124	0	0	0.0155791	0.00197882	0.00833734	0.0111572	0.0192339	0	0.00959218	0.00612728	0	0
TCGA-62-A472	0.0731684	0.139859	0.133181	0.122345	0.0273853	0.390166	0.0288284	0	0.000778396	0.125516	0	0.192433	0	0.0776866	0.0180335	0	0	0.0815789	0.0155499	0.0193469	0.0640088	0.21554	0.0470446	0	0.109734	0	0	0.00392101	0.0190384	0	0.000514056	0.0828915	0	0.127084	0	0.0513046	0.0119094	0	0	0.0538751	0.0102692	0.0127768	0.0422717	0.142343	0.0310685	0	0.072469	0	0
TCGA-MP-A4SV	0.128387	0.225854	0.177871	0.130231	0	0.513202	8.97e-05	0.0232955	0.0680609	0.15783	0	0.15196	0.00115856	0.0841392	0.0356984	0	0	0.0597936	0.0172561	0.0319123	0.122125	0.201053	0.00460093	0	0.0404177	0	0	0.000608986	8.42e-05	0.0218553	0.0638531	0.148072	0	0.142566	0.00108693	0.0789375	0.0334914	0	0	0.056097	0.0161892	0.0299394	0.114575	0.188623	0.00431649	0	0.0379189	0	0
TCGA-49-AARN	0.152432	0.191423	0	0.0722602	0	0.308558	0	0.162882	0.100846	0.0734047	0	0.143618	0	0.0797751	0.0800079	0	0	0.0582521	0.0107114	0.0220351	0.0389014	0.15794	0.0130363	0.0108097	0.0477798	0	0	0	0	0.110464	0.0683924	0.0497819	0	0.0973993	0	0.0541022	0.0542601	0	0	0.0395057	0.00726429	0.0149438	0.0263823	0.107112	0.00884104	0.00733099	0.0324035	0	0
TCGA-50-5072	0.00121665	0.0950722	0.0851319	0.0719288	0.0151384	0.368852	0.0192703	0	0.0935231	0.040764	0	0.160546	0	0.0397259	0.0423187	0	0.015719	0.00626272	0.0259605	0.122899	0.0623087	0.325212	0	0.0193282	0.0128992	0	0	0.013262	0.0110381	0	0.0535701	0.0233496	0	0.091961	0	0.022755	0.0242402	0	0.00900383	0.00358729	0.0148702	0.0703966	0.0356905	0.186282	0	0.0110712	0.00738869	0	0
TCGA-55-5899	0.0267179	0.0145486	0.162179	0.0840393	0.210503	0.232408	0.0145441	0	0.044627	0.027817	0	0.0693359	0	0.045728	0.0132284	0	0.00769961	0.0541019	0	0.274051	0.0752634	0.348884	0.00253164	0	0.0200865	0	0	0.00210202	0.00868303	0	0.0266428	0.0166071	0	0.0413944	0	0.0273002	0.00789749	0	0.00459676	0.0322995	0	0.163612	0.0449332	0.208288	0.00151142	0	0.0119919	0	0
TCGA-97-A4LX	0.365218	0.470974	0.116509	0.223907	0.152869	1.04325	0.0287021	0.0106789	0.0518675	0.108388	0	0.14033	0	0.0610376	0.0611129	0	0	0.0456566	0.0256606	0.00455291	0.122419	0.269501	0.0220165	0	0.042951	0	0	0.00512592	0.0450088	0.0167459	0.0813351	0.169966	0	0.220056	0	0.0957151	0.0958331	0	0	0.0715957	0.0402393	0.00713957	0.191969	0.422614	0.0345249	0	0.0673529	0	0
TCGA-L9-A444	0.257574	0.192802	0.441287	0.145527	0	0.715006	0.0115271	0.0045046	0.105209	0.229594	0	0.145268	0.00532951	0.109176	0.0014561	0	0	0.0499733	0.0080547	0.00915807	0.16206	0.145688	0.00222116	0	0.0107797	0	0	0	0.0109101	0.00426346	0.0995773	0.217303	0	0.137492	0.00504421	0.103332	0.00137815	0	0	0.0472981	0.00762352	0.00866782	0.153385	0.137889	0.00210225	0	0.0102027	0	0
TCGA-55-8615	0.0128453	0.0664804	0	0.000710425	0	0.122097	0.00955379	0	0.0117635	0.0266037	0	0.0261885	0	0.153616	0.0314764	0	0.00256801	0.0271724	0.031403	0.393115	0	0.220539	0	0.0585049	0.00749586	0	0	0	0.00290534	0	0.00357732	0.00809029	0	0.00796403	0	0.0467152	0.00957209	0	0.000780943	0.00826321	0.00954977	0.119548	0	0.0670666	0	0.0177915	0.00227952	0	0
TCGA-50-7109	0.0764616	0.100314	0.129735	0.0927077	0.0314943	0.21083	0.00533447	0.00213776	0.17766	0.133686	0	0.113029	0	0.065497	0.0189394	0	0	0.0489247	0.0192794	0.0640613	0.117076	0.207683	0	0	0	0.0230605	0	0.0036313	0.00311454	0.00124813	0.103727	0.0780529	0	0.0659919	0	0.0382405	0.0110578	0	0	0.0285648	0.0112563	0.0374023	0.0683549	0.121256	0	0	0	0.0134639	0
TCGA-91-7771	0.0970479	0.204317	0.280495	0.134373	0.167809	0.476891	0.0173404	0	0.0433729	0.113495	0	0.30415	0	0.0359596	0	0	0	0.0319871	0.0193618	0.0125627	0.0916721	0.31946	0.000249336	0	0.0095114	0	0	0.000877602	0.0155706	0	0.0389464	0.101912	0	0.273109	0	0.0322896	0	0	0	0.0287226	0.0173858	0.0112806	0.0823162	0.286857	0.00022389	0	0.00854069	0	0
TCGA-97-A4M1	0.0406081	0.175512	0.0704208	0.0620471	0.0174737	0.40612	0.0101424	0.003336	0	0.0719872	0	0.10585	0	0.0324425	0.0356797	0	0.0359763	0.0201799	0.124676	0.0360465	0.0229491	0.304757	0.0127999	0.0102335	0.172944	0	0	0	0.00586199	0.0019281	0	0.0416063	0	0.0611776	0	0.0187507	0.0206217	0	0.0207931	0.0116633	0.0720589	0.0208337	0.0132638	0.17614	0.00739793	0.00591463	0.0999562	0	0
TCGA-44-5644	0.0228648	0.0576849	0.00812204	0.0222292	0	0.123721	0.0237079	0	0.157044	0.105012	0	0.127946	0	0.112368	0.00253208	0	0.0578651	0.00504121	0	0.0999907	0.0250652	0.172596	0	0.00632896	0	0.0793766	0	0.0251253	0.00675473	0	0.0447442	0.0299196	0	0.0364538	0	0.0320153	0.000721426	0	0.0164866	0.00143632	0	0.0284889	0.00714145	0.0491752	0	0.00180321	0	0.0226156	0
TCGA-78-7536	0.03246	0.0814981	0.047237	0.134368	0.0509668	0.236156	0.00312075	0	0.0833067	0.114597	0	0.109215	0.0100226	0.0529267	0	0	0.0132522	0.0406968	0.0441098	0	0.0785876	0.385517	0.0097872	0	0	0.0498369	0	0.00502393	0.00154781	0	0.0413179	0.056837	0	0.0541677	0.00497094	0.0262502	0	0	0.00657273	0.0201845	0.0218773	0	0.0389773	0.191206	0.00485418	0	0	0.0247178	0
TCGA-MP-A4TI	0	0.503877	0.196717	0.314298	0.0393939	1.17239	0.00203096	0.00280272	0.005455	0.081211	0	0.151165	0	0.055364	0.0354876	0	0	0.0495445	0.025738	0.164759	0.127199	0.274955	0	0.0039424	0.0203466	0	0	0	0.00269958	0.00372543	0.00725088	0.107947	0	0.200931	0	0.0735907	0.0471707	0	0	0.0658554	0.0342113	0.219001	0.169075	0.365475	0	0.0052403	0.027045	0	0
TCGA-05-4403	0	0.132388	0.12902	0.0960596	0.0728621	0.551991	0.00865049	0.00299419	0	0.0488095	0	0.126034	0	0.0497767	0.0334854	0	0.00283603	0.0232497	0.0689024	0.106733	0.057407	0.402221	0.0202851	0	0.0486153	0	0	0	0.00447504	0.00154894	0	0.0252499	0	0.0651995	0	0.0257503	0.0173225	0	0.00146712	0.0120274	0.0356443	0.0552149	0.0296975	0.208075	0.0104938	0	0.0251495	0	0
TCGA-99-7458	0.094138	0.285331	0.285222	0.13838	0.0448051	0.738466	0.00803826	0.00190794	0	0.116913	0	0.274557	0	0.0628127	0.0672799	0	0	0.0283636	0.0290479	0.0198759	0.0705585	0.229605	0.0386815	0	0.0523589	0	0	0	0.0085592	0.00203159	0	0.12449	0	0.29235	0	0.0668835	0.0716401	0	0	0.0302018	0.0309304	0.021164	0.0751312	0.244485	0.0411883	0	0.0557522	0	0
TCGA-64-5778	0.296422	0.0643417	0.250345	0.0943122	0	0.526312	0.0126274	0.0307774	0.0730421	0.241345	0	0.0295509	0	0.0921199	0.0403674	0.0582028	0	0.0803709	0	0.017982	0.120913	0.192439	0	0	0.0102621	0	0	0	0.00775799	0.0189089	0.0448752	0.148277	0	0.0181554	0	0.0565962	0.0248007	0.0357584	0	0.0493778	0	0.0110477	0.0742858	0.118229	0	0	0.00630477	0	0
TCGA-78-7145	0.0196519	0.116606	0.0258979	0.0984538	0.0472948	0.439527	0.00611339	0	0.0250314	0	0	0.212124	0.0144789	0.0213193	0.0253497	0	0.00632206	0	0.0919396	0.0859674	0.0183652	0.255879	0.0593427	0.0530415	0.0586815	0.0550505	0	0.0109937	0.00254017	0	0.0104008	0	0	0.0881395	0.00601611	0.00885835	0.010533	0	0.00262687	0	0.0382017	0.0357202	0.0076309	0.10632	0.0246574	0.0220392	0.0243827	0.0228739	0
TCGA-NJ-A4YP	0	0.111328	0.0061929	0.111308	0	0.220855	0	0.0115883	0.0609467	0.136998	0	0.0328263	0	0.0844367	0.0291192	0	0	0.0572075	0.00179175	0.130935	0.0682306	0.25824	0	0.0864556	0.0344316	0.000261017	0	0.00653249	0	0.00623926	0.0328143	0.073761	0	0.017674	0	0.0454616	0.0156781	0	0	0.0308011	0.000964696	0.0704966	0.0367361	0.139039	0	0.0465486	0.0185383	0.000140535	0
TCGA-55-7283	0.0333016	0.0791239	0.214057	0.0667127	0.00263789	0.336522	0.0110925	0	0.00718948	0.101959	0	0.253847	0	0.0327999	0	0	0	0.0232521	0.0413864	0.0307905	0.065069	0.297197	0.0354661	0.00894078	0.0894739	0	0	0.00153682	0.00574457	0	0.00372327	0.0528021	0	0.131462	0	0.0169863	0	0	0	0.0120417	0.0214331	0.0159457	0.0336977	0.153912	0.0183671	0.00463023	0.0463365	0	0
TCGA-55-8208	0.200869	0.308308	0.203295	0.307171	0.218606	0.889117	0.00521411	0.0572449	0.0478716	0.095927	0	0.0975018	0.00299169	0.0521184	0.0351362	0	0	0.0569099	0.0192403	0.0600537	0.134457	0.278227	0.0100689	0	0.0288342	0	0	0.0182027	0.00730874	0.0802414	0.0671027	0.134463	0	0.13667	0.00419351	0.0730556	0.0492513	0	0	0.0797718	0.0269696	0.0841786	0.188472	0.389998	0.0141137	0	0.0404175	0	0
TCGA-78-7537	0.0469108	0.121471	0	0	0	0.214462	0	0.0239689	0.250261	0.137282	0	0.0924698	0	0.045431	0.0605624	0	0	0.0418836	0.0139305	0.00172949	0.00416218	0.235799	0.0267436	0.0219553	0.043821	0	0	0	0	0.00796327	0.0831452	0.0456096	0	0.0307216	0	0.0150937	0.0201209	0	0	0.0139152	0.00462818	0.000574595	0.00138282	0.0783405	0.00888514	0.0072943	0.0145588	0	0
TCGA-78-7166	0.0152362	0.0355728	0	0	0	0.0470988	0	0.0580252	0.143081	0.0820515	0	0.149337	0	0.116	0.0603135	0	0	0.0361591	0	0.131485	0.102467	0.119121	0	0	0.00195897	0	0	0	0	0.0123568	0.03047	0.0174733	0	0.0318021	0	0.0247028	0.0128441	0	0	0.00770029	0	0.0280006	0.021821	0.0253676	0	0	0.000417173	0	0
TCGA-55-7995	0.10997	0.278952	0.356781	0.263819	0.0612104	0.82797	0.0145905	0.0373862	0	0.117473	0	0.102124	0	0.0565048	0.0481291	0.033398	0	0.0460388	0.0282385	0.278881	0.114589	0.10929	0.00497082	0	0	0.00838761	0	0	0.0161968	0.0415021	0	0.130406	0	0.113367	0	0.0627256	0.0534278	0.037075	0	0.0511074	0.0313474	0.309584	0.127204	0.121322	0.00551807	0	0	0.00931104	0
TCGA-49-4494	0.00600908	0.0375879	0.0301147	0.0510637	0	0.219843	0.0264737	0	0	0.0685912	0	0.0298794	0.0214879	0.103495	0	0.0542693	0	0.0597495	0.0142851	0.0533891	0.0770099	0.36241	0.0776733	0.00921614	0.039651	0	0	0.00241946	0.00866519	0	0	0.0224507	0	0.00977989	0.00703327	0.0338752	0	0.017763	0	0.0195568	0.00467569	0.0174749	0.0252063	0.118621	0.0254234	0.00301656	0.0129783	0	0
TCGA-49-4501	0.102411	0.133611	0.136908	0.0609272	0	0.366129	0.00715298	0.0617311	0.0881298	0.0532592	0	0.228186	0	0.053162	0.0153155	0.0115737	0	0.0419944	0.0323067	0	0.0335217	0.261004	0.0167548	0.0397013	0.0542508	0	0	0.00195662	0.00518393	0.0447379	0.0638696	0.0385981	0	0.165371	0	0.0385277	0.0110995	0.0083877	0	0.0304342	0.0234134	0	0.0242939	0.189155	0.0121426	0.0287724	0.0393167	0	0
TCGA-91-6847	0.062939	0.114428	0.191936	0.107212	0.0868605	0.457401	0	0	0.0202773	0.042387	0	0.225838	0	0	0	0	0.0715727	0	0.0417567	0.150297	0	0.288488	0	0.0435407	0.0800324	0	0	0.0358101	0	0	0.00858738	0.0179508	0	0.095642	0	0	0	0	0.0303108	0	0.0176839	0.0636505	0	0.122174	0	0.0184394	0.0338935	0	0
TCGA-75-5126	0.119764	0	0.320685	0.31694	0.241998	0.895355	0	0.0381364	0	0.0698258	0	0.0497765	0.061416	0.0195511	0.00451374	0	0.00520382	0	0.0267231	0.102008	0.0754836	0.423654	0.0139209	0.029285	0.0030452	0.0333412	0.00262382	0.0414918	0	0.0346196	0	0.0633868	0	0.0451864	0.0557525	0.0177482	0.0040975	0	0.00472395	0	0.0242589	0.0926011	0.0685228	0.384587	0.0126371	0.0265845	0.00276439	0.0302666	0.00238186
TCGA-86-A4JF	0.057962	0.129998	0.147737	0.0976708	0	0.535376	0.00672426	0	0.0729678	0.106102	0	0.0888201	0.0135006	0.126762	0	0	0.017397	0.068667	0.0327906	0.0298329	0.110385	0.2595	0	0.0165317	0.0441538	0	0	0.00586522	0.00370237	0	0.040176	0.0584198	0	0.0489043	0.00743342	0.0697952	0	0	0.00957876	0.037808	0.0180545	0.0164259	0.0607777	0.142881	0	0.00910235	0.0243111	0	0
TCGA-49-AAR2	0.135252	0.141919	0.00383347	0.0060918	0	0.176981	0	0.0353225	0.293571	0.105485	0	0.123412	0	0.0556474	0.0555571	0	0	0.0336152	0.00954212	0.0186263	0.0408396	0.211491	0	0	0.00901016	0	0	0.00788159	0	0.0128543	0.106834	0.0383872	0	0.0449109	0	0.0202507	0.0202179	0	0	0.012233	0.00347249	0.00677834	0.014862	0.076964	0	0	0.0032789	0	0
TCGA-75-6211	0.104236	0.076968	0.107358	0.0350335	0.000931164	0.258186	0.0507033	0	0.23952	0.113413	0	0.126949	0.0621616	0.0732416	0.0351175	0	0.0184537	0	0.00793003	0.0117058	0.0203026	0.226847	0.00613482	0	0.000387298	0	0	0.00713249	0.0230361	0	0.108821	0.0515269	0	0.0576769	0.0282419	0.0332759	0.0159549	0	0.00838407	0	0.00360285	0.00531832	0.00922408	0.103063	0.00278724	0	0.000175961	0	0
TCGA-78-7159	0.0980065	0.0850926	0.00730243	0.0900005	0	0.126128	0.00791648	0.0141798	0.207645	0.0849035	0	0.197884	0	0.0150331	0.0532175	0	0	0.064057	0	0.0852778	0.0529937	0.118484	0	0.00627313	0	0.0532959	0	0.0388392	0.0047835	0.00856807	0.125469	0.0513026	0	0.11957	0	0.0090837	0.0321565	0	0	0.0387062	0	0.0515288	0.0320212	0.0715937	0	0.00379051	0	0.0322039	0
TCGA-55-6971	0.0668066	0.14994	0.285459	0.186769	0.218257	0.644536	0.0101606	0	0.0128692	0.145055	0	0.12902	0	0.0118866	0	0	0.0240386	0.0165842	0.0779962	0.100888	0.036579	0.30996	0.00388358	0.00333162	0.0913453	0.00642606	0	0.0199769	0.00759644	0	0.00962151	0.108449	0	0.0964603	0	0.00888693	0	0	0.0179723	0.012399	0.0583132	0.0754281	0.027348	0.231739	0.00290352	0.00249085	0.0682935	0.00480439	0
TCGA-50-5933	0	0.00184669	0.423943	0.445881	0	0.79388	0	0	0.00519735	0.0852419	0	0.126416	0	0	0	0	0.0196944	0.0194449	0.188978	0.103534	0.0110059	0.200403	0	0.0762043	0.0214758	0.0424416	0	0.0999631	0	0	0.00421505	0.0691312	0	0.102523	0	0	0	0	0.0159722	0.0157698	0.153261	0.0839657	0.00892582	0.162527	0	0.0618017	0.0174168	0.0344201	0
TCGA-95-A4VK	0.107855	0.28306	0.0781649	0.0651998	0	0.300097	0.0561544	0.0994067	0.0779815	0.118021	0	0.173338	0	0.0986906	0.0400482	0	0	0.046042	0.0131933	0.069032	0.0705366	0.110426	0	0.00427169	0.0228586	0	0	0	0.0381611	0.0675542	0.0529942	0.0802042	0	0.117796	0	0.0670676	0.0272157	0	0	0.031289	0.00896583	0.0469123	0.0479349	0.0750423	0	0.00290293	0.0155341	0	0
TCGA-64-5779	0.238533	0.165677	0.175311	0.0934953	0.0116519	0.238166	0	0.0434662	0.377419	0.124505	0	0.202085	0.0332945	0.0240963	0.0100621	0.0041957	0	0	0	0.0540155	0.0657774	0.0589392	0	0	0	0.0021446	0	0	0	0.0307825	0.267286	0.0881735	0	0.143115	0.023579	0.0170649	0.00712591	0.00297137	0	0	0	0.0382535	0.0465832	0.0417404	0	0	0	0.00151879	0
[truncated: 119 more rows]
[truncated: 71 more columns]

## Sheet: Differential gene expression 
Supplementary Table 6:Differentiating differentially expressed genes based on PTGFRN expression levels
	logFC	AveExpr	t	P.Value	adj.P.Val	B
[truncated: 17,201 more rows]
